# Supplementary material for: To flea or not to flea: survey of UK companion animal ectoparasiticide usage and activities affecting pathways to the environment
Source: PeerJ. 2023 Aug 4;11:e15561. doi: 10.7717/peerj.15561 (PMC10405796; doi:10.7717/peerj.15561)
Supplement: Supplemental Information 3 [file peerj-11-15561-s003.xlsx]

## Sheet: processed_survey_dataframe
timestamp	species	dg_size	dg_weight	dg_age	dg_flrx_yn	dg_proph_yn	dg_natural	dg_natural_which	dgflrx_1	dgflrx_main	dgflrx_fr	dgflrx_purch	dg_stroke	dg_warning_aware	dg_warning_follow	dg_se	dg_fl_suspect	dg_fl_seen	dg_fl_month	dg_tick_seen	dg_tick_month	dg_worms_rx	dg_sleep_all	dg_sleep_main	dg_bed_freq	dg_lap	dg_wash_freq	dg_wash_where	dg_swim	dg_walk_time	dg_outdoor_time	dg_walk_area	dg_walk_rain	dg_poo_scale	dg_poo_all	dg_poo_main	dg_working	ct_size	ct_weight	ct_age	ctflrx_yn	ct_prophy	ct_natural	ct_natural_which	ctflrx_1	ctflrx_main	ctflrx_fr	ctflrx_purch	ct_stroke
2020/06/22 12:01:43 PM GMT+1	Cat	NA	NA	NA	NA	NA	NA	NA	NA	NA	NA	NA	NA	NA	NA	NA	NA	NA	NA	NA	NA	NA	NA	NA	NA	NA	NA	NA	NA	NA	NA	NA	NA	NA	NA	NA	NA	Large (above 4 kg)	5	2	No	NA	NA	NA	NA	NA	NA	NA	NA
2020/06/22 12:20:01 PM GMT+1	Cat	NA	NA	NA	NA	NA	NA	NA	NA	NA	NA	NA	NA	NA	NA	NA	NA	NA	NA	NA	NA	NA	NA	NA	NA	NA	NA	NA	NA	NA	NA	NA	NA	NA	NA	NA	NA	Large (above 4 kg)	4.9	9	Yes	To prevent fleas (or other pests)	No	NA	Advocate	Advocate	12	From a veterinary practice	Yes
2020/06/22 12:21:11 PM GMT+1	Dog	Large (20-40kg)	30	12	Yes	To prevent fleas (or other pests)	No	NA	Advocate;Seresto collar	Seresto collar	12	Online	Yes	Yes	Yes	NA	No	No	NA	No	NA	3	In their own bed	In their own bed	Every 6 months	Every week	Every 3 months	At the groomers	Every 6 months	30 minutes	30 minutes	Mainly on unpaved surfaces like field margins, forest tracks or the beach	Yes, I walk my dog even if it is raining heavily and my dog gets completely wet	10	Bag and bin (home council bin)	Bag and bin (home council bin)	No	NA	NA	NA	NA	NA	NA	NA	NA	NA	NA	NA	NA
2020/06/22 12:21:26 PM GMT+1	Dog	Large (20-40kg)	38	7	Yes	To prevent fleas (or other pests)	No	NA	Bravecto tablet	Bravecto tablet	4	Online	NA	NA	NA	NA	No	No	NA	Yes	May	12	In their own bed;On the floor	In their own bed	Every month	Every day	Every 2 weeks	Outdoors	Every month	30 minutes	6 hours	Mainly on unpaved surfaces like field margins, forest tracks or the beach	Yes, I walk my dog even if it is raining heavily and my dog gets completely wet	5	Bag and bin (specific dog poo bin);Bag and bin (home council bin);None of the above/don't know	None of the above/don't know	Yes	NA	NA	NA	NA	NA	NA	NA	NA	NA	NA	NA	NA
2020/06/22 12:21:33 PM GMT+1	Dog	Large (20-40kg)	32	5	Yes	To prevent fleas (or other pests)	No	NA	Bravecto tablet	Bravecto tablet	1	From a veterinary practice	No	Yes	Yes	NA	Yes	No	NA	No	NA	2	On the floor	On the floor	Don't know	Every day	Never	Outdoors	Every 2 weeks	30 minutes	30 minutes	Mainly on paved surfaces	Yes, I will walk my dog in light drizzle	10	Bag and bin (specific dog poo bin)	Bag and bin (specific dog poo bin)	No	NA	NA	NA	NA	NA	NA	NA	NA	NA	NA	NA	NA
2020/06/22 12:22:24 PM GMT+1	Cat	NA	NA	NA	NA	NA	NA	NA	NA	NA	NA	NA	NA	NA	NA	NA	NA	NA	NA	NA	NA	NA	NA	NA	NA	NA	NA	NA	NA	NA	NA	NA	NA	NA	NA	NA	NA	Large (above 4 kg)	4.6	5	Yes	To prevent fleas (or other pests)	No	NA	Advocate;Credelio;Stronghold	Credelio	10	From a veterinary practice	Yes
2020/06/22 12:22:58 PM GMT+1	Dog	Large (20-40kg)	21	13	Yes	To prevent fleas (or other pests)	No	NA	Bravecto tablet;NexGard spectra	Nexgard spectra	12	From a veterinary practice	NA	NA	NA	NA	No	No	NA	No	NA	3	In their own bed	In their own bed	Less than once a year	Every day	Every 3 months	In a bath, sink or shower	Never	My dog doesn't go for walks	6 hours	NA	NA	5	Bag and bin (home council bin)	Bag and bin (home council bin)	No	NA	NA	NA	NA	NA	NA	NA	NA	NA	NA	NA	NA
2020/06/22 12:23:10 PM GMT+1	Cat	NA	NA	NA	NA	NA	NA	NA	NA	NA	NA	NA	NA	NA	NA	NA	NA	NA	NA	NA	NA	NA	NA	NA	NA	NA	NA	NA	NA	NA	NA	NA	NA	NA	NA	NA	NA	Small (below 4kg)	3.6	8	Yes	To prevent fleas (or other pests)	No	NA	Bravecto;Prinovox	Prinovox	8	From a veterinary practice	Yes
2020/06/22 12:24:19 PM GMT+1	Dog	Miniature (< 4 kg)	3.9	5	Yes	To prevent fleas (or other pests)	No	NA	Advocate	Advocate	10	From a veterinary practice	Yes	Yes	Yes	NA	No	No	NA	No	NA	4	On a family member's bed	On a family member's bed	Every 3 months	Every day	Every week or more	In a bath, sink or shower	Once a year	30 minutes	2 hours	An equal mixture of the above	Never	5	Bag and bin (specific dog poo bin);Bag and bin (home council bin);Flush down the toilet	Bag and bin (home council bin)	No	NA	NA	NA	NA	NA	NA	NA	NA	NA	NA	NA	NA
2020/06/22 12:26:17 PM GMT+1	Dog	Large (20-40kg)	40	2	Yes	To prevent fleas (or other pests)	No	NA	NexGard	NexGard	12	From a veterinary practice	NA	NA	NA	NA	No	No	NA	No	NA	4	In their own bed;On the furniture;On the floor	In their own bed	Once a year	Every day	Every 6 months	In a bath, sink or shower	Every 6 months	2 hours	2 hours	An equal mixture of the above	Yes, I will walk my dog in light drizzle	10	Bag and bin (specific dog poo bin)	Bag and bin (specific dog poo bin)	No	NA	NA	NA	NA	NA	NA	NA	NA	NA	NA	NA	NA
2020/06/22 12:26:39 PM GMT+1	Dog	Large (20-40kg)	24	8	Yes	To prevent fleas (or other pests)	No	NA	Bravecto tablet	Bravecto tablet	4	From a veterinary practice	NA	NA	NA	NA	No	No	NA	Yes	March	4	On a family member's bed	On a family member's bed	Every 3 months	Every day	Never	NA	Every 3 months	2 hours	3 hours	Mainly on unpaved surfaces like field margins, forest tracks or the beach	Yes, I will walk my dog in light drizzle	9	Bag and bin (specific dog poo bin);Straight in a bin (of any kind)	Bag and bin (home council bin)	No	NA	NA	NA	NA	NA	NA	NA	NA	NA	NA	NA	NA
2020/06/22 12:27:11 PM GMT+1	Cat	NA	NA	NA	NA	NA	NA	NA	NA	NA	NA	NA	NA	NA	NA	NA	NA	NA	NA	NA	NA	NA	NA	NA	NA	NA	NA	NA	NA	NA	NA	NA	NA	NA	NA	NA	NA	Large (above 4 kg)	8	2	Yes	To prevent fleas (or other pests)	No	NA	Stronghold	Stronghold	12	From a veterinary practice	No
2020/06/22 12:28:24 PM GMT+1	Dog	Small (4-10kg)	5	7	Yes	To prevent fleas (or other pests)	No	NA	Advocate;NexGard	NexGard	12	From a veterinary practice	NA	NA	NA	NA	No	No	NA	No	NA	12	In their own bed;On the floor;In a crate	In their own bed	Every 2 weeks	Every day	Every month	In a bath, sink or shower	Never	1 hour	2 hours	An equal mixture of the above	Yes, I walk my dog even if it is raining heavily and my dog gets completely wet	10	Bag and bin (specific dog poo bin);Bag and bin (home council bin)	Bag and bin (specific dog poo bin)	No	NA	NA	NA	NA	NA	NA	NA	NA	NA	NA	NA	NA
2020/06/22 12:29:46 PM GMT+1	Dog	Small (4-10kg)	9.4	8	Yes	To prevent fleas (or other pests)	No	NA	Bravecto tablet	Bravecto tablet	4	From a veterinary practice	NA	NA	NA	NA	No	No	NA	No	NA	4	In their own bed;On the furniture;On a family member's bed;On the floor	On a family member's bed	Every month	Every day	Every month	At the groomers	Every month	2 hours	6 hours	An equal mixture of the above	Yes, I walk my dog even if it is raining heavily and my dog gets completely wet	10	Bag and bin (specific dog poo bin);Bag and bin (home council bin)	Bag and bin (specific dog poo bin)	No	NA	NA	NA	NA	NA	NA	NA	NA	NA	NA	NA	NA
2020/06/22 12:30:02 PM GMT+1	Dog	Large (20-40kg)	29	4	Yes	To prevent fleas (or other pests)	No	NA	Bravecto tablet;Simparica;Seresto collar	Simparica	6	From a veterinary practice	NA	Yes	Yes	NA	No	No	NA	Yes	March;April;May;June;July;August;September	12	In their own bed;On the furniture;On a family member's bed;On the floor	On the furniture	Every month	Every day	Every 2 weeks	In a bath, sink or shower	Every week or more	1 hour	3 hours	Mainly on unpaved surfaces like field margins, forest tracks or the beach	Yes, I walk my dog even if it is raining heavily and my dog gets completely wet	10	Bag and bin (specific dog poo bin);Bag and bin (home council bin)	Bag and bin (specific dog poo bin)	No	NA	NA	NA	NA	NA	NA	NA	NA	NA	NA	NA	NA
2020/06/22 12:30:20 PM GMT+1	Dog	Medium (10-20 kg)	17	14	Yes	To prevent fleas (or other pests)	No	NA	Bravecto tablet	Bravecto tablet	2	From a veterinary practice	NA	NA	NA	NA	No	Yes	August;September	No	NA	2	In their own bed	On the floor	Every 6 months	Every 2 days	Every 6 months	At the groomers	Every 6 months	30 minutes	30 minutes	Mainly on unpaved surfaces like field margins, forest tracks or the beach	Occasionally, but I try to avoid this	9	Bag and bin (specific dog poo bin);Bag and bin (home council bin)	Bag and bin (specific dog poo bin)	No	NA	NA	NA	NA	NA	NA	NA	NA	NA	NA	NA	NA
2020/06/22 12:30:32 PM GMT+1	Dog	Large (20-40kg)	23	7	Yes	To prevent fleas (or other pests)	No	NA	Bravecto tablet	Bravecto tablet	4	From a veterinary practice	NA	NA	NA	NA	No	No	NA	No	NA	12	In their own bed;On the furniture;On a family member's bed;On the floor	On the furniture	Don't know	Every day	Every 3 months	In a bath, sink or shower	Less than once a year	1 hour	2 hours	An equal mixture of the above	Yes, I walk my dog even if it is raining heavily and my dog gets completely wet	10	Bag and bin (specific dog poo bin);Bag and bin (home council bin)	Bag and bin (specific dog poo bin)	No	NA	NA	NA	NA	NA	NA	NA	NA	NA	NA	NA	NA
2020/06/22 12:31:01 PM GMT+1	Dog	Medium (10-20 kg)	13	1	Yes	To prevent fleas (or other pests)	No	NA	Bravecto tablet	Bravecto tablet	4	From a veterinary practice	NA	NA	NA	NA	No	No	NA	No	NA	4	In their own bed;On the furniture;On the floor;In a crate	In a crate	Every week or more	Every day	Every month	In a bath, sink or shower	Every week or more	1 hour	3 hours	Mainly on unpaved surfaces like field margins, forest tracks or the beach	Yes, I walk my dog even if it is raining heavily and my dog gets completely wet	9	Bag and bin (specific dog poo bin);Bag and bin (home council bin)	Bag and bin (home council bin)	Yes	NA	NA	NA	NA	NA	NA	NA	NA	NA	NA	NA	NA
2020/06/22 12:31:49 PM GMT+1	Cat	NA	NA	NA	NA	NA	NA	NA	NA	NA	NA	NA	NA	NA	NA	NA	NA	NA	NA	NA	NA	NA	NA	NA	NA	NA	NA	NA	NA	NA	NA	NA	NA	NA	NA	NA	NA	Large (above 4 kg)	7	15	Yes	In response to a flea infestation	No	NA	Advocate	Advocate	3	From a veterinary practice	Yes
2020/06/22 12:33:08 PM GMT+1	Cat	NA	NA	NA	NA	NA	NA	NA	NA	NA	NA	NA	NA	NA	NA	NA	NA	NA	NA	NA	NA	NA	NA	NA	NA	NA	NA	NA	NA	NA	NA	NA	NA	NA	NA	NA	NA	Large (above 4 kg)	4.4	2	No	NA	NA	NA	NA	NA	NA	NA	NA
2020/06/22 12:33:18 PM GMT+1	Dog	Medium (10-20 kg)	18	9	Yes	To prevent fleas (or other pests)	No	NA	Bravecto tablet	Bravecto tablet	2	Online	NA	NA	NA	NA	No	No	NA	Yes	April	12	In their own bed;On the floor	In their own bed	Every 3 months	Every day	Every month	In a bath, sink or shower	Every week or more	3 hours	3 hours	Mainly on unpaved surfaces like field margins, forest tracks or the beach	Yes, I walk my dog even if it is raining heavily and my dog gets completely wet	10	Bag and bin (specific dog poo bin)	Bag and bin (specific dog poo bin)	No	NA	NA	NA	NA	NA	NA	NA	NA	NA	NA	NA	NA
2020/06/22 12:34:44 PM GMT+1	Dog	Medium (10-20 kg)	18	4	Yes	To prevent fleas (or other pests)	No	NA	Bravecto tablet;NexGard	Bravecto tablet	4	From a veterinary practice	NA	NA	NA	NA	No	No	NA	No	NA	4	In their own bed;In a crate	In their own bed	Every month	Every day	Every week or more	Outdoors	Every week or more	2 hours	6 hours	Mainly on unpaved surfaces like field margins, forest tracks or the beach	Yes, I walk my dog even if it is raining heavily and my dog gets completely wet	8	Bag and bin (specific dog poo bin)	Bag and bin (specific dog poo bin)	Yes	NA	NA	NA	NA	NA	NA	NA	NA	NA	NA	NA	NA
2020/06/22 12:35:03 PM GMT+1	Dog	Medium (10-20 kg)	14	13	Yes	To prevent fleas (or other pests)	No	NA	Frontline or Frontline Combo spot on	Frontline or Frontline Combo spot on	4	From a supermarket	Yes	Yes	Yes	NA	No	No	NA	Yes	June	4	In their own bed;On a family member's bed;On the floor;In a crate	In their own bed	Every month	Every day	Every 6 months	In a bath, sink or shower	Every 3 months	1 hour	2 hours	Mainly on unpaved surfaces like field margins, forest tracks or the beach	Yes, I will walk my dog in light drizzle	8	Bag and bin (specific dog poo bin);Bag and bin (home council bin);Bury in the ground	Bag and bin (home council bin)	No	NA	NA	NA	NA	NA	NA	NA	NA	NA	NA	NA	NA
2020/06/22 12:36:00 PM GMT+1	Dog	Small (4-10kg)	10	7	Yes	To prevent fleas (or other pests)	No	NA	Bravecto tablet	Bravecto tablet	4	Online	NA	NA	NA	NA	No	No	NA	No	NA	4	In their own bed	In their own bed	Every week or more	Every day	Every 3 months	In a bath, sink or shower	Every week or more	2 hours	2 hours	Mainly on unpaved surfaces like field margins, forest tracks or the beach	Yes, I walk my dog even if it is raining heavily and my dog gets completely wet	7	Bag and bin (specific dog poo bin);Bag and bin (home council bin);Straight in a bin (of any kind)	Straight in a bin (of any kind)	No	NA	NA	NA	NA	NA	NA	NA	NA	NA	NA	NA	NA
2020/06/22 12:41:22 PM GMT+1	Dog	Medium (10-20 kg)	17.5	9	Yes	To prevent fleas (or other pests)	No	NA	NexGard;NexGard Spectra	NexGard Spectra	9	Online	Yes	Yes	Yes	NA	No	No	NA	Yes	June	8	In their own bed;On the floor	In their own bed	Every 2 weeks	Every day	Every 6 months	In a bath, sink or shower	Less than once a year	1 hour	6 hours	Mainly on unpaved surfaces like field margins, forest tracks or the beach	Yes, I walk my dog even if it is raining heavily and my dog gets completely wet	3	Bag and bin (specific dog poo bin)	None of the above/don't know	No	NA	NA	NA	NA	NA	NA	NA	NA	NA	NA	NA	NA
2020/06/22 12:41:53 PM GMT+1	Dog	Extra large (over 40 kg)	60	11	Yes	To prevent fleas (or other pests)	No	NA	Advantage;NexGard Spectra	NexGard Spectra	3	From a veterinary practice	NA	NA	NA	NA	No	No	NA	No	NA	3	In their own bed;On the furniture;On the floor;Outdoors kennel/building	Outdoors kennel/building	Every 2 weeks	Every day	Every 3 months	At the groomers	Never	30 minutes	12 hours	Mainly on unpaved surfaces like field margins, forest tracks or the beach	Yes, I will walk my dog in light drizzle	10	None of the above/don't know	None of the above/don't know	No	NA	NA	NA	NA	NA	NA	NA	NA	NA	NA	NA	NA
2020/06/22 12:42:17 PM GMT+1	Cat	NA	NA	NA	NA	NA	NA	NA	NA	NA	NA	NA	NA	NA	NA	NA	NA	NA	NA	NA	NA	NA	NA	NA	NA	NA	NA	NA	NA	NA	NA	NA	NA	NA	NA	NA	NA	Small (below 4kg)	3.5	13	Yes	To prevent fleas (or other pests)	No	NA	Bravecto	Bravecto	3	From a veterinary practice	Yes
2020/06/22 12:43:34 PM GMT+1	Cat	NA	NA	NA	NA	NA	NA	NA	NA	NA	NA	NA	NA	NA	NA	NA	NA	NA	NA	NA	NA	NA	NA	NA	NA	NA	NA	NA	NA	NA	NA	NA	NA	NA	NA	NA	NA	Large (above 4 kg)	5	5	Yes	To prevent fleas (or other pests)	No	NA	Advantage	Advantage	12	From a petshop	Yes
2020/06/22 12:43:35 PM GMT+1	Dog	Medium (10-20 kg)	18	4	Yes	To prevent fleas (or other pests)	No	NA	NexGard	NexGard	12	From a veterinary practice	NA	NA	NA	NA	No	No	NA	No	NA	3	In their own bed;On the furniture;On the floor;In a crate	On the furniture	Don't know	Every day	Every 3 months	At the groomers	Every month	1 hour	3 hours	An equal mixture of the above	Occasionally, but I try to avoid this	10	Bag and bin (specific dog poo bin);Bag and bin (home council bin)	Bag and bin (specific dog poo bin)	No	NA	NA	NA	NA	NA	NA	NA	NA	NA	NA	NA	NA
2020/06/22 12:45:33 PM GMT+1	Dog	Large (20-40kg)	26	2	Yes	To prevent fleas (or other pests)	No	NA	Advocate;Bravecto tablet	Bravecto tablet	3	From a veterinary practice	NA	Yes	Yes	NA	No	No	NA	No	NA	4	On the furniture;On the floor	On the furniture	Every week or more	Every day	Every month	In a bath, sink or shower	Every week or more	2 hours	2 hours	Mainly on unpaved surfaces like field margins, forest tracks or the beach	Yes, I walk my dog even if it is raining heavily and my dog gets completely wet	9	Bag and bin (home council bin)	Bag and bin (home council bin)	No	NA	NA	NA	NA	NA	NA	NA	NA	NA	NA	NA	NA
2020/06/22 12:47:11 PM GMT+1	Dog	Medium (10-20 kg)	14	6	Yes	To prevent fleas (or other pests)	No	NA	Advantage	Advantage	12	Online	Yes	Yes	Yes	NA	No	No	NA	No	NA	4	In their own bed;On the furniture	In their own bed	Every 6 months	Every 2 days	Every 3 months	In a bath, sink or shower	Never	30 minutes	1 hour	Mainly on paved surfaces	Occasionally, but I try to avoid this	10	Bag and bin (specific dog poo bin);Bag and bin (home council bin)	Bag and bin (home council bin)	No	NA	NA	NA	NA	NA	NA	NA	NA	NA	NA	NA	NA
2020/06/22 12:47:36 PM GMT+1	Cat	NA	NA	NA	NA	NA	NA	NA	NA	NA	NA	NA	NA	NA	NA	NA	NA	NA	NA	NA	NA	NA	NA	NA	NA	NA	NA	NA	NA	NA	NA	NA	NA	NA	NA	NA	NA	Large (above 4 kg)	5	13	Yes	In response to a flea infestation	No	NA	Advocate;Bob Martin Clear / Clear Plus (Fipronil);Frontline or Frontline Combo	Advocate	4	From a veterinary practice	Yes
2020/06/22 12:48:54 PM GMT+1	Dog	Small (4-10kg)	9	2	No	NA	NA	NA	NA	NA	NA	NA	NA	NA	NA	NA	No	No	NA	No	NA	1	In their own bed;On the furniture;On a family member's bed	On a family member's bed	Every month	Every day	Every 6 months	In a bath, sink or shower	Every 6 months	1 hour	2 hours	Mainly on unpaved surfaces like field margins, forest tracks or the beach	Yes, I walk my dog even if it is raining heavily and my dog gets completely wet	5	Bag and bin (specific dog poo bin);Bag and bin (home council bin)	Bag and bin (home council bin)	No	NA	NA	NA	NA	NA	NA	NA	NA	NA	NA	NA	NA
2020/06/22 12:49:15 PM GMT+1	Dog	Medium (10-20 kg)	15	2	Yes	To prevent fleas (or other pests)	No	NA	NexGard;NexGard Spectra	NexGard Spectra	12	From a veterinary practice	NA	NA	NA	NA	No	No	NA	Yes	January;February;May;June;November;December	12	In their own bed;Outdoors kennel/building	In their own bed	Every 3 months	Every day	Less than once a year	Outdoors	Every 2 weeks	2 hours	12 hours	Mainly on unpaved surfaces like field margins, forest tracks or the beach	Yes, I walk my dog even if it is raining heavily and my dog gets completely wet	6	Bag and bin (specific dog poo bin);Bag and bin (home council bin);Flush down the toilet	Bag and bin (specific dog poo bin)	Yes	NA	NA	NA	NA	NA	NA	NA	NA	NA	NA	NA	NA
2020/06/22 12:49:19 PM GMT+1	Dog	Medium (10-20 kg)	17	6	Yes	To prevent fleas (or other pests)	No	NA	NexGard	NexGard	4	From a veterinary practice	NA	NA	NA	NA	Yes	Yes	May	No	NA	4	In their own bed;On the furniture;On the floor;In a crate	In a crate	Every 3 months	Every day	Every week or more	Outdoors	Every month	1 hour	3 hours	Mainly on unpaved surfaces like field margins, forest tracks or the beach	Yes, I walk my dog even if it is raining heavily and my dog gets completely wet	8	Bag and bin (specific dog poo bin);Flush down the toilet	Bag and bin (specific dog poo bin)	No	NA	NA	NA	NA	NA	NA	NA	NA	NA	NA	NA	NA
2020/06/22 12:50:03 PM GMT+1	Dog	Small (4-10kg)	8	2	Yes	In response to other pests (eg ticks)	No	NA	NexGard Spectra	NexGard Spectra	4	From a veterinary practice	NA	NA	NA	NA	No	No	NA	Yes	August	9	In their own bed;On the furniture;On a family member's bed;On the floor	On a family member's bed	Every month	Every day	Every month	In a bath, sink or shower	Never	1 hour	2 hours	Mainly on unpaved surfaces like field margins, forest tracks or the beach	Occasionally, but I try to avoid this	10	Bag and bin (specific dog poo bin);Bag and bin (home council bin)	Bag and bin (home council bin)	No	NA	NA	NA	NA	NA	NA	NA	NA	NA	NA	NA	NA
2020/06/22 12:51:13 PM GMT+1	Dog	Large (20-40kg)	26	3	Yes	In response to other pests (eg ticks)	No	NA	NexGard Spectra	NexGard Spectra	12	From a veterinary practice	NA	NA	NA	NA	No	No	NA	No	NA	12	In their own bed;On the furniture;On a family member's bed;On the floor	In their own bed	Every month	Every day	Every month	In a bath, sink or shower	Never	1 hour	1 hour	An equal mixture of the above	Yes, I walk my dog even if it is raining heavily and my dog gets completely wet	10	Bag and bin (specific dog poo bin);Bag and bin (home council bin)	Bag and bin (home council bin)	No	NA	NA	NA	NA	NA	NA	NA	NA	NA	NA	NA	NA
2020/06/22 12:51:46 PM GMT+1	Cat	NA	NA	NA	NA	NA	NA	NA	NA	NA	NA	NA	NA	NA	NA	NA	NA	NA	NA	NA	NA	NA	NA	NA	NA	NA	NA	NA	NA	NA	NA	NA	NA	NA	NA	NA	NA	Small (below 4kg)	3	5	Yes	To prevent fleas (or other pests)	No	NA	Stronghold	Stronghold	6	From a veterinary practice	Yes
2020/06/22 12:52:03 PM GMT+1	Dog	Medium (10-20 kg)	13	3	Yes	In response to other pests (eg ticks)	No	NA	Bravecto tablet	Bravecto tablet	3	From a veterinary practice	NA	NA	NA	NA	No	No	NA	Yes	April;May;June;July;August;September	1	In their own bed;On the furniture;On the floor	On the floor	Never	Every day	Once a year	In a bath, sink or shower	Never	1 hour	2 hours	Mainly on unpaved surfaces like field margins, forest tracks or the beach	Yes, I walk my dog even if it is raining heavily and my dog gets completely wet	9	Bag and bin (specific dog poo bin);Bag and bin (home council bin)	Bag and bin (home council bin)	No	NA	NA	NA	NA	NA	NA	NA	NA	NA	NA	NA	NA
2020/06/22 12:52:38 PM GMT+1	Dog	Medium (10-20 kg)	16	1	Yes	In response to a flea infestation	No	NA	Frontline generic	Frontline generic	2	Online	Yes	Yes	Yes	NA	Yes	Yes	May	No	NA	2	In their own bed;In a crate	In a crate	Every month	Every day	Every 3 months	In a bath, sink or shower	Every 3 months	1 hour	3 hours	Mainly on unpaved surfaces like field margins, forest tracks or the beach	Yes, I walk my dog even if it is raining heavily and my dog gets completely wet	10	Bag and bin (specific dog poo bin);Bag and bin (home council bin)	Bag and bin (home council bin)	No	NA	NA	NA	NA	NA	NA	NA	NA	NA	NA	NA	NA
2020/06/22 12:53:26 PM GMT+1	Cat	NA	NA	NA	NA	NA	NA	NA	NA	NA	NA	NA	NA	NA	NA	NA	NA	NA	NA	NA	NA	NA	NA	NA	NA	NA	NA	NA	NA	NA	NA	NA	NA	NA	NA	NA	NA	Large (above 4 kg)	4.1	11	Yes	To prevent fleas (or other pests)	No	NA	Advocate	Advocate	8	From a veterinary practice	Yes
2020/06/22 12:55:08 PM GMT+1	Cat	NA	NA	NA	NA	NA	NA	NA	NA	NA	NA	NA	NA	NA	NA	NA	NA	NA	NA	NA	NA	NA	NA	NA	NA	NA	NA	NA	NA	NA	NA	NA	NA	NA	NA	NA	NA	Small (below 4kg)	NA	11	Yes	In response to a flea infestation	No	NA	Activyl;Seresto collar	Seresto collar	3	From a veterinary practice	No
2020/06/22 12:55:12 PM GMT+1	Cat	NA	NA	NA	NA	NA	NA	NA	NA	NA	NA	NA	NA	NA	NA	NA	NA	NA	NA	NA	NA	NA	NA	NA	NA	NA	NA	NA	NA	NA	NA	NA	NA	NA	NA	NA	NA	Small (below 4kg)	3.4	2	Yes	To prevent fleas (or other pests)	No	NA	Bravecto	Bravecto	4	From a veterinary practice	No
2020/06/22 12:57:57 PM GMT+1	Dog	Extra large (over 40 kg)	42	2	Yes	To prevent fleas (or other pests)	No	NA	NexGard	NexGard	11	Online	NA	NA	NA	NA	No	No	NA	No	NA	11	On the floor	On the floor	Every 3 months	Every day	Every 6 months	Outdoors	Every 3 months	2 hours	3 hours	Mainly on unpaved surfaces like field margins, forest tracks or the beach	Yes, I walk my dog even if it is raining heavily and my dog gets completely wet	10	Bag and bin (home council bin)	Bag and bin (home council bin)	No	NA	NA	NA	NA	NA	NA	NA	NA	NA	NA	NA	NA
2020/06/22 12:58:11 PM GMT+1	Dog	Extra large (over 40 kg)	41.7	5	Yes	To prevent fleas (or other pests)	No	NA	Advantage;Bravecto tablet	Bravecto tablet	4	From a veterinary practice	NA	NA	NA	NA	No	No	NA	No	NA	10	In their own bed;On the furniture;On a family member's bed;On the floor	On the furniture	Don't know	Every day	Every 3 months	In a bath, sink or shower	Every 6 months	1 hour	2 hours	An equal mixture of the above	Yes, I will walk my dog in light drizzle	10	Bag and bin (specific dog poo bin);Bag and bin (home council bin);Straight in a bin (of any kind)	Bag and bin (home council bin)	No	NA	NA	NA	NA	NA	NA	NA	NA	NA	NA	NA	NA
2020/06/22 12:58:44 PM GMT+1	Cat	NA	NA	NA	NA	NA	NA	NA	NA	NA	NA	NA	NA	NA	NA	NA	NA	NA	NA	NA	NA	NA	NA	NA	NA	NA	NA	NA	NA	NA	NA	NA	NA	NA	NA	NA	NA	Large (above 4 kg)	4.5	2	Yes	To prevent fleas (or other pests)	No	NA	Comfortis	Comfortis	3	None of the above	NA
2020/06/22 12:59:28 PM GMT+1	Dog	Medium (10-20 kg)	20	4	Yes	To prevent fleas (or other pests)	No	NA	Frontline or Frontline Combo spot on	Frontline or Frontline Combo spot on	6	Online	Yes	Yes	Yes	NA	No	No	NA	No	NA	4	In their own bed;On the furniture;On a family member's bed;On the floor;In a crate	In their own bed	Every 3 months	Every day	Every 3 months	In a bath, sink or shower	Every 6 months	1 hour	2 hours	An equal mixture of the above	Yes, I will walk my dog in light drizzle	10	Bag and bin (specific dog poo bin);Bag and bin (home council bin)	Bag and bin (specific dog poo bin)	No	NA	NA	NA	NA	NA	NA	NA	NA	NA	NA	NA	NA
2020/06/22 1:00:35 PM GMT+1	Dog	Large (20-40kg)	26.8	13	Yes	To prevent fleas (or other pests)	No	NA	Bravecto tablet	Bravecto tablet	3	Online	NA	NA	NA	NA	Yes	No	NA	No	NA	12	In their own bed;On the furniture;On a family member's bed;On the floor	On the furniture	Every 2 weeks	Every day	Every 3 months	In a bath, sink or shower	Every month	1 hour	6 hours	Mainly on unpaved surfaces like field margins, forest tracks or the beach	Occasionally, but I try to avoid this	10	Bag and bin (specific dog poo bin);Bag and bin (home council bin)	Bag and bin (home council bin)	No	NA	NA	NA	NA	NA	NA	NA	NA	NA	NA	NA	NA
2020/06/22 1:01:58 PM GMT+1	Cat	NA	NA	NA	NA	NA	NA	NA	NA	NA	NA	NA	NA	NA	NA	NA	NA	NA	NA	NA	NA	NA	NA	NA	NA	NA	NA	NA	NA	NA	NA	NA	NA	NA	NA	NA	NA	Large (above 4 kg)	6	9	Yes	To prevent fleas (or other pests)	No	NA	Stronghold	Stronghold	12	From a veterinary practice	Yes
2020/06/22 1:03:08 PM GMT+1	Dog	Large (20-40kg)	26	5	Yes	To prevent fleas (or other pests)	No	NA	Bravecto tablet	Bravecto tablet	4	From a veterinary practice	NA	NA	NA	NA	No	No	NA	No	NA	4	In their own bed	In their own bed	Every month	Every day	Every 6 months	In a bath, sink or shower	Never	1 hour	Don't know	Mainly on paved surfaces	Yes, I will walk my dog in light drizzle	10	Bag and bin (home council bin)	Bag and bin (home council bin)	No	NA	NA	NA	NA	NA	NA	NA	NA	NA	NA	NA	NA
2020/06/22 1:03:20 PM GMT+1	Cat	NA	NA	NA	NA	NA	NA	NA	NA	NA	NA	NA	NA	NA	NA	NA	NA	NA	NA	NA	NA	NA	NA	NA	NA	NA	NA	NA	NA	NA	NA	NA	NA	NA	NA	NA	NA	Large (above 4 kg)	5	13	Yes	In response to a flea infestation	No	NA	Frontline or Frontline Combo	Frontline or Frontline Combo	1	From a petshop	No
2020/06/22 1:04:37 PM GMT+1	Cat	NA	NA	NA	NA	NA	NA	NA	NA	NA	NA	NA	NA	NA	NA	NA	NA	NA	NA	NA	NA	NA	NA	NA	NA	NA	NA	NA	NA	NA	NA	NA	NA	NA	NA	NA	NA	Large (above 4 kg)	4.5	4	Yes	To prevent fleas (or other pests)	No	NA	Seresto collar	Seresto collar	2	Online	NA
2020/06/22 1:05:05 PM GMT+1	Dog	Medium (10-20 kg)	16	2	Yes	To prevent fleas (or other pests)	No	NA	Advocate	Advocate	12	Online	Yes	Yes	Yes	NA	No	No	NA	Yes	April;May;June;July	12	In a crate	In a crate	Every 2 weeks	Every day	Every week or more	Outdoors	Every week or more	3 hours	6 hours	Mainly on unpaved surfaces like field margins, forest tracks or the beach	Yes, I walk my dog even if it is raining heavily and my dog gets completely wet	10	Bag and bin (specific dog poo bin);Bag and bin (home council bin)	Bag and bin (specific dog poo bin)	No	NA	NA	NA	NA	NA	NA	NA	NA	NA	NA	NA	NA
2020/06/22 1:06:29 PM GMT+1	Cat	NA	NA	NA	NA	NA	NA	NA	NA	NA	NA	NA	NA	NA	NA	NA	NA	NA	NA	NA	NA	NA	NA	NA	NA	NA	NA	NA	NA	NA	NA	NA	NA	NA	NA	NA	NA	Small (below 4kg)	3.5	5	Yes	To prevent fleas (or other pests)	No	NA	Stronghold	Stronghold	1	From a veterinary practice	Yes
2020/06/22 1:07:09 PM GMT+1	Dog	Large (20-40kg)	23	1	Yes	To prevent fleas (or other pests)	No	NA	Bravecto tablet	Bravecto tablet	5	From a veterinary practice	No	NA	NA	NA	No	No	NA	No	NA	12	In their own bed;On the floor;In a crate	In a crate	Every 2 weeks	Every day	Every week or more	Outdoors	Every week or more	2 hours	3 hours	Mainly on unpaved surfaces like field margins, forest tracks or the beach	Yes, I walk my dog even if it is raining heavily and my dog gets completely wet	10	Bag and bin (specific dog poo bin);Bag and bin (home council bin)	Bag and bin (home council bin)	No	NA	NA	NA	NA	NA	NA	NA	NA	NA	NA	NA	NA
2020/06/22 1:08:28 PM GMT+1	Dog	Large (20-40kg)	26	1	Yes	To prevent fleas (or other pests)	No	NA	Advocate;NexGard Spectra	NexGard Spectra	12	From a veterinary practice	NA	NA	NA	NA	No	No	NA	No	NA	12	In their own bed;On a family member's bed	In their own bed	Every 2 weeks	Every day	Every month	Outdoors	Every week or more	2 hours	6 hours	Mainly on unpaved surfaces like field margins, forest tracks or the beach	Yes, I walk my dog even if it is raining heavily and my dog gets completely wet	10	Bag and bin (specific dog poo bin);Bag and bin (home council bin)	Bag and bin (specific dog poo bin)	No	NA	NA	NA	NA	NA	NA	NA	NA	NA	NA	NA	NA
2020/06/22 1:08:31 PM GMT+1	Dog	Small (4-10kg)	8	12	Yes	To prevent fleas (or other pests)	No	NA	Advocate	Advocate	12	From a veterinary practice	Yes	Yes	Yes	NA	No	No	NA	No	NA	3	In their own bed;On the furniture;On the floor;In a crate	In their own bed	Every 3 months	Every day	Every 3 months	In a bath, sink or shower	Never	1 hour	2 hours	Mainly on paved surfaces	Occasionally, but I try to avoid this	10	Bag and bin (specific dog poo bin);Bag and bin (home council bin);Straight in a bin (of any kind)	Bag and bin (home council bin)	No	NA	NA	NA	NA	NA	NA	NA	NA	NA	NA	NA	NA
2020/06/22 1:08:56 PM GMT+1	Dog	Miniature (< 4 kg)	3.7	7	Yes	To prevent fleas (or other pests)	No	NA	NexGard Spectra	NexGard Spectra	8	From a veterinary practice	NA	NA	NA	NA	No	No	NA	No	NA	8	On a family member's bed	On the furniture	Every week or more	Every day	Every week or more	In a bath, sink or shower	Never	1 hour	3 hours	An equal mixture of the above	Yes, I will walk my dog in light drizzle	10	Bag and bin (specific dog poo bin);Bag and bin (home council bin)	Bag and bin (specific dog poo bin)	No	NA	NA	NA	NA	NA	NA	NA	NA	NA	NA	NA	NA
2020/06/22 1:09:18 PM GMT+1	Dog	Large (20-40kg)	NA	3	Yes	Other reason	No	NA	Don't know	Don't know	1	From a veterinary practice	Yes	NA	No	NA	Don't know	No	NA	Yes	Don't know	1	In their own bed	In their own bed	Every month	Every day	Never	Outdoors	Every week or more	2 hours	3 hours	Mainly on unpaved surfaces like field margins, forest tracks or the beach	Yes, I walk my dog even if it is raining heavily and my dog gets completely wet	6	Bag and bin (specific dog poo bin);Bag and bin (home council bin);Bury in the ground	Bag and bin (home council bin)	No	NA	NA	NA	NA	NA	NA	NA	NA	NA	NA	NA	NA
2020/06/22 1:09:55 PM GMT+1	Dog	Large (20-40kg)	22	2	Yes	In response to other pests (eg ticks)	No	NA	Frontline or Frontline Combo spot on	Frontline or Frontline Combo spot on	1	Online	Don't know	Yes	Yes	NA	No	No	NA	Yes	April	4	In their own bed;On the furniture;On the floor	In their own bed	Every month	Every day	Every 3 months	In a bath, sink or shower	Less than once a year	1 hour	6 hours	An equal mixture of the above	Occasionally, but I try to avoid this	9	Bag and bin (specific dog poo bin);Bag and bin (home council bin)	Bag and bin (specific dog poo bin)	No	NA	NA	NA	NA	NA	NA	NA	NA	NA	NA	NA	NA
2020/06/22 1:11:05 PM GMT+1	Dog	Small (4-10kg)	10	1	Yes	To prevent fleas (or other pests)	No	NA	Bravecto tablet	Bravecto tablet	4	From a veterinary practice	NA	Yes	Yes	NA	No	No	NA	No	NA	12	In their own bed;On the furniture;On the floor	On the floor	Every week or more	Every day	Every month	In a bath, sink or shower	Every week or more	2 hours	3 hours	Mainly on unpaved surfaces like field margins, forest tracks or the beach	Yes, I will walk my dog in light drizzle	8	Bag and bin (specific dog poo bin);Bag and bin (home council bin)	Bag and bin (specific dog poo bin)	No	NA	NA	NA	NA	NA	NA	NA	NA	NA	NA	NA	NA
2020/06/22 1:11:19 PM GMT+1	Cat	NA	NA	NA	NA	NA	NA	NA	NA	NA	NA	NA	NA	NA	NA	NA	NA	NA	NA	NA	NA	NA	NA	NA	NA	NA	NA	NA	NA	NA	NA	NA	NA	NA	NA	NA	NA	Large (above 4 kg)	5	8	Yes	To prevent fleas (or other pests)	No	NA	Bravecto	Bravecto	1	From a veterinary practice	Yes
2020/06/22 1:11:34 PM GMT+1	Dog	Medium (10-20 kg)	18	10	Yes	To prevent fleas (or other pests)	No	NA	Bravecto tablet;Seresto collar	Seresto collar	5	From a veterinary practice	NA	NA	NA	NA	No	No	NA	Yes	May;June;July	12	In their own bed;On the floor	In their own bed	Every 2 weeks	Every day	Every 2 weeks	Outdoors	Every 2 weeks	2 hours	3 hours	Mainly on unpaved surfaces like field margins, forest tracks or the beach	Yes, I walk my dog even if it is raining heavily and my dog gets completely wet	10	Bag and bin (specific dog poo bin);Bag and bin (home council bin)	Bag and bin (home council bin)	No	NA	NA	NA	NA	NA	NA	NA	NA	NA	NA	NA	NA
2020/06/22 1:12:26 PM GMT+1	Cat	NA	NA	NA	NA	NA	NA	NA	NA	NA	NA	NA	NA	NA	NA	NA	NA	NA	NA	NA	NA	NA	NA	NA	NA	NA	NA	NA	NA	NA	NA	NA	NA	NA	NA	NA	NA	Large (above 4 kg)	NA	10	Yes	To prevent fleas (or other pests)	No	NA	Advocate;Stronghold	Advocate	12	From a veterinary practice	Yes
2020/06/22 1:13:01 PM GMT+1	Dog	Miniature (< 4 kg)	2.5	2	Yes	In response to other pests (eg ticks)	No	NA	Seresto collar	Seresto collar	1	From a veterinary practice	NA	Yes	Yes	NA	No	No	NA	Yes	April	3	In a crate	In a crate	Every 3 months	Every day	Every 6 months	In a bath, sink or shower	Never	1 hour	3 hours	Mainly on unpaved surfaces like field margins, forest tracks or the beach	Yes, I walk my dog even if it is raining heavily and my dog gets completely wet	9	Bag and bin (specific dog poo bin);Bag and bin (home council bin);Straight in a bin (of any kind)	Bag and bin (specific dog poo bin)	No	NA	NA	NA	NA	NA	NA	NA	NA	NA	NA	NA	NA
2020/06/22 1:13:34 PM GMT+1	Dog	Medium (10-20 kg)	13	2	Yes	To prevent fleas (or other pests)	No	NA	Bravecto tablet;Imidacloprid/Imidaflea/Imidaspot	Bravecto tablet	12	From a veterinary practice	Yes	Yes	Yes	NA	No	No	NA	No	NA	12	In their own bed	In their own bed	Every 3 months	Every day	Every month	In a bath, sink or shower	Every 3 months	30 minutes	1 hour	An equal mixture of the above	Occasionally, but I try to avoid this	10	Bag and bin (specific dog poo bin);Bag and bin (home council bin);Straight in a bin (of any kind)	Bag and bin (home council bin)	No	NA	NA	NA	NA	NA	NA	NA	NA	NA	NA	NA	NA
2020/06/22 1:13:36 PM GMT+1	Cat	NA	NA	NA	NA	NA	NA	NA	NA	NA	NA	NA	NA	NA	NA	NA	NA	NA	NA	NA	NA	NA	NA	NA	NA	NA	NA	NA	NA	NA	NA	NA	NA	NA	NA	NA	NA	Small (below 4kg)	NA	17	Yes	To prevent fleas (or other pests)	No	NA	Bob Martin Clear / Clear Plus (Fipronil)	Bob Martin Clear / Clear Plus (Fipronil)	1	Online	No
2020/06/22 1:13:46 PM GMT+1	Dog	Medium (10-20 kg)	15	9	Yes	In response to other pests (eg ticks)	No	NA	Bravecto tablet	Bravecto tablet	3	From a veterinary practice	NA	NA	NA	NA	No	No	NA	Yes	August;September	2	In their own bed;On the furniture;On a family member's bed;On the floor;In a crate	In a crate	Every 3 months	Every day	Never	NA	Every 2 weeks	30 minutes	2 hours	Mainly on unpaved surfaces like field margins, forest tracks or the beach	Occasionally, but I try to avoid this	7	Bag and bin (specific dog poo bin);Bag and bin (home council bin)	Bag and bin (specific dog poo bin)	No	NA	NA	NA	NA	NA	NA	NA	NA	NA	NA	NA	NA
2020/06/22 1:14:36 PM GMT+1	Dog	Medium (10-20 kg)	13	7	Yes	To prevent fleas (or other pests)	No	NA	NexGard Spectra	NexGard Spectra	9	From a veterinary practice	NA	NA	NA	NA	No	No	NA	Yes	May;June	3	In their own bed;On the furniture;On the floor	In their own bed	Every 3 months	Every day	Every month	In a bath, sink or shower	Every 2 weeks	1 hour	1 hour	An equal mixture of the above	Yes, I walk my dog even if it is raining heavily and my dog gets completely wet	9	Bag and bin (specific dog poo bin);Bag and bin (home council bin)	Bag and bin (specific dog poo bin)	No	NA	NA	NA	NA	NA	NA	NA	NA	NA	NA	NA	NA
2020/06/22 1:15:25 PM GMT+1	Dog	Large (20-40kg)	32	7	Yes	To prevent fleas (or other pests)	No	NA	Simparica	Simparica	12	From a veterinary practice	NA	NA	NA	NA	No	No	NA	No	NA	12	In their own bed;On the floor	In their own bed	Every month	Every day	Every 6 months	Outdoors	Every week or more	1 hour	3 hours	An equal mixture of the above	Yes, I will walk my dog in light drizzle	10	Bag and bin (specific dog poo bin)	Bag and bin (specific dog poo bin)	No	NA	NA	NA	NA	NA	NA	NA	NA	NA	NA	NA	NA
2020/06/22 1:16:25 PM GMT+1	Cat	NA	NA	NA	NA	NA	NA	NA	NA	NA	NA	NA	NA	NA	NA	NA	NA	NA	NA	NA	NA	NA	NA	NA	NA	NA	NA	NA	NA	NA	NA	NA	NA	NA	NA	NA	NA	Large (above 4 kg)	NA	7	Yes	To prevent fleas (or other pests)	No	NA	Credelio	Credelio	4	From a veterinary practice	Yes
2020/06/22 1:16:29 PM GMT+1	Cat	NA	NA	NA	NA	NA	NA	NA	NA	NA	NA	NA	NA	NA	NA	NA	NA	NA	NA	NA	NA	NA	NA	NA	NA	NA	NA	NA	NA	NA	NA	NA	NA	NA	NA	NA	NA	Large (above 4 kg)	4.5	5	Yes	To prevent fleas (or other pests)	No	NA	Bravecto	Bravecto	4	From a veterinary practice	Yes
2020/06/22 1:17:49 PM GMT+1	Dog	Large (20-40kg)	23	2	Yes	To prevent fleas (or other pests)	No	NA	Bravecto tablet	Bravecto tablet	3	Online	Don't know	NA	NA	NA	Don't know	No	NA	No	NA	3	In their own bed;On the furniture;On the floor	On the furniture	Every 3 months	Every day	Every 2 weeks	Outdoors	Every week or more	2 hours	6 hours	Mainly on unpaved surfaces like field margins, forest tracks or the beach	Yes, I walk my dog even if it is raining heavily and my dog gets completely wet	3	Bag and bin (specific dog poo bin);Bag and bin (home council bin);Straight in a bin (of any kind)	Bag and bin (specific dog poo bin)	No	NA	NA	NA	NA	NA	NA	NA	NA	NA	NA	NA	NA
2020/06/22 1:21:27 PM GMT+1	Dog	Small (4-10kg)	10	5	Yes	To prevent fleas (or other pests)	No	NA	Don't know	Don't know	Don't know	From a veterinary practice	NA	NA	NA	NA	No	No	NA	No	NA	Don't know	On a family member's bed	On a family member's bed	Every 6 months	Every day	Every month	In a bath, sink or shower	Never	1 hour	1 hour	An equal mixture of the above	Yes, I will walk my dog in light drizzle	9	Bag and bin (specific dog poo bin);Bag and bin (home council bin);Straight in a bin (of any kind)	Bag and bin (home council bin)	No	NA	NA	NA	NA	NA	NA	NA	NA	NA	NA	NA	NA
2020/06/22 1:24:35 PM GMT+1	Cat	NA	NA	NA	NA	NA	NA	NA	NA	NA	NA	NA	NA	NA	NA	NA	NA	NA	NA	NA	NA	NA	NA	NA	NA	NA	NA	NA	NA	NA	NA	NA	NA	NA	NA	NA	NA	Small (below 4kg)	3.2	8	Yes	To prevent fleas (or other pests)	No	NA	Advocate	Advocate	12	From a veterinary practice	No
2020/06/22 1:25:01 PM GMT+1	Dog	Small (4-10kg)	8	8	Yes	To prevent fleas (or other pests)	No	NA	Simparica	Simparica	12	From a veterinary practice	NA	NA	NA	NA	No	No	NA	No	NA	4	In their own bed;On the floor;In a crate	In a crate	Every month	Every week	Every 6 months	In a bath, sink or shower	Every week or more	1 hour	2 hours	Mainly on unpaved surfaces like field margins, forest tracks or the beach	Yes, I walk my dog even if it is raining heavily and my dog gets completely wet	10	Bag and bin (specific dog poo bin);Bag and bin (home council bin)	Bag and bin (home council bin)	No	NA	NA	NA	NA	NA	NA	NA	NA	NA	NA	NA	NA
2020/06/22 1:26:10 PM GMT+1	Dog	Small (4-10kg)	8	5	Yes	To prevent fleas (or other pests)	No	NA	Bravecto spot on;Effipro Spot On	Bravecto spot on	4	From a veterinary practice	No	Yes	Yes	NA	Yes	No	NA	No	NA	4	On the furniture;On a family member's bed;On the floor	On a family member's bed	Every 2 weeks	Every day	Every month	In a bath, sink or shower	Never	2 hours	3 hours	Mainly on paved surfaces	Yes, I will walk my dog in light drizzle	9	Bag and bin (specific dog poo bin)	Bag and bin (specific dog poo bin)	No	NA	NA	NA	NA	NA	NA	NA	NA	NA	NA	NA	NA
2020/06/22 1:26:55 PM GMT+1	Cat	NA	NA	NA	NA	NA	NA	NA	NA	NA	NA	NA	NA	NA	NA	NA	NA	NA	NA	NA	NA	NA	NA	NA	NA	NA	NA	NA	NA	NA	NA	NA	NA	NA	NA	NA	NA	Small (below 4kg)	3.5	11	Yes	To prevent fleas (or other pests)	No	NA	Stronghold	Stronghold	8	From a veterinary practice	Yes
2020/06/22 1:27:56 PM GMT+1	Dog	Large (20-40kg)	25	13	No	NA	NA	NA	NA	NA	NA	NA	NA	NA	NA	NA	No	No	NA	No	NA	None	In their own bed;On the floor	On the floor	Every 2 weeks	Never	Every week or more	Outdoors	Every week or more	1 hour	2 hours	An equal mixture of the above	Yes, I walk my dog even if it is raining heavily and my dog gets completely wet	9	Bag and bin (specific dog poo bin);Bag and bin (home council bin)	Bag and bin (specific dog poo bin)	No	NA	NA	NA	NA	NA	NA	NA	NA	NA	NA	NA	NA
2020/06/22 1:30:31 PM GMT+1	Dog	Small (4-10kg)	6	12	Yes	To prevent fleas (or other pests)	No	NA	Bravecto tablet	Bravecto tablet	4	From a veterinary practice	NA	NA	NA	NA	No	No	NA	No	NA	10	In their own bed;On the furniture;On a family member's bed;On the floor	On a family member's bed	Every 3 months	Every 2 days	Every 3 months	In a bath, sink or shower	Never	1 hour	2 hours	Mainly on unpaved surfaces like field margins, forest tracks or the beach	Yes, I will walk my dog in light drizzle	10	Bag and bin (specific dog poo bin)	Bag and bin (specific dog poo bin)	No	NA	NA	NA	NA	NA	NA	NA	NA	NA	NA	NA	NA
2020/06/22 1:33:56 PM GMT+1	Cat	NA	NA	NA	NA	NA	NA	NA	NA	NA	NA	NA	NA	NA	NA	NA	NA	NA	NA	NA	NA	NA	NA	NA	NA	NA	NA	NA	NA	NA	NA	NA	NA	NA	NA	NA	NA	Large (above 4 kg)	6	7	Yes	In response to a flea infestation	No	NA	Stronghold	Stronghold	2	From a veterinary practice	No
2020/06/22 1:34:38 PM GMT+1	Cat	NA	NA	NA	NA	NA	NA	NA	NA	NA	NA	NA	NA	NA	NA	NA	NA	NA	NA	NA	NA	NA	NA	NA	NA	NA	NA	NA	NA	NA	NA	NA	NA	NA	NA	NA	NA	Large (above 4 kg)	4	13	Yes	To prevent fleas (or other pests)	No	NA	Advocate	Advocate	8	From a veterinary practice	Yes
2020/06/22 1:36:02 PM GMT+1	Cat	NA	NA	NA	NA	NA	NA	NA	NA	NA	NA	NA	NA	NA	NA	NA	NA	NA	NA	NA	NA	NA	NA	NA	NA	NA	NA	NA	NA	NA	NA	NA	NA	NA	NA	NA	NA	Large (above 4 kg)	5	6	Yes	To prevent fleas (or other pests)	No	NA	Bravecto	Bravecto	2	From a veterinary practice	Yes
2020/06/22 1:39:54 PM GMT+1	Dog	Large (20-40kg)	24	<1	Yes	To prevent fleas (or other pests)	No	NA	Bravecto tablet;Simparica	Bravecto tablet	3	From a veterinary practice	NA	NA	NA	NA	No	No	NA	No	NA	4	On the furniture;In a crate	In a crate	Every 2 weeks	Every day	Every week or more	In a bath, sink or shower	Every week or more	3 hours	12 hours	Mainly on unpaved surfaces like field margins, forest tracks or the beach	Yes, I walk my dog even if it is raining heavily and my dog gets completely wet	5	Bag and bin (specific dog poo bin);Bag and bin (home council bin)	Bag and bin (home council bin)	Yes	NA	NA	NA	NA	NA	NA	NA	NA	NA	NA	NA	NA
2020/06/22 1:41:04 PM GMT+1	Dog	Large (20-40kg)	28	6	Yes	To prevent fleas (or other pests)	No	NA	Advocate;Bravecto tablet	Advocate	9	From a veterinary practice	Yes	Yes	Yes	NA	Yes	No	NA	No	NA	9	In their own bed;On the furniture;On the floor	On the furniture	Every 2 weeks	Every 2 days	Every 6 months	In a bath, sink or shower	Less than once a year	2 hours	3 hours	Mainly on unpaved surfaces like field margins, forest tracks or the beach	Yes, I walk my dog even if it is raining heavily and my dog gets completely wet	10	Bag and bin (specific dog poo bin);Bag and bin (home council bin);Straight in a bin (of any kind);Bury in the ground	Straight in a bin (of any kind)	No	NA	NA	NA	NA	NA	NA	NA	NA	NA	NA	NA	NA
2020/06/22 1:41:16 PM GMT+1	Cat	NA	NA	NA	NA	NA	NA	NA	NA	NA	NA	NA	NA	NA	NA	NA	NA	NA	NA	NA	NA	NA	NA	NA	NA	NA	NA	NA	NA	NA	NA	NA	NA	NA	NA	NA	NA	Small (below 4kg)	3.8	2	Yes	To prevent fleas (or other pests)	No	NA	Bravecto	Bravecto	3	From a veterinary practice	Yes
2020/06/22 1:43:59 PM GMT+1	Dog	Medium (10-20 kg)	12	9	Yes	In response to other pests (eg ticks)	No	NA	Bravecto tablet	Bravecto tablet	1	From a veterinary practice	Yes	Yes	Yes	NA	Yes	No	NA	Yes	June	None	On a family member's bed	On a family member's bed	Every 3 months	Every day	Every 6 months	Outdoors	Every month	1 hour	3 hours	An equal mixture of the above	Yes, I walk my dog even if it is raining heavily and my dog gets completely wet	4	Bag and bin (home council bin)	Bag and bin (home council bin)	No	NA	NA	NA	NA	NA	NA	NA	NA	NA	NA	NA	NA
2020/06/22 1:44:19 PM GMT+1	Dog	Medium (10-20 kg)	19	2	Yes	To prevent fleas (or other pests)	No	NA	Advocate	Advocate	10	From a veterinary practice	Yes	Yes	NA	NA	No	No	NA	No	NA	2	In their own bed	In their own bed	Every month	Every day	Every month	In a bath, sink or shower	Every week or more	2 hours	3 hours	Mainly on unpaved surfaces like field margins, forest tracks or the beach	Yes, I walk my dog even if it is raining heavily and my dog gets completely wet	9	Bag and bin (specific dog poo bin);Bag and bin (home council bin)	Bag and bin (home council bin)	No	NA	NA	NA	NA	NA	NA	NA	NA	NA	NA	NA	NA
2020/06/22 1:46:05 PM GMT+1	Dog	Small (4-10kg)	4.5	5	Yes	To prevent fleas (or other pests)	No	NA	Advocate	Advocate	12	From a veterinary practice	Yes	Yes	Yes	NA	No	No	NA	No	NA	3	In their own bed;On the furniture;On a family member's bed	On the floor	Once a year	Every day	Every month	In a bath, sink or shower	Never	1 hour	2 hours	Mainly on unpaved surfaces like field margins, forest tracks or the beach	Yes, I will walk my dog in light drizzle	8	Bag and bin (specific dog poo bin);Bag and bin (home council bin);Bury in the ground	Bag and bin (home council bin)	No	NA	NA	NA	NA	NA	NA	NA	NA	NA	NA	NA	NA
2020/06/22 1:46:09 PM GMT+1	Dog	Medium (10-20 kg)	12	8	Yes	To prevent fleas (or other pests)	No	NA	Advocate	Advocate	2	From a veterinary practice	No	No	NA	NA	No	No	NA	No	NA	2	In their own bed	In their own bed	Every 3 months	Every 2 days	Every 2 weeks	In a bath, sink or shower	Every 6 months	1 hour	1 hour	An equal mixture of the above	Yes, I will walk my dog in light drizzle	10	Bag and bin (specific dog poo bin)	Bag and bin (specific dog poo bin)	No	NA	NA	NA	NA	NA	NA	NA	NA	NA	NA	NA	NA
2020/06/22 1:48:07 PM GMT+1	Cat	NA	NA	NA	NA	NA	NA	NA	NA	NA	NA	NA	NA	NA	NA	NA	NA	NA	NA	NA	NA	NA	NA	NA	NA	NA	NA	NA	NA	NA	NA	NA	NA	NA	NA	NA	NA	Small (below 4kg)	3.5	13	Yes	To prevent fleas (or other pests)	No	NA	Advantage	Advantage	5	From a veterinary practice	No
2020/06/22 1:57:30 PM GMT+1	Dog	Medium (10-20 kg)	18	4	Yes	To prevent fleas (or other pests)	No	NA	NexGard Spectra	NexGard Spectra	8	From a veterinary practice	NA	NA	NA	NA	No	No	NA	No	NA	8	In their own bed;On the furniture;On a family member's bed;On the floor;In a crate	In their own bed	Every 3 months	Every 2 days	Every 3 months	Outdoors	Every 3 months	30 minutes	2 hours	Mainly on unpaved surfaces like field margins, forest tracks or the beach	Yes, I walk my dog even if it is raining heavily and my dog gets completely wet	9	Bag and bin (specific dog poo bin);Bag and bin (home council bin)	Bag and bin (specific dog poo bin)	No	NA	NA	NA	NA	NA	NA	NA	NA	NA	NA	NA	NA
2020/06/22 1:59:19 PM GMT+1	Dog	Large (20-40kg)	20	8	Yes	In response to other pests (eg ticks)	No	NA	Frontline or Frontline Combo spot on	Frontline or Frontline Combo spot on	2	Online	Yes	Yes	Yes	NA	No	No	NA	Yes	June	2	In their own bed	In their own bed	Every month	Every day	Every 2 weeks	Outdoors	Every month	1 hour	2 hours	An equal mixture of the above	Yes, I will walk my dog in light drizzle	10	Bag and bin (specific dog poo bin);Bag and bin (home council bin)	Bag and bin (home council bin)	No	NA	NA	NA	NA	NA	NA	NA	NA	NA	NA	NA	NA
2020/06/22 1:59:20 PM GMT+1	Cat	NA	NA	NA	NA	NA	NA	NA	NA	NA	NA	NA	NA	NA	NA	NA	NA	NA	NA	NA	NA	NA	NA	NA	NA	NA	NA	NA	NA	NA	NA	NA	NA	NA	NA	NA	NA	Large (above 4 kg)	5.5	10	No	NA	NA	NA	NA	NA	NA	NA	NA
2020/06/22 2:00:20 PM GMT+1	Dog	Medium (10-20 kg)	19.5	3	Yes	To prevent fleas (or other pests)	No	NA	Advantage	Advantage	12	From a veterinary practice	Yes	Yes	Yes	NA	Yes	Yes	May	No	NA	2	In their own bed;On the furniture;On a family member's bed;On the floor	On the furniture	Once a year	Every day	Every 2 weeks	In a bath, sink or shower	Every 2 weeks	1 hour	2 hours	Mainly on unpaved surfaces like field margins, forest tracks or the beach	Yes, I will walk my dog in light drizzle	10	Bag and bin (specific dog poo bin);Flush down the toilet	Bag and bin (specific dog poo bin)	No	NA	NA	NA	NA	NA	NA	NA	NA	NA	NA	NA	NA
2020/06/22 2:00:28 PM GMT+1	Cat	NA	NA	NA	NA	NA	NA	NA	NA	NA	NA	NA	NA	NA	NA	NA	NA	NA	NA	NA	NA	NA	NA	NA	NA	NA	NA	NA	NA	NA	NA	NA	NA	NA	NA	NA	NA	Small (below 4kg)	4	15	Yes	Other reason	No	NA	Advocate	Advocate	3	From a veterinary practice	No
2020/06/22 2:01:22 PM GMT+1	Dog	Small (4-10kg)	NA	8	Yes	To prevent fleas (or other pests)	No	NA	Frontline or Frontline Combo spot on	Frontline or Frontline Combo spot on	10	Online	No	Yes	Yes	NA	No	No	NA	No	NA	Don't know	On the furniture	On the furniture	Every 3 months	Every day	Every month	In a bath, sink or shower	Never	1 hour	2 hours	An equal mixture of the above	Occasionally, but I try to avoid this	10	Bag and bin (home council bin)	Bag and bin (home council bin)	No	NA	NA	NA	NA	NA	NA	NA	NA	NA	NA	NA	NA
2020/06/22 2:02:28 PM GMT+1	Cat	NA	NA	NA	NA	NA	NA	NA	NA	NA	NA	NA	NA	NA	NA	NA	NA	NA	NA	NA	NA	NA	NA	NA	NA	NA	NA	NA	NA	NA	NA	NA	NA	NA	NA	NA	NA	Small (below 4kg)	3.05	9	Yes	To prevent fleas (or other pests)	No	NA	Effipro Spot On;Frontline or Frontline Combo	Effipro Spot On	4	Online	Yes
2020/06/22 2:02:55 PM GMT+1	Dog	Large (20-40kg)	25	1	Yes	To prevent fleas (or other pests)	No	NA	Advocate	Advocate	12	From a veterinary practice	No	Yes	Yes	NA	No	No	NA	No	NA	4	In their own bed;On the floor	On the floor	Every 2 weeks	Every day	Every 2 weeks	Outdoors	Every 2 weeks	2 hours	6 hours	Mainly on unpaved surfaces like field margins, forest tracks or the beach	Yes, I walk my dog even if it is raining heavily and my dog gets completely wet	10	Bag and bin (specific dog poo bin)	Bag and bin (specific dog poo bin)	No	NA	NA	NA	NA	NA	NA	NA	NA	NA	NA	NA	NA
2020/06/22 2:03:04 PM GMT+1	Dog	Small (4-10kg)	8.5	1	Yes	To prevent fleas (or other pests)	No	NA	Advocate	Advocate	12	From a veterinary practice	NA	NA	NA	NA	No	No	NA	No	NA	2	In their own bed;On the furniture;On a family member's bed	On a family member's bed	Every 3 months	Every day	Every month	In a bath, sink or shower	Every 3 months	1 hour	3 hours	An equal mixture of the above	Yes, I will walk my dog in light drizzle	10	Bag and bin (specific dog poo bin);Bag and bin (home council bin)	Bag and bin (home council bin)	No	NA	NA	NA	NA	NA	NA	NA	NA	NA	NA	NA	NA
2020/06/22 2:04:17 PM GMT+1	Dog	Extra large (over 40 kg)	NA	9	Yes	To prevent fleas (or other pests)	No	NA	Frontline or Frontline Combo spot on	Frontline or Frontline Combo spot on	6	From a petshop	Yes	Yes	Yes	NA	Yes	No	NA	No	NA	2	In their own bed;On the furniture;On a family member's bed	In their own bed	Every 2 weeks	Every day	Every month	In a bath, sink or shower	Less than once a year	1 hour	2 hours	An equal mixture of the above	Yes, I will walk my dog in light drizzle	10	Bag and bin (specific dog poo bin);Bag and bin (home council bin)	Bag and bin (specific dog poo bin)	No	NA	NA	NA	NA	NA	NA	NA	NA	NA	NA	NA	NA
2020/06/22 2:06:54 PM GMT+1	Dog	Small (4-10kg)	7.65	18	Yes	To prevent fleas (or other pests)	No	NA	Bravecto tablet	Bravecto tablet	4	From a veterinary practice	NA	NA	NA	NA	No	No	NA	No	NA	12	In their own bed;On the furniture;On a family member's bed	On a family member's bed	Every 3 months	Every day	Never	NA	Never	10 minutes	30 minutes	An equal mixture of the above	Yes, I walk my dog even if it is raining heavily and my dog gets completely wet	10	Bag and bin (specific dog poo bin);Bag and bin (home council bin);Flush down the toilet	Bag and bin (home council bin)	No	NA	NA	NA	NA	NA	NA	NA	NA	NA	NA	NA	NA
2020/06/22 2:07:22 PM GMT+1	Dog	Large (20-40kg)	32	6	Yes	To prevent fleas (or other pests)	No	NA	Seresto collar	Seresto collar	1	Online	NA	NA	NA	NA	No	No	NA	No	NA	1	On the furniture;On the floor;In a crate	On the furniture	Every month	Every day	Less than once a year	NA	Every month	2 hours	3 hours	An equal mixture of the above	Yes, I walk my dog even if it is raining heavily and my dog gets completely wet	10	Bag and bin (specific dog poo bin)	Bag and bin (specific dog poo bin)	No	NA	NA	NA	NA	NA	NA	NA	NA	NA	NA	NA	NA
2020/06/22 2:11:13 PM GMT+1	Dog	Medium (10-20 kg)	16	3	Yes	To prevent fleas (or other pests)	Yes	Billy no mates	Advocate	Advocate	1	Online	No	Yes	Yes	NA	No	No	NA	Yes	May	1	In their own bed;On the furniture;On the floor	In their own bed	Every 3 months	Every day	Every week or more	Outdoors	Every week or more	2 hours	3 hours	Mainly on unpaved surfaces like field margins, forest tracks or the beach	Yes, I walk my dog even if it is raining heavily and my dog gets completely wet	8	Bag and bin (specific dog poo bin);Bag and bin (home council bin)	Bag and bin (home council bin)	Yes	NA	NA	NA	NA	NA	NA	NA	NA	NA	NA	NA	NA
2020/06/22 2:11:29 PM GMT+1	Dog	Large (20-40kg)	NA	10	Yes	To prevent fleas (or other pests)	No	NA	Frontline or Frontline Combo spot on	Frontline or Frontline Combo spot on	2	From a veterinary practice	NA	NA	Yes	NA	No	No	NA	No	NA	1	In their own bed	In their own bed	Every month	Every day	Every 2 weeks	Outdoors	Every month	30 minutes	3 hours	An equal mixture of the above	Yes, I will walk my dog in light drizzle	0	Bag and bin (home council bin)	Bag and bin (home council bin)	No	NA	NA	NA	NA	NA	NA	NA	NA	NA	NA	NA	NA
2020/06/22 2:12:00 PM GMT+1	Dog	Medium (10-20 kg)	20	9	Yes	To prevent fleas (or other pests)	No	NA	Bravecto tablet	Bravecto tablet	4	From a veterinary practice	NA	NA	NA	NA	No	No	NA	No	NA	4	In their own bed;On the furniture;On a family member's bed	In their own bed	Every 3 months	Every day	Every month	In a bath, sink or shower	Less than once a year	1 hour	2 hours	Mainly on unpaved surfaces like field margins, forest tracks or the beach	Occasionally, but I try to avoid this	10	Bag and bin (specific dog poo bin);Bag and bin (home council bin)	Bag and bin (specific dog poo bin)	No	NA	NA	NA	NA	NA	NA	NA	NA	NA	NA	NA	NA
2020/06/22 2:12:47 PM GMT+1	Dog	Medium (10-20 kg)	18	3	No	NA	NA	NA	NA	NA	NA	NA	NA	NA	NA	NA	No	No	NA	No	NA	None	In their own bed;On the furniture;On a family member's bed;On the floor;In a crate	In a crate	Every month	Every day	Once a year	In a bath, sink or shower	Never	30 minutes	30 minutes	An equal mixture of the above	Occasionally, but I try to avoid this	10	Bag and bin (specific dog poo bin);Bag and bin (home council bin)	Bag and bin (home council bin)	No	NA	NA	NA	NA	NA	NA	NA	NA	NA	NA	NA	NA
2020/06/22 2:13:03 PM GMT+1	Dog	Medium (10-20 kg)	13	1	Yes	To prevent fleas (or other pests)	No	NA	NexGard;Prinovox	NexGard	4	From a veterinary practice	NA	NA	NA	NA	No	No	NA	No	NA	4	In their own bed	In their own bed	Every 2 weeks	Every day	Every week or more	In a bath, sink or shower	Never	1 hour	3 hours	Mainly on unpaved surfaces like field margins, forest tracks or the beach	Yes, I will walk my dog in light drizzle	10	Bag and bin (home council bin)	Bag and bin (home council bin)	No	NA	NA	NA	NA	NA	NA	NA	NA	NA	NA	NA	NA
2020/06/22 2:14:53 PM GMT+1	Dog	Large (20-40kg)	32	6	No	NA	NA	NA	NA	NA	NA	NA	NA	NA	NA	NA	No	No	NA	No	NA	1	On the furniture	On the furniture	Every month	Every day	Never	NA	Every week or more	1 hour	3 hours	Mainly on unpaved surfaces like field margins, forest tracks or the beach	Yes, I walk my dog even if it is raining heavily and my dog gets completely wet	10	Bag and bin (home council bin)	Bag and bin (home council bin)	No	NA	NA	NA	NA	NA	NA	NA	NA	NA	NA	NA	NA
2020/06/22 2:15:14 PM GMT+1	Dog	Small (4-10kg)	8.5	11	Yes	To prevent fleas (or other pests)	No	NA	Advocate;NexGard Spectra	NexGard Spectra	6	From a veterinary practice	Yes	Yes	Yes	NA	Yes	No	NA	No	NA	4	In their own bed;On the furniture;On a family member's bed;On the floor	On the furniture	Every month	Every day	Less than once a year	NA	Every week or more	1 hour	3 hours	An equal mixture of the above	Occasionally, but I try to avoid this	10	Bag and bin (specific dog poo bin);Bag and bin (home council bin)	Bag and bin (home council bin)	No	NA	NA	NA	NA	NA	NA	NA	NA	NA	NA	NA	NA
2020/06/22 2:16:48 PM GMT+1	Dog	Large (20-40kg)	25	7	Yes	In response to other pests (eg ticks)	No	NA	NexGard Spectra	NexGard Spectra	12	Online	NA	NA	NA	NA	No	No	NA	Yes	May;June	4	In their own bed;On the floor	In their own bed	Every 2 weeks	Every day	Every 2 weeks	In a bath, sink or shower	Every 2 weeks	1 hour	1 hour	Mainly on unpaved surfaces like field margins, forest tracks or the beach	Yes, I walk my dog even if it is raining heavily and my dog gets completely wet	9	Bag and bin (specific dog poo bin);Bag and bin (home council bin);Straight in a bin (of any kind)	Bag and bin (specific dog poo bin)	No	NA	NA	NA	NA	NA	NA	NA	NA	NA	NA	NA	NA
2020/06/22 2:18:16 PM GMT+1	Cat	NA	NA	NA	NA	NA	NA	NA	NA	NA	NA	NA	NA	NA	NA	NA	NA	NA	NA	NA	NA	NA	NA	NA	NA	NA	NA	NA	NA	NA	NA	NA	NA	NA	NA	NA	NA	Small (below 4kg)	3.5	<1	Yes	To prevent fleas (or other pests)	No	NA	Advocate	Advocate	3	From a veterinary practice	No
2020/06/22 2:18:24 PM GMT+1	Dog	Medium (10-20 kg)	15	2	No	NA	NA	NA	NA	NA	NA	NA	NA	NA	NA	NA	Yes	No	NA	No	NA	1	On a family member's bed	On the furniture	Every month	Every day	Every 6 months	In a bath, sink or shower	Every week or more	2 hours	3 hours	An equal mixture of the above	Yes, I walk my dog even if it is raining heavily and my dog gets completely wet	9	Bag and bin (home council bin)	Bag and bin (home council bin)	No	NA	NA	NA	NA	NA	NA	NA	NA	NA	NA	NA	NA
2020/06/22 2:19:37 PM GMT+1	Dog	Large (20-40kg)	22	7	Yes	In response to other pests (eg ticks)	No	NA	Frontline or Frontline Combo spot on;Seresto collar	Seresto collar	2	From a petshop	No	Yes	Yes	NA	Yes	Yes	October;November	Yes	April;May	None	In their own bed;On a family member's bed;On the floor	On a family member's bed	Every month	Every day	Every week or more	Outdoors	Every week or more	1 hour	3 hours	Mainly on unpaved surfaces like field margins, forest tracks or the beach	Yes, I walk my dog even if it is raining heavily and my dog gets completely wet	7	Bag and bin (specific dog poo bin);Bag and bin (home council bin)	Bag and bin (specific dog poo bin)	No	NA	NA	NA	NA	NA	NA	NA	NA	NA	NA	NA	NA
2020/06/22 2:19:56 PM GMT+1	Dog	Medium (10-20 kg)	20	3	Yes	To prevent fleas (or other pests)	No	NA	Advocate	Advocate	12	From a veterinary practice	Yes	Yes	Yes	NA	No	No	NA	No	NA	4	In their own bed	In their own bed	Every 3 months	Every week	Every 3 months	Outdoors	Every month	1 hour	2 hours	Mainly on unpaved surfaces like field margins, forest tracks or the beach	Occasionally, but I try to avoid this	10	Bag and bin (specific dog poo bin);Bag and bin (home council bin)	Bag and bin (home council bin)	No	NA	NA	NA	NA	NA	NA	NA	NA	NA	NA	NA	NA
2020/06/22 2:20:24 PM GMT+1	Dog	Medium (10-20 kg)	12.5	5	Yes	To prevent fleas (or other pests)	No	NA	NexGard Spectra;Simparica	NexGard Spectra	10	From a veterinary practice	NA	NA	NA	NA	No	No	NA	No	NA	11	In their own bed	In their own bed	Every month	Every 2 days	Every 2 weeks	Outdoors	Every week or more	2 hours	3 hours	Mainly on unpaved surfaces like field margins, forest tracks or the beach	Yes, I walk my dog even if it is raining heavily and my dog gets completely wet	9	Bag and bin (specific dog poo bin);Bag and bin (home council bin)	Bag and bin (specific dog poo bin)	No	NA	NA	NA	NA	NA	NA	NA	NA	NA	NA	NA	NA
2020/06/22 2:22:37 PM GMT+1	Dog	Large (20-40kg)	33	6	Yes	To prevent fleas (or other pests)	No	NA	Seresto collar	Seresto collar	2	From a veterinary practice	NA	No	NA	NA	No	No	NA	No	NA	4	In their own bed	In their own bed	Every 2 weeks	Never	Less than once a year	NA	Don't know	2 hours	3 hours	Mainly on unpaved surfaces like field margins, forest tracks or the beach	Yes, I walk my dog even if it is raining heavily and my dog gets completely wet	10	Bag and bin (specific dog poo bin)	Bag and bin (specific dog poo bin)	No	NA	NA	NA	NA	NA	NA	NA	NA	NA	NA	NA	NA
2020/06/22 2:24:05 PM GMT+1	Dog	Medium (10-20 kg)	11.6	3	Yes	To prevent fleas (or other pests)	No	NA	Prinovox	Prinovox	12	From a veterinary practice	Yes	Yes	Yes	NA	No	No	NA	Yes	May;June;July;August	4	In their own bed;On the furniture;On a family member's bed;On the floor	In their own bed	Every 3 months	Every day	Every month	At the groomers	Every 3 months	2 hours	6 hours	Mainly on unpaved surfaces like field margins, forest tracks or the beach	Yes, I walk my dog even if it is raining heavily and my dog gets completely wet	9	Bag and bin (specific dog poo bin);Bag and bin (home council bin)	Bag and bin (home council bin)	No	NA	NA	NA	NA	NA	NA	NA	NA	NA	NA	NA	NA
2020/06/22 2:26:01 PM GMT+1	Dog	Medium (10-20 kg)	17	2	Yes	To prevent fleas (or other pests)	No	NA	Bravecto tablet;Frontline or Frontline Combo spot on;NexGard Spectra	NexGard Spectra	4	From a veterinary practice	Yes	Yes	Yes	NA	No	No	NA	No	NA	3	In their own bed;On the furniture;On a family member's bed;On the floor;In a crate	In their own bed	Every month	Every day	Every 2 weeks	In a bath, sink or shower	Every week or more	3 hours	3 hours	Mainly on unpaved surfaces like field margins, forest tracks or the beach	Yes, I walk my dog even if it is raining heavily and my dog gets completely wet	9	Bag and bin (specific dog poo bin);Bag and bin (home council bin)	Bag and bin (specific dog poo bin)	No	NA	NA	NA	NA	NA	NA	NA	NA	NA	NA	NA	NA
2020/06/22 2:26:18 PM GMT+1	Dog	Small (4-10kg)	6.5	10	Yes	In response to a flea infestation	Yes	Herbal Pet Supplies - No More Bites	Bravecto tablet	Bravecto tablet	1	From a veterinary practice	No	Yes	Yes	NA	Yes	Yes	March	No	NA	None	On a family member's bed	On a family member's bed	Every 2 weeks	Every day	Every month	In a bath, sink or shower	Never	1 hour	2 hours	An equal mixture of the above	Yes, I will walk my dog in light drizzle	10	Bag and bin (specific dog poo bin)	Bag and bin (specific dog poo bin)	No	NA	NA	NA	NA	NA	NA	NA	NA	NA	NA	NA	NA
2020/06/22 2:27:29 PM GMT+1	Dog	Miniature (< 4 kg)	4	15	Yes	To prevent fleas (or other pests)	No	NA	Bravecto tablet	Bravecto tablet	4	From a veterinary practice	NA	NA	NA	NA	No	No	NA	No	NA	5	In their own bed;On the furniture;On a family member's bed;On the floor	In their own bed	Every 3 months	Every day	Every 2 weeks	In a bath, sink or shower	Never	1 hour	2 hours	An equal mixture of the above	Yes, I walk my dog even if it is raining heavily and my dog gets completely wet	10	Bag and bin (specific dog poo bin);Bag and bin (home council bin);Bury in the ground	Bag and bin (home council bin)	No	NA	NA	NA	NA	NA	NA	NA	NA	NA	NA	NA	NA
2020/06/22 2:27:30 PM GMT+1	Dog	Large (20-40kg)	21	3	Yes	To prevent fleas (or other pests)	No	NA	Bravecto tablet	Bravecto tablet	4	From a veterinary practice	NA	NA	NA	NA	No	Yes	January;December	Yes	May;June	4	In their own bed;On the furniture;On a family member's bed;On the floor;In a crate	In a crate	Every month	Every day	Every week or more	Outdoors	Every 2 weeks	30 minutes	2 hours	Mainly on unpaved surfaces like field margins, forest tracks or the beach	Yes, I will walk my dog in light drizzle	5	Bag and bin (specific dog poo bin)	Bag and bin (specific dog poo bin)	No	NA	NA	NA	NA	NA	NA	NA	NA	NA	NA	NA	NA
2020/06/22 2:28:36 PM GMT+1	Dog	Large (20-40kg)	36	1	Yes	To prevent fleas (or other pests)	No	NA	Bravecto tablet	Bravecto tablet	6	From a veterinary practice	NA	NA	NA	NA	Yes	Yes	September	No	NA	9	In their own bed;On the furniture;On the floor;In a crate	In a crate	Every 2 weeks	Every day	Every week or more	In a bath, sink or shower	Every week or more	1 hour	2 hours	Mainly on unpaved surfaces like field margins, forest tracks or the beach	Yes, I walk my dog even if it is raining heavily and my dog gets completely wet	9	Bag and bin (specific dog poo bin);Bag and bin (home council bin);Straight in a bin (of any kind)	Straight in a bin (of any kind)	No	NA	NA	NA	NA	NA	NA	NA	NA	NA	NA	NA	NA
2020/06/22 2:28:52 PM GMT+1	Dog	Large (20-40kg)	25	3	Yes	To prevent fleas (or other pests)	No	NA	Bravecto tablet	Bravecto tablet	4	From a veterinary practice	NA	NA	NA	NA	No	No	NA	Yes	June	4	In their own bed	In their own bed	Every month	Every day	Every month	In a bath, sink or shower	Every month	3 hours	3 hours	An equal mixture of the above	Yes, I walk my dog even if it is raining heavily and my dog gets completely wet	10	Bag and bin (specific dog poo bin);Bag and bin (home council bin);Bury in the ground	Bury in the ground	No	NA	NA	NA	NA	NA	NA	NA	NA	NA	NA	NA	NA
2020/06/22 2:29:50 PM GMT+1	Dog	Medium (10-20 kg)	19	12	Yes	To prevent fleas (or other pests)	No	NA	Advocate;Seresto collar	Seresto collar	2	Online	Yes	Yes	Yes	NA	No	No	NA	No	NA	4	In their own bed;On the furniture;On a family member's bed;On the floor;In a crate	In their own bed	Every month	Every day	Every week or more	In a bath, sink or shower	Every week or more	1 hour	3 hours	Mainly on unpaved surfaces like field margins, forest tracks or the beach	Yes, I will walk my dog in light drizzle	0	Bag and bin (specific dog poo bin);Bag and bin (home council bin);Flush down the toilet;Bury in the ground	Bag and bin (specific dog poo bin)	No	NA	NA	NA	NA	NA	NA	NA	NA	NA	NA	NA	NA
2020/06/22 2:31:38 PM GMT+1	Cat	NA	NA	NA	NA	NA	NA	NA	NA	NA	NA	NA	NA	NA	NA	NA	NA	NA	NA	NA	NA	NA	NA	NA	NA	NA	NA	NA	NA	NA	NA	NA	NA	NA	NA	NA	NA	Small (below 4kg)	NA	16	Yes	In response to a flea infestation	No	NA	Bravecto	Bravecto	2	From a veterinary practice	No
2020/06/22 2:33:40 PM GMT+1	Dog	Large (20-40kg)	26	<1	Yes	To prevent fleas (or other pests)	No	NA	Advocate	Advocate	8	From a veterinary practice	Yes	Yes	Yes	NA	No	No	NA	No	NA	4	In their own bed;On the furniture;On the floor	In their own bed	Every week or more	Every day	Every 2 weeks	In a bath, sink or shower	Never	6 hours or more	12 hours	Mainly on unpaved surfaces like field margins, forest tracks or the beach	Yes, I walk my dog even if it is raining heavily and my dog gets completely wet	10	Bag and bin (specific dog poo bin);Bag and bin (home council bin)	Bag and bin (home council bin)	Yes	NA	NA	NA	NA	NA	NA	NA	NA	NA	NA	NA	NA
2020/06/22 2:34:13 PM GMT+1	Dog	Medium (10-20 kg)	11	6	Yes	To prevent fleas (or other pests)	Yes	neem oil and herbal	Advantage	Advantage	1	Other type of shop - pharmacy/agricultural/equestrian/other	No	Yes	Yes	NA	No	No	NA	No	NA	1	In their own bed	In their own bed	Every month	Every day	Every month	In a bath, sink or shower	Never	2 hours	3 hours	Mainly on paved surfaces	Yes, I walk my dog even if it is raining heavily and my dog gets completely wet	10	Bag and bin (specific dog poo bin);Bag and bin (home council bin)	Bag and bin (home council bin)	Yes	NA	NA	NA	NA	NA	NA	NA	NA	NA	NA	NA	NA
2020/06/22 2:34:27 PM GMT+1	Cat	NA	NA	NA	NA	NA	NA	NA	NA	NA	NA	NA	NA	NA	NA	NA	NA	NA	NA	NA	NA	NA	NA	NA	NA	NA	NA	NA	NA	NA	NA	NA	NA	NA	NA	NA	NA	Large (above 4 kg)	5.5	9	Yes	To prevent fleas (or other pests)	No	NA	Stronghold	Stronghold	12	From a veterinary practice	No
2020/06/22 2:35:51 PM GMT+1	Dog	Medium (10-20 kg)	16.5	2	No	NA	NA	NA	NA	NA	NA	NA	NA	NA	NA	NA	No	No	NA	Yes	March;April;May;June;July;August	1	In their own bed;On the floor	In their own bed	Every month	Every day	Every 2 weeks	In a bath, sink or shower	Every week or more	2 hours	3 hours	Mainly on unpaved surfaces like field margins, forest tracks or the beach	Yes, I walk my dog even if it is raining heavily and my dog gets completely wet	10	Bag and bin (specific dog poo bin);Straight in a bin (of any kind)	Bag and bin (specific dog poo bin)	Yes	NA	NA	NA	NA	NA	NA	NA	NA	NA	NA	NA	NA
2020/06/22 2:38:43 PM GMT+1	Cat	NA	NA	NA	NA	NA	NA	NA	NA	NA	NA	NA	NA	NA	NA	NA	NA	NA	NA	NA	NA	NA	NA	NA	NA	NA	NA	NA	NA	NA	NA	NA	NA	NA	NA	NA	NA	Large (above 4 kg)	5.2	11	Yes	To prevent fleas (or other pests)	No	NA	Bravecto	Bravecto	4	From a veterinary practice	No
2020/06/22 2:40:44 PM GMT+1	Dog	Large (20-40kg)	28	2	Yes	To prevent fleas (or other pests)	No	NA	Bravecto tablet	Bravecto tablet	4	From a veterinary practice	NA	NA	NA	NA	No	No	NA	Yes	February;March;April;May;June;July;August;September	12	In their own bed;On the furniture;On a family member's bed	On a family member's bed	Every week or more	Every day	Every week or more	In a bath, sink or shower	Every week or more	3 hours	3 hours	Mainly on unpaved surfaces like field margins, forest tracks or the beach	Yes, I walk my dog even if it is raining heavily and my dog gets completely wet	8	Bag and bin (specific dog poo bin);Bag and bin (home council bin)	Bag and bin (specific dog poo bin)	No	NA	NA	NA	NA	NA	NA	NA	NA	NA	NA	NA	NA
2020/06/22 2:41:30 PM GMT+1	Dog	Medium (10-20 kg)	12	7	Yes	To prevent fleas (or other pests)	No	NA	Bravecto tablet	Bravecto tablet	3	From a veterinary practice	NA	NA	NA	NA	No	No	NA	No	NA	2	In their own bed	In their own bed	Every month	Every day	Every 2 weeks	Outdoors	Every 2 weeks	3 hours	6 hours	Mainly on unpaved surfaces like field margins, forest tracks or the beach	Yes, I walk my dog even if it is raining heavily and my dog gets completely wet	5	Bag and bin (home council bin)	NA	Yes	NA	NA	NA	NA	NA	NA	NA	NA	NA	NA	NA	NA
2020/06/22 2:42:01 PM GMT+1	Cat	NA	NA	NA	NA	NA	NA	NA	NA	NA	NA	NA	NA	NA	NA	NA	NA	NA	NA	NA	NA	NA	NA	NA	NA	NA	NA	NA	NA	NA	NA	NA	NA	NA	NA	NA	NA	Small (below 4kg)	2.93	3	Don't know	NA	NA	NA	NA	NA	NA	NA	NA
2020/06/22 2:45:16 PM GMT+1	Cat	NA	NA	NA	NA	NA	NA	NA	NA	NA	NA	NA	NA	NA	NA	NA	NA	NA	NA	NA	NA	NA	NA	NA	NA	NA	NA	NA	NA	NA	NA	NA	NA	NA	NA	NA	NA	Small (below 4kg)	3.8	3	Yes	In response to a flea infestation	No	NA	Don't know	Don't know	1	From a veterinary practice	Yes
2020/06/22 2:45:47 PM GMT+1	Dog	Large (20-40kg)	30	<1	Yes	To prevent fleas (or other pests)	No	NA	Advocate	Advocate	7	From a petshop	No	Yes	Yes	NA	No	No	NA	No	NA	4	In their own bed;On the furniture;On the floor	On the furniture	Every 2 weeks	Every day	Every 3 months	Outdoors	Every 3 months	3 hours	6 hours	An equal mixture of the above	Yes, I walk my dog even if it is raining heavily and my dog gets completely wet	10	Bag and bin (specific dog poo bin);Bag and bin (home council bin)	Bag and bin (home council bin)	No	NA	NA	NA	NA	NA	NA	NA	NA	NA	NA	NA	NA
2020/06/22 2:46:22 PM GMT+1	Dog	Large (20-40kg)	26	6	Yes	To prevent fleas (or other pests)	No	NA	Bravecto tablet	Bravecto tablet	3	From a veterinary practice	NA	NA	NA	NA	No	No	NA	Yes	September	4	On a family member's bed	On a family member's bed	Every 2 weeks	Every day	Every week or more	Outdoors	Every 3 months	1 hour	2 hours	Mainly on unpaved surfaces like field margins, forest tracks or the beach	Yes, I walk my dog even if it is raining heavily and my dog gets completely wet	7	Bag and bin (specific dog poo bin);Bag and bin (home council bin);Straight in a bin (of any kind)	Bag and bin (home council bin)	No	NA	NA	NA	NA	NA	NA	NA	NA	NA	NA	NA	NA
2020/06/22 2:48:35 PM GMT+1	Dog	Large (20-40kg)	31	11	Yes	To prevent fleas (or other pests)	No	NA	Bravecto tablet	Bravecto tablet	4	Online	NA	NA	NA	NA	No	No	NA	No	NA	4	In their own bed;On the furniture;On the floor	On the furniture	Every 3 months	Every week	Every 6 months	Outdoors	Never	1 hour	1 hour	Mainly on paved surfaces	Occasionally, but I try to avoid this	10	Bag and bin (specific dog poo bin);Bag and bin (home council bin);Straight in a bin (of any kind)	Bag and bin (home council bin)	No	NA	NA	NA	NA	NA	NA	NA	NA	NA	NA	NA	NA
2020/06/22 2:49:30 PM GMT+1	Dog	Large (20-40kg)	30	8	Yes	To prevent fleas (or other pests)	No	NA	Frontline or Frontline Combo spot on	NexGard	1	From a supermarket	No	Yes	Yes	NA	No	No	NA	No	NA	2	In their own bed;On the floor	On the floor	Every 3 months	Never	Every week or more	Outdoors	Every week or more	3 hours	3 hours	An equal mixture of the above	Never	10	Bag and bin (specific dog poo bin)	Bag and bin (specific dog poo bin)	No	NA	NA	NA	NA	NA	NA	NA	NA	NA	NA	NA	NA
2020/06/22 2:50:57 PM GMT+1	Cat	NA	NA	NA	NA	NA	NA	NA	NA	NA	NA	NA	NA	NA	NA	NA	NA	NA	NA	NA	NA	NA	NA	NA	NA	NA	NA	NA	NA	NA	NA	NA	NA	NA	NA	NA	NA	Small (below 4kg)	3.5	2	Yes	To prevent fleas (or other pests)	No	NA	Stronghold	Stronghold	11	From a veterinary practice	Yes
2020/06/22 2:51:53 PM GMT+1	Dog	Medium (10-20 kg)	14	8	No	NA	NA	NA	NA	NA	NA	NA	NA	NA	NA	NA	No	No	NA	No	NA	1	In their own bed;On the furniture;On the floor;In a crate	In a crate	Every month	Every day	Every 6 months	At the groomers	Every 3 months	2 hours	6 hours	Mainly on unpaved surfaces like field margins, forest tracks or the beach	Yes, I walk my dog even if it is raining heavily and my dog gets completely wet	10	Bag and bin (specific dog poo bin);Bag and bin (home council bin)	Bag and bin (home council bin)	No	NA	NA	NA	NA	NA	NA	NA	NA	NA	NA	NA	NA
2020/06/22 2:52:27 PM GMT+1	Dog	Medium (10-20 kg)	14	7	No	NA	NA	NA	NA	NA	NA	NA	NA	NA	NA	NA	No	No	NA	No	NA	None	In their own bed;In a crate	In a crate	Every 3 months	Every day	Every month	At the groomers	Every 3 months	30 minutes	3 hours	An equal mixture of the above	Yes, I walk my dog even if it is raining heavily and my dog gets completely wet	10	Bag and bin (specific dog poo bin);Bag and bin (home council bin)	Bag and bin (home council bin)	Yes	NA	NA	NA	NA	NA	NA	NA	NA	NA	NA	NA	NA
2020/06/22 2:57:15 PM GMT+1	Dog	Small (4-10kg)	9	4	Yes	To prevent fleas (or other pests)	No	NA	Bravecto tablet	Bravecto tablet	4	From a veterinary practice	NA	NA	NA	NA	No	No	NA	No	NA	4	In their own bed;On the furniture;On the floor	On the furniture	Every 2 weeks	Every day	Every 6 months	In a bath, sink or shower	Every month	1 hour	3 hours	Mainly on unpaved surfaces like field margins, forest tracks or the beach	Yes, I walk my dog even if it is raining heavily and my dog gets completely wet	10	Bag and bin (specific dog poo bin)	Bag and bin (specific dog poo bin)	No	NA	NA	NA	NA	NA	NA	NA	NA	NA	NA	NA	NA
2020/06/22 2:57:15 PM GMT+1	Dog	Medium (10-20 kg)	13.5	4	Yes	To prevent fleas (or other pests)	No	NA	Bravecto tablet	Bravecto tablet	3	From a veterinary practice	NA	Yes	Yes	NA	No	No	NA	No	NA	12	In their own bed;On the furniture;On the floor	In their own bed	Every week or more	Every day	Every week or more	Outdoors	Every week or more	1 hour	Over 12 hours	Mainly on unpaved surfaces like field margins, forest tracks or the beach	Yes, I walk my dog even if it is raining heavily and my dog gets completely wet	10	Bag and bin (specific dog poo bin)	Bag and bin (specific dog poo bin)	Yes	NA	NA	NA	NA	NA	NA	NA	NA	NA	NA	NA	NA
2020/06/22 2:58:52 PM GMT+1	Dog	Large (20-40kg)	25	10	No	NA	NA	NA	NA	NA	NA	NA	NA	NA	NA	NA	No	No	NA	No	NA	3	In their own bed	In their own bed	Every 3 months	Every day	Every 3 months	In a bath, sink or shower	Once a year	1 hour	1 hour	Mainly on unpaved surfaces like field margins, forest tracks or the beach	Yes, I will walk my dog in light drizzle	8	Bag and bin (specific dog poo bin);Bag and bin (home council bin)	Bag and bin (specific dog poo bin)	No	NA	NA	NA	NA	NA	NA	NA	NA	NA	NA	NA	NA
2020/06/22 2:59:38 PM GMT+1	Dog	Large (20-40kg)	37	8	Yes	To prevent fleas (or other pests)	No	NA	Endectrid Spot On	Endectrid Spot On	10	From a veterinary practice	Yes	Yes	Yes	NA	No	No	NA	No	NA	2	In their own bed;On the furniture;On the floor	On the furniture	Every week or more	Every day	Every month	Outdoors	Never	1 hour	2 hours	Mainly on unpaved surfaces like field margins, forest tracks or the beach	Yes, I will walk my dog in light drizzle	8	Bag and bin (home council bin)	Bag and bin (home council bin)	No	NA	NA	NA	NA	NA	NA	NA	NA	NA	NA	NA	NA
2020/06/22 2:59:44 PM GMT+1	Dog	Small (4-10kg)	8.4	3	Yes	To prevent fleas (or other pests)	No	NA	Fipnil/ Fipralone/ Fiprene/ Fiprex/ Fiproclear/ Fiprofile/ Fipronil/ Fiprotec/ Fiproxole/ Fleanil/ Fleascreen/ Flevox/ Flick/ Fyperix;Prinovox	Prinovox	12	From a veterinary practice	No	Yes	Yes	NA	No	No	NA	No	NA	4	In their own bed	In their own bed	Every 2 weeks	Never	Don't know	At the groomers	Never	2 hours	3 hours	An equal mixture of the above	Yes, I walk my dog even if it is raining heavily and my dog gets completely wet	10	Bag and bin (home council bin)	Bag and bin (specific dog poo bin)	No	NA	NA	NA	NA	NA	NA	NA	NA	NA	NA	NA	NA
2020/06/22 3:00:02 PM GMT+1	Dog	Large (20-40kg)	22	4	Yes	To prevent fleas (or other pests)	No	NA	NexGard Spectra	NexGard Spectra	12	From a veterinary practice	NA	NA	NA	NA	No	No	NA	No	NA	12	In their own bed;On the furniture;On a family member's bed;On the floor	On the furniture	Every month	Every day	Every 3 months	At the groomers	Every week or more	2 hours	6 hours	Mainly on unpaved surfaces like field margins, forest tracks or the beach	Yes, I walk my dog even if it is raining heavily and my dog gets completely wet	8	Bag and bin (specific dog poo bin)	Bag and bin (specific dog poo bin)	No	NA	NA	NA	NA	NA	NA	NA	NA	NA	NA	NA	NA
2020/06/22 3:02:21 PM GMT+1	Dog	Large (20-40kg)	22	7	Yes	To prevent fleas (or other pests)	No	NA	Advocate	Advocate	4	From a veterinary practice	Yes	NA	NA	NA	No	No	NA	No	NA	2	In their own bed;On the furniture	In their own bed	Less than once a year	Every day	Every 3 months	In a bath, sink or shower	Every month	1 hour	3 hours	Mainly on unpaved surfaces like field margins, forest tracks or the beach	Yes, I walk my dog even if it is raining heavily and my dog gets completely wet	10	Bag and bin (specific dog poo bin);Bag and bin (home council bin)	Bag and bin (specific dog poo bin)	No	NA	NA	NA	NA	NA	NA	NA	NA	NA	NA	NA	NA
2020/06/22 3:02:35 PM GMT+1	Dog	Large (20-40kg)	38	7	Yes	To prevent fleas (or other pests)	No	NA	Advocate	Advocate	11	From a veterinary practice	Yes	Yes	Yes	NA	Don't know	Yes	June	No	NA	1	In their own bed;On the furniture;On the floor	On the furniture	Every week or more	Every day	Every 2 weeks	At the groomers	Don't know	1 hour	2 hours	An equal mixture of the above	Yes, I walk my dog even if it is raining heavily and my dog gets completely wet	9	Bag and bin (specific dog poo bin);Bag and bin (home council bin);Straight in a bin (of any kind)	Bag and bin (specific dog poo bin)	No	NA	NA	NA	NA	NA	NA	NA	NA	NA	NA	NA	NA
2020/06/22 3:04:27 PM GMT+1	Cat	NA	NA	NA	NA	NA	NA	NA	NA	NA	NA	NA	NA	NA	NA	NA	NA	NA	NA	NA	NA	NA	NA	NA	NA	NA	NA	NA	NA	NA	NA	NA	NA	NA	NA	NA	NA	Large (above 4 kg)	4.2	8	No	NA	NA	NA	NA	NA	NA	NA	NA
2020/06/22 3:06:52 PM GMT+1	Cat	NA	NA	NA	NA	NA	NA	NA	NA	NA	NA	NA	NA	NA	NA	NA	NA	NA	NA	NA	NA	NA	NA	NA	NA	NA	NA	NA	NA	NA	NA	NA	NA	NA	NA	NA	NA	Large (above 4 kg)	NA	14	Yes	In response to a flea infestation	No	NA	Frontline or Frontline Combo	Frontline or Frontline Combo	2	Online	No
2020/06/22 3:07:00 PM GMT+1	Cat	NA	NA	NA	NA	NA	NA	NA	NA	NA	NA	NA	NA	NA	NA	NA	NA	NA	NA	NA	NA	NA	NA	NA	NA	NA	NA	NA	NA	NA	NA	NA	NA	NA	NA	NA	NA	Small (below 4kg)	2.5	2	Yes	In response to a flea infestation	No	NA	Fipnil/Fipralone/Fiprene/ Fiprex/ Fiproclear/Fiprofile/Fipronil/Fiprotec/Fiproxole/Fleanil/Fleascreen/Flevox/Flick/Fyperix	Frontline generic	3	Online	Yes
2020/06/22 3:08:53 PM GMT+1	Cat	NA	NA	NA	NA	NA	NA	NA	NA	NA	NA	NA	NA	NA	NA	NA	NA	NA	NA	NA	NA	NA	NA	NA	NA	NA	NA	NA	NA	NA	NA	NA	NA	NA	NA	NA	NA	Small (below 4kg)	NA	10	Yes	To prevent fleas (or other pests)	No	NA	Stronghold	Stronghold	2	From a veterinary practice	No
2020/06/22 3:09:00 PM GMT+1	Cat	NA	NA	NA	NA	NA	NA	NA	NA	NA	NA	NA	NA	NA	NA	NA	NA	NA	NA	NA	NA	NA	NA	NA	NA	NA	NA	NA	NA	NA	NA	NA	NA	NA	NA	NA	NA	Large (above 4 kg)	4.5	7	Yes	To prevent fleas (or other pests)	No	NA	Advocate	Advocate	7	From a veterinary practice	No
2020/06/22 3:09:04 PM GMT+1	Cat	NA	NA	NA	NA	NA	NA	NA	NA	NA	NA	NA	NA	NA	NA	NA	NA	NA	NA	NA	NA	NA	NA	NA	NA	NA	NA	NA	NA	NA	NA	NA	NA	NA	NA	NA	NA	Small (below 4kg)	2.6	11	Yes	Other reason	No	NA	Advantage;Bob Martin Clear / Clear Plus (Fipronil);Frontline or Frontline Combo	Bob Martin Clear / Clear Plus (Fipronil)	7	Online	Yes
2020/06/22 3:09:10 PM GMT+1	Cat	NA	NA	NA	NA	NA	NA	NA	NA	NA	NA	NA	NA	NA	NA	NA	NA	NA	NA	NA	NA	NA	NA	NA	NA	NA	NA	NA	NA	NA	NA	NA	NA	NA	NA	NA	NA	Large (above 4 kg)	6	5	Yes	In response to a flea infestation	No	NA	Advantage	Advantage	1	From a petshop	Yes
2020/06/22 3:10:10 PM GMT+1	Cat	NA	NA	NA	NA	NA	NA	NA	NA	NA	NA	NA	NA	NA	NA	NA	NA	NA	NA	NA	NA	NA	NA	NA	NA	NA	NA	NA	NA	NA	NA	NA	NA	NA	NA	NA	NA	Large (above 4 kg)	NA	16	Yes	To prevent fleas (or other pests)	No	NA	Advantage;Stronghold	Advantage	8	From a veterinary practice	No
2020/06/22 3:10:26 PM GMT+1	Cat	NA	NA	NA	NA	NA	NA	NA	NA	NA	NA	NA	NA	NA	NA	NA	NA	NA	NA	NA	NA	NA	NA	NA	NA	NA	NA	NA	NA	NA	NA	NA	NA	NA	NA	NA	NA	Small (below 4kg)	3.8	19	Yes	To prevent fleas (or other pests)	No	NA	Advocate	Advocate	6	From a veterinary practice	No
2020/06/22 3:10:31 PM GMT+1	Dog	Large (20-40kg)	24	4	Yes	In response to other pests (eg ticks)	No	NA	Bravecto tablet	Bravecto tablet	2	From a veterinary practice	NA	NA	NA	NA	No	No	NA	Yes	June;September	2	In their own bed	In their own bed	Every 6 months	Every day	Every 6 months	Outdoors	Every week or more	2 hours	3 hours	Mainly on unpaved surfaces like field margins, forest tracks or the beach	Yes, I will walk my dog in light drizzle	9	Bag and bin (specific dog poo bin);Bag and bin (home council bin)	Bag and bin (home council bin)	No	NA	NA	NA	NA	NA	NA	NA	NA	NA	NA	NA	NA
2020/06/22 3:10:43 PM GMT+1	Dog	Small (4-10kg)	10	5	Yes	To prevent fleas (or other pests)	No	NA	Bravecto tablet	Bravecto tablet	4	Online	NA	NA	NA	NA	No	No	NA	No	NA	2	On a family member's bed	On a family member's bed	Every week or more	Every day	Every month	In a bath, sink or shower	Every week or more	1 hour	2 hours	Mainly on unpaved surfaces like field margins, forest tracks or the beach	Yes, I walk my dog even if it is raining heavily and my dog gets completely wet	8	Bag and bin (specific dog poo bin);Bag and bin (home council bin)	Bag and bin (specific dog poo bin)	No	NA	NA	NA	NA	NA	NA	NA	NA	NA	NA	NA	NA
2020/06/22 3:11:19 PM GMT+1	Dog	Medium (10-20 kg)	12	9	Yes	To prevent fleas (or other pests)	No	NA	Bravecto tablet	Bravecto tablet	3	From a veterinary practice	NA	NA	NA	NA	Yes	No	NA	No	NA	None	On a family member's bed	On a family member's bed	Every 3 months	Every day	Every month	In a bath, sink or shower	Every week or more	2 hours	3 hours	An equal mixture of the above	Yes, I will walk my dog in light drizzle	9	Bag and bin (specific dog poo bin);Bag and bin (home council bin)	Bag and bin (home council bin)	No	NA	NA	NA	NA	NA	NA	NA	NA	NA	NA	NA	NA
2020/06/22 3:12:22 PM GMT+1	Dog	Large (20-40kg)	34	12	Yes	To prevent fleas (or other pests)	No	NA	Bravecto tablet	Bravecto tablet	4	Online	NA	NA	NA	NA	No	No	NA	Yes	August	4	On the furniture;On a family member's bed;On the floor	On the furniture	Every month	Every day	Every month	Outdoors	Every month	2 hours	3 hours	Mainly on unpaved surfaces like field margins, forest tracks or the beach	Yes, I walk my dog even if it is raining heavily and my dog gets completely wet	10	Bag and bin (specific dog poo bin);Bag and bin (home council bin)	Bag and bin (home council bin)	No	NA	NA	NA	NA	NA	NA	NA	NA	NA	NA	NA	NA
2020/06/22 3:17:19 PM GMT+1	Dog	Small (4-10kg)	9	2	Yes	In response to other pests (eg ticks)	No	NA	NexGard Spectra	NexGard Spectra	12	From a veterinary practice	NA	NA	NA	NA	No	No	NA	Yes	March;April;May;June;July;August;September	4	On a family member's bed	On a family member's bed	Every month	Every day	Every month	In a bath, sink or shower	Every 3 months	1 hour	2 hours	Mainly on unpaved surfaces like field margins, forest tracks or the beach	Yes, I walk my dog even if it is raining heavily and my dog gets completely wet	10	Bag and bin (home council bin)	Bag and bin (home council bin)	No	NA	NA	NA	NA	NA	NA	NA	NA	NA	NA	NA	NA
2020/06/22 3:17:33 PM GMT+1	Cat	NA	NA	NA	NA	NA	NA	NA	NA	NA	NA	NA	NA	NA	NA	NA	NA	NA	NA	NA	NA	NA	NA	NA	NA	NA	NA	NA	NA	NA	NA	NA	NA	NA	NA	NA	NA	Large (above 4 kg)	4.2	8	Yes	To prevent fleas (or other pests)	No	NA	Bravecto	Bravecto	4	From a veterinary practice	Yes
2020/06/22 3:18:59 PM GMT+1	Dog	Large (20-40kg)	37	2	Yes	To prevent fleas (or other pests)	No	NA	Itch - flea	Itch - flea	4	Online	Yes	Yes	Yes	NA	No	No	NA	No	NA	4	In their own bed;On the furniture;On a family member's bed;On the floor	On a family member's bed	Every 2 weeks	Every day	Every week or more	In a bath, sink or shower	Every week or more	2 hours	6 hours	Mainly on unpaved surfaces like field margins, forest tracks or the beach	Yes, I walk my dog even if it is raining heavily and my dog gets completely wet	10	Bag and bin (specific dog poo bin);Bag and bin (home council bin);Straight in a bin (of any kind)	Bag and bin (specific dog poo bin)	No	NA	NA	NA	NA	NA	NA	NA	NA	NA	NA	NA	NA
2020/06/22 3:19:09 PM GMT+1	Dog	Large (20-40kg)	25	3	Yes	To prevent fleas (or other pests)	No	NA	NexGard Spectra	NexGard Spectra	12	From a veterinary practice	NA	NA	NA	NA	Yes	No	NA	No	NA	2	In their own bed;On the furniture;On a family member's bed	On a family member's bed	Every 3 months	Every day	Every 3 months	In a bath, sink or shower	Every 2 weeks	2 hours	3 hours	Mainly on unpaved surfaces like field margins, forest tracks or the beach	Yes, I walk my dog even if it is raining heavily and my dog gets completely wet	10	Bag and bin (specific dog poo bin);Bag and bin (home council bin)	Bag and bin (specific dog poo bin)	No	NA	NA	NA	NA	NA	NA	NA	NA	NA	NA	NA	NA
2020/06/22 3:20:10 PM GMT+1	Dog	Medium (10-20 kg)	17	2	Yes	In response to other pests (eg ticks)	Yes	Billy no mates	Bravecto tablet;Billy no mates and apple cider vinegar with water and essential oil	Bravecto tablet	3	From a veterinary practice	NA	NA	NA	NA	No	No	NA	No	NA	4	On the furniture	In their own bed	Every 2 weeks	Every day	Every month	In a bath, sink or shower	Never	1 hour	2 hours	An equal mixture of the above	Yes, I will walk my dog in light drizzle	10	Bag and bin (specific dog poo bin);Bag and bin (home council bin)	Bag and bin (specific dog poo bin)	No	NA	NA	NA	NA	NA	NA	NA	NA	NA	NA	NA	NA
2020/06/22 3:20:41 PM GMT+1	Cat	NA	NA	NA	NA	NA	NA	NA	NA	NA	NA	NA	NA	NA	NA	NA	NA	NA	NA	NA	NA	NA	NA	NA	NA	NA	NA	NA	NA	NA	NA	NA	NA	NA	NA	NA	NA	Large (above 4 kg)	5	11	Yes	To prevent fleas (or other pests)	No	NA	Bob Martin Clear / Clear Plus (Fipronil)	Bob Martin Clear / Clear Plus (Fipronil)	2	From a supermarket	No
2020/06/22 3:20:55 PM GMT+1	Dog	Small (4-10kg)	4	11	Yes	In response to other pests (eg ticks)	No	NA	Frontline or Frontline Combo spot on	Frontline or Frontline Combo spot on	10	From a veterinary practice	No	Yes	Yes	NA	Yes	Yes	May	Yes	May	4	In their own bed	In their own bed	Every month	Every day	Every 3 months	In a bath, sink or shower	Less than once a year	1 hour	3 hours	Mainly on unpaved surfaces like field margins, forest tracks or the beach	Yes, I walk my dog even if it is raining heavily and my dog gets completely wet	1	Bury in the ground	Bury in the ground	No	NA	NA	NA	NA	NA	NA	NA	NA	NA	NA	NA	NA
2020/06/22 3:20:55 PM GMT+1	Dog	Large (20-40kg)	30	2	Yes	In response to other pests (eg ticks)	No	NA	Bravecto tablet	Bravecto tablet	4	From a veterinary practice	NA	NA	NA	NA	No	No	NA	No	NA	4	On the furniture;On the floor	On the furniture	Every 6 months	Every day	Every 2 weeks	Outdoors	Every week or more	1 hour	3 hours	Mainly on unpaved surfaces like field margins, forest tracks or the beach	Yes, I will walk my dog in light drizzle	9	Bag and bin (specific dog poo bin);Bag and bin (home council bin)	Bag and bin (home council bin)	No	NA	NA	NA	NA	NA	NA	NA	NA	NA	NA	NA	NA
2020/06/22 3:20:58 PM GMT+1	Cat	NA	NA	NA	NA	NA	NA	NA	NA	NA	NA	NA	NA	NA	NA	NA	NA	NA	NA	NA	NA	NA	NA	NA	NA	NA	NA	NA	NA	NA	NA	NA	NA	NA	NA	NA	NA	Small (below 4kg)	4	9	Yes	To prevent fleas (or other pests)	No	NA	Frontline or Frontline Combo	Frontline or Frontline Combo	9	Online	No
2020/06/22 3:21:38 PM GMT+1	Dog	Large (20-40kg)	16	<1	Yes	To prevent fleas (or other pests)	No	NA	Bravecto tablet;Itch - flea	Itch - flea	2	Online	Yes	Yes	Yes	NA	No	No	NA	Yes	May	4	In their own bed;On the furniture;On a family member's bed;On the floor	On a family member's bed	Every 2 weeks	Every day	Every month	In a bath, sink or shower	Every week or more	30 minutes	6 hours	Mainly on unpaved surfaces like field margins, forest tracks or the beach	Yes, I walk my dog even if it is raining heavily and my dog gets completely wet	10	Bag and bin (specific dog poo bin);Bag and bin (home council bin);Straight in a bin (of any kind);Flush down the toilet	Bag and bin (specific dog poo bin)	No	NA	NA	NA	NA	NA	NA	NA	NA	NA	NA	NA	NA
2020/06/22 3:22:22 PM GMT+1	Dog	Large (20-40kg)	24	14	Yes	To prevent fleas (or other pests)	No	NA	Bravecto tablet	Bravecto tablet	4	From a veterinary practice	NA	NA	NA	NA	No	No	NA	Yes	April;May;June;July;August;September;October	4	In their own bed	In their own bed	Every 2 weeks	Every day	Every month	In a bath, sink or shower	Every week or more	2 hours	6 hours	Mainly on unpaved surfaces like field margins, forest tracks or the beach	Yes, I walk my dog even if it is raining heavily and my dog gets completely wet	10	Bag and bin (specific dog poo bin);Straight in a bin (of any kind)	Bag and bin (specific dog poo bin)	No	NA	NA	NA	NA	NA	NA	NA	NA	NA	NA	NA	NA
2020/06/22 3:22:52 PM GMT+1	Dog	Large (20-40kg)	37	2	Yes	To prevent fleas (or other pests)	No	NA	Bravecto tablet;Bravecto spot on	Bravecto spot on	4	From a veterinary practice	No	Yes	Yes	NA	No	No	NA	Yes	June;July	4	On the floor	On the floor	Every 3 months	Every day	Every month	At the groomers	Every 2 weeks	2 hours	3 hours	An equal mixture of the above	Yes, I will walk my dog in light drizzle	10	Bag and bin (home council bin)	Bag and bin (home council bin)	No	NA	NA	NA	NA	NA	NA	NA	NA	NA	NA	NA	NA
2020/06/22 3:22:59 PM GMT+1	Dog	Small (4-10kg)	9.8	7	Yes	To prevent fleas (or other pests)	No	NA	Advocate;NexGard Spectra	NexGard Spectra	12	From a veterinary practice	NA	Yes	Yes	NA	No	No	NA	No	NA	12	In their own bed;On the furniture;On the floor	In their own bed	Every 2 weeks	Every day	Every 2 weeks	In a bath, sink or shower	Every 2 weeks	1 hour	1 hour	An equal mixture of the above	Yes, I will walk my dog in light drizzle	5	Bag and bin (specific dog poo bin);Bag and bin (home council bin)	Bag and bin (specific dog poo bin)	No	NA	NA	NA	NA	NA	NA	NA	NA	NA	NA	NA	NA
2020/06/22 3:23:09 PM GMT+1	Cat	NA	NA	NA	NA	NA	NA	NA	NA	NA	NA	NA	NA	NA	NA	NA	NA	NA	NA	NA	NA	NA	NA	NA	NA	NA	NA	NA	NA	NA	NA	NA	NA	NA	NA	NA	NA	Large (above 4 kg)	4.6	12	No	NA	NA	NA	NA	NA	NA	NA	NA
2020/06/22 3:24:09 PM GMT+1	Dog	Medium (10-20 kg)	20	9	Yes	To prevent fleas (or other pests)	No	NA	NexGard Spectra	NexGard Spectra	4	From a veterinary practice	Yes	Yes	Yes	NA	No	No	NA	No	NA	4	In their own bed;On the furniture;On a family member's bed;On the floor	On the furniture	Every month	Every day	Every 6 months	In a bath, sink or shower	Once a year	1 hour	6 hours	Mainly on unpaved surfaces like field margins, forest tracks or the beach	Occasionally, but I try to avoid this	8	Bag and bin (specific dog poo bin);Bag and bin (home council bin);Bury in the ground	Bag and bin (home council bin)	No	NA	NA	NA	NA	NA	NA	NA	NA	NA	NA	NA	NA
2020/06/22 3:24:46 PM GMT+1	Dog	Large (20-40kg)	30	10	Yes	In response to other pests (eg ticks)	Yes	Skinny dip spray	NexGard Spectra	NexGard Spectra	6	From a veterinary practice	NA	NA	NA	NA	No	No	NA	Yes	May;June	2	In their own bed;On the furniture;On the floor	In their own bed	Every 2 weeks	Every day	Every week or more	Outdoors	Every week or more	2 hours	3 hours	Mainly on unpaved surfaces like field margins, forest tracks or the beach	Yes, I walk my dog even if it is raining heavily and my dog gets completely wet	9	Bag and bin (specific dog poo bin);Bag and bin (home council bin);Bury in the ground	Bury in the ground	No	NA	NA	NA	NA	NA	NA	NA	NA	NA	NA	NA	NA
2020/06/22 3:25:12 PM GMT+1	Dog	Medium (10-20 kg)	12	4	Yes	In response to a flea infestation	No	NA	Bob Martin Clear /Clear Plus (Fipronil);NexGard	Bob Martin Clear /Clear Plus (Fipronil)	6	From a supermarket	No	Yes	Yes	NA	Yes	Yes	July	Yes	May;June;July	Don't know	In their own bed;On the furniture;On the floor	In their own bed	Every month	Every day	Every week or more	In a bath, sink or shower	Every week or more	2 hours	3 hours	Mainly on unpaved surfaces like field margins, forest tracks or the beach	Yes, I walk my dog even if it is raining heavily and my dog gets completely wet	6	Bag and bin (specific dog poo bin);Bury in the ground	Bury in the ground	No	NA	NA	NA	NA	NA	NA	NA	NA	NA	NA	NA	NA
2020/06/22 3:25:37 PM GMT+1	Dog	Medium (10-20 kg)	17.2	5	Yes	To prevent fleas (or other pests)	No	NA	NexGard Spectra	NexGard Spectra	10	From a veterinary practice	NA	NA	NA	NA	No	No	NA	No	NA	10	On the furniture;On a family member's bed;On the floor	On a family member's bed	Every month	Every day	Every 2 weeks	In a bath, sink or shower	Every week or more	1 hour	1 hour	An equal mixture of the above	Yes, I will walk my dog in light drizzle	10	Bag and bin (specific dog poo bin);Bag and bin (home council bin)	Bag and bin (home council bin)	No	NA	NA	NA	NA	NA	NA	NA	NA	NA	NA	NA	NA
2020/06/22 3:26:12 PM GMT+1	Cat	NA	NA	NA	NA	NA	NA	NA	NA	NA	NA	NA	NA	NA	NA	NA	NA	NA	NA	NA	NA	NA	NA	NA	NA	NA	NA	NA	NA	NA	NA	NA	NA	NA	NA	NA	NA	Small (below 4kg)	3	6	Yes	In response other pests (eg ticks)	No	NA	Frontline or Frontline Combo	Frontline or Frontline Combo	10	From a veterinary practice	No
2020/06/22 3:26:34 PM GMT+1	Dog	Small (4-10kg)	7	9	Yes	In response to other pests (eg ticks)	No	NA	Bravecto tablet;Easecto	Bravecto tablet	3	Online	NA	NA	NA	NA	No	Yes	August;September	Yes	May	2	In their own bed	In their own bed	Every 3 months	Every day	Every 3 months	In a bath, sink or shower	Never	30 minutes	6 hours	An equal mixture of the above	Never	7	Bag and bin (home council bin)	Bag and bin (home council bin)	No	NA	NA	NA	NA	NA	NA	NA	NA	NA	NA	NA	NA
2020/06/22 3:26:35 PM GMT+1	Cat	NA	NA	NA	NA	NA	NA	NA	NA	NA	NA	NA	NA	NA	NA	NA	NA	NA	NA	NA	NA	NA	NA	NA	NA	NA	NA	NA	NA	NA	NA	NA	NA	NA	NA	NA	NA	Small (below 4kg)	NA	7	Yes	In response to a flea infestation	No	NA	Frontline or Frontline Combo	Frontline or Frontline Combo	1	From a petshop	No
2020/06/22 3:26:36 PM GMT+1	Dog	Large (20-40kg)	32	8	Yes	To prevent fleas (or other pests)	No	NA	Frontline or Frontline Combo spot on	Frontline or Frontline Combo spot on	4	Online	Yes	Yes	Yes	NA	Yes	No	NA	No	NA	1	In their own bed;On the furniture;On the floor	On the furniture	Every week or more	Every day	Every month	In a bath, sink or shower	Every week or more	30 minutes	2 hours	Mainly on unpaved surfaces like field margins, forest tracks or the beach	Yes, I will walk my dog in light drizzle	5	Bag and bin (specific dog poo bin);Bag and bin (home council bin)	Bag and bin (home council bin)	No	NA	NA	NA	NA	NA	NA	NA	NA	NA	NA	NA	NA
2020/06/22 3:27:52 PM GMT+1	Dog	Large (20-40kg)	24	12	Yes	To prevent fleas (or other pests)	No	NA	Frontline or Frontline Combo spot on	Frontline or Frontline Combo spot on	3	Online	Yes	Yes	Yes	NA	No	No	NA	No	NA	3	In their own bed	In their own bed	Every 3 months	Every week	Once a year	In a bath, sink or shower	Never	30 minutes	2 hours	An equal mixture of the above	Occasionally, but I try to avoid this	10	Bag and bin (specific dog poo bin);Bag and bin (home council bin)	Bag and bin (home council bin)	No	NA	NA	NA	NA	NA	NA	NA	NA	NA	NA	NA	NA
2020/06/22 3:30:47 PM GMT+1	Dog	Small (4-10kg)	10	6	Yes	To prevent fleas (or other pests)	No	NA	Advocate	Advocate	12	Online	Yes	Yes	Yes	NA	No	No	NA	No	NA	None	On a family member's bed	On a family member's bed	Every 6 months	Every day	Every 3 months	At the groomers	Never	30 minutes	1 hour	An equal mixture of the above	Occasionally, but I try to avoid this	10	Bag and bin (specific dog poo bin);Bag and bin (home council bin)	Bag and bin (specific dog poo bin)	No	NA	NA	NA	NA	NA	NA	NA	NA	NA	NA	NA	NA
2020/06/22 3:31:20 PM GMT+1	Cat	NA	NA	NA	NA	NA	NA	NA	NA	NA	NA	NA	NA	NA	NA	NA	NA	NA	NA	NA	NA	NA	NA	NA	NA	NA	NA	NA	NA	NA	NA	NA	NA	NA	NA	NA	NA	Small (below 4kg)	NA	13	Yes	To prevent fleas (or other pests)	No	NA	Stronghold	Stronghold	12	From a veterinary practice	Yes
2020/06/22 3:32:30 PM GMT+1	Dog	Large (20-40kg)	25	5	Yes	In response to other pests (eg ticks)	No	NA	Seresto collar	Seresto collar	1	From a veterinary practice	NA	No	NA	NA	No	No	NA	Yes	September;October	5	In their own bed	In their own bed	Every month	Every day	Every week or more	Outdoors	Every week or more	1 hour	3 hours	Mainly on unpaved surfaces like field margins, forest tracks or the beach	Yes, I walk my dog even if it is raining heavily and my dog gets completely wet	10	Bag and bin (specific dog poo bin);Bag and bin (home council bin)	Bag and bin (specific dog poo bin)	Yes	NA	NA	NA	NA	NA	NA	NA	NA	NA	NA	NA	NA
2020/06/22 3:32:49 PM GMT+1	Cat	NA	NA	NA	NA	NA	NA	NA	NA	NA	NA	NA	NA	NA	NA	NA	NA	NA	NA	NA	NA	NA	NA	NA	NA	NA	NA	NA	NA	NA	NA	NA	NA	NA	NA	NA	NA	Large (above 4 kg)	4.4	5	Yes	To prevent fleas (or other pests)	No	NA	Advantage	Advantage	6	From a veterinary practice	Yes
2020/06/22 3:33:09 PM GMT+1	Dog	Medium (10-20 kg)	11	4	Yes	To prevent fleas (or other pests)	No	NA	Bravecto tablet	Bravecto tablet	4	From a veterinary practice	NA	NA	NA	NA	No	No	NA	No	NA	12	In their own bed;On the furniture;On a family member's bed;On the floor;In a crate	In a crate	Every 2 weeks	Every day	Every month	Outdoors	Less than once a year	1 hour	2 hours	Mainly on unpaved surfaces like field margins, forest tracks or the beach	Yes, I will walk my dog in light drizzle	10	Bag and bin (specific dog poo bin);Bag and bin (home council bin);Straight in a bin (of any kind)	Bag and bin (home council bin)	Yes	NA	NA	NA	NA	NA	NA	NA	NA	NA	NA	NA	NA
2020/06/22 3:33:25 PM GMT+1	Dog	Medium (10-20 kg)	14	10	Yes	To prevent fleas (or other pests)	No	NA	Advocate	Advocate	12	From a veterinary practice	Yes	Yes	Yes	NA	No	No	NA	No	NA	2	In their own bed;On the furniture	In their own bed	Every 2 weeks	Every day	Every month	At the groomers	Every 6 months	1 hour	2 hours	An equal mixture of the above	Yes, I will walk my dog in light drizzle	10	Bag and bin (specific dog poo bin);Bag and bin (home council bin)	Bag and bin (specific dog poo bin)	No	NA	NA	NA	NA	NA	NA	NA	NA	NA	NA	NA	NA
2020/06/22 3:33:36 PM GMT+1	Dog	Large (20-40kg)	20	7	No	NA	NA	NA	NA	NA	NA	NA	NA	NA	NA	NA	No	No	NA	Yes	September	None	In their own bed;On the furniture;On a family member's bed;On the floor;Outdoors kennel/building	In their own bed	Every 3 months	Every day	Once a year	Outdoors	Every 6 months	1 hour	6 hours	Mainly on unpaved surfaces like field margins, forest tracks or the beach	Occasionally, but I try to avoid this	6	Bag and bin (specific dog poo bin);Bag and bin (home council bin)	Bag and bin (home council bin)	No	NA	NA	NA	NA	NA	NA	NA	NA	NA	NA	NA	NA
2020/06/22 3:33:54 PM GMT+1	Dog	Small (4-10kg)	9	4	Yes	To prevent fleas (or other pests)	No	NA	Advocate	Advocate	2	From a veterinary practice	No	No	NA	NA	No	No	NA	No	NA	2	In their own bed	In their own bed	Every 6 months	Every day	Every month	In a bath, sink or shower	Less than once a year	1 hour	6 hours	An equal mixture of the above	Occasionally, but I try to avoid this	10	Bag and bin (specific dog poo bin);Bag and bin (home council bin)	Bag and bin (home council bin)	No	NA	NA	NA	NA	NA	NA	NA	NA	NA	NA	NA	NA
2020/06/22 3:34:07 PM GMT+1	Cat	NA	NA	NA	NA	NA	NA	NA	NA	NA	NA	NA	NA	NA	NA	NA	NA	NA	NA	NA	NA	NA	NA	NA	NA	NA	NA	NA	NA	NA	NA	NA	NA	NA	NA	NA	NA	Large (above 4 kg)	5.25	7	Yes	To prevent fleas (or other pests)	No	NA	Broadline	Broadline	3	From a veterinary practice	Yes
2020/06/22 3:36:57 PM GMT+1	Dog	Large (20-40kg)	24	17	No	NA	NA	NA	NA	NA	NA	NA	NA	NA	NA	NA	No	No	NA	No	NA	12	In their own bed	On the floor	Every 3 months	Every day	Every month	Outdoors	Every 2 weeks	10 minutes	2 hours	An equal mixture of the above	Yes, I walk my dog even if it is raining heavily and my dog gets completely wet	3	Bag and bin (specific dog poo bin)	Bag and bin (specific dog poo bin)	Yes	NA	NA	NA	NA	NA	NA	NA	NA	NA	NA	NA	NA
2020/06/22 3:37:01 PM GMT+1	Dog	Small (4-10kg)	8	5	Yes	In response to a flea infestation	No	NA	Advocate;Frontline or Frontline Combo spot on	Advocate	4	From a veterinary practice	Don't know	Yes	Yes	NA	Yes	Yes	May	Yes	May	2	In their own bed	In their own bed	Don't know	Every week	Every 3 months	In a bath, sink or shower	Less than once a year	Don't know	Over 12 hours	Mainly on unpaved surfaces like field margins, forest tracks or the beach	Yes, I walk my dog even if it is raining heavily and my dog gets completely wet	Don't know	None of the above/don't know	None of the above/don't know	Yes	NA	NA	NA	NA	NA	NA	NA	NA	NA	NA	NA	NA
2020/06/22 3:39:17 PM GMT+1	Dog	Small (4-10kg)	7	10	Yes	In response to other pests (eg ticks)	No	NA	Bravecto tablet;Don't know	Bravecto tablet	4	From a veterinary practice	NA	NA	NA	NA	No	No	NA	No	NA	4	In their own bed;On the furniture;On the floor	In their own bed	Every 3 months	Every day	Every month	In a bath, sink or shower	Never	1 hour	2 hours	Mainly on unpaved surfaces like field margins, forest tracks or the beach	Yes, I walk my dog even if it is raining heavily and my dog gets completely wet	9	Bag and bin (specific dog poo bin);Bag and bin (home council bin);Straight in a bin (of any kind)	Bag and bin (specific dog poo bin)	No	NA	NA	NA	NA	NA	NA	NA	NA	NA	NA	NA	NA
2020/06/22 3:40:31 PM GMT+1	Dog	Medium (10-20 kg)	8	10	Yes	To prevent fleas (or other pests)	No	NA	Advocate	Advocate	4	Online	Yes	No	NA	NA	No	No	NA	No	NA	4	In their own bed;On the floor;Outdoors kennel/building;In a crate	On the floor	Every 2 weeks	Every day	Every 3 months	In a bath, sink or shower	Never	30 minutes	2 hours	Mainly on paved surfaces	Yes, I will walk my dog in light drizzle	10	Bag and bin (specific dog poo bin)	Bag and bin (home council bin)	No	NA	NA	NA	NA	NA	NA	NA	NA	NA	NA	NA	NA
2020/06/22 3:41:30 PM GMT+1	Dog	Medium (10-20 kg)	12	13	No	NA	NA	NA	NA	NA	NA	NA	NA	NA	NA	NA	No	No	NA	Yes	May	1	On a family member's bed	On a family member's bed	Every month	Every day	Every 3 months	Outdoors	Every 2 weeks	1 hour	1 hour	Mainly on unpaved surfaces like field margins, forest tracks or the beach	Occasionally, but I try to avoid this	7	Bag and bin (specific dog poo bin)	Bag and bin (home council bin)	No	NA	NA	NA	NA	NA	NA	NA	NA	NA	NA	NA	NA
2020/06/22 3:42:52 PM GMT+1	Dog	Large (20-40kg)	30	<1	Yes	In response to other pests (eg ticks)	No	NA	NexGard Spectra	NexGard Spectra	5	From a veterinary practice	Don't know	Yes	Yes	NA	No	No	NA	Yes	May;June;July;August;September;October	5	In their own bed;On the furniture;On the floor	On the furniture	Every 2 weeks	Every day	Every week or more	Outdoors	Every 3 months	2 hours	3 hours	An equal mixture of the above	Yes, I walk my dog even if it is raining heavily and my dog gets completely wet	3	Bag and bin (specific dog poo bin);Bag and bin (home council bin)	Bag and bin (home council bin)	No	NA	NA	NA	NA	NA	NA	NA	NA	NA	NA	NA	NA
2020/06/22 3:42:59 PM GMT+1	Cat	NA	NA	NA	NA	NA	NA	NA	NA	NA	NA	NA	NA	NA	NA	NA	NA	NA	NA	NA	NA	NA	NA	NA	NA	NA	NA	NA	NA	NA	NA	NA	NA	NA	NA	NA	NA	Small (below 4kg)	3.2	4	Yes	In response to a flea infestation	No	NA	Prinovox	Prinovox	7	From a veterinary practice	Yes
2020/06/22 3:43:11 PM GMT+1	Cat	NA	NA	NA	NA	NA	NA	NA	NA	NA	NA	NA	NA	NA	NA	NA	NA	NA	NA	NA	NA	NA	NA	NA	NA	NA	NA	NA	NA	NA	NA	NA	NA	NA	NA	NA	NA	Large (above 4 kg)	6	6	No	NA	NA	NA	NA	NA	NA	NA	NA
2020/06/22 3:44:01 PM GMT+1	Dog	Medium (10-20 kg)	17	7	Yes	In response to a flea infestation	No	NA	Frontline or Frontline Combo spot on	Frontline or Frontline Combo spot on	1	Online	Yes	Yes	Yes	NA	Yes	Yes	May;June	Yes	April;May;June;July	2	In their own bed;On the furniture;On the floor;In a crate	On the floor	Every 3 months	Every day	Every month	In a bath, sink or shower	Every week or more	2 hours	3 hours	Mainly on unpaved surfaces like field margins, forest tracks or the beach	Yes, I walk my dog even if it is raining heavily and my dog gets completely wet	8	Straight in a bin (of any kind)	Bag and bin (home council bin)	Yes	NA	NA	NA	NA	NA	NA	NA	NA	NA	NA	NA	NA
2020/06/22 3:44:57 PM GMT+1	Dog	Medium (10-20 kg)	17	7	Yes	In response to a flea infestation	No	NA	Itch - flea	Itch - flea	2	Online	Yes	Yes	Yes	NA	Yes	Yes	June	No	NA	1	In their own bed;On the furniture;On a family member's bed;On the floor;In a crate	On the furniture	Every 2 weeks	Every day	Every month	In a bath, sink or shower	Every week or more	1 hour	2 hours	An equal mixture of the above	Occasionally, but I try to avoid this	10	Bag and bin (home council bin);Straight in a bin (of any kind)	Bag and bin (home council bin)	Yes	NA	NA	NA	NA	NA	NA	NA	NA	NA	NA	NA	NA
2020/06/22 3:45:26 PM GMT+1	Cat	NA	NA	NA	NA	NA	NA	NA	NA	NA	NA	NA	NA	NA	NA	NA	NA	NA	NA	NA	NA	NA	NA	NA	NA	NA	NA	NA	NA	NA	NA	NA	NA	NA	NA	NA	NA	Large (above 4 kg)	5	12	Yes	To prevent fleas (or other pests)	No	NA	Advocate	Advocate	6	From a veterinary practice	No
2020/06/22 3:46:16 PM GMT+1	Dog	Small (4-10kg)	NA	10	Yes	In response to a flea infestation	No	NA	Advocate	Advocate	2	From a veterinary practice	Yes	No	NA	NA	Yes	Yes	Don't know	No	NA	2	In their own bed;On a family member's bed;On the floor	On a family member's bed	Never	Every day	Never	NA	Never	1 hour	3 hours	Mainly on unpaved surfaces like field margins, forest tracks or the beach	Never	2	Bag and bin (home council bin)	Bag and bin (home council bin)	No	NA	NA	NA	NA	NA	NA	NA	NA	NA	NA	NA	NA
2020/06/22 3:46:35 PM GMT+1	Dog	Large (20-40kg)	32	9	Yes	To prevent fleas (or other pests)	No	NA	Frontline or Frontline Combo spot on	Frontline or Frontline Combo spot on	4	From a petshop	Yes	Yes	Yes	NA	No	No	NA	No	NA	1	On a family member's bed	On a family member's bed	Every month	Every day	Every month	Outdoors	Every week or more	2 hours	3 hours	Mainly on unpaved surfaces like field margins, forest tracks or the beach	Occasionally, but I try to avoid this	9	Bag and bin (specific dog poo bin)	Bag and bin (specific dog poo bin)	No	NA	NA	NA	NA	NA	NA	NA	NA	NA	NA	NA	NA
2020/06/22 3:46:45 PM GMT+1	Dog	Large (20-40kg)	24	2	No	NA	NA	NA	NA	NA	NA	NA	NA	NA	NA	NA	No	No	NA	No	NA	None	In their own bed;On the furniture;In a crate	In a crate	Every 3 months	Every day	Every week or more	Outdoors	Every 2 weeks	1 hour	2 hours	An equal mixture of the above	Yes, I walk my dog even if it is raining heavily and my dog gets completely wet	10	Bag and bin (specific dog poo bin);Bag and bin (home council bin)	Bag and bin (specific dog poo bin)	No	NA	NA	NA	NA	NA	NA	NA	NA	NA	NA	NA	NA
2020/06/22 3:47:12 PM GMT+1	Dog	Miniature (< 4 kg)	3.6	4	Yes	In response to a flea infestation	No	NA	Frontline or Frontline Combo spot on	Frontline or Frontline Combo spot on	1	From a petshop	Yes	Yes	Yes	NA	Yes	No	NA	Yes	March	None	In their own bed;On the furniture;On a family member's bed	On a family member's bed	Every 6 months	Every day	Every month	In a bath, sink or shower	Never	1 hour	2 hours	An equal mixture of the above	Yes, I will walk my dog in light drizzle	10	Bag and bin (specific dog poo bin)	Bag and bin (specific dog poo bin)	No	NA	NA	NA	NA	NA	NA	NA	NA	NA	NA	NA	NA
2020/06/22 3:47:34 PM GMT+1	Dog	Large (20-40kg)	40	8	No	NA	NA	NA	NA	NA	NA	NA	NA	NA	NA	NA	Yes	Yes	May	Yes	June	3	In their own bed	In their own bed	Every month	Every day	Every month	In a bath, sink or shower	Less than once a year	2 hours	2 hours	An equal mixture of the above	Yes, I walk my dog even if it is raining heavily and my dog gets completely wet	10	Bag and bin (specific dog poo bin);Bag and bin (home council bin)	Bag and bin (home council bin)	No	NA	NA	NA	NA	NA	NA	NA	NA	NA	NA	NA	NA
2020/06/22 3:51:04 PM GMT+1	Cat	NA	NA	NA	NA	NA	NA	NA	NA	NA	NA	NA	NA	NA	NA	NA	NA	NA	NA	NA	NA	NA	NA	NA	NA	NA	NA	NA	NA	NA	NA	NA	NA	NA	NA	NA	NA	Large (above 4 kg)	5	9	Yes	To prevent fleas (or other pests)	No	NA	Frontline or Frontline Combo	Frontline or Frontline Combo	4	Online	No
2020/06/22 3:52:08 PM GMT+1	Dog	Medium (10-20 kg)	11.8	12	Yes	To prevent fleas (or other pests)	No	NA	NexGard Spectra	NexGard Spectra	11	From a veterinary practice	NA	NA	NA	NA	No	No	NA	No	NA	3	In their own bed;On the furniture;On a family member's bed;On the floor	In their own bed	Every month	Every day	Every month	In a bath, sink or shower	Every week or more	1 hour	2 hours	Mainly on unpaved surfaces like field margins, forest tracks or the beach	Yes, I walk my dog even if it is raining heavily and my dog gets completely wet	5	Bag and bin (specific dog poo bin)	Bag and bin (specific dog poo bin)	No	NA	NA	NA	NA	NA	NA	NA	NA	NA	NA	NA	NA
2020/06/22 3:52:12 PM GMT+1	Cat	NA	NA	NA	NA	NA	NA	NA	NA	NA	NA	NA	NA	NA	NA	NA	NA	NA	NA	NA	NA	NA	NA	NA	NA	NA	NA	NA	NA	NA	NA	NA	NA	NA	NA	NA	NA	Large (above 4 kg)	5.2	5	Yes	To prevent fleas (or other pests)	No	NA	Advocate	Advocate	1	From a veterinary practice	Yes
2020/06/22 3:52:22 PM GMT+1	Dog	Small (4-10kg)	NA	3	Yes	To prevent fleas (or other pests)	No	NA	Prinovox	Prinovox	3	From a veterinary practice	Yes	Yes	Yes	NA	Yes	No	NA	No	NA	1	In their own bed;On the furniture;On a family member's bed	On a family member's bed	Every 6 months	Every day	Never	NA	Every month	3 hours	6 hours	An equal mixture of the above	Yes, I will walk my dog in light drizzle	10	Bag and bin (home council bin)	Bag and bin (home council bin)	No	NA	NA	NA	NA	NA	NA	NA	NA	NA	NA	NA	NA
2020/06/22 3:52:35 PM GMT+1	Dog	Large (20-40kg)	33	10	Yes	To prevent fleas (or other pests)	No	NA	Advocate;Bravecto tablet	Bravecto tablet	4	From a veterinary practice	NA	NA	NA	NA	No	No	NA	No	NA	10	In their own bed;On the floor	In their own bed	Once a year	Every day	Every 3 months	At the groomers	Every month	1 hour	3 hours	Mainly on unpaved surfaces like field margins, forest tracks or the beach	Yes, I will walk my dog in light drizzle	10	Bag and bin (specific dog poo bin);Bag and bin (home council bin);Straight in a bin (of any kind)	Bag and bin (specific dog poo bin)	No	NA	NA	NA	NA	NA	NA	NA	NA	NA	NA	NA	NA
2020/06/22 3:52:51 PM GMT+1	Cat	NA	NA	NA	NA	NA	NA	NA	NA	NA	NA	NA	NA	NA	NA	NA	NA	NA	NA	NA	NA	NA	NA	NA	NA	NA	NA	NA	NA	NA	NA	NA	NA	NA	NA	NA	NA	Large (above 4 kg)	8	6	Yes	To prevent fleas (or other pests)	No	NA	Advocate;Prinovox	Advocate	12	From a veterinary practice	Yes
2020/06/22 3:52:59 PM GMT+1	Dog	Small (4-10kg)	8.3	3	Yes	To prevent fleas (or other pests)	No	NA	NexGard Spectra;Simparica	Simparica	12	From a veterinary practice	NA	NA	NA	NA	No	No	NA	No	NA	12	In their own bed;On the furniture;On a family member's bed;On the floor	In their own bed	Never	Every day	Every 2 weeks	In a bath, sink or shower	Every 2 weeks	2 hours	6 hours	An equal mixture of the above	Yes, I will walk my dog in light drizzle	10	Bag and bin (specific dog poo bin);Bag and bin (home council bin)	Bag and bin (specific dog poo bin)	No	NA	NA	NA	NA	NA	NA	NA	NA	NA	NA	NA	NA
2020/06/22 3:54:06 PM GMT+1	Dog	Medium (10-20 kg)	11	5	Yes	To prevent fleas (or other pests)	No	NA	Advantix	Advantix	6	From a veterinary practice	No	Yes	Yes	NA	No	No	NA	Yes	April;May	4	In their own bed	In their own bed	Every month	Every day	Every 3 months	In a bath, sink or shower	Never	1 hour	1 hour	Mainly on unpaved surfaces like field margins, forest tracks or the beach	Yes, I will walk my dog in light drizzle	10	Bag and bin (specific dog poo bin)	Bag and bin (specific dog poo bin)	No	NA	NA	NA	NA	NA	NA	NA	NA	NA	NA	NA	NA
2020/06/22 3:54:26 PM GMT+1	Cat	NA	NA	NA	NA	NA	NA	NA	NA	NA	NA	NA	NA	NA	NA	NA	NA	NA	NA	NA	NA	NA	NA	NA	NA	NA	NA	NA	NA	NA	NA	NA	NA	NA	NA	NA	NA	Large (above 4 kg)	4.5	3	Yes	In response to a flea infestation	No	NA	Bob Martin Clear / Clear Plus (Fipronil);Fipnil/Fipralone/Fiprene/ Fiprex/ Fiproclear/Fiprofile/Fipronil/Fiprotec/Fiproxole/Fleanil/Fleascreen/Flevox/Flick/Fyperix	Frontline generic	6	Online	Yes
2020/06/22 3:54:51 PM GMT+1	Dog	Medium (10-20 kg)	14	8	Yes	To prevent fleas (or other pests)	No	NA	NexGard Spectra	NexGard Spectra	6	From a veterinary practice	NA	NA	NA	NA	No	No	NA	Yes	May;June;July;August	4	In their own bed	On the floor	Every 2 weeks	Every week	Every month	In a bath, sink or shower	Every 2 weeks	2 hours	3 hours	An equal mixture of the above	Yes, I walk my dog even if it is raining heavily and my dog gets completely wet	10	Bag and bin (specific dog poo bin);Bag and bin (home council bin)	Bag and bin (specific dog poo bin)	No	NA	NA	NA	NA	NA	NA	NA	NA	NA	NA	NA	NA
2020/06/22 3:55:22 PM GMT+1	Dog	Large (20-40kg)	27	8	Yes	To prevent fleas (or other pests)	Yes	Biospotix	Bravecto tablet	Biospotix	12	Online	Yes	Yes	Yes	NA	No	No	NA	No	NA	4	In their own bed;On the furniture;On a family member's bed;On the floor	On the furniture	Every 2 weeks	Every day	Every week or more	In a bath, sink or shower	Every week or more	1 hour	6 hours	An equal mixture of the above	Yes, I will walk my dog in light drizzle	10	Bag and bin (specific dog poo bin);Bag and bin (home council bin)	Bag and bin (home council bin)	No	NA	NA	NA	NA	NA	NA	NA	NA	NA	NA	NA	NA
2020/06/22 3:59:19 PM GMT+1	Cat	NA	NA	NA	NA	NA	NA	NA	NA	NA	NA	NA	NA	NA	NA	NA	NA	NA	NA	NA	NA	NA	NA	NA	NA	NA	NA	NA	NA	NA	NA	NA	NA	NA	NA	NA	NA	Small (below 4kg)	NA	13	Yes	To prevent fleas (or other pests)	No	NA	Advantage;Frontline or Frontline Combo	Frontline or Frontline Combo	2	From a veterinary practice	Yes
2020/06/22 3:59:47 PM GMT+1	Dog	Medium (10-20 kg)	13	6	Yes	To prevent fleas (or other pests)	No	NA	Simparica	Simparica	12	From a veterinary practice	NA	NA	NA	NA	No	No	NA	No	NA	12	In their own bed	In their own bed	Every month	Every day	Every 6 months	At the groomers	Never	30 minutes	2 hours	Mainly on paved surfaces	Never	10	Bag and bin (specific dog poo bin);Bag and bin (home council bin)	Bag and bin (home council bin)	No	NA	NA	NA	NA	NA	NA	NA	NA	NA	NA	NA	NA
2020/06/22 4:02:15 PM GMT+1	Dog	Medium (10-20 kg)	11	6	Yes	In response to a flea infestation	Yes	Billy no mates	Bravecto spot on	Billy no mates	1	From a veterinary practice	Yes	Yes	Yes	NA	Yes	Yes	May	No	NA	None	On the furniture;On a family member's bed;On the floor;In a crate	On the furniture	Every month	Every day	Don't know	At the groomers	Never	2 hours	3 hours	An equal mixture of the above	Yes, I walk my dog even if it is raining heavily and my dog gets completely wet	10	Bag and bin (specific dog poo bin);Bag and bin (home council bin)	Bag and bin (specific dog poo bin)	Yes	NA	NA	NA	NA	NA	NA	NA	NA	NA	NA	NA	NA
2020/06/22 4:02:34 PM GMT+1	Dog	Medium (10-20 kg)	13	10	No	NA	NA	NA	NA	NA	NA	NA	NA	NA	NA	NA	No	No	NA	No	NA	1	In their own bed;On the furniture;On a family member's bed;On the floor	On the furniture	Every 3 months	Every day	Every 3 months	In a bath, sink or shower	Never	1 hour	3 hours	An equal mixture of the above	Yes, I walk my dog even if it is raining heavily and my dog gets completely wet	10	Bag and bin (specific dog poo bin);Straight in a bin (of any kind)	Bag and bin (specific dog poo bin)	No	NA	NA	NA	NA	NA	NA	NA	NA	NA	NA	NA	NA
2020/06/22 4:03:25 PM GMT+1	Cat	NA	NA	NA	NA	NA	NA	NA	NA	NA	NA	NA	NA	NA	NA	NA	NA	NA	NA	NA	NA	NA	NA	NA	NA	NA	NA	NA	NA	NA	NA	NA	NA	NA	NA	NA	NA	Large (above 4 kg)	5.4	10	Yes	In response to a flea infestation	No	NA	Bob Martin Clear / Clear Plus (Fipronil);beaphar	Bob Martin Clear / Clear Plus (Fipronil)	3	Online	Don't know
2020/06/22 4:03:48 PM GMT+1	Cat	NA	NA	NA	NA	NA	NA	NA	NA	NA	NA	NA	NA	NA	NA	NA	NA	NA	NA	NA	NA	NA	NA	NA	NA	NA	NA	NA	NA	NA	NA	NA	NA	NA	NA	NA	NA	Large (above 4 kg)	5	10	Yes	To prevent fleas (or other pests)	No	NA	Bravecto	Bravecto	5	From a veterinary practice	No
2020/06/22 4:03:49 PM GMT+1	Dog	Medium (10-20 kg)	18.5	7	Yes	To prevent fleas (or other pests)	No	NA	NexGard Spectra	NexGard Spectra	3	From a veterinary practice	NA	NA	NA	NA	No	No	NA	No	NA	2	In their own bed;On the furniture;On a family member's bed	On the furniture	Every month	Every day	Every 3 months	In a bath, sink or shower	Once a year	1 hour	3 hours	Mainly on unpaved surfaces like field margins, forest tracks or the beach	Yes, I walk my dog even if it is raining heavily and my dog gets completely wet	10	Bag and bin (specific dog poo bin)	Bag and bin (specific dog poo bin)	No	NA	NA	NA	NA	NA	NA	NA	NA	NA	NA	NA	NA
2020/06/22 4:04:01 PM GMT+1	Dog	Large (20-40kg)	35	3	Yes	To prevent fleas (or other pests)	No	NA	NexGard	NexGard	12	From a veterinary practice	NA	NA	NA	NA	No	No	NA	No	NA	4	In their own bed	In their own bed	Every 2 weeks	Every day	Every month	At the groomers	Every month	2 hours	Don't know	An equal mixture of the above	Yes, I will walk my dog in light drizzle	10	Bag and bin (specific dog poo bin)	Bag and bin (specific dog poo bin)	No	NA	NA	NA	NA	NA	NA	NA	NA	NA	NA	NA	NA
2020/06/22 4:04:31 PM GMT+1	Cat	NA	NA	NA	NA	NA	NA	NA	NA	NA	NA	NA	NA	NA	NA	NA	NA	NA	NA	NA	NA	NA	NA	NA	NA	NA	NA	NA	NA	NA	NA	NA	NA	NA	NA	NA	NA	Small (below 4kg)	NA	10	Yes	In response to a flea infestation	No	NA	Activyl;Frontline or Frontline Combo	Activyl	3	Online	Yes
2020/06/22 4:04:37 PM GMT+1	Dog	Medium (10-20 kg)	10.2	7	Yes	To prevent fleas (or other pests)	No	NA	Seresto collar	Seresto collar	2	From a veterinary practice	NA	Yes	NA	NA	No	No	NA	No	NA	10	In their own bed;On the furniture;On a family member's bed;In a crate	In a crate	Every month	Every day	Every week or more	In a bath, sink or shower	Every week or more	2 hours	2 hours	Mainly on unpaved surfaces like field margins, forest tracks or the beach	Yes, I will walk my dog in light drizzle	10	Bag and bin (home council bin)	Bag and bin (home council bin)	No	NA	NA	NA	NA	NA	NA	NA	NA	NA	NA	NA	NA
2020/06/22 4:06:06 PM GMT+1	Dog	Large (20-40kg)	25	2	Yes	To prevent fleas (or other pests)	No	NA	Advocate	Advocate	12	From a veterinary practice	Yes	No	NA	NA	No	No	NA	No	NA	2	In their own bed;On the furniture;On the floor	On the furniture	Every 3 months	Every day	Every 6 months	Outdoors	Never	1 hour	3 hours	Mainly on unpaved surfaces like field margins, forest tracks or the beach	Occasionally, but I try to avoid this	9	Bag and bin (specific dog poo bin);Bag and bin (home council bin)	Bag and bin (specific dog poo bin)	No	NA	NA	NA	NA	NA	NA	NA	NA	NA	NA	NA	NA
2020/06/22 4:06:28 PM GMT+1	Dog	Small (4-10kg)	10	3	Yes	To prevent fleas (or other pests)	No	NA	Bravecto tablet	Bravecto tablet	4	From a veterinary practice	NA	NA	NA	NA	No	No	NA	No	NA	12	In their own bed	In their own bed	Every month	Every day	Every 3 months	In a bath, sink or shower	Never	2 hours	3 hours	Mainly on unpaved surfaces like field margins, forest tracks or the beach	Yes, I will walk my dog in light drizzle	7	Bag and bin (specific dog poo bin);Bag and bin (home council bin)	Bag and bin (home council bin)	No	NA	NA	NA	NA	NA	NA	NA	NA	NA	NA	NA	NA
2020/06/22 4:07:47 PM GMT+1	Dog	Small (4-10kg)	10	10	Yes	In response to a flea infestation	No	NA	Frontline or Frontline Combo spot on	Frontline or Frontline Combo spot on	12	From a petshop	Yes	Yes	Yes	NA	Yes	Yes	January;February;March;April;May;June;July;August;September;October;November;December	No	NA	2	In their own bed;On the furniture	In their own bed	Every week or more	Every day	Every 6 months	In a bath, sink or shower	Never	30 minutes	2 hours	Mainly on paved surfaces	Yes, I will walk my dog in light drizzle	9	Bag and bin (specific dog poo bin);Bag and bin (home council bin)	Bag and bin (home council bin)	No	NA	NA	NA	NA	NA	NA	NA	NA	NA	NA	NA	NA
2020/06/22 4:08:03 PM GMT+1	Dog	Large (20-40kg)	23	4	Yes	To prevent fleas (or other pests)	No	NA	Advocate	Advocate	12	From a veterinary practice	Yes	No	NA	NA	No	No	NA	No	NA	4	In their own bed;On the furniture;On the floor	In their own bed	Every 2 weeks	Every day	Every 3 months	Outdoors	Never	1 hour	3 hours	Mainly on paved surfaces	Occasionally, but I try to avoid this	10	Bag and bin (specific dog poo bin);Bag and bin (home council bin)	Bag and bin (specific dog poo bin)	No	NA	NA	NA	NA	NA	NA	NA	NA	NA	NA	NA	NA
2020/06/22 4:09:26 PM GMT+1	Dog	Medium (10-20 kg)	19	17	Don't know	NA	NA	NA	NA	NA	NA	NA	NA	NA	NA	NA	No	No	NA	No	NA	1	In their own bed;On the furniture;On a family member's bed;On the floor	On the furniture	Every 2 weeks	Every day	Every month	In a bath, sink or shower	Never	30 minutes	3 hours	Mainly on unpaved surfaces like field margins, forest tracks or the beach	Yes, I will walk my dog in light drizzle	10	Bag and bin (specific dog poo bin);Bag and bin (home council bin)	Bag and bin (home council bin)	No	NA	NA	NA	NA	NA	NA	NA	NA	NA	NA	NA	NA
2020/06/22 4:09:40 PM GMT+1	Dog	Large (20-40kg)	35	4	Yes	To prevent fleas (or other pests)	No	NA	Frontline or Frontline Combo spot on	Frontline or Frontline Combo spot on	6	From a supermarket	Yes	Yes	Yes	NA	No	No	NA	Yes	May	6	On a family member's bed	On a family member's bed	Every 3 months	Never	Every week or more	Outdoors	Every week or more	2 hours	2 hours	An equal mixture of the above	Yes, I walk my dog even if it is raining heavily and my dog gets completely wet	10	Bag and bin (specific dog poo bin);Bag and bin (home council bin)	Bag and bin (specific dog poo bin)	No	NA	NA	NA	NA	NA	NA	NA	NA	NA	NA	NA	NA
2020/06/22 4:09:47 PM GMT+1	Cat	NA	NA	NA	NA	NA	NA	NA	NA	NA	NA	NA	NA	NA	NA	NA	NA	NA	NA	NA	NA	NA	NA	NA	NA	NA	NA	NA	NA	NA	NA	NA	NA	NA	NA	NA	NA	Large (above 4 kg)	4.6	12	Yes	To prevent fleas (or other pests)	No	NA	Advantage	Advantage	3	Online	Yes
2020/06/22 4:09:52 PM GMT+1	Dog	Medium (10-20 kg)	15	1	Yes	In response to a flea infestation	No	NA	Frontline or Frontline Combo spot on	Frontline or Frontline Combo spot on	1	From a petshop	Yes	No	NA	NA	Yes	Yes	Don't know	Yes	May	1	In their own bed;On the furniture;On the floor	In their own bed	Every month	Every day	Every 3 months	In a bath, sink or shower	Every week or more	1 hour	3 hours	Mainly on unpaved surfaces like field margins, forest tracks or the beach	Yes, I walk my dog even if it is raining heavily and my dog gets completely wet	7	Bag and bin (specific dog poo bin);Bag and bin (home council bin)	Bag and bin (home council bin)	No	NA	NA	NA	NA	NA	NA	NA	NA	NA	NA	NA	NA
2020/06/22 4:10:41 PM GMT+1	Dog	Large (20-40kg)	25	5	No	NA	NA	NA	NA	NA	NA	NA	NA	NA	NA	NA	No	No	NA	No	NA	None	In their own bed;On the furniture	On the furniture	Every month	Every day	Every 3 months	At the groomers	Never	2 hours	6 hours	Mainly on unpaved surfaces like field margins, forest tracks or the beach	Yes, I walk my dog even if it is raining heavily and my dog gets completely wet	10	Bag and bin (specific dog poo bin)	Bag and bin (specific dog poo bin)	No	NA	NA	NA	NA	NA	NA	NA	NA	NA	NA	NA	NA
2020/06/22 4:11:55 PM GMT+1	Dog	Small (4-10kg)	7.06	4	Yes	To prevent fleas (or other pests)	No	NA	Advocate	Advocate	12	From a veterinary practice	No	Yes	Yes	NA	No	No	NA	No	NA	2	In a crate	In their own bed	Every 3 months	Every day	Every 3 months	At the groomers	Never	1 hour	2 hours	An equal mixture of the above	Occasionally, but I try to avoid this	10	Bag and bin (specific dog poo bin);Bag and bin (home council bin)	Bag and bin (home council bin)	No	NA	NA	NA	NA	NA	NA	NA	NA	NA	NA	NA	NA
2020/06/22 4:12:29 PM GMT+1	Cat	NA	NA	NA	NA	NA	NA	NA	NA	NA	NA	NA	NA	NA	NA	NA	NA	NA	NA	NA	NA	NA	NA	NA	NA	NA	NA	NA	NA	NA	NA	NA	NA	NA	NA	NA	NA	Large (above 4 kg)	4.6	11	Yes	To prevent fleas (or other pests)	No	NA	Comfortis	Comfortis	8	From a veterinary practice	NA
2020/06/22 4:12:47 PM GMT+1	Cat	NA	NA	NA	NA	NA	NA	NA	NA	NA	NA	NA	NA	NA	NA	NA	NA	NA	NA	NA	NA	NA	NA	NA	NA	NA	NA	NA	NA	NA	NA	NA	NA	NA	NA	NA	NA	Large (above 4 kg)	4.5	10	Yes	To prevent fleas (or other pests)	No	NA	Advocate	Advocate	12	From a veterinary practice	No
2020/06/22 4:12:56 PM GMT+1	Dog	Small (4-10kg)	8	2	Yes	To prevent fleas (or other pests)	Yes	NA	Advocate	Advocate	12	From a veterinary practice	No	Yes	Yes	NA	No	No	NA	No	NA	2	In their own bed;On the furniture;On a family member's bed;On the floor	On the furniture	Every 2 weeks	Every day	Every month	In a bath, sink or shower	Every month	1 hour	2 hours	Mainly on unpaved surfaces like field margins, forest tracks or the beach	Yes, I walk my dog even if it is raining heavily and my dog gets completely wet	9	Bag and bin (specific dog poo bin);Bag and bin (home council bin);Straight in a bin (of any kind)	Bag and bin (home council bin)	No	NA	NA	NA	NA	NA	NA	NA	NA	NA	NA	NA	NA
2020/06/22 4:13:26 PM GMT+1	Dog	Small (4-10kg)	9	7	Yes	To prevent fleas (or other pests)	No	NA	Bob Martin Clear /Clear Plus (Fipronil);Effipro Spot On;Frontline or Frontline Combo spot on	Frontline or Frontline Combo spot on	4	Online	No	Yes	Yes	NA	No	No	NA	Yes	March;April;May	2	In their own bed;On a family member's bed	On a family member's bed	Once a year	Every day	Every 3 months	In a bath, sink or shower	Every month	1 hour	2 hours	Mainly on unpaved surfaces like field margins, forest tracks or the beach	Yes, I will walk my dog in light drizzle	10	Bag and bin (specific dog poo bin);Bag and bin (home council bin)	Bag and bin (specific dog poo bin)	No	NA	NA	NA	NA	NA	NA	NA	NA	NA	NA	NA	NA
2020/06/22 4:16:11 PM GMT+1	Dog	Large (20-40kg)	NA	5	Yes	To prevent fleas (or other pests)	No	NA	Advantage	Advantage	2	From a veterinary practice	NA	Yes	Yes	NA	No	No	NA	No	NA	3	On the furniture;On the floor	On the furniture	Every 3 months	Every week	Every 2 weeks	In a bath, sink or shower	Every 2 weeks	1 hour	3 hours	Mainly on unpaved surfaces like field margins, forest tracks or the beach	Yes, I will walk my dog in light drizzle	10	Bag and bin (specific dog poo bin)	Bag and bin (specific dog poo bin)	No	NA	NA	NA	NA	NA	NA	NA	NA	NA	NA	NA	NA
2020/06/22 4:17:35 PM GMT+1	Cat	NA	NA	NA	NA	NA	NA	NA	NA	NA	NA	NA	NA	NA	NA	NA	NA	NA	NA	NA	NA	NA	NA	NA	NA	NA	NA	NA	NA	NA	NA	NA	NA	NA	NA	NA	NA	Small (below 4kg)	3.2	17	Yes	In response to a flea infestation	No	NA	Frontline or Frontline Combo	Frontline or Frontline Combo	3	From a veterinary practice	Yes
2020/06/22 4:20:07 PM GMT+1	Dog	Large (20-40kg)	30	11	Yes	To prevent fleas (or other pests)	No	NA	NexGard	NexGard Spectra	4	From a veterinary practice	NA	NA	NA	NA	No	No	NA	No	NA	None	In their own bed;On the furniture;On the floor	In their own bed	Every month	Every day	Every week or more	Outdoors	Every week or more	1 hour	3 hours	Mainly on unpaved surfaces like field margins, forest tracks or the beach	Yes, I will walk my dog in light drizzle	10	Bag and bin (specific dog poo bin);Bag and bin (home council bin)	Bag and bin (home council bin)	No	NA	NA	NA	NA	NA	NA	NA	NA	NA	NA	NA	NA
2020/06/22 4:20:55 PM GMT+1	Dog	Miniature (< 4 kg)	3.2	1	Yes	To prevent fleas (or other pests)	No	NA	NexGard	NexGard	1	From a petshop	Don't know	Yes	Yes	NA	No	No	NA	No	NA	2	On a family member's bed	On a family member's bed	Every week or more	Never	Every 2 weeks	In a bath, sink or shower	Never	30 minutes	1 hour	An equal mixture of the above	Yes, I will walk my dog in light drizzle	2	Bag and bin (specific dog poo bin)	Bag and bin (specific dog poo bin)	No	NA	NA	NA	NA	NA	NA	NA	NA	NA	NA	NA	NA
2020/06/22 4:22:16 PM GMT+1	Dog	Extra large (over 40 kg)	63	3	No	NA	NA	NA	NA	NA	NA	NA	NA	NA	NA	NA	No	No	NA	Yes	May;June;July	None	Outdoors kennel/building	Outdoors kennel/building	Every month	Every day	Every month	In a bath, sink or shower	Less than once a year	1 hour	12 hours	Mainly on unpaved surfaces like field margins, forest tracks or the beach	Yes, I walk my dog even if it is raining heavily and my dog gets completely wet	10	Bag and bin (specific dog poo bin);Bag and bin (home council bin)	Bag and bin (home council bin)	No	NA	NA	NA	NA	NA	NA	NA	NA	NA	NA	NA	NA
2020/06/22 4:22:48 PM GMT+1	Dog	Medium (10-20 kg)	15	8	Yes	To prevent fleas (or other pests)	No	NA	Frontline or Frontline Combo spot on	Frontline or Frontline Combo spot on	12	From a veterinary practice	No	Yes	Yes	NA	No	No	NA	No	NA	12	In their own bed	In their own bed	Every month	Every day	Every 3 months	At the groomers	Every 2 weeks	1 hour	6 hours	Mainly on unpaved surfaces like field margins, forest tracks or the beach	Yes, I will walk my dog in light drizzle	10	Bag and bin (specific dog poo bin)	Bag and bin (specific dog poo bin)	No	NA	NA	NA	NA	NA	NA	NA	NA	NA	NA	NA	NA
2020/06/22 4:23:05 PM GMT+1	Dog	Large (20-40kg)	32	11	Yes	To prevent fleas (or other pests)	No	NA	Endectrid	Frontline or Frontline Combo spot on	4	From a veterinary practice	Yes	No	NA	NA	No	No	NA	Yes	August	2	In their own bed	In their own bed	Every 2 weeks	Every day	Every 2 weeks	Outdoors	Every week or more	1 hour	2 hours	Mainly on unpaved surfaces like field margins, forest tracks or the beach	Yes, I walk my dog even if it is raining heavily and my dog gets completely wet	10	Bag and bin (specific dog poo bin)	Bag and bin (specific dog poo bin)	No	NA	NA	NA	NA	NA	NA	NA	NA	NA	NA	NA	NA
2020/06/22 4:24:23 PM GMT+1	Cat	NA	NA	NA	NA	NA	NA	NA	NA	NA	NA	NA	NA	NA	NA	NA	NA	NA	NA	NA	NA	NA	NA	NA	NA	NA	NA	NA	NA	NA	NA	NA	NA	NA	NA	NA	NA	Large (above 4 kg)	NA	3	Yes	In response to a flea infestation	Don't know	NA	Frontline or Frontline Combo	Advantage	1	From a petshop	No
2020/06/22 4:26:01 PM GMT+1	Cat	NA	NA	NA	NA	NA	NA	NA	NA	NA	NA	NA	NA	NA	NA	NA	NA	NA	NA	NA	NA	NA	NA	NA	NA	NA	NA	NA	NA	NA	NA	NA	NA	NA	NA	NA	NA	Small (below 4kg)	4	14	Yes	To prevent fleas (or other pests)	No	NA	Program injection	Program injection	1	From a veterinary practice	NA
2020/06/22 4:26:07 PM GMT+1	Dog	Medium (10-20 kg)	18	4	No	NA	NA	NA	NA	NA	NA	NA	NA	NA	NA	NA	No	No	NA	No	NA	None	On a family member's bed	On a family member's bed	Every week or more	Every day	Every month	In a bath, sink or shower	Every 6 months	1 hour	3 hours	An equal mixture of the above	Yes, I will walk my dog in light drizzle	10	Bag and bin (home council bin)	Bag and bin (home council bin)	No	NA	NA	NA	NA	NA	NA	NA	NA	NA	NA	NA	NA
2020/06/22 4:27:01 PM GMT+1	Dog	Medium (10-20 kg)	23	6	Yes	To prevent fleas (or other pests)	No	NA	Frontline or Frontline Combo spot on	Frontline or Frontline Combo spot on	3	From a petshop	No	Yes	Yes	NA	Yes	No	NA	No	NA	None	In their own bed;On the floor	In their own bed	Every 3 months	Every day	Every 3 months	At the groomers	Never	1 hour	3 hours	An equal mixture of the above	Occasionally, but I try to avoid this	10	Bag and bin (specific dog poo bin);Bag and bin (home council bin)	Bag and bin (home council bin)	No	NA	NA	NA	NA	NA	NA	NA	NA	NA	NA	NA	NA
2020/06/22 4:29:47 PM GMT+1	Cat	NA	NA	NA	NA	NA	NA	NA	NA	NA	NA	NA	NA	NA	NA	NA	NA	NA	NA	NA	NA	NA	NA	NA	NA	NA	NA	NA	NA	NA	NA	NA	NA	NA	NA	NA	NA	Large (above 4 kg)	4.5	3	Yes	To prevent fleas (or other pests)	No	NA	Advocate	Advocate	5	From a veterinary practice	Yes
2020/06/22 4:31:55 PM GMT+1	Dog	Medium (10-20 kg)	12	1	Yes	To prevent fleas (or other pests)	No	NA	Bravecto tablet	Bravecto tablet	6	From a veterinary practice	NA	NA	NA	NA	No	No	NA	No	NA	4	In their own bed;On the furniture;On the floor	On the floor	Every 2 weeks	Every day	Every month	In a bath, sink or shower	Every 2 weeks	1 hour	3 hours	Mainly on unpaved surfaces like field margins, forest tracks or the beach	Yes, I will walk my dog in light drizzle	10	Bag and bin (specific dog poo bin);Bag and bin (home council bin)	Bag and bin (home council bin)	No	NA	NA	NA	NA	NA	NA	NA	NA	NA	NA	NA	NA
2020/06/22 4:36:20 PM GMT+1	Dog	Small (4-10kg)	6	2	Yes	To prevent fleas (or other pests)	No	NA	Advocate;Effipro Spot On	Effipro Spot On	12	From a veterinary practice	Yes	Yes	Yes	NA	No	No	NA	No	NA	4	On a family member's bed	On the furniture	Every month	Every day	Every 2 weeks	In a bath, sink or shower	Every 3 months	1 hour	3 hours	An equal mixture of the above	Yes, I will walk my dog in light drizzle	10	Bag and bin (specific dog poo bin);Bag and bin (home council bin)	Bag and bin (home council bin)	No	NA	NA	NA	NA	NA	NA	NA	NA	NA	NA	NA	NA
2020/06/22 4:37:22 PM GMT+1	Dog	Medium (10-20 kg)	15	1	Yes	To prevent fleas (or other pests)	No	NA	Advantage;Endectrid	Endectrid	4	From a veterinary practice	Yes	Yes	Yes	NA	No	No	NA	No	NA	12	In a crate	In a crate	Every 3 months	Every day	Every 3 months	In a bath, sink or shower	Every 3 months	1 hour	3 hours	An equal mixture of the above	Occasionally, but I try to avoid this	10	Bag and bin (specific dog poo bin);Bag and bin (home council bin);Straight in a bin (of any kind)	Bag and bin (home council bin)	No	NA	NA	NA	NA	NA	NA	NA	NA	NA	NA	NA	NA
2020/06/22 4:38:11 PM GMT+1	Cat	NA	NA	NA	NA	NA	NA	NA	NA	NA	NA	NA	NA	NA	NA	NA	NA	NA	NA	NA	NA	NA	NA	NA	NA	NA	NA	NA	NA	NA	NA	NA	NA	NA	NA	NA	NA	Small (below 4kg)	3.8	4	Yes	To prevent fleas (or other pests)	No	NA	Bravecto	Bravecto	4	From a veterinary practice	Yes
2020/06/22 4:38:28 PM GMT+1	Dog	Large (20-40kg)	20	4	Yes	In response to a flea infestation	No	NA	Frontline or Frontline Combo spot on	Frontline or Frontline Combo spot on	1	From a petshop	Yes	Yes	Yes	NA	Yes	Yes	March;April;May;June;July	Yes	April;May;June;July;August	None	In their own bed;On the furniture;On the floor	On the furniture	Every month	Every day	Every month	In a bath, sink or shower	Every week or more	2 hours	3 hours	Mainly on unpaved surfaces like field margins, forest tracks or the beach	Yes, I walk my dog even if it is raining heavily and my dog gets completely wet	10	Bag and bin (specific dog poo bin);Bag and bin (home council bin);Straight in a bin (of any kind)	Bag and bin (specific dog poo bin)	No	NA	NA	NA	NA	NA	NA	NA	NA	NA	NA	NA	NA
2020/06/22 4:39:04 PM GMT+1	Cat	NA	NA	NA	NA	NA	NA	NA	NA	NA	NA	NA	NA	NA	NA	NA	NA	NA	NA	NA	NA	NA	NA	NA	NA	NA	NA	NA	NA	NA	NA	NA	NA	NA	NA	NA	NA	Small (below 4kg)	3.5	11	Yes	To prevent fleas (or other pests)	No	NA	Frontline or Frontline Combo	Frontline or Frontline Combo	3	From a veterinary practice	Yes
2020/06/22 4:39:52 PM GMT+1	Dog	Large (20-40kg)	34	2	Yes	To prevent fleas (or other pests)	No	NA	Advocate	Advocate	Don't know	From a veterinary practice	Yes	No	NA	NA	No	No	NA	No	NA	Don't know	In a crate	In a crate	Every week or more	Every day	Every 3 months	In a bath, sink or shower	Every 6 months	Don't know	1 hour	An equal mixture of the above	Occasionally, but I try to avoid this	10	Bag and bin (home council bin)	Bag and bin (home council bin)	No	NA	NA	NA	NA	NA	NA	NA	NA	NA	NA	NA	NA
2020/06/22 4:41:49 PM GMT+1	Dog	Medium (10-20 kg)	15	5	Yes	To prevent fleas (or other pests)	No	NA	Bravecto tablet	Bravecto tablet	3	From a veterinary practice	NA	NA	NA	NA	No	No	NA	No	NA	4	In their own bed;Outdoors kennel/building;In a crate	Outdoors kennel/building	Once a year	Every day	Once a year	Outdoors	Less than once a year	1 hour	Over 12 hours	Mainly on unpaved surfaces like field margins, forest tracks or the beach	Yes, I walk my dog even if it is raining heavily and my dog gets completely wet	9	Bag and bin (specific dog poo bin);Bag and bin (home council bin);Bury in the ground	Bag and bin (specific dog poo bin)	Yes	NA	NA	NA	NA	NA	NA	NA	NA	NA	NA	NA	NA
2020/06/22 4:42:27 PM GMT+1	Dog	Small (4-10kg)	10	2	Yes	To prevent fleas (or other pests)	No	NA	Frontline generic	Frontline generic	12	Online	Yes	No	NA	NA	No	No	NA	No	NA	3	In their own bed;On the furniture;On a family member's bed	On the furniture	Never	Every day	Every 2 weeks	In a bath, sink or shower	Every 6 months	1 hour	1 hour	An equal mixture of the above	Yes, I will walk my dog in light drizzle	10	Bag and bin (specific dog poo bin)	Bag and bin (specific dog poo bin)	No	NA	NA	NA	NA	NA	NA	NA	NA	NA	NA	NA	NA
2020/06/22 4:43:52 PM GMT+1	Dog	Medium (10-20 kg)	12	2	Yes	To prevent fleas (or other pests)	No	NA	Credelio	Credelio	12	From a veterinary practice	NA	NA	NA	NA	No	No	NA	No	NA	12	In their own bed;On the furniture;On a family member's bed;On the floor;In a crate	In their own bed	Every month	Every day	Every 2 weeks	In a bath, sink or shower	Every 3 months	2 hours	6 hours	An equal mixture of the above	Yes, I will walk my dog in light drizzle	8	Bag and bin (specific dog poo bin);Bag and bin (home council bin);Straight in a bin (of any kind)	Bag and bin (home council bin)	No	NA	NA	NA	NA	NA	NA	NA	NA	NA	NA	NA	NA
2020/06/22 4:46:53 PM GMT+1	Cat	NA	NA	NA	NA	NA	NA	NA	NA	NA	NA	NA	NA	NA	NA	NA	NA	NA	NA	NA	NA	NA	NA	NA	NA	NA	NA	NA	NA	NA	NA	NA	NA	NA	NA	NA	NA	Large (above 4 kg)	4.8	6	Yes	To prevent fleas (or other pests)	No	NA	Advocate	Advocate	3	From a veterinary practice	Yes
2020/06/22 4:48:57 PM GMT+1	Dog	Large (20-40kg)	25	2	Yes	To prevent fleas (or other pests)	No	NA	Bravecto tablet;Bravecto spot on	Bravecto tablet	3	From a veterinary practice	No	Yes	Yes	NA	No	No	NA	No	NA	2	In a crate	In a crate	Every week or more	Every day	Every 6 months	In a bath, sink or shower	Every month	1 hour	3 hours	An equal mixture of the above	Yes, I walk my dog even if it is raining heavily and my dog gets completely wet	10	Bag and bin (home council bin)	Bag and bin (home council bin)	Yes	NA	NA	NA	NA	NA	NA	NA	NA	NA	NA	NA	NA
2020/06/22 4:50:54 PM GMT+1	Dog	Large (20-40kg)	29	5	No	NA	NA	NA	NA	NA	NA	NA	NA	NA	NA	NA	No	No	NA	Yes	February;March;April;May;June;July;August;September;October;November	None	In their own bed	In their own bed	Every month	Every day	Never	NA	Every month	2 hours	6 hours	Mainly on unpaved surfaces like field margins, forest tracks or the beach	Yes, I walk my dog even if it is raining heavily and my dog gets completely wet	8	Flush down the toilet	Flush down the toilet	Yes	NA	NA	NA	NA	NA	NA	NA	NA	NA	NA	NA	NA
2020/06/22 4:52:03 PM GMT+1	Cat	NA	NA	NA	NA	NA	NA	NA	NA	NA	NA	NA	NA	NA	NA	NA	NA	NA	NA	NA	NA	NA	NA	NA	NA	NA	NA	NA	NA	NA	NA	NA	NA	NA	NA	NA	NA	Large (above 4 kg)	NA	6	Yes	In response to a flea infestation	Yes	Johnsons 4 fleas tablets	Advocate	Johnsons	3	From a veterinary practice	Yes
2020/06/22 4:52:41 PM GMT+1	Dog	Large (20-40kg)	27	5	No	NA	NA	NA	NA	NA	NA	NA	NA	NA	NA	NA	Yes	Yes	May	No	NA	12	On the furniture;On the floor	On the furniture	Never	Every day	Every 3 months	At the groomers	Never	30 minutes	3 hours	An equal mixture of the above	Yes, I walk my dog even if it is raining heavily and my dog gets completely wet	10	Bag and bin (home council bin)	Bag and bin (home council bin)	No	NA	NA	NA	NA	NA	NA	NA	NA	NA	NA	NA	NA
2020/06/22 4:52:46 PM GMT+1	Cat	NA	NA	NA	NA	NA	NA	NA	NA	NA	NA	NA	NA	NA	NA	NA	NA	NA	NA	NA	NA	NA	NA	NA	NA	NA	NA	NA	NA	NA	NA	NA	NA	NA	NA	NA	NA	Large (above 4 kg)	4	5	No	NA	NA	NA	NA	NA	NA	NA	NA
2020/06/22 4:52:49 PM GMT+1	Dog	Medium (10-20 kg)	11	3	No	NA	NA	NA	NA	NA	NA	NA	NA	NA	NA	NA	No	No	NA	No	NA	None	In their own bed;On the furniture;On a family member's bed;On the floor	On a family member's bed	Every 2 weeks	Every day	Every month	In a bath, sink or shower	Every week or more	2 hours	3 hours	Mainly on unpaved surfaces like field margins, forest tracks or the beach	Yes, I walk my dog even if it is raining heavily and my dog gets completely wet	10	Bag and bin (specific dog poo bin)	Bag and bin (specific dog poo bin)	No	NA	NA	NA	NA	NA	NA	NA	NA	NA	NA	NA	NA
2020/06/22 4:53:57 PM GMT+1	Dog	Large (20-40kg)	21	13	Yes	In response to a flea infestation	No	NA	Stronghold	Stronghold	1	Online	Yes	Yes	Yes	NA	Yes	Yes	March	Yes	May;June	None	In their own bed;On the furniture;On a family member's bed;On the floor	On the floor	Every 3 months	Every day	Every 3 months	In a bath, sink or shower	Every week or more	1 hour	3 hours	Mainly on unpaved surfaces like field margins, forest tracks or the beach	Yes, I walk my dog even if it is raining heavily and my dog gets completely wet	10	Bag and bin (specific dog poo bin);Bag and bin (home council bin)	Bag and bin (specific dog poo bin)	No	NA	NA	NA	NA	NA	NA	NA	NA	NA	NA	NA	NA
2020/06/22 4:55:40 PM GMT+1	Dog	Small (4-10kg)	9.3	7	Yes	To prevent fleas (or other pests)	No	NA	NexGard Spectra	NexGard Spectra	12	From a veterinary practice	NA	NA	NA	NA	No	No	NA	No	NA	Don't know	In their own bed;On the furniture;On a family member's bed;On the floor	On the furniture	Every month	Every day	Every week or more	In a bath, sink or shower	Never	1 hour	1 hour	An equal mixture of the above	Yes, I walk my dog even if it is raining heavily and my dog gets completely wet	10	Bag and bin (specific dog poo bin);Bag and bin (home council bin);Straight in a bin (of any kind)	Bag and bin (specific dog poo bin)	No	NA	NA	NA	NA	NA	NA	NA	NA	NA	NA	NA	NA
2020/06/22 4:55:42 PM GMT+1	Cat	NA	NA	NA	NA	NA	NA	NA	NA	NA	NA	NA	NA	NA	NA	NA	NA	NA	NA	NA	NA	NA	NA	NA	NA	NA	NA	NA	NA	NA	NA	NA	NA	NA	NA	NA	NA	Large (above 4 kg)	4.6	7	Yes	To prevent fleas (or other pests)	No	NA	Advantage	Advantage	3	From a veterinary practice	Yes
2020/06/22 4:57:32 PM GMT+1	Dog	Medium (10-20 kg)	17	2	Yes	To prevent fleas (or other pests)	No	NA	Easecto	Easecto	10	From a veterinary practice	NA	NA	NA	NA	No	No	NA	No	NA	11	In their own bed;On the furniture;On a family member's bed	In their own bed	Every 3 months	Every day	Every 2 weeks	In a bath, sink or shower	Every week or more	2 hours	3 hours	An equal mixture of the above	Yes, I walk my dog even if it is raining heavily and my dog gets completely wet	9	Bag and bin (specific dog poo bin);Bag and bin (home council bin)	Bag and bin (specific dog poo bin)	No	NA	NA	NA	NA	NA	NA	NA	NA	NA	NA	NA	NA
2020/06/22 4:58:54 PM GMT+1	Cat	NA	NA	NA	NA	NA	NA	NA	NA	NA	NA	NA	NA	NA	NA	NA	NA	NA	NA	NA	NA	NA	NA	NA	NA	NA	NA	NA	NA	NA	NA	NA	NA	NA	NA	NA	NA	Small (below 4kg)	NA	4	Yes	In response to a flea infestation	No	NA	Frontline or Frontline Combo;Stronghold	Stronghold	5	From a veterinary practice	No
2020/06/22 4:59:08 PM GMT+1	Cat	NA	NA	NA	NA	NA	NA	NA	NA	NA	NA	NA	NA	NA	NA	NA	NA	NA	NA	NA	NA	NA	NA	NA	NA	NA	NA	NA	NA	NA	NA	NA	NA	NA	NA	NA	NA	Large (above 4 kg)	5	7	Yes	In response to a flea infestation	No	NA	Advantage	Advantage	3	Online	No
2020/06/22 4:59:31 PM GMT+1	Dog	Medium (10-20 kg)	18	3	Yes	To prevent fleas (or other pests)	No	NA	Frontline or Frontline Combo spot on	Frontline or Frontline Combo spot on	6	From a petshop	No	Yes	Yes	NA	No	No	NA	No	NA	3	In their own bed;On the furniture;On the floor	In their own bed	Every 2 weeks	Every day	Every 3 months	At the groomers	Never	1 hour	1 hour	Mainly on unpaved surfaces like field margins, forest tracks or the beach	Yes, I walk my dog even if it is raining heavily and my dog gets completely wet	10	Bag and bin (specific dog poo bin)	Bag and bin (specific dog poo bin)	No	NA	NA	NA	NA	NA	NA	NA	NA	NA	NA	NA	NA
2020/06/22 4:59:49 PM GMT+1	Dog	Medium (10-20 kg)	19	3	Yes	To prevent fleas (or other pests)	No	NA	NexGard Spectra;Seresto collar	Seresto collar	6	Online	Yes	Yes	Yes	NA	No	No	NA	Yes	September	10	On a family member's bed	On a family member's bed	Less than once a year	Every day	Every 2 weeks	In a bath, sink or shower	Every 2 weeks	1 hour	3 hours	Mainly on unpaved surfaces like field margins, forest tracks or the beach	Yes, I walk my dog even if it is raining heavily and my dog gets completely wet	10	Bag and bin (specific dog poo bin);Bag and bin (home council bin)	Bag and bin (home council bin)	No	NA	NA	NA	NA	NA	NA	NA	NA	NA	NA	NA	NA
2020/06/22 5:01:29 PM GMT+1	Cat	NA	NA	NA	NA	NA	NA	NA	NA	NA	NA	NA	NA	NA	NA	NA	NA	NA	NA	NA	NA	NA	NA	NA	NA	NA	NA	NA	NA	NA	NA	NA	NA	NA	NA	NA	NA	Large (above 4 kg)	5	11	Yes	To prevent fleas (or other pests)	No	NA	Don't know	Don't know	4	From a veterinary practice	Yes
2020/06/22 5:02:07 PM GMT+1	Dog	Small (4-10kg)	8	13	Yes	To prevent fleas (or other pests)	Yes	NA	Advocate	Advocate	12	From a veterinary practice	Yes	NA	NA	NA	Yes	Yes	Don't know	No	NA	4	In their own bed;On the furniture;On the floor;In a crate	In their own bed	Every week or more	Every day	Every month	In a bath, sink or shower	Every 6 months	1 hour	1 hour	An equal mixture of the above	Yes, I will walk my dog in light drizzle	10	Bag and bin (specific dog poo bin);Flush down the toilet	Bag and bin (specific dog poo bin)	No	NA	NA	NA	NA	NA	NA	NA	NA	NA	NA	NA	NA
2020/06/22 5:02:19 PM GMT+1	Dog	Medium (10-20 kg)	10	1	Yes	To prevent fleas (or other pests)	No	NA	Advocate	Advocate	6	From a veterinary practice	Yes	Yes	Yes	NA	No	No	NA	Yes	August	6	In their own bed	In their own bed	Every month	Every day	Every 2 weeks	In a bath, sink or shower	Once a year	2 hours	2 hours	Mainly on unpaved surfaces like field margins, forest tracks or the beach	Yes, I will walk my dog in light drizzle	10	Bag and bin (specific dog poo bin);Bag and bin (home council bin)	Bag and bin (specific dog poo bin)	No	NA	NA	NA	NA	NA	NA	NA	NA	NA	NA	NA	NA
2020/06/22 5:03:49 PM GMT+1	Dog	Small (4-10kg)	4.5	6	No	NA	NA	NA	NA	NA	NA	NA	NA	NA	NA	NA	No	No	NA	No	NA	1	In their own bed;On the furniture;On the floor;In a crate	On the furniture	Every week or more	Every day	Every 2 weeks	At the groomers	Never	1 hour	2 hours	Mainly on unpaved surfaces like field margins, forest tracks or the beach	Yes, I walk my dog even if it is raining heavily and my dog gets completely wet	10	Bag and bin (specific dog poo bin);Bag and bin (home council bin)	Bag and bin (specific dog poo bin)	Yes	NA	NA	NA	NA	NA	NA	NA	NA	NA	NA	NA	NA
2020/06/22 5:04:30 PM GMT+1	Dog	Medium (10-20 kg)	20	4	Yes	To prevent fleas (or other pests)	No	NA	Bravecto tablet	Bravecto tablet	4	From a veterinary practice	NA	NA	NA	NA	No	No	NA	Yes	June;July	12	On a family member's bed	On a family member's bed	Every 2 weeks	Every day	Every month	In a bath, sink or shower	Every month	1 hour	2 hours	Mainly on unpaved surfaces like field margins, forest tracks or the beach	Yes, I will walk my dog in light drizzle	10	Bag and bin (specific dog poo bin);Bag and bin (home council bin)	Bag and bin (specific dog poo bin)	No	NA	NA	NA	NA	NA	NA	NA	NA	NA	NA	NA	NA
2020/06/22 5:05:35 PM GMT+1	Dog	Large (20-40kg)	32	8	Yes	To prevent fleas (or other pests)	No	NA	NexGard Spectra	NexGard Spectra	4	From a veterinary practice	NA	NA	NA	NA	No	No	NA	No	NA	3	On a family member's bed	On a family member's bed	Every week or more	Every day	Every month	In a bath, sink or shower	Every week or more	1 hour	2 hours	Mainly on unpaved surfaces like field margins, forest tracks or the beach	Yes, I walk my dog even if it is raining heavily and my dog gets completely wet	10	Bag and bin (specific dog poo bin)	Bag and bin (specific dog poo bin)	No	NA	NA	NA	NA	NA	NA	NA	NA	NA	NA	NA	NA
2020/06/22 5:06:12 PM GMT+1	Dog	Miniature (< 4 kg)	NA	2	No	NA	NA	NA	NA	NA	NA	NA	NA	NA	NA	NA	No	No	NA	No	NA	None	In their own bed;On the furniture	On the furniture	Every week or more	Every day	Once a year	In a bath, sink or shower	Never	1 hour	3 hours	Mainly on paved surfaces	Occasionally, but I try to avoid this	10	None of the above/don't know	None of the above/don't know	No	NA	NA	NA	NA	NA	NA	NA	NA	NA	NA	NA	NA
2020/06/22 5:06:14 PM GMT+1	Dog	Large (20-40kg)	30	2	Yes	In response to a flea infestation	Yes	Billy no mates	Advocate;Seresto collar	Seresto collar	4	Online	Yes	Yes	Yes	NA	Yes	Yes	January;February;March;April;May;September;October;November;December;Don't know	No	NA	3	In their own bed;On a family member's bed;On the floor;In a crate	In a crate	Every week or more	Every day	Every month	In a bath, sink or shower	Every 3 months	30 minutes	1 hour	An equal mixture of the above	Occasionally, but I try to avoid this	10	Bag and bin (specific dog poo bin)	Bag and bin (specific dog poo bin)	Yes	NA	NA	NA	NA	NA	NA	NA	NA	NA	NA	NA	NA
2020/06/22 5:07:01 PM GMT+1	Dog	Small (4-10kg)	7	11	Yes	In response to a flea infestation	No	NA	Frontline or Frontline Combo spot on	Frontline or Frontline Combo spot on	3	Other type of shop - pharmacy/agricultural/equestrian/other	Yes	Yes	Yes	NA	Yes	Yes	August;September;October	No	NA	1	In their own bed;On the furniture;On the floor;In a crate	In their own bed	Every 2 weeks	Every day	Once a year	In a bath, sink or shower	Never	My dog doesn't go for walks	3 hours	NA	NA	10	Bag and bin (specific dog poo bin);Bag and bin (home council bin)	Bag and bin (home council bin)	No	NA	NA	NA	NA	NA	NA	NA	NA	NA	NA	NA	NA
2020/06/22 5:07:15 PM GMT+1	Dog	Large (20-40kg)	25	7	No	NA	NA	NA	NA	NA	NA	NA	NA	NA	NA	NA	No	No	NA	Yes	April;May	1	In their own bed	In their own bed	Every week or more	Every day	Every month	In a bath, sink or shower	Every week or more	1 hour	3 hours	Mainly on unpaved surfaces like field margins, forest tracks or the beach	Yes, I will walk my dog in light drizzle	10	Bag and bin (specific dog poo bin);Bag and bin (home council bin)	Bag and bin (home council bin)	Yes	NA	NA	NA	NA	NA	NA	NA	NA	NA	NA	NA	NA
2020/06/22 5:08:08 PM GMT+1	Dog	Medium (10-20 kg)	15	9	No	NA	NA	NA	NA	NA	NA	NA	NA	NA	NA	NA	No	No	NA	No	NA	2	On a family member's bed	On a family member's bed	Once a year	Every day	Every 3 months	Outdoors	Every week or more	30 minutes	1 hour	Mainly on unpaved surfaces like field margins, forest tracks or the beach	Yes, I walk my dog even if it is raining heavily and my dog gets completely wet	1	Bag and bin (home council bin)	Bag and bin (home council bin)	Yes	NA	NA	NA	NA	NA	NA	NA	NA	NA	NA	NA	NA
2020/06/22 5:08:13 PM GMT+1	Dog	Extra large (over 40 kg)	45	7	Yes	To prevent fleas (or other pests)	No	NA	Advocate	Advocate	4	From a veterinary practice	No	Yes	Yes	No	No	No	NA	No	NA	4	In their own bed;On the furniture	In their own bed	Every month	Every day	Every 3 months	Outdoors	Every week or more	1 hour	3 hours	An equal mixture of the above	Yes, I walk my dog even if it is raining heavily and my dog gets completely wet	10	Bag and bin (specific dog poo bin);Bag and bin (home council bin)	Bag and bin (home council bin)	No	NA	NA	NA	NA	NA	NA	NA	NA	NA	NA	NA	NA
2020/06/22 5:08:31 PM GMT+1	Cat	NA	NA	NA	NA	NA	NA	NA	NA	NA	NA	NA	NA	NA	NA	NA	NA	NA	NA	NA	NA	NA	NA	NA	NA	NA	NA	NA	NA	NA	NA	NA	NA	NA	NA	NA	NA	Large (above 4 kg)	4.2	14	Yes	To prevent fleas (or other pests)	No	NA	Advantage;Frontline or Frontline Combo	Advantage	10	Online	Yes
2020/06/22 5:08:59 PM GMT+1	Dog	Small (4-10kg)	7	<1	Yes	To prevent fleas (or other pests)	No	NA	Advocate;Seresto collar	Advocate	3	From a veterinary practice	Yes	Yes	Yes	No	No	No	NA	Yes	May	3	In their own bed;On a family member's bed;On the floor;In a crate	On a family member's bed	Never	Every day	Every month	At the groomers	Never	1 hour	3 hours	An equal mixture of the above	Yes, I walk my dog even if it is raining heavily and my dog gets completely wet	10	Bag and bin (specific dog poo bin);Bag and bin (home council bin)	Bag and bin (home council bin)	No	NA	NA	NA	NA	NA	NA	NA	NA	NA	NA	NA	NA
2020/06/22 5:09:30 PM GMT+1	Dog	Extra large (over 40 kg)	43	2	Yes	To prevent fleas (or other pests)	No	NA	Advocate	Advocate	3	From a veterinary practice	Yes	Yes	Yes	No	No	No	NA	No	NA	3	In their own bed;On the furniture;On a family member's bed;On the floor	On the furniture	Every 3 months	Every day	Every 6 months	In a bath, sink or shower	Never	2 hours	3 hours	An equal mixture of the above	Yes, I walk my dog even if it is raining heavily and my dog gets completely wet	10	Bag and bin (specific dog poo bin);Bag and bin (home council bin)	Bag and bin (home council bin)	Yes	NA	NA	NA	NA	NA	NA	NA	NA	NA	NA	NA	NA
2020/06/22 5:10:00 PM GMT+1	Dog	Medium (10-20 kg)	13	7	Yes	To prevent fleas (or other pests)	No	NA	Advantage	Advantage	10	Online	Yes	Yes	Yes	Maybe	No	No	NA	Yes	June	1	In their own bed;On the furniture;On a family member's bed;On the floor	On a family member's bed	Every month	Every day	Every month	In a bath, sink or shower	Never	1 hour	3 hours	Mainly on unpaved surfaces like field margins, forest tracks or the beach	Yes, I will walk my dog in light drizzle	10	Bag and bin (specific dog poo bin);Bag and bin (home council bin);Flush down the toilet	Bag and bin (specific dog poo bin)	No	NA	NA	NA	NA	NA	NA	NA	NA	NA	NA	NA	NA
2020/06/22 5:10:38 PM GMT+1	Cat	NA	NA	NA	NA	NA	NA	NA	NA	NA	NA	NA	NA	NA	NA	NA	NA	NA	NA	NA	NA	NA	NA	NA	NA	NA	NA	NA	NA	NA	NA	NA	NA	NA	NA	NA	NA	Small (below 4kg)	3	7	Yes	To prevent fleas (or other pests)	No	NA	Advantage	Advantage	3	Online	No
2020/06/22 5:11:59 PM GMT+1	Dog	Medium (10-20 kg)	14.8	4	Yes	To prevent fleas (or other pests)	No	NA	NexGard Spectra	NexGard Spectra	12	From a veterinary practice	NA	NA	NA	No	No	No	NA	No	NA	12	On the floor	On the floor	Every week or more	Every day	Don't know	Outdoors	Never	1 hour	1 hour	Mainly on unpaved surfaces like field margins, forest tracks or the beach	Yes, I walk my dog even if it is raining heavily and my dog gets completely wet	3	Bag and bin (specific dog poo bin)	None of the above/don't know	No	NA	NA	NA	NA	NA	NA	NA	NA	NA	NA	NA	NA
2020/06/22 5:12:35 PM GMT+1	Dog	Large (20-40kg)	24	10	Yes	To prevent fleas (or other pests)	No	NA	Advocate	Advocate	12	Online	Yes	Yes	Yes	No	Yes	Yes	June	Yes	June	12	On the furniture;On a family member's bed;On the floor	On the furniture	Don't know	Every day	Every 3 months	In a bath, sink or shower	Every week or more	2 hours	3 hours	Mainly on unpaved surfaces like field margins, forest tracks or the beach	Yes, I walk my dog even if it is raining heavily and my dog gets completely wet	10	Straight in a bin (of any kind)	Bag and bin (specific dog poo bin)	No	NA	NA	NA	NA	NA	NA	NA	NA	NA	NA	NA	NA
2020/06/22 5:12:37 PM GMT+1	Dog	Medium (10-20 kg)	13.5	1	Yes	To prevent fleas (or other pests)	No	NA	NexGard	Don't know	11	From a veterinary practice	NA	NA	NA	No	No	No	NA	No	NA	4	In their own bed	On the floor	Every month	Every day	Every 3 months	In a bath, sink or shower	Every 2 weeks	1 hour	6 hours	Mainly on unpaved surfaces like field margins, forest tracks or the beach	Yes, I walk my dog even if it is raining heavily and my dog gets completely wet	9	Bag and bin (specific dog poo bin);Bag and bin (home council bin)	Bag and bin (specific dog poo bin)	No	NA	NA	NA	NA	NA	NA	NA	NA	NA	NA	NA	NA
2020/06/22 5:13:55 PM GMT+1	Cat	NA	NA	NA	NA	NA	NA	NA	NA	NA	NA	NA	NA	NA	NA	NA	NA	NA	NA	NA	NA	NA	NA	NA	NA	NA	NA	NA	NA	NA	NA	NA	NA	NA	NA	NA	NA	Large (above 4 kg)	4.8	11	Yes	To prevent fleas (or other pests)	No	NA	Bravecto	Advocate	4	From a veterinary practice	Yes
2020/06/22 5:14:25 PM GMT+1	Dog	Large (20-40kg)	34	8	Yes	To prevent fleas (or other pests)	No	NA	Bravecto tablet	Bravecto tablet	4	From a veterinary practice	NA	NA	NA	No	No	No	NA	No	NA	4	In their own bed	In their own bed	Every 3 months	Every day	Every 3 months	In a bath, sink or shower	Every 6 months	1 hour	3 hours	Mainly on unpaved surfaces like field margins, forest tracks or the beach	Yes, I walk my dog even if it is raining heavily and my dog gets completely wet	9	Bag and bin (home council bin)	Bag and bin (home council bin)	No	NA	NA	NA	NA	NA	NA	NA	NA	NA	NA	NA	NA
2020/06/22 5:16:42 PM GMT+1	Dog	Medium (10-20 kg)	17	2	Yes	To prevent fleas (or other pests)	No	NA	NexGard Spectra	NexGard Spectra	12	From a veterinary practice	NA	NA	NA	No	No	No	NA	No	NA	12	On a family member's bed	On a family member's bed	Every week or more	Every day	Every 2 weeks	In a bath, sink or shower	Once a year	2 hours	3 hours	An equal mixture of the above	Yes, I will walk my dog in light drizzle	10	Bag and bin (specific dog poo bin)	Bag and bin (specific dog poo bin)	No	NA	NA	NA	NA	NA	NA	NA	NA	NA	NA	NA	NA
2020/06/22 5:19:35 PM GMT+1	Cat	NA	NA	NA	NA	NA	NA	NA	NA	NA	NA	NA	NA	NA	NA	NA	NA	NA	NA	NA	NA	NA	NA	NA	NA	NA	NA	NA	NA	NA	NA	NA	NA	NA	NA	NA	NA	Large (above 4 kg)	NA	13	No	NA	NA	NA	NA	NA	NA	NA	NA
2020/06/22 5:22:20 PM GMT+1	Dog	Small (4-10kg)	8	10	No	NA	NA	NA	NA	NA	NA	NA	NA	NA	NA	NA	No	Yes	Don't know	No	NA	1	On a family member's bed	On a family member's bed	Every 2 weeks	Every day	Once a year	In a bath, sink or shower	Never	1 hour	2 hours	An equal mixture of the above	Occasionally, but I try to avoid this	10	Bag and bin (specific dog poo bin);Bag and bin (home council bin)	Bag and bin (home council bin)	No	NA	NA	NA	NA	NA	NA	NA	NA	NA	NA	NA	NA
2020/06/22 5:26:48 PM GMT+1	Dog	Medium (10-20 kg)	16	9	Yes	To prevent fleas (or other pests)	No	NA	Advocate;Bravecto tablet	Advocate	12	From a veterinary practice	No	NA	NA	No	No	No	NA	Yes	June	2	On a family member's bed	On a family member's bed	Every 3 months	Every day	Every month	In a bath, sink or shower	Once a year	2 hours	3 hours	An equal mixture of the above	Yes, I walk my dog even if it is raining heavily and my dog gets completely wet	10	Bag and bin (specific dog poo bin)	Bag and bin (specific dog poo bin)	No	NA	NA	NA	NA	NA	NA	NA	NA	NA	NA	NA	NA
2020/06/22 5:28:05 PM GMT+1	Dog	Large (20-40kg)	32	11	No	NA	NA	NA	NA	NA	NA	NA	NA	NA	NA	NA	No	No	NA	No	NA	4	In their own bed;On the floor	In their own bed	Every 2 weeks	Every day	Every month	At the groomers	Never	30 minutes	3 hours	An equal mixture of the above	Yes, I walk my dog even if it is raining heavily and my dog gets completely wet	10	Bag and bin (specific dog poo bin);Bag and bin (home council bin)	Bag and bin (home council bin)	No	NA	NA	NA	NA	NA	NA	NA	NA	NA	NA	NA	NA
2020/06/22 5:28:53 PM GMT+1	Cat	NA	NA	NA	NA	NA	NA	NA	NA	NA	NA	NA	NA	NA	NA	NA	NA	NA	NA	NA	NA	NA	NA	NA	NA	NA	NA	NA	NA	NA	NA	NA	NA	NA	NA	NA	NA	Large (above 4 kg)	NA	3	Yes	In response to a flea infestation	No	NA	Advantage;Frontline or Frontline Combo	Advantage	10	Online	No
2020/06/22 5:29:00 PM GMT+1	Cat	NA	NA	NA	NA	NA	NA	NA	NA	NA	NA	NA	NA	NA	NA	NA	NA	NA	NA	NA	NA	NA	NA	NA	NA	NA	NA	NA	NA	NA	NA	NA	NA	NA	NA	NA	NA	Small (below 4kg)	3.5	5	No	NA	NA	NA	NA	NA	NA	NA	NA
2020/06/22 5:29:36 PM GMT+1	Dog	Large (20-40kg)	26	11	Yes	To prevent fleas (or other pests)	No	NA	Bob Martin Clear /Clear Plus (Fipronil);Frontline or Frontline Combo spot on	Bob Martin Clear /Clear Plus (Fipronil)	2	Online	Yes	No	NA	No	Yes	Yes	May;June	Yes	March;April;May;June;July;August;September	4	In their own bed	In their own bed	Every 6 months	Every day	Every 6 months	Outdoors	Every week or more	30 minutes	6 hours	Mainly on unpaved surfaces like field margins, forest tracks or the beach	Yes, I will walk my dog in light drizzle	1	Bury in the ground	None of the above/don't know	Yes	NA	NA	NA	NA	NA	NA	NA	NA	NA	NA	NA	NA
2020/06/22 5:29:49 PM GMT+1	Dog	Medium (10-20 kg)	14	8	Yes	To prevent fleas (or other pests)	Yes	Herbal treatment called No More Bites	None only Herbal used	Only Herbal	12	Online	Yes	Yes	Yes	No	No	No	NA	No	NA	12	In their own bed	In their own bed	Every 2 weeks	Every day	Every month	At the groomers	Every 3 months	1 hour	3 hours	Mainly on paved surfaces	Occasionally, but I try to avoid this	10	Bag and bin (specific dog poo bin)	Bag and bin (specific dog poo bin)	No	NA	NA	NA	NA	NA	NA	NA	NA	NA	NA	NA	NA
2020/06/22 5:30:29 PM GMT+1	Dog	Small (4-10kg)	9	10	No	NA	NA	NA	NA	NA	NA	NA	NA	NA	NA	NA	No	No	NA	No	NA	2	On a family member's bed	On a family member's bed	Once a year	Every day	Every 3 months	In a bath, sink or shower	Never	1 hour	2 hours	An equal mixture of the above	Yes, I walk my dog even if it is raining heavily and my dog gets completely wet	10	Bag and bin (home council bin)	Bag and bin (home council bin)	No	NA	NA	NA	NA	NA	NA	NA	NA	NA	NA	NA	NA
2020/06/22 5:31:58 PM GMT+1	Dog	Medium (10-20 kg)	15.5	4	No	NA	NA	NA	NA	NA	NA	NA	NA	NA	NA	NA	No	No	NA	No	NA	1	In their own bed;On the furniture;On the floor	On the furniture	Every 2 weeks	Every day	Less than once a year	In a bath, sink or shower	Never	2 hours	3 hours	An equal mixture of the above	Yes, I will walk my dog in light drizzle	10	Bag and bin (specific dog poo bin);Bag and bin (home council bin)	Bag and bin (specific dog poo bin)	No	NA	NA	NA	NA	NA	NA	NA	NA	NA	NA	NA	NA
2020/06/22 5:32:13 PM GMT+1	Dog	Medium (10-20 kg)	11	4	Yes	To prevent fleas (or other pests)	Yes	Vita Canis - tick off	Bravecto tablet	Bravecto tablet	4	From a veterinary practice	NA	NA	NA	No	No	No	NA	Yes	May	3	In a crate	In a crate	Every 2 weeks	Every day	Every month	In a bath, sink or shower	Every month	30 minutes	2 hours	Mainly on paved surfaces	Yes, I will walk my dog in light drizzle	10	Bag and bin (specific dog poo bin);Bag and bin (home council bin)	Bag and bin (specific dog poo bin)	No	NA	NA	NA	NA	NA	NA	NA	NA	NA	NA	NA	NA
2020/06/22 5:33:15 PM GMT+1	Cat	NA	NA	NA	NA	NA	NA	NA	NA	NA	NA	NA	NA	NA	NA	NA	NA	NA	NA	NA	NA	NA	NA	NA	NA	NA	NA	NA	NA	NA	NA	NA	NA	NA	NA	NA	NA	Small (below 4kg)	3	1	Yes	To prevent fleas (or other pests)	No	NA	Bravecto	Bravecto	3	From a veterinary practice	No
2020/06/22 5:35:16 PM GMT+1	Dog	Large (20-40kg)	22	2	No	NA	NA	NA	NA	NA	NA	NA	NA	NA	NA	NA	No	No	NA	No	NA	2	In their own bed;On the furniture;On a family member's bed;On the floor	On the furniture	Every week or more	Every day	Every week or more	In a bath, sink or shower	Never	1 hour	3 hours	An equal mixture of the above	Yes, I will walk my dog in light drizzle	10	Bag and bin (specific dog poo bin);Bag and bin (home council bin);Straight in a bin (of any kind)	Straight in a bin (of any kind)	Yes	NA	NA	NA	NA	NA	NA	NA	NA	NA	NA	NA	NA
2020/06/22 5:35:18 PM GMT+1	Cat	NA	NA	NA	NA	NA	NA	NA	NA	NA	NA	NA	NA	NA	NA	NA	NA	NA	NA	NA	NA	NA	NA	NA	NA	NA	NA	NA	NA	NA	NA	NA	NA	NA	NA	NA	NA	Large (above 4 kg)	4.1	7	Yes	To prevent fleas (or other pests)	No	NA	Broadline	Broadline	10	From a veterinary practice	Yes
2020/06/22 5:35:50 PM GMT+1	Dog	Medium (10-20 kg)	18	1	Yes	To prevent fleas (or other pests)	No	NA	Advantage;Bob Martin Clear /Clear Plus (Fipronil);Frontline or Frontline Combo spot on	Bob Martin Clear /Clear Plus (Fipronil)	3	From a petshop	No	Yes	Yes	No	Yes	Yes	May;June;July;August;September	Yes	July;August	2	In their own bed;On the furniture;On a family member's bed;On the floor	On the furniture	Every week or more	Every day	Every 6 months	In a bath, sink or shower	Once a year	1 hour	3 hours	An equal mixture of the above	Yes, I will walk my dog in light drizzle	10	Bag and bin (specific dog poo bin);Bag and bin (home council bin)	Bag and bin (home council bin)	No	NA	NA	NA	NA	NA	NA	NA	NA	NA	NA	NA	NA
2020/06/22 5:36:09 PM GMT+1	Dog	Medium (10-20 kg)	15	10	Yes	To prevent fleas (or other pests)	No	NA	Seresto collar	Seresto collar	1	Online	NA	Yes	NA	No	No	No	NA	No	NA	1	On a family member's bed	On a family member's bed	Every week or more	Every day	Every 3 months	At the groomers	Less than once a year	1 hour	6 hours	Mainly on paved surfaces	Yes, I walk my dog even if it is raining heavily and my dog gets completely wet	10	Bag and bin (home council bin)	Bag and bin (home council bin)	No	NA	NA	NA	NA	NA	NA	NA	NA	NA	NA	NA	NA
2020/06/22 5:36:26 PM GMT+1	Cat	NA	NA	NA	NA	NA	NA	NA	NA	NA	NA	NA	NA	NA	NA	NA	NA	NA	NA	NA	NA	NA	NA	NA	NA	NA	NA	NA	NA	NA	NA	NA	NA	NA	NA	NA	NA	Large (above 4 kg)	NA	13	Yes	To prevent fleas (or other pests)	No	NA	Advantage;Effipro Spot On;Itch - flea	Advantage	10	Online	Yes
2020/06/22 5:36:39 PM GMT+1	Dog	Large (20-40kg)	35	4	Yes	In response to other pests (eg ticks)	No	NA	NexGard Spectra	NexGard Spectra	8	From a veterinary practice	NA	NA	NA	No	No	No	NA	No	NA	3	In their own bed;On the furniture;On a family member's bed;On the floor	On the furniture	Every week or more	Every day	Never	NA	Every week or more	30 minutes	6 hours	Mainly on unpaved surfaces like field margins, forest tracks or the beach	Occasionally, but I try to avoid this	10	Bag and bin (specific dog poo bin);Bag and bin (home council bin)	Bag and bin (specific dog poo bin)	No	NA	NA	NA	NA	NA	NA	NA	NA	NA	NA	NA	NA
2020/06/22 5:38:16 PM GMT+1	Cat	NA	NA	NA	NA	NA	NA	NA	NA	NA	NA	NA	NA	NA	NA	NA	NA	NA	NA	NA	NA	NA	NA	NA	NA	NA	NA	NA	NA	NA	NA	NA	NA	NA	NA	NA	NA	Small (below 4kg)	NA	7	Yes	In response to a flea infestation	No	NA	Frontline or Frontline Combo	Frontline or Frontline Combo	2	From a veterinary practice	Yes
2020/06/22 5:38:30 PM GMT+1	Dog	Medium (10-20 kg)	18	1	Yes	In response to a flea infestation	Yes	Diatomaceous earth	Endectrid;Frontline or Frontline Combo spot on	Endectrid	5	From a veterinary practice	Yes	Yes	Yes	No	Yes	Yes	April;May;June	Yes	April;May;June	3	In their own bed;On the floor	In their own bed	Every week or more	Every day	Every month	In a bath, sink or shower	Every week or more	2 hours	2 hours	Mainly on unpaved surfaces like field margins, forest tracks or the beach	Yes, I walk my dog even if it is raining heavily and my dog gets completely wet	10	Bag and bin (specific dog poo bin);Bag and bin (home council bin)	Bag and bin (specific dog poo bin)	No	NA	NA	NA	NA	NA	NA	NA	NA	NA	NA	NA	NA
2020/06/22 5:39:12 PM GMT+1	Dog	Large (20-40kg)	37	5	Yes	To prevent fleas (or other pests)	No	NA	NexGard Spectra	NexGard Spectra	4	From a veterinary practice	NA	NA	NA	No	No	No	NA	Yes	May;June	4	In their own bed;On the furniture;On a family member's bed;On the floor	On a family member's bed	Every 2 weeks	Every day	Every 6 months	Outdoors	Every week or more	2 hours	6 hours	Mainly on unpaved surfaces like field margins, forest tracks or the beach	Yes, I walk my dog even if it is raining heavily and my dog gets completely wet	8	Bag and bin (specific dog poo bin);Bag and bin (home council bin)	Bag and bin (specific dog poo bin)	No	NA	NA	NA	NA	NA	NA	NA	NA	NA	NA	NA	NA
2020/06/22 5:39:21 PM GMT+1	Dog	Large (20-40kg)	30	8	Yes	To prevent fleas (or other pests)	No	NA	Bravecto tablet	Bravecto tablet	4	From a veterinary practice	NA	NA	NA	No	No	No	NA	No	NA	4	In their own bed;On the furniture;On a family member's bed	In their own bed	Every 3 months	Every day	Every 6 months	In a bath, sink or shower	Every month	2 hours	3 hours	An equal mixture of the above	Yes, I walk my dog even if it is raining heavily and my dog gets completely wet	8	Bag and bin (specific dog poo bin);Bag and bin (home council bin);Straight in a bin (of any kind)	Bag and bin (specific dog poo bin)	No	NA	NA	NA	NA	NA	NA	NA	NA	NA	NA	NA	NA
2020/06/22 5:39:49 PM GMT+1	Dog	Large (20-40kg)	29	1	Yes	To prevent fleas (or other pests)	No	NA	Advocate;Stronghold	Stronghold	12	From a veterinary practice	Yes	Yes	Yes	No	No	No	NA	No	NA	4	In their own bed;On the floor;In a crate	In a crate	Every 2 weeks	Every day	Less than once a year	In a bath, sink or shower	Every week or more	1 hour	3 hours	An equal mixture of the above	Yes, I will walk my dog in light drizzle	10	Bag and bin (specific dog poo bin);Bag and bin (home council bin)	Bag and bin (home council bin)	No	NA	NA	NA	NA	NA	NA	NA	NA	NA	NA	NA	NA
2020/06/22 5:40:10 PM GMT+1	Dog	Large (20-40kg)	35	8	Yes	To prevent fleas (or other pests)	No	NA	Advantix;Bravecto tablet	Advantix	4	From a veterinary practice	NA	NA	NA	No	No	No	NA	No	NA	4	In their own bed	On the floor	Every month	Every day	Every month	Outdoors	Less than once a year	1 hour	2 hours	An equal mixture of the above	Yes, I walk my dog even if it is raining heavily and my dog gets completely wet	9	Bag and bin (specific dog poo bin);Bag and bin (home council bin)	Bag and bin (home council bin)	No	NA	NA	NA	NA	NA	NA	NA	NA	NA	NA	NA	NA
2020/06/22 5:40:53 PM GMT+1	Dog	Medium (10-20 kg)	24	8	Yes	To prevent fleas (or other pests)	No	NA	Bravecto tablet	Bravecto tablet	2	From a veterinary practice	NA	NA	NA	NA	No	No	NA	No	NA	1	On the floor	In their own bed	Every week or more	Every day	Every month	At the groomers	Never	3 hours	3 hours	An equal mixture of the above	Yes, I walk my dog even if it is raining heavily and my dog gets completely wet	0	Bag and bin (specific dog poo bin);Bag and bin (home council bin)	Bag and bin (home council bin)	No	NA	NA	NA	NA	NA	NA	NA	NA	NA	NA	NA	NA
2020/06/22 5:40:53 PM GMT+1	Cat	NA	NA	NA	NA	NA	NA	NA	NA	NA	NA	NA	NA	NA	NA	NA	NA	NA	NA	NA	NA	NA	NA	NA	NA	NA	NA	NA	NA	NA	NA	NA	NA	NA	NA	NA	NA	Small (below 4kg)	4	15	Yes	To prevent fleas (or other pests)	No	NA	Advantage;Frontline or Frontline Combo	Advantage	7	Online	Yes
2020/06/22 5:41:12 PM GMT+1	Dog	Medium (10-20 kg)	20	11	Yes	To prevent fleas (or other pests)	No	NA	Advocate;Advantage;Effipro Spot On;Fipnil/ Fipralone/ Fiprene/ Fiprex/ Fiproclear/ Fiprofile/ Fipronil/ Fiprotec/ Fiproxole/ Fleanil/ Fleascreen/ Flevox/ Flick/ Fyperix	Advantage	10	From a petshop	Yes	Yes	Yes	No	Yes	Yes	March;May	No	NA	3	On the furniture;On the floor	On the floor	Don't know	Every day	Every 6 months	In a bath, sink or shower	Every week or more	30 minutes	3 hours	Mainly on unpaved surfaces like field margins, forest tracks or the beach	Occasionally, but I try to avoid this	10	Bag and bin (home council bin)	Bag and bin (home council bin)	No	NA	NA	NA	NA	NA	NA	NA	NA	NA	NA	NA	NA
2020/06/22 5:41:59 PM GMT+1	Cat	NA	NA	NA	NA	NA	NA	NA	NA	NA	NA	NA	NA	NA	NA	NA	NA	NA	NA	NA	NA	NA	NA	NA	NA	NA	NA	NA	NA	NA	NA	NA	NA	NA	NA	NA	NA	Small (below 4kg)	2	17	Yes	To prevent fleas (or other pests)	No	NA	Don't know	Don't know	4	From a veterinary practice	Yes
2020/06/22 5:42:17 PM GMT+1	Cat	NA	NA	NA	NA	NA	NA	NA	NA	NA	NA	NA	NA	NA	NA	NA	NA	NA	NA	NA	NA	NA	NA	NA	NA	NA	NA	NA	NA	NA	NA	NA	NA	NA	NA	NA	NA	Large (above 4 kg)	4.2	13	Yes	To prevent fleas (or other pests)	No	NA	Advocate	Advocate	4	From a veterinary practice	No
2020/06/22 5:44:09 PM GMT+1	Cat	NA	NA	NA	NA	NA	NA	NA	NA	NA	NA	NA	NA	NA	NA	NA	NA	NA	NA	NA	NA	NA	NA	NA	NA	NA	NA	NA	NA	NA	NA	NA	NA	NA	NA	NA	NA	Large (above 4 kg)	4.2	11	Yes	To prevent fleas (or other pests)	No	NA	Frontline or Frontline Combo	Frontline or Frontline Combo	12	From a veterinary practice	Yes
2020/06/22 5:45:04 PM GMT+1	Dog	Large (20-40kg)	23	4	Yes	To prevent fleas (or other pests)	No	NA	NexGard Spectra	NexGard	3	From a veterinary practice	NA	NA	NA	No	No	No	NA	Yes	May	3	In a crate	In a crate	Every 3 months	Every day	Every week or more	In a bath, sink or shower	Every 2 weeks	30 minutes	1 hour	An equal mixture of the above	Yes, I will walk my dog in light drizzle	10	Bag and bin (specific dog poo bin);Bag and bin (home council bin)	Bag and bin (home council bin)	No	NA	NA	NA	NA	NA	NA	NA	NA	NA	NA	NA	NA
2020/06/22 5:45:19 PM GMT+1	Cat	NA	NA	NA	NA	NA	NA	NA	NA	NA	NA	NA	NA	NA	NA	NA	NA	NA	NA	NA	NA	NA	NA	NA	NA	NA	NA	NA	NA	NA	NA	NA	NA	NA	NA	NA	NA	Large (above 4 kg)	5	2	No	NA	NA	NA	NA	NA	NA	NA	NA
2020/06/22 5:45:38 PM GMT+1	Dog	Large (20-40kg)	NA	4	Yes	In response to a flea infestation	No	NA	Bravecto tablet	Bravecto tablet	2	From a veterinary practice	Yes	Yes	Yes	No	Yes	Yes	April	No	NA	1	In their own bed;On the floor	On the floor	Every 2 weeks	Every day	Every month	In a bath, sink or shower	Every 2 weeks	1 hour	2 hours	Mainly on unpaved surfaces like field margins, forest tracks or the beach	Occasionally, but I try to avoid this	10	Bag and bin (specific dog poo bin);Bag and bin (home council bin)	Bag and bin (specific dog poo bin)	No	NA	NA	NA	NA	NA	NA	NA	NA	NA	NA	NA	NA
2020/06/22 5:45:52 PM GMT+1	Dog	Small (4-10kg)	8	5	Yes	To prevent fleas (or other pests)	Yes	Billy No Mates	Advocate	Advocate	12	From a veterinary practice	Yes	Yes	Yes	No	No	No	NA	No	NA	1	In their own bed;On a family member's bed;On the floor	On the floor	Every week or more	Every day	Every month	At the groomers	Never	2 hours	2 hours	Mainly on unpaved surfaces like field margins, forest tracks or the beach	Yes, I walk my dog even if it is raining heavily and my dog gets completely wet	10	Bag and bin (specific dog poo bin)	Bag and bin (specific dog poo bin)	No	NA	NA	NA	NA	NA	NA	NA	NA	NA	NA	NA	NA
2020/06/22 5:45:59 PM GMT+1	Dog	Medium (10-20 kg)	12	5	Yes	To prevent fleas (or other pests)	No	NA	Frontline or Frontline Combo spot on	Frontline or Frontline Combo spot on	4	From a petshop	Yes	Yes	Yes	No	Yes	No	NA	No	NA	4	In their own bed	In their own bed	Every week or more	Every day	Every month	In a bath, sink or shower	Every week or more	1 hour	6 hours	An equal mixture of the above	Yes, I will walk my dog in light drizzle	10	Bag and bin (specific dog poo bin);Bag and bin (home council bin)	Bag and bin (home council bin)	No	NA	NA	NA	NA	NA	NA	NA	NA	NA	NA	NA	NA
2020/06/22 5:46:56 PM GMT+1	Dog	Large (20-40kg)	23.5	8	Yes	In response to a flea infestation	No	NA	Bravecto tablet	Bravecto tablet	1	From a veterinary practice	Don't know	Yes	NA	No	Yes	Yes	March	No	NA	1	In their own bed;On the furniture;On a family member's bed;On the floor	On a family member's bed	Every month	Every day	Every 3 months	In a bath, sink or shower	Never	1 hour	3 hours	Mainly on unpaved surfaces like field margins, forest tracks or the beach	Yes, I walk my dog even if it is raining heavily and my dog gets completely wet	9	Bag and bin (specific dog poo bin);Bag and bin (home council bin)	Bag and bin (home council bin)	No	NA	NA	NA	NA	NA	NA	NA	NA	NA	NA	NA	NA
2020/06/22 5:47:24 PM GMT+1	Cat	NA	NA	NA	NA	NA	NA	NA	NA	NA	NA	NA	NA	NA	NA	NA	NA	NA	NA	NA	NA	NA	NA	NA	NA	NA	NA	NA	NA	NA	NA	NA	NA	NA	NA	NA	NA	Large (above 4 kg)	5.33	14	Yes	To prevent fleas (or other pests)	No	NA	Bravecto;Milbemax every 4 weeks ( relentless hunter ! ) Bravecto every 12 weeks.	Bravecto	4	From a veterinary practice	Yes
2020/06/22 5:47:26 PM GMT+1	Cat	NA	NA	NA	NA	NA	NA	NA	NA	NA	NA	NA	NA	NA	NA	NA	NA	NA	NA	NA	NA	NA	NA	NA	NA	NA	NA	NA	NA	NA	NA	NA	NA	NA	NA	NA	NA	Large (above 4 kg)	NA	11	Yes	To prevent fleas (or other pests)	No	NA	Effipro Spot On	Effipro Spot On	12	Online	Yes
2020/06/22 5:47:39 PM GMT+1	Cat	NA	NA	NA	NA	NA	NA	NA	NA	NA	NA	NA	NA	NA	NA	NA	NA	NA	NA	NA	NA	NA	NA	NA	NA	NA	NA	NA	NA	NA	NA	NA	NA	NA	NA	NA	NA	Large (above 4 kg)	NA	3	No	NA	NA	NA	NA	NA	NA	NA	NA
2020/06/22 5:48:42 PM GMT+1	Dog	Medium (10-20 kg)	15	8	Yes	To prevent fleas (or other pests)	No	NA	Bravecto tablet;NexGard Spectra	NexGard Spectra	10	From a veterinary practice	NA	NA	NA	No	No	No	NA	No	NA	10	In their own bed;On the furniture;On the floor	In their own bed	Never	Every day	Every month	In a bath, sink or shower	Every 2 weeks	1 hour	2 hours	Mainly on unpaved surfaces like field margins, forest tracks or the beach	Yes, I walk my dog even if it is raining heavily and my dog gets completely wet	9	Bag and bin (specific dog poo bin);Bag and bin (home council bin)	Bag and bin (home council bin)	No	NA	NA	NA	NA	NA	NA	NA	NA	NA	NA	NA	NA
2020/06/22 5:48:49 PM GMT+1	Cat	NA	NA	NA	NA	NA	NA	NA	NA	NA	NA	NA	NA	NA	NA	NA	NA	NA	NA	NA	NA	NA	NA	NA	NA	NA	NA	NA	NA	NA	NA	NA	NA	NA	NA	NA	NA	Small (below 4kg)	3.7	7	Yes	To prevent fleas (or other pests)	No	NA	Advocate	Advocate	11	From a veterinary practice	Yes
2020/06/22 5:50:16 PM GMT+1	Dog	Large (20-40kg)	23.7	<1	Yes	To prevent fleas (or other pests)	No	NA	Advocate	Advocate	3	From a veterinary practice	Yes	Yes	Yes	Maybe	No	No	NA	No	NA	5	In their own bed;On the furniture;On a family member's bed;On the floor	On the floor	Every 2 weeks	Every day	Every month	At the groomers	Every week or more	1 hour	6 hours	Mainly on unpaved surfaces like field margins, forest tracks or the beach	Yes, I walk my dog even if it is raining heavily and my dog gets completely wet	10	Bag and bin (specific dog poo bin);Bag and bin (home council bin)	Bag and bin (specific dog poo bin)	No	NA	NA	NA	NA	NA	NA	NA	NA	NA	NA	NA	NA
2020/06/22 5:51:01 PM GMT+1	Dog	Large (20-40kg)	30	3	No	NA	NA	NA	NA	NA	NA	NA	NA	NA	NA	NA	No	No	NA	No	NA	2	In their own bed;On the floor	On the floor	Less than once a year	Every day	Every month	At the groomers	Less than once a year	2 hours	6 hours	Mainly on unpaved surfaces like field margins, forest tracks or the beach	Yes, I walk my dog even if it is raining heavily and my dog gets completely wet	10	Bag and bin (specific dog poo bin)	Bag and bin (specific dog poo bin)	No	NA	NA	NA	NA	NA	NA	NA	NA	NA	NA	NA	NA
2020/06/22 5:52:17 PM GMT+1	Dog	Small (4-10kg)	NA	4	Yes	To prevent fleas (or other pests)	Don't know	NA	NexGard Spectra	NexGard Spectra	12	From a veterinary practice	NA	NA	NA	No	No	No	NA	No	NA	4	On a family member's bed	On a family member's bed	Every week or more	Every day	Every 3 months	In a bath, sink or shower	Every month	2 hours	3 hours	Mainly on unpaved surfaces like field margins, forest tracks or the beach	Yes, I walk my dog even if it is raining heavily and my dog gets completely wet	10	Bag and bin (specific dog poo bin)	Bag and bin (specific dog poo bin)	No	NA	NA	NA	NA	NA	NA	NA	NA	NA	NA	NA	NA
2020/06/22 5:52:41 PM GMT+1	Cat	NA	NA	NA	NA	NA	NA	NA	NA	NA	NA	NA	NA	NA	NA	NA	NA	NA	NA	NA	NA	NA	NA	NA	NA	NA	NA	NA	NA	NA	NA	NA	NA	NA	NA	NA	NA	Small (below 4kg)	3	12	Yes	To prevent fleas (or other pests)	No	NA	Bravecto;Frontline or Frontline Combo	Bravecto	4	From a veterinary practice	Yes
2020/06/22 5:52:52 PM GMT+1	Cat	NA	NA	NA	NA	NA	NA	NA	NA	NA	NA	NA	NA	NA	NA	NA	NA	NA	NA	NA	NA	NA	NA	NA	NA	NA	NA	NA	NA	NA	NA	NA	NA	NA	NA	NA	NA	Small (below 4kg)	3	3	Yes	To prevent fleas (or other pests)	No	NA	Advantage;Effipro Spot On;Fipnil/Fipralone/Fiprene/ Fiprex/ Fiproclear/Fiprofile/Fipronil/Fiprotec/Fiproxole/Fleanil/Fleascreen/Flevox/Flick/Fyperix	Advantage	6	Online	No
2020/06/22 5:52:57 PM GMT+1	Dog	Medium (10-20 kg)	NA	10	Yes	To prevent fleas (or other pests)	No	NA	NexGard Spectra	NexGard Spectra	4	From a veterinary practice	No	NA	NA	No	No	No	NA	No	NA	4	In their own bed;On the floor	In their own bed	Every 3 months	Every day	Never	NA	Every 3 months	1 hour	3 hours	Mainly on unpaved surfaces like field margins, forest tracks or the beach	Yes, I walk my dog even if it is raining heavily and my dog gets completely wet	3	Bag and bin (specific dog poo bin);Bag and bin (home council bin)	Bag and bin (home council bin)	No	NA	NA	NA	NA	NA	NA	NA	NA	NA	NA	NA	NA
2020/06/22 5:53:59 PM GMT+1	Dog	Large (20-40kg)	28	6	Yes	To prevent fleas (or other pests)	No	NA	Bravecto tablet	Bravecto tablet	2	From a veterinary practice	NA	NA	NA	No	No	No	NA	Yes	May	2	In their own bed	In their own bed	Every 2 weeks	Every day	Every week or more	In a bath, sink or shower	Every week or more	2 hours	3 hours	Mainly on unpaved surfaces like field margins, forest tracks or the beach	Yes, I walk my dog even if it is raining heavily and my dog gets completely wet	10	Bag and bin (specific dog poo bin)	Bag and bin (home council bin)	No	NA	NA	NA	NA	NA	NA	NA	NA	NA	NA	NA	NA
2020/06/22 5:54:35 PM GMT+1	Cat	NA	NA	NA	NA	NA	NA	NA	NA	NA	NA	NA	NA	NA	NA	NA	NA	NA	NA	NA	NA	NA	NA	NA	NA	NA	NA	NA	NA	NA	NA	NA	NA	NA	NA	NA	NA	Small (below 4kg)	2.6	11	Yes	To prevent fleas (or other pests)	No	NA	Frontline or Frontline Combo	Frontline or Frontline Combo	12	From a petshop	Yes
2020/06/22 5:54:38 PM GMT+1	Cat	NA	NA	NA	NA	NA	NA	NA	NA	NA	NA	NA	NA	NA	NA	NA	NA	NA	NA	NA	NA	NA	NA	NA	NA	NA	NA	NA	NA	NA	NA	NA	NA	NA	NA	NA	NA	Small (below 4kg)	4	15	Yes	To prevent fleas (or other pests)	No	NA	Advocate;Bravecto	Bravecto	4	From a veterinary practice	No
2020/06/22 5:55:04 PM GMT+1	Dog	Extra large (over 40 kg)	43	2	No	NA	NA	NA	NA	NA	NA	NA	NA	NA	NA	NA	No	No	NA	Yes	March;April;May;June	None	On a family member's bed	On a family member's bed	Every 2 weeks	Every day	Less than once a year	Outdoors	Every week or more	1 hour	6 hours	Mainly on unpaved surfaces like field margins, forest tracks or the beach	Yes, I will walk my dog in light drizzle	10	Bag and bin (specific dog poo bin)	Bag and bin (home council bin)	No	NA	NA	NA	NA	NA	NA	NA	NA	NA	NA	NA	NA
2020/06/22 5:55:49 PM GMT+1	Cat	NA	NA	NA	NA	NA	NA	NA	NA	NA	NA	NA	NA	NA	NA	NA	NA	NA	NA	NA	NA	NA	NA	NA	NA	NA	NA	NA	NA	NA	NA	NA	NA	NA	NA	NA	NA	Small (below 4kg)	2.8	18	No	NA	NA	NA	NA	NA	NA	NA	NA
2020/06/22 5:55:53 PM GMT+1	Cat	NA	NA	NA	NA	NA	NA	NA	NA	NA	NA	NA	NA	NA	NA	NA	NA	NA	NA	NA	NA	NA	NA	NA	NA	NA	NA	NA	NA	NA	NA	NA	NA	NA	NA	NA	NA	Large (above 4 kg)	4.5	6	Yes	To prevent fleas (or other pests)	No	NA	Bravecto	Bravecto	4	From a veterinary practice	Yes
2020/06/22 5:56:31 PM GMT+1	Cat	NA	NA	NA	NA	NA	NA	NA	NA	NA	NA	NA	NA	NA	NA	NA	NA	NA	NA	NA	NA	NA	NA	NA	NA	NA	NA	NA	NA	NA	NA	NA	NA	NA	NA	NA	NA	Large (above 4 kg)	5	11	Yes	To prevent fleas (or other pests)	No	NA	Seresto collar	Seresto collar	2	From a veterinary practice	NA
2020/06/22 5:58:20 PM GMT+1	Dog	Medium (10-20 kg)	10	3	Yes	To prevent fleas (or other pests)	No	NA	Frontline or Frontline Combo spot on	Frontline or Frontline Combo spot on	Don't know	From a veterinary practice	NA	NA	NA	No	Don't know	No	NA	No	NA	1	In their own bed;On the furniture	On the furniture	Every month	Every day	Every month	At the groomers	Every 6 months	3 hours	6 hours	Mainly on unpaved surfaces like field margins, forest tracks or the beach	Yes, I walk my dog even if it is raining heavily and my dog gets completely wet	10	Bag and bin (specific dog poo bin);Bag and bin (home council bin)	Bag and bin (home council bin)	No	NA	NA	NA	NA	NA	NA	NA	NA	NA	NA	NA	NA
2020/06/22 5:58:51 PM GMT+1	Dog	Medium (10-20 kg)	15	7	Yes	In response to other pests (eg ticks)	No	NA	Seresto collar	Seresto collar	1	From a veterinary practice	NA	NA	NA	No	Yes	No	NA	Yes	April	3	On a family member's bed	On a family member's bed	Every month	Every day	Every week or more	In a bath, sink or shower	Less than once a year	1 hour	6 hours	Mainly on unpaved surfaces like field margins, forest tracks or the beach	Occasionally, but I try to avoid this	3	Bag and bin (specific dog poo bin);Bag and bin (home council bin)	Bag and bin (specific dog poo bin)	No	NA	NA	NA	NA	NA	NA	NA	NA	NA	NA	NA	NA
2020/06/22 5:59:03 PM GMT+1	Dog	Large (20-40kg)	22	6	Yes	To prevent fleas (or other pests)	No	NA	Advocate;NexGard Spectra	Advocate	3	From a veterinary practice	Yes	Yes	Yes	No	No	No	NA	No	NA	3	In their own bed	In their own bed	Every week or more	Every 2 days	Every 3 months	In a bath, sink or shower	Once a year	My dog doesn't go for walks	1 hour	NA	NA	10	Bag and bin (home council bin)	Bag and bin (specific dog poo bin)	No	NA	NA	NA	NA	NA	NA	NA	NA	NA	NA	NA	NA
2020/06/22 5:59:33 PM GMT+1	Dog	Medium (10-20 kg)	12	3	Yes	To prevent fleas (or other pests)	Yes	While vinegar in drinking water	Stronghold	Stronghold	11	From a veterinary practice	Yes	Yes	Yes	No	No	No	NA	No	NA	4	In their own bed;On the furniture;On a family member's bed;On the floor	In their own bed	Every 3 months	Every day	Every 3 months	At the groomers	Never	1 hour	3 hours	An equal mixture of the above	Yes, I will walk my dog in light drizzle	10	Bag and bin (specific dog poo bin);Bag and bin (home council bin)	Bag and bin (home council bin)	No	NA	NA	NA	NA	NA	NA	NA	NA	NA	NA	NA	NA
2020/06/22 6:00:19 PM GMT+1	Dog	Medium (10-20 kg)	12	10	Yes	In response to other pests (eg ticks)	No	NA	Frontline or Frontline Combo spot on	Frontline or Frontline Combo spot on	6	Other type of shop - pharmacy/agricultural/equestrian/other	Yes	Yes	Yes	No	No	No	NA	Yes	March;April;May;June;July;August;September	2	In their own bed;On the furniture;On a family member's bed	On the furniture	Once a year	Every day	Every month	Outdoors	Never	2 hours	3 hours	Mainly on unpaved surfaces like field margins, forest tracks or the beach	Yes, I walk my dog even if it is raining heavily and my dog gets completely wet	10	None of the above/don't know	None of the above/don't know	No	NA	NA	NA	NA	NA	NA	NA	NA	NA	NA	NA	NA
2020/06/22 6:00:28 PM GMT+1	Dog	Large (20-40kg)	38	4	Yes	To prevent fleas (or other pests)	No	NA	Advantage	Advantage	3	Online	Yes	Yes	Yes	No	No	No	NA	Yes	April;May	4	On the furniture;On a family member's bed	On a family member's bed	Every 2 weeks	Every day	Every month	In a bath, sink or shower	Every week or more	1 hour	2 hours	An equal mixture of the above	Yes, I walk my dog even if it is raining heavily and my dog gets completely wet	10	Bag and bin (specific dog poo bin);Bag and bin (home council bin)	Bag and bin (home council bin)	No	NA	NA	NA	NA	NA	NA	NA	NA	NA	NA	NA	NA
2020/06/22 6:01:01 PM GMT+1	Dog	Medium (10-20 kg)	12	<1	Yes	To prevent fleas (or other pests)	No	NA	Advocate	Advocate	6	From a veterinary practice	Yes	No	NA	No	No	No	NA	No	NA	7	In their own bed;In a crate	In a crate	Every month	Every day	Every month	At the groomers	Never	1 hour	3 hours	Mainly on paved surfaces	Yes, I will walk my dog in light drizzle	10	Bag and bin (home council bin)	Bag and bin (home council bin)	No	NA	NA	NA	NA	NA	NA	NA	NA	NA	NA	NA	NA
2020/06/22 6:01:22 PM GMT+1	Dog	Small (4-10kg)	8	4	Yes	To prevent fleas (or other pests)	No	NA	NexGard Spectra	NexGard Spectra	12	From a veterinary practice	NA	NA	NA	No	No	No	NA	No	NA	12	On a family member's bed	On a family member's bed	Every 2 weeks	Every day	Every 2 weeks	At the groomers	Never	1 hour	2 hours	Mainly on paved surfaces	Never	10	Bag and bin (specific dog poo bin)	Bag and bin (specific dog poo bin)	No	NA	NA	NA	NA	NA	NA	NA	NA	NA	NA	NA	NA
2020/06/22 6:01:37 PM GMT+1	Dog	Medium (10-20 kg)	11	3	Yes	To prevent fleas (or other pests)	Yes	Neem	Bob Martin Clear /Clear Plus (Fipronil)	Bob Martin Clear /Clear Plus (Fipronil)	4	From a petshop	Yes	Yes	Yes	Maybe	No	No	NA	Yes	April;May;June	4	In their own bed;On the furniture	In their own bed	Every month	Every day	Every 3 months	In a bath, sink or shower	Never	1 hour	3 hours	An equal mixture of the above	Yes, I walk my dog even if it is raining heavily and my dog gets completely wet	9	Bag and bin (specific dog poo bin);Bag and bin (home council bin)	Bag and bin (specific dog poo bin)	No	NA	NA	NA	NA	NA	NA	NA	NA	NA	NA	NA	NA
2020/06/22 6:01:49 PM GMT+1	Cat	NA	NA	NA	NA	NA	NA	NA	NA	NA	NA	NA	NA	NA	NA	NA	NA	NA	NA	NA	NA	NA	NA	NA	NA	NA	NA	NA	NA	NA	NA	NA	NA	NA	NA	NA	NA	Small (below 4kg)	3.5	11	Yes	Other reason	No	NA	Stronghold	Stronghold	1	From a veterinary practice	No
2020/06/22 6:02:34 PM GMT+1	Dog	Small (4-10kg)	9.5	5	Yes	To prevent fleas (or other pests)	No	NA	Bravecto tablet	Bravecto tablet	4	From a veterinary practice	NA	NA	NA	No	No	No	NA	No	NA	4	In their own bed;In a crate	In a crate	Every 2 weeks	Never	Every month	Outdoors	Never	2 hours	3 hours	Mainly on unpaved surfaces like field margins, forest tracks or the beach	Yes, I walk my dog even if it is raining heavily and my dog gets completely wet	10	Bag and bin (specific dog poo bin);Straight in a bin (of any kind)	Bag and bin (specific dog poo bin)	Yes	NA	NA	NA	NA	NA	NA	NA	NA	NA	NA	NA	NA
2020/06/22 6:04:02 PM GMT+1	Dog	Medium (10-20 kg)	14	11	No	NA	NA	NA	NA	NA	NA	NA	NA	NA	NA	NA	No	No	NA	No	NA	None	On a family member's bed	On a family member's bed	Every 2 weeks	Every day	Every 2 weeks	In a bath, sink or shower	Every week or more	2 hours	6 hours	Mainly on unpaved surfaces like field margins, forest tracks or the beach	Yes, I walk my dog even if it is raining heavily and my dog gets completely wet	10	Bag and bin (specific dog poo bin)	Bag and bin (specific dog poo bin)	No	NA	NA	NA	NA	NA	NA	NA	NA	NA	NA	NA	NA
2020/06/22 6:05:00 PM GMT+1	Dog	Medium (10-20 kg)	15	4	Yes	To prevent fleas (or other pests)	Yes	Billy No Mates	billy no mates	billy no mates	Don't know	Other type of shop - pharmacy/agricultural/equestrian/other	NA	NA	NA	No	No	No	NA	Yes	April;June	None	In their own bed;On the furniture;On a family member's bed	On the furniture	Every 2 weeks	Every day	Every month	In a bath, sink or shower	Every 3 months	2 hours	3 hours	Mainly on unpaved surfaces like field margins, forest tracks or the beach	Yes, I walk my dog even if it is raining heavily and my dog gets completely wet	10	Bag and bin (specific dog poo bin);Straight in a bin (of any kind)	Bag and bin (specific dog poo bin)	No	NA	NA	NA	NA	NA	NA	NA	NA	NA	NA	NA	NA
2020/06/22 6:05:16 PM GMT+1	Cat	NA	NA	NA	NA	NA	NA	NA	NA	NA	NA	NA	NA	NA	NA	NA	NA	NA	NA	NA	NA	NA	NA	NA	NA	NA	NA	NA	NA	NA	NA	NA	NA	NA	NA	NA	NA	Large (above 4 kg)	NA	3	Yes	To prevent fleas (or other pests)	No	NA	Advocate	Advocate	12	From a veterinary practice	Yes
2020/06/22 6:05:23 PM GMT+1	Cat	NA	NA	NA	NA	NA	NA	NA	NA	NA	NA	NA	NA	NA	NA	NA	NA	NA	NA	NA	NA	NA	NA	NA	NA	NA	NA	NA	NA	NA	NA	NA	NA	NA	NA	NA	NA	Small (below 4kg)	3	3	Yes	To prevent fleas (or other pests)	Yes	Advocate	Advocate	Advocate	12	From a veterinary practice	No
2020/06/22 6:05:55 PM GMT+1	Dog	Medium (10-20 kg)	NA	8	Yes	To prevent fleas (or other pests)	No	NA	Advantage	Advantage	3	From a veterinary practice	Yes	Yes	Yes	No	No	No	NA	No	NA	2	In their own bed	In their own bed	Every week or more	Every day	Never	At the groomers	Every week or more	2 hours	2 hours	An equal mixture of the above	Yes, I will walk my dog in light drizzle	10	Bag and bin (specific dog poo bin);Bag and bin (home council bin)	Bag and bin (specific dog poo bin)	No	NA	NA	NA	NA	NA	NA	NA	NA	NA	NA	NA	NA
2020/06/22 6:06:25 PM GMT+1	Dog	Medium (10-20 kg)	11	7	Yes	To prevent fleas (or other pests)	No	NA	Beaphar flea treatment	Beaphar flea treatment	5	Online	NA	Yes	Yes	No	No	Yes	June	Yes	June	None	On the furniture;On a family member's bed	On a family member's bed	Every week or more	Every day	Every 2 weeks	In a bath, sink or shower	Every 2 weeks	1 hour	6 hours	Mainly on unpaved surfaces like field margins, forest tracks or the beach	Yes, I walk my dog even if it is raining heavily and my dog gets completely wet	10	Bag and bin (specific dog poo bin);Bag and bin (home council bin);Straight in a bin (of any kind)	Bag and bin (home council bin)	No	NA	NA	NA	NA	NA	NA	NA	NA	NA	NA	NA	NA
2020/06/22 6:07:55 PM GMT+1	Dog	Large (20-40kg)	25	7	Yes	To prevent fleas (or other pests)	No	NA	Advantage	Advantage	2	Online	Yes	Yes	NA	No	Yes	Yes	July;August	No	NA	2	In their own bed;On the furniture;On a family member's bed;On the floor	On a family member's bed	Every 3 months	Every day	Once a year	In a bath, sink or shower	Once a year	2 hours	3 hours	An equal mixture of the above	Yes, I will walk my dog in light drizzle	10	Bag and bin (specific dog poo bin);Bag and bin (home council bin)	Bag and bin (specific dog poo bin)	No	NA	NA	NA	NA	NA	NA	NA	NA	NA	NA	NA	NA
2020/06/22 6:08:35 PM GMT+1	Dog	Small (4-10kg)	4.5	3	Yes	In response to other pests (eg ticks)	No	NA	Bravecto tablet	Bravecto tablet	2	From a veterinary practice	NA	NA	NA	No	No	No	NA	No	NA	4	In their own bed	On the furniture	Every 3 months	Every day	Every 6 months	Outdoors	Never	2 hours	3 hours	Mainly on unpaved surfaces like field margins, forest tracks or the beach	Occasionally, but I try to avoid this	9	Bag and bin (home council bin)	Bag and bin (home council bin)	No	NA	NA	NA	NA	NA	NA	NA	NA	NA	NA	NA	NA
2020/06/22 6:09:42 PM GMT+1	Dog	Large (20-40kg)	28	10	Yes	To prevent fleas (or other pests)	No	NA	Advocate	Advocate	2	From a veterinary practice	No	Yes	Yes	No	No	No	NA	No	NA	None	In their own bed;On the furniture	In their own bed	Every 2 weeks	Every 2 days	Every 3 months	At the groomers	Never	30 minutes	2 hours	An equal mixture of the above	Yes, I will walk my dog in light drizzle	10	Bag and bin (specific dog poo bin)	Bag and bin (home council bin)	No	NA	NA	NA	NA	NA	NA	NA	NA	NA	NA	NA	NA
2020/06/22 6:10:46 PM GMT+1	Cat	NA	NA	NA	NA	NA	NA	NA	NA	NA	NA	NA	NA	NA	NA	NA	NA	NA	NA	NA	NA	NA	NA	NA	NA	NA	NA	NA	NA	NA	NA	NA	NA	NA	NA	NA	NA	Small (below 4kg)	3	1	Yes	To prevent fleas (or other pests)	No	NA	Stronghold	Stronghold	4	From a veterinary practice	Yes
2020/06/22 6:10:54 PM GMT+1	Cat	NA	NA	NA	NA	NA	NA	NA	NA	NA	NA	NA	NA	NA	NA	NA	NA	NA	NA	NA	NA	NA	NA	NA	NA	NA	NA	NA	NA	NA	NA	NA	NA	NA	NA	NA	NA	Large (above 4 kg)	4.5	5	Yes	To prevent fleas (or other pests)	No	NA	Advantage	Advantage	6	Online	Yes
2020/06/22 6:11:01 PM GMT+1	Dog	Small (4-10kg)	5	5	Yes	To prevent fleas (or other pests)	No	NA	NexGard Spectra	NexGard Spectra	3	From a veterinary practice	NA	NA	NA	No	No	No	NA	No	NA	11	On a family member's bed	On a family member's bed	Every week or more	Every day	Less than once a year	In a bath, sink or shower	Never	30 minutes	3 hours	Mainly on unpaved surfaces like field margins, forest tracks or the beach	Yes, I will walk my dog in light drizzle	10	Bag and bin (specific dog poo bin);Bag and bin (home council bin)	Bag and bin (home council bin)	No	NA	NA	NA	NA	NA	NA	NA	NA	NA	NA	NA	NA
2020/06/22 6:11:04 PM GMT+1	Dog	Medium (10-20 kg)	12	2	No	NA	NA	NA	NA	NA	NA	NA	NA	NA	NA	NA	No	No	NA	No	NA	None	In their own bed	In their own bed	Every 3 months	Every day	Every 3 months	In a bath, sink or shower	Less than once a year	2 hours	3 hours	Mainly on unpaved surfaces like field margins, forest tracks or the beach	Yes, I walk my dog even if it is raining heavily and my dog gets completely wet	10	Bag and bin (specific dog poo bin);Bag and bin (home council bin);Bury in the ground	Bury in the ground	Yes	NA	NA	NA	NA	NA	NA	NA	NA	NA	NA	NA	NA
2020/06/22 6:12:05 PM GMT+1	Dog	Large (20-40kg)	33	9	Yes	To prevent fleas (or other pests)	No	NA	Simparica	Simparica	12	From a veterinary practice	NA	NA	NA	No	No	No	NA	No	NA	4	In their own bed	In their own bed	Every month	Every day	Less than once a year	NA	Every 2 weeks	1 hour	3 hours	An equal mixture of the above	Yes, I walk my dog even if it is raining heavily and my dog gets completely wet	10	Bag and bin (specific dog poo bin)	Bag and bin (specific dog poo bin)	No	NA	NA	NA	NA	NA	NA	NA	NA	NA	NA	NA	NA
2020/06/22 6:13:40 PM GMT+1	Dog	Large (20-40kg)	38	8	Yes	To prevent fleas (or other pests)	No	NA	Bravecto tablet	Bravecto tablet	4	From a veterinary practice	NA	NA	NA	No	No	No	NA	No	NA	4	In their own bed	In their own bed	Every month	Every day	Every week or more	Outdoors	Every week or more	2 hours	3 hours	An equal mixture of the above	Yes, I walk my dog even if it is raining heavily and my dog gets completely wet	10	Bag and bin (specific dog poo bin);Bag and bin (home council bin)	Bag and bin (specific dog poo bin)	No	NA	NA	NA	NA	NA	NA	NA	NA	NA	NA	NA	NA
2020/06/22 6:14:04 PM GMT+1	Dog	Small (4-10kg)	5	5	Yes	In response to a flea infestation	No	NA	Advocate;Advantage	Advantage	3	From a petshop	Yes	Yes	Yes	No	Yes	Yes	May;August;October	No	NA	2	On a family member's bed	On a family member's bed	Every month	Every day	Every 3 months	In a bath, sink or shower	Less than once a year	30 minutes	1 hour	An equal mixture of the above	Yes, I will walk my dog in light drizzle	9	Bag and bin (specific dog poo bin);Bag and bin (home council bin);Straight in a bin (of any kind)	Bag and bin (home council bin)	No	NA	NA	NA	NA	NA	NA	NA	NA	NA	NA	NA	NA
2020/06/22 6:14:08 PM GMT+1	Cat	NA	NA	NA	NA	NA	NA	NA	NA	NA	NA	NA	NA	NA	NA	NA	NA	NA	NA	NA	NA	NA	NA	NA	NA	NA	NA	NA	NA	NA	NA	NA	NA	NA	NA	NA	NA	Small (below 4kg)	3	10	Yes	To prevent fleas (or other pests)	No	NA	Advocate	Advocate	11	From a veterinary practice	Yes
2020/06/22 6:15:40 PM GMT+1	Dog	Large (20-40kg)	21	<1	Yes	To prevent fleas (or other pests)	No	NA	Frontline or Frontline Combo spot on	Frontline or Frontline Combo spot on	7	From a veterinary practice	Yes	Yes	Yes	No	No	No	NA	No	NA	3	In a crate	In a crate	Every month	Every day	Every 3 months	At the groomers	Every week or more	1 hour	3 hours	An equal mixture of the above	Yes, I walk my dog even if it is raining heavily and my dog gets completely wet	10	Bag and bin (specific dog poo bin);Bag and bin (home council bin);Straight in a bin (of any kind)	Straight in a bin (of any kind)	No	NA	NA	NA	NA	NA	NA	NA	NA	NA	NA	NA	NA
2020/06/22 6:18:11 PM GMT+1	Dog	Medium (10-20 kg)	14	9	No	NA	NA	NA	NA	NA	NA	NA	NA	NA	NA	NA	No	No	NA	Yes	March;April;May;June;July;August;September;October	None	In their own bed;On the furniture;On a family member's bed	In their own bed	Every week or more	Every day	Once a year	Outdoors	Every week or more	3 hours	6 hours	Mainly on unpaved surfaces like field margins, forest tracks or the beach	Yes, I walk my dog even if it is raining heavily and my dog gets completely wet	3	Bag and bin (home council bin)	Bag and bin (home council bin)	No	NA	NA	NA	NA	NA	NA	NA	NA	NA	NA	NA	NA
2020/06/22 6:18:57 PM GMT+1	Cat	NA	NA	NA	NA	NA	NA	NA	NA	NA	NA	NA	NA	NA	NA	NA	NA	NA	NA	NA	NA	NA	NA	NA	NA	NA	NA	NA	NA	NA	NA	NA	NA	NA	NA	NA	NA	Small (below 4kg)	NA	6	Yes	In response to a flea infestation	No	NA	Advocate;Bob Martin Clear / Clear Plus (Fipronil)	Advocate	6	From a veterinary practice	Yes
2020/06/22 6:19:24 PM GMT+1	Dog	Small (4-10kg)	7	2	Yes	In response to other pests (eg ticks)	No	NA	NexGard Spectra	NexGard Spectra	12	From a veterinary practice	NA	NA	NA	No	No	No	NA	No	NA	4	On a family member's bed	On a family member's bed	Every 2 weeks	Every day	Every 2 weeks	In a bath, sink or shower	Every 6 months	1 hour	6 hours	Mainly on unpaved surfaces like field margins, forest tracks or the beach	Yes, I walk my dog even if it is raining heavily and my dog gets completely wet	10	Bag and bin (specific dog poo bin);Bag and bin (home council bin)	Bag and bin (specific dog poo bin)	No	NA	NA	NA	NA	NA	NA	NA	NA	NA	NA	NA	NA
2020/06/22 6:19:26 PM GMT+1	Cat	NA	NA	NA	NA	NA	NA	NA	NA	NA	NA	NA	NA	NA	NA	NA	NA	NA	NA	NA	NA	NA	NA	NA	NA	NA	NA	NA	NA	NA	NA	NA	NA	NA	NA	NA	NA	Large (above 4 kg)	4.6	14	No	NA	NA	NA	NA	NA	NA	NA	NA
2020/06/22 6:20:34 PM GMT+1	Dog	Medium (10-20 kg)	18	4	Yes	To prevent fleas (or other pests)	Yes	Apple cider vinegar	Advocate	Advocate	1	From a veterinary practice	No	Yes	Yes	No	No	No	NA	No	NA	2	In their own bed;On the furniture	On the furniture	Every 3 months	Every 2 days	Every month	In a bath, sink or shower	Every week or more	2 hours	6 hours	An equal mixture of the above	Yes, I walk my dog even if it is raining heavily and my dog gets completely wet	10	Bag and bin (home council bin)	Bag and bin (home council bin)	No	NA	NA	NA	NA	NA	NA	NA	NA	NA	NA	NA	NA
2020/06/22 6:21:40 PM GMT+1	Dog	Large (20-40kg)	33	7	Yes	To prevent fleas (or other pests)	No	NA	Frontline generic	Frontline generic	6	Online	Don't know	Yes	Yes	No	No	Don't know	NA	No	NA	6	In their own bed	In their own bed	Every week or more	Every day	Every month	At the groomers	Never	2 hours	6 hours	Mainly on unpaved surfaces like field margins, forest tracks or the beach	Yes, I will walk my dog in light drizzle	10	Bag and bin (specific dog poo bin)	Bag and bin (specific dog poo bin)	No	NA	NA	NA	NA	NA	NA	NA	NA	NA	NA	NA	NA
2020/06/22 6:22:08 PM GMT+1	Dog	Small (4-10kg)	9.4	5	Yes	To prevent fleas (or other pests)	Yes	NA	Advocate;NexGard Spectra;Seresto collar	NexGard Spectra	12	From a veterinary practice	NA	NA	NA	Yes	No	No	NA	Yes	March;April;May;June	None	In their own bed;On a family member's bed;In a crate	In their own bed	Every 2 weeks	Every day	Every week or more	In a bath, sink or shower	Every week or more	2 hours	6 hours	Mainly on unpaved surfaces like field margins, forest tracks or the beach	Yes, I walk my dog even if it is raining heavily and my dog gets completely wet	10	Bag and bin (specific dog poo bin);Bag and bin (home council bin)	Bag and bin (specific dog poo bin)	No	NA	NA	NA	NA	NA	NA	NA	NA	NA	NA	NA	NA
2020/06/22 6:22:43 PM GMT+1	Cat	NA	NA	NA	NA	NA	NA	NA	NA	NA	NA	NA	NA	NA	NA	NA	NA	NA	NA	NA	NA	NA	NA	NA	NA	NA	NA	NA	NA	NA	NA	NA	NA	NA	NA	NA	NA	Small (below 4kg)	3	1	Yes	To prevent fleas (or other pests)	No	NA	Frontline or Frontline Combo	Frontline or Frontline Combo	10	From a petshop	No
2020/06/22 6:23:06 PM GMT+1	Dog	Medium (10-20 kg)	19	4	Yes	To prevent fleas (or other pests)	Yes	Billy no mates	Billy no mates, no chemicals used	Billy no mates	Don't know	Online	NA	NA	NA	No	No	No	NA	Yes	June	None	On a family member's bed	On a family member's bed	Every 3 months	Every day	Every month	Outdoors	Every 2 weeks	2 hours	3 hours	An equal mixture of the above	Yes, I walk my dog even if it is raining heavily and my dog gets completely wet	10	Bag and bin (specific dog poo bin)	Bag and bin (specific dog poo bin)	No	NA	NA	NA	NA	NA	NA	NA	NA	NA	NA	NA	NA
2020/06/22 6:23:21 PM GMT+1	Dog	Large (20-40kg)	27	6	Yes	To prevent fleas (or other pests)	No	NA	Advantage	Advantage	12	From a petshop	Yes	Yes	Yes	No	No	No	NA	No	NA	None	In their own bed;On the furniture;On a family member's bed;On the floor	In their own bed	Every 3 months	Every day	Every month	In a bath, sink or shower	Every week or more	1 hour	2 hours	An equal mixture of the above	Yes, I will walk my dog in light drizzle	8	Bag and bin (specific dog poo bin);Bag and bin (home council bin);Straight in a bin (of any kind);Flush down the toilet	Bag and bin (specific dog poo bin)	No	NA	NA	NA	NA	NA	NA	NA	NA	NA	NA	NA	NA
2020/06/22 6:23:59 PM GMT+1	Dog	Medium (10-20 kg)	14	14	No	NA	NA	NA	NA	NA	NA	NA	NA	NA	NA	NA	No	No	NA	No	NA	1	In their own bed;On the furniture;On a family member's bed	On the furniture	Every week or more	Every day	Every 3 months	In a bath, sink or shower	Less than once a year	2 hours	6 hours	An equal mixture of the above	Yes, I walk my dog even if it is raining heavily and my dog gets completely wet	10	Bag and bin (home council bin)	Bag and bin (home council bin)	No	NA	NA	NA	NA	NA	NA	NA	NA	NA	NA	NA	NA
2020/06/22 6:28:39 PM GMT+1	Dog	Large (20-40kg)	35	10	Yes	To prevent fleas (or other pests)	No	NA	Bravecto tablet	Bravecto tablet	3	From a veterinary practice	NA	NA	NA	No	No	No	NA	Yes	May	4	In their own bed;On the furniture;On a family member's bed;On the floor	On the furniture	Don't know	Every day	Every 3 months	At the groomers	Every 3 months	2 hours	3 hours	An equal mixture of the above	Yes, I walk my dog even if it is raining heavily and my dog gets completely wet	10	Bag and bin (specific dog poo bin);Bag and bin (home council bin);Straight in a bin (of any kind)	Bag and bin (specific dog poo bin)	No	NA	NA	NA	NA	NA	NA	NA	NA	NA	NA	NA	NA
2020/06/22 6:29:34 PM GMT+1	Dog	Small (4-10kg)	9	4	Yes	To prevent fleas (or other pests)	No	NA	Seresto collar	Seresto collar	2	From a veterinary practice	NA	NA	NA	No	No	No	NA	No	NA	12	In their own bed;On the floor	On the floor	Every 3 months	Every week	Every week or more	Outdoors	Every week or more	1 hour	2 hours	Mainly on unpaved surfaces like field margins, forest tracks or the beach	Yes, I walk my dog even if it is raining heavily and my dog gets completely wet	8	Bag and bin (specific dog poo bin);Bag and bin (home council bin)	Bag and bin (specific dog poo bin)	No	NA	NA	NA	NA	NA	NA	NA	NA	NA	NA	NA	NA
2020/06/22 6:30:32 PM GMT+1	Dog	Large (20-40kg)	NA	6	Yes	In response to a flea infestation	No	NA	Don't know	Don't know	1	From a veterinary practice	Yes	Yes	Yes	No	Yes	Yes	August	No	NA	2	On the furniture	On the furniture	Every month	Every day	Every 6 months	In a bath, sink or shower	Every week or more	3 hours	6 hours	Mainly on unpaved surfaces like field margins, forest tracks or the beach	Yes, I walk my dog even if it is raining heavily and my dog gets completely wet	1	Bag and bin (specific dog poo bin)	Bag and bin (specific dog poo bin)	Yes	NA	NA	NA	NA	NA	NA	NA	NA	NA	NA	NA	NA
2020/06/22 6:31:51 PM GMT+1	Dog	Large (20-40kg)	25	2	Yes	To prevent fleas (or other pests)	No	NA	Advocate	Advocate	11	From a veterinary practice	No	Yes	Yes	No	No	No	NA	No	NA	2	In their own bed;On the furniture;On the floor	On the furniture	Every week or more	Every day	Every week or more	In a bath, sink or shower	Every week or more	2 hours	3 hours	An equal mixture of the above	Yes, I walk my dog even if it is raining heavily and my dog gets completely wet	10	Bag and bin (specific dog poo bin);Bag and bin (home council bin)	Bag and bin (specific dog poo bin)	No	NA	NA	NA	NA	NA	NA	NA	NA	NA	NA	NA	NA
2020/06/22 6:33:33 PM GMT+1	Dog	Medium (10-20 kg)	20	11	Yes	To prevent fleas (or other pests)	No	NA	NexGard Spectra	NexGard Spectra	12	From a veterinary practice	NA	NA	NA	No	No	No	NA	No	NA	4	In their own bed	In their own bed	Every month	Every day	Every week or more	Outdoors	Every 2 weeks	1 hour	6 hours	Mainly on unpaved surfaces like field margins, forest tracks or the beach	Yes, I walk my dog even if it is raining heavily and my dog gets completely wet	7	Bag and bin (specific dog poo bin);Bag and bin (home council bin);Straight in a bin (of any kind)	Bag and bin (specific dog poo bin)	No	NA	NA	NA	NA	NA	NA	NA	NA	NA	NA	NA	NA
2020/06/22 6:37:32 PM GMT+1	Dog	Large (20-40kg)	30	3	Yes	To prevent fleas (or other pests)	No	NA	Advocate;Frontline or Frontline Combo spot on;NexGard	Advocate	4	From a petshop	Yes	Yes	Yes	No	No	No	NA	No	NA	3	On the furniture;On a family member's bed;On the floor	On the furniture	Every week or more	Every day	Every month	At the groomers	Every month	1 hour	1 hour	Mainly on paved surfaces	Yes, I will walk my dog in light drizzle	10	Bag and bin (home council bin)	Bag and bin (home council bin)	No	NA	NA	NA	NA	NA	NA	NA	NA	NA	NA	NA	NA
2020/06/22 6:37:49 PM GMT+1	Cat	NA	NA	NA	NA	NA	NA	NA	NA	NA	NA	NA	NA	NA	NA	NA	NA	NA	NA	NA	NA	NA	NA	NA	NA	NA	NA	NA	NA	NA	NA	NA	NA	NA	NA	NA	NA	Large (above 4 kg)	4.3	3	Yes	In response to a flea infestation	No	NA	Advocate;Credelio;Stronghold Plus	Credelio	4	From a veterinary practice	Yes
2020/06/22 6:38:11 PM GMT+1	Cat	NA	NA	NA	NA	NA	NA	NA	NA	NA	NA	NA	NA	NA	NA	NA	NA	NA	NA	NA	NA	NA	NA	NA	NA	NA	NA	NA	NA	NA	NA	NA	NA	NA	NA	NA	NA	Large (above 4 kg)	NA	1	Yes	To prevent fleas (or other pests)	No	NA	Advocate	Advocate	12	From a veterinary practice	Yes
2020/06/22 6:38:21 PM GMT+1	Dog	Small (4-10kg)	8	9	Yes	To prevent fleas (or other pests)	No	NA	NexGard Spectra	NexGard Spectra	12	From a veterinary practice	NA	NA	NA	No	No	No	NA	No	NA	12	In their own bed;On the furniture;On a family member's bed	In their own bed	Every month	Every day	Every month	In a bath, sink or shower	Less than once a year	1 hour	2 hours	An equal mixture of the above	Yes, I will walk my dog in light drizzle	10	Bag and bin (specific dog poo bin);Bag and bin (home council bin);Straight in a bin (of any kind)	Bag and bin (specific dog poo bin)	No	NA	NA	NA	NA	NA	NA	NA	NA	NA	NA	NA	NA
2020/06/22 6:38:23 PM GMT+1	Cat	NA	NA	NA	NA	NA	NA	NA	NA	NA	NA	NA	NA	NA	NA	NA	NA	NA	NA	NA	NA	NA	NA	NA	NA	NA	NA	NA	NA	NA	NA	NA	NA	NA	NA	NA	NA	Small (below 4kg)	NA	10	Yes	To prevent fleas (or other pests)	Yes	clove oil diluted in olive oil dabbed at the back of the neck	homemade clove oil diluted in olive oil	homemade as above	2	None of the above	Yes
2020/06/22 6:38:36 PM GMT+1	Cat	NA	NA	NA	NA	NA	NA	NA	NA	NA	NA	NA	NA	NA	NA	NA	NA	NA	NA	NA	NA	NA	NA	NA	NA	NA	NA	NA	NA	NA	NA	NA	NA	NA	NA	NA	NA	Large (above 4 kg)	4.7	13	Yes	To prevent fleas (or other pests)	No	NA	Endectrid;Stronghold	Stronghold	12	From a veterinary practice	No
2020/06/22 6:40:11 PM GMT+1	Cat	NA	NA	NA	NA	NA	NA	NA	NA	NA	NA	NA	NA	NA	NA	NA	NA	NA	NA	NA	NA	NA	NA	NA	NA	NA	NA	NA	NA	NA	NA	NA	NA	NA	NA	NA	NA	Large (above 4 kg)	5	3	Yes	To prevent fleas (or other pests)	No	NA	Frontline or Frontline Combo	Frontline or Frontline Combo	12	From a petshop	Yes
2020/06/22 6:40:32 PM GMT+1	Dog	Large (20-40kg)	28	4	No	NA	NA	NA	NA	NA	NA	NA	NA	NA	NA	NA	No	No	NA	No	NA	1	In their own bed;On the furniture;On the floor	On the floor	Every week or more	Every day	Every month	In a bath, sink or shower	Never	Don't know	3 hours	NA	NA	10	Bag and bin (specific dog poo bin);Bag and bin (home council bin)	Bag and bin (home council bin)	No	NA	NA	NA	NA	NA	NA	NA	NA	NA	NA	NA	NA
2020/06/22 6:40:52 PM GMT+1	Cat	NA	NA	NA	NA	NA	NA	NA	NA	NA	NA	NA	NA	NA	NA	NA	NA	NA	NA	NA	NA	NA	NA	NA	NA	NA	NA	NA	NA	NA	NA	NA	NA	NA	NA	NA	NA	Small (below 4kg)	3.6	8	Yes	To prevent fleas (or other pests)	No	NA	Advantage;Bravecto	Bravecto	2	From a veterinary practice	Yes
2020/06/22 6:41:10 PM GMT+1	Cat	NA	NA	NA	NA	NA	NA	NA	NA	NA	NA	NA	NA	NA	NA	NA	NA	NA	NA	NA	NA	NA	NA	NA	NA	NA	NA	NA	NA	NA	NA	NA	NA	NA	NA	NA	NA	Large (above 4 kg)	4	14	Yes	Other reason	No	NA	Advantage	Advantage	4	Online	Yes
2020/06/22 6:43:33 PM GMT+1	Cat	NA	NA	NA	NA	NA	NA	NA	NA	NA	NA	NA	NA	NA	NA	NA	NA	NA	NA	NA	NA	NA	NA	NA	NA	NA	NA	NA	NA	NA	NA	NA	NA	NA	NA	NA	NA	Large (above 4 kg)	4.5	15	Yes	To prevent fleas (or other pests)	No	NA	Stronghold	Stronghold	4	From a veterinary practice	Yes
2020/06/22 6:43:33 PM GMT+1	Dog	Large (20-40kg)	25	2	Yes	To prevent fleas (or other pests)	No	NA	Bravecto tablet	Bravecto tablet	4	From a veterinary practice	NA	NA	NA	No	No	No	NA	No	NA	4	In their own bed;On a family member's bed;On the floor	In their own bed	Every 3 months	Every day	Every month	In a bath, sink or shower	Never	3 hours	3 hours	An equal mixture of the above	Yes, I will walk my dog in light drizzle	10	Bag and bin (specific dog poo bin)	Bag and bin (specific dog poo bin)	No	NA	NA	NA	NA	NA	NA	NA	NA	NA	NA	NA	NA
2020/06/22 6:44:02 PM GMT+1	Cat	NA	NA	NA	NA	NA	NA	NA	NA	NA	NA	NA	NA	NA	NA	NA	NA	NA	NA	NA	NA	NA	NA	NA	NA	NA	NA	NA	NA	NA	NA	NA	NA	NA	NA	NA	NA	Large (above 4 kg)	5	11	Yes	To prevent fleas (or other pests)	No	NA	Stronghold	Stronghold	12	From a veterinary practice	Yes
2020/06/22 6:45:37 PM GMT+1	Dog	Medium (10-20 kg)	10.5	4	Yes	To prevent fleas (or other pests)	Yes	wild wash spray	Advocate;Seresto collar	Advocate	12	From a veterinary practice	Yes	Yes	Yes	No	No	No	NA	Yes	March;April;May	2	In their own bed;On the furniture;On a family member's bed;On the floor	On a family member's bed	Every month	Every day	Every month	In a bath, sink or shower	Every 2 weeks	2 hours	6 hours	Mainly on unpaved surfaces like field margins, forest tracks or the beach	Yes, I walk my dog even if it is raining heavily and my dog gets completely wet	10	Bag and bin (specific dog poo bin);Bag and bin (home council bin)	Bag and bin (specific dog poo bin)	Yes	NA	NA	NA	NA	NA	NA	NA	NA	NA	NA	NA	NA
2020/06/22 6:46:52 PM GMT+1	Cat	NA	NA	NA	NA	NA	NA	NA	NA	NA	NA	NA	NA	NA	NA	NA	NA	NA	NA	NA	NA	NA	NA	NA	NA	NA	NA	NA	NA	NA	NA	NA	NA	NA	NA	NA	NA	Large (above 4 kg)	5.8	14	Yes	In response to a flea infestation	No	NA	Comfortis;Credelio	Comfortis	3	From a veterinary practice	NA
2020/06/22 6:47:23 PM GMT+1	Cat	NA	NA	NA	NA	NA	NA	NA	NA	NA	NA	NA	NA	NA	NA	NA	NA	NA	NA	NA	NA	NA	NA	NA	NA	NA	NA	NA	NA	NA	NA	NA	NA	NA	NA	NA	NA	Small (below 4kg)	3.8	2	Yes	To prevent fleas (or other pests)	No	NA	Bravecto	Bravecto	3	From a veterinary practice	Yes
2020/06/22 6:50:16 PM GMT+1	Cat	NA	NA	NA	NA	NA	NA	NA	NA	NA	NA	NA	NA	NA	NA	NA	NA	NA	NA	NA	NA	NA	NA	NA	NA	NA	NA	NA	NA	NA	NA	NA	NA	NA	NA	NA	NA	Small (below 4kg)	3.65	5	Yes	To prevent fleas (or other pests)	No	NA	Stronghold	Stronghold	11	From a veterinary practice	Yes
2020/06/22 6:50:30 PM GMT+1	Dog	Small (4-10kg)	8.5	6	Yes	To prevent fleas (or other pests)	No	NA	Bravecto spot on	Bravecto spot on	2	From a veterinary practice	Don't know	Yes	Yes	No	No	No	NA	No	NA	3	On a family member's bed	On a family member's bed	Every 2 weeks	Every day	Every month	At the groomers	Never	1 hour	2 hours	An equal mixture of the above	Yes, I will walk my dog in light drizzle	10	Bag and bin (specific dog poo bin);Bag and bin (home council bin);Straight in a bin (of any kind)	Straight in a bin (of any kind)	No	NA	NA	NA	NA	NA	NA	NA	NA	NA	NA	NA	NA
2020/06/22 6:51:30 PM GMT+1	Dog	Large (20-40kg)	37	11	Yes	To prevent fleas (or other pests)	Yes	Cooper and Gracie	Only natural	Only natural	4	Online	NA	NA	NA	No	No	No	NA	No	NA	3	In their own bed	In their own bed	Every 2 weeks	Every month	Every month	In a bath, sink or shower	Every month	2 hours	6 hours	An equal mixture of the above	Yes, I walk my dog even if it is raining heavily and my dog gets completely wet	10	Bag and bin (home council bin)	Bag and bin (home council bin)	No	NA	NA	NA	NA	NA	NA	NA	NA	NA	NA	NA	NA
2020/06/22 6:52:42 PM GMT+1	Cat	NA	NA	NA	NA	NA	NA	NA	NA	NA	NA	NA	NA	NA	NA	NA	NA	NA	NA	NA	NA	NA	NA	NA	NA	NA	NA	NA	NA	NA	NA	NA	NA	NA	NA	NA	NA	Small (below 4kg)	4	14	Yes	To prevent fleas (or other pests)	No	NA	Stronghold	Stronghold	12	From a veterinary practice	Yes
2020/06/22 6:54:35 PM GMT+1	Dog	Medium (10-20 kg)	11	10	Yes	To prevent fleas (or other pests)	No	NA	Don't know	Don't know	1	From a veterinary practice	No	Yes	Yes	No	No	No	NA	No	NA	None	In their own bed;On the furniture;On a family member's bed	In their own bed	Every week or more	Every week	Every week or more	In a bath, sink or shower	Never	2 hours	2 hours	An equal mixture of the above	Yes, I walk my dog even if it is raining heavily and my dog gets completely wet	10	Bag and bin (specific dog poo bin);Bury in the ground	Bag and bin (specific dog poo bin)	No	NA	NA	NA	NA	NA	NA	NA	NA	NA	NA	NA	NA
2020/06/22 6:59:18 PM GMT+1	Cat	NA	NA	NA	NA	NA	NA	NA	NA	NA	NA	NA	NA	NA	NA	NA	NA	NA	NA	NA	NA	NA	NA	NA	NA	NA	NA	NA	NA	NA	NA	NA	NA	NA	NA	NA	NA	Large (above 4 kg)	NA	5	Yes	To prevent fleas (or other pests)	Don't know	NA	Itch - flea	Itch - flea	12	Online	Yes
2020/06/22 6:59:18 PM GMT+1	Cat	NA	NA	NA	NA	NA	NA	NA	NA	NA	NA	NA	NA	NA	NA	NA	NA	NA	NA	NA	NA	NA	NA	NA	NA	NA	NA	NA	NA	NA	NA	NA	NA	NA	NA	NA	NA	Large (above 4 kg)	5.5	5	Yes	To prevent fleas (or other pests)	No	NA	Advantage;Bravecto;Broadline;Effipro Spot On	Broadline	4	From a veterinary practice	No
2020/06/22 7:00:14 PM GMT+1	Cat	NA	NA	NA	NA	NA	NA	NA	NA	NA	NA	NA	NA	NA	NA	NA	NA	NA	NA	NA	NA	NA	NA	NA	NA	NA	NA	NA	NA	NA	NA	NA	NA	NA	NA	NA	NA	Small (below 4kg)	3	6	No	NA	NA	NA	NA	NA	NA	NA	NA
2020/06/22 7:00:30 PM GMT+1	Dog	Large (20-40kg)	31	8	Yes	To prevent fleas (or other pests)	No	NA	Bravecto tablet	Bravecto tablet	3	From a veterinary practice	NA	NA	NA	No	No	No	NA	No	NA	3	In their own bed;On the furniture;On the floor	In their own bed	Every 3 months	Every day	Every 3 months	Outdoors	Every 2 weeks	2 hours	6 hours	An equal mixture of the above	Yes, I walk my dog even if it is raining heavily and my dog gets completely wet	10	Bag and bin (specific dog poo bin)	Bag and bin (specific dog poo bin)	No	NA	NA	NA	NA	NA	NA	NA	NA	NA	NA	NA	NA
2020/06/22 7:00:38 PM GMT+1	Dog	Medium (10-20 kg)	11	3	No	NA	NA	NA	NA	NA	NA	NA	NA	NA	NA	NA	No	No	NA	No	NA	None	In their own bed;On the furniture;On a family member's bed;On the floor	On a family member's bed	Never	Every day	Every 6 months	At the groomers	Once a year	1 hour	2 hours	An equal mixture of the above	Yes, I will walk my dog in light drizzle	10	Bag and bin (specific dog poo bin);Bag and bin (home council bin);Straight in a bin (of any kind)	Bag and bin (specific dog poo bin)	No	NA	NA	NA	NA	NA	NA	NA	NA	NA	NA	NA	NA
2020/06/22 7:02:34 PM GMT+1	Cat	NA	NA	NA	NA	NA	NA	NA	NA	NA	NA	NA	NA	NA	NA	NA	NA	NA	NA	NA	NA	NA	NA	NA	NA	NA	NA	NA	NA	NA	NA	NA	NA	NA	NA	NA	NA	Small (below 4kg)	3.8	4	No	NA	NA	NA	NA	NA	NA	NA	NA
2020/06/22 7:03:07 PM GMT+1	Cat	NA	NA	NA	NA	NA	NA	NA	NA	NA	NA	NA	NA	NA	NA	NA	NA	NA	NA	NA	NA	NA	NA	NA	NA	NA	NA	NA	NA	NA	NA	NA	NA	NA	NA	NA	NA	Large (above 4 kg)	4.9	11	Yes	To prevent fleas (or other pests)	No	NA	Stronghold	Stronghold	12	From a veterinary practice	No
2020/06/22 7:05:06 PM GMT+1	Dog	Medium (10-20 kg)	NA	4	Yes	To prevent fleas (or other pests)	Yes	NA	Frontline generic	Frontline generic	2	From a petshop	No	Yes	No	No	No	No	NA	No	NA	1	In their own bed	In their own bed	Every week or more	Every day	Every 6 months	Outdoors	Once a year	1 hour	1 hour	An equal mixture of the above	Yes, I walk my dog even if it is raining heavily and my dog gets completely wet	10	Bag and bin (specific dog poo bin);Bag and bin (home council bin)	Bag and bin (home council bin)	No	NA	NA	NA	NA	NA	NA	NA	NA	NA	NA	NA	NA
2020/06/22 7:06:19 PM GMT+1	Cat	NA	NA	NA	NA	NA	NA	NA	NA	NA	NA	NA	NA	NA	NA	NA	NA	NA	NA	NA	NA	NA	NA	NA	NA	NA	NA	NA	NA	NA	NA	NA	NA	NA	NA	NA	NA	Large (above 4 kg)	5.5	5	Yes	To prevent fleas (or other pests)	No	NA	Activyl	Activyl	4	From a veterinary practice	No
2020/06/22 7:07:42 PM GMT+1	Dog	Large (20-40kg)	28	9	Yes	To prevent fleas (or other pests)	No	NA	Bravecto tablet	Bravecto tablet	2	From a veterinary practice	NA	NA	NA	No	No	No	NA	No	NA	2	In their own bed;On the furniture;On the floor	On the furniture	Every 2 weeks	Every day	Every 6 months	In a bath, sink or shower	Every week or more	2 hours	3 hours	Mainly on unpaved surfaces like field margins, forest tracks or the beach	Yes, I will walk my dog in light drizzle	10	Bag and bin (specific dog poo bin);Flush down the toilet	Bag and bin (specific dog poo bin)	No	NA	NA	NA	NA	NA	NA	NA	NA	NA	NA	NA	NA
2020/06/22 7:09:06 PM GMT+1	Cat	NA	NA	NA	NA	NA	NA	NA	NA	NA	NA	NA	NA	NA	NA	NA	NA	NA	NA	NA	NA	NA	NA	NA	NA	NA	NA	NA	NA	NA	NA	NA	NA	NA	NA	NA	NA	Large (above 4 kg)	4.5	4	Yes	To prevent fleas (or other pests)	No	NA	Credelio	Credelio	12	From a veterinary practice	No
2020/06/22 7:09:13 PM GMT+1	Dog	Small (4-10kg)	9	4	No	NA	NA	NA	NA	NA	NA	NA	NA	NA	NA	NA	No	No	NA	Yes	May;June	None	In their own bed;On the furniture;On a family member's bed	On the furniture	Once a year	Every day	Never	NA	Every month	2 hours	3 hours	Mainly on unpaved surfaces like field margins, forest tracks or the beach	Occasionally, but I try to avoid this	10	Bag and bin (specific dog poo bin);Bag and bin (home council bin)	Bag and bin (home council bin)	No	NA	NA	NA	NA	NA	NA	NA	NA	NA	NA	NA	NA
2020/06/22 7:10:26 PM GMT+1	Cat	NA	NA	NA	NA	NA	NA	NA	NA	NA	NA	NA	NA	NA	NA	NA	NA	NA	NA	NA	NA	NA	NA	NA	NA	NA	NA	NA	NA	NA	NA	NA	NA	NA	NA	NA	NA	Large (above 4 kg)	6.4	3	Yes	To prevent fleas (or other pests)	No	NA	Advantage	Advantage	6	Online	No
2020/06/22 7:11:08 PM GMT+1	Dog	Medium (10-20 kg)	20	6	Yes	To prevent fleas (or other pests)	No	NA	Bravecto tablet	Bravecto tablet	12	From a veterinary practice	No	Yes	Yes	No	No	No	NA	No	NA	12	On the furniture;On a family member's bed	On a family member's bed	Every 2 weeks	Every day	Every month	At the groomers	Every week or more	2 hours	2 hours	Mainly on unpaved surfaces like field margins, forest tracks or the beach	Yes, I walk my dog even if it is raining heavily and my dog gets completely wet	10	Bag and bin (specific dog poo bin)	Bag and bin (specific dog poo bin)	No	NA	NA	NA	NA	NA	NA	NA	NA	NA	NA	NA	NA
2020/06/22 7:11:38 PM GMT+1	Dog	Extra large (over 40 kg)	41	7	Yes	To prevent fleas (or other pests)	No	NA	Frontline or Frontline Combo spot on	Frontline or Frontline Combo spot on	5	From a veterinary practice	Don't know	NA	Yes	No	No	No	NA	Yes	May;June	None	On the furniture	On the furniture	Every month	Every day	Every month	Outdoors	Every month	1 hour	1 hour	Mainly on unpaved surfaces like field margins, forest tracks or the beach	Yes, I will walk my dog in light drizzle	10	Bag and bin (home council bin)	Bag and bin (home council bin)	No	NA	NA	NA	NA	NA	NA	NA	NA	NA	NA	NA	NA
2020/06/22 7:12:08 PM GMT+1	Cat	NA	NA	NA	NA	NA	NA	NA	NA	NA	NA	NA	NA	NA	NA	NA	NA	NA	NA	NA	NA	NA	NA	NA	NA	NA	NA	NA	NA	NA	NA	NA	NA	NA	NA	NA	NA	Large (above 4 kg)	6	5	Yes	In response to a flea infestation	No	NA	Frontline or Frontline Combo	Frontline or Frontline Combo	1	From a petshop	Yes
2020/06/22 7:12:16 PM GMT+1	Dog	Large (20-40kg)	32	13	Yes	To prevent fleas (or other pests)	No	NA	Advocate	Advocate	1	From a veterinary practice	Yes	No	NA	No	No	No	NA	No	NA	1	On the floor	On the floor	Every 3 months	Never	Less than once a year	NA	Never	2 hours	2 hours	Mainly on unpaved surfaces like field margins, forest tracks or the beach	Yes, I walk my dog even if it is raining heavily and my dog gets completely wet	10	Bag and bin (specific dog poo bin);Bag and bin (home council bin)	Bag and bin (specific dog poo bin)	No	NA	NA	NA	NA	NA	NA	NA	NA	NA	NA	NA	NA
2020/06/22 7:12:38 PM GMT+1	Dog	Large (20-40kg)	27	12	No	NA	NA	NA	NA	NA	NA	NA	NA	NA	NA	NA	No	No	NA	No	NA	None	In their own bed;On the furniture;On the floor	In their own bed	Once a year	Every 2 days	Every 3 months	In a bath, sink or shower	Every 2 weeks	1 hour	2 hours	Mainly on unpaved surfaces like field margins, forest tracks or the beach	Never	10	Bag and bin (specific dog poo bin);Bag and bin (home council bin)	Bag and bin (home council bin)	No	NA	NA	NA	NA	NA	NA	NA	NA	NA	NA	NA	NA
2020/06/22 7:14:09 PM GMT+1	Dog	Small (4-10kg)	7.4	3	Yes	To prevent fleas (or other pests)	No	NA	Endectrid;Seresto collar	Endectrid	12	From a veterinary practice	Yes	Yes	Yes	No	No	No	NA	No	NA	12	In their own bed;In a crate	In a crate	Every month	Every day	Every 2 weeks	In a bath, sink or shower	Never	1 hour	2 hours	An equal mixture of the above	Yes, I will walk my dog in light drizzle	10	Bag and bin (specific dog poo bin);Bag and bin (home council bin)	Bag and bin (home council bin)	No	NA	NA	NA	NA	NA	NA	NA	NA	NA	NA	NA	NA
2020/06/22 7:14:28 PM GMT+1	Dog	Small (4-10kg)	6	8	Yes	To prevent fleas (or other pests)	No	NA	Advocate;Bravecto tablet;NexGard Spectra	Advocate	6	Online	Yes	Yes	Yes	No	No	No	NA	No	NA	4	In their own bed;On the furniture;In a crate	In a crate	Every month	Every day	Every 3 months	In a bath, sink or shower	Never	30 minutes	6 hours	Mainly on unpaved surfaces like field margins, forest tracks or the beach	Occasionally, but I try to avoid this	10	Bag and bin (home council bin)	Bag and bin (home council bin)	No	NA	NA	NA	NA	NA	NA	NA	NA	NA	NA	NA	NA
2020/06/22 7:14:42 PM GMT+1	Dog	Large (20-40kg)	38	3	Yes	To prevent fleas (or other pests)	No	NA	NexGard Spectra;Simparica	NexGard Spectra	6	From a veterinary practice	NA	NA	NA	No	No	No	NA	No	NA	3	In their own bed;On the furniture;On a family member's bed;On the floor	On the furniture	Every month	Every day	Every 3 months	At the groomers	Every 6 months	2 hours	6 hours	Mainly on unpaved surfaces like field margins, forest tracks or the beach	Yes, I walk my dog even if it is raining heavily and my dog gets completely wet	10	Bag and bin (specific dog poo bin);Bag and bin (home council bin)	Bag and bin (specific dog poo bin)	No	NA	NA	NA	NA	NA	NA	NA	NA	NA	NA	NA	NA
2020/06/22 7:15:45 PM GMT+1	Cat	NA	NA	NA	NA	NA	NA	NA	NA	NA	NA	NA	NA	NA	NA	NA	NA	NA	NA	NA	NA	NA	NA	NA	NA	NA	NA	NA	NA	NA	NA	NA	NA	NA	NA	NA	NA	Large (above 4 kg)	6	7	Yes	To prevent fleas (or other pests)	No	NA	Credelio	Credelio	2	From a veterinary practice	NA
2020/06/22 7:16:09 PM GMT+1	Cat	NA	NA	NA	NA	NA	NA	NA	NA	NA	NA	NA	NA	NA	NA	NA	NA	NA	NA	NA	NA	NA	NA	NA	NA	NA	NA	NA	NA	NA	NA	NA	NA	NA	NA	NA	NA	Large (above 4 kg)	4.6	11	Yes	To prevent fleas (or other pests)	No	NA	Don't know	Don't know	1	From a veterinary practice	NA
2020/06/22 7:18:21 PM GMT+1	Cat	NA	NA	NA	NA	NA	NA	NA	NA	NA	NA	NA	NA	NA	NA	NA	NA	NA	NA	NA	NA	NA	NA	NA	NA	NA	NA	NA	NA	NA	NA	NA	NA	NA	NA	NA	NA	Large (above 4 kg)	5.5	4	Yes	To prevent fleas (or other pests)	No	NA	Advocate;Bravecto;Stronghold;Seresto collar	Bravecto	6	From a veterinary practice	Yes
2020/06/22 7:20:35 PM GMT+1	Dog	Medium (10-20 kg)	17	2	Yes	To prevent fleas (or other pests)	No	NA	Prinovox	Prinovox	12	From a supermarket	Yes	Yes	Yes	No	No	No	NA	Yes	May	2	On the furniture;On the floor;In a crate	In a crate	Every 3 months	Every day	Don't know	In a bath, sink or shower	Every week or more	3 hours	6 hours	Mainly on unpaved surfaces like field margins, forest tracks or the beach	Yes, I walk my dog even if it is raining heavily and my dog gets completely wet	7	Bag and bin (specific dog poo bin);Bag and bin (home council bin);Straight in a bin (of any kind)	Bag and bin (specific dog poo bin)	No	NA	NA	NA	NA	NA	NA	NA	NA	NA	NA	NA	NA
2020/06/22 7:20:47 PM GMT+1	Cat	NA	NA	NA	NA	NA	NA	NA	NA	NA	NA	NA	NA	NA	NA	NA	NA	NA	NA	NA	NA	NA	NA	NA	NA	NA	NA	NA	NA	NA	NA	NA	NA	NA	NA	NA	NA	Small (below 4kg)	3.75	<1	Yes	To prevent fleas (or other pests)	No	NA	Advocate	Advocate	6	From a veterinary practice	Yes
2020/06/22 7:24:44 PM GMT+1	Cat	NA	NA	NA	NA	NA	NA	NA	NA	NA	NA	NA	NA	NA	NA	NA	NA	NA	NA	NA	NA	NA	NA	NA	NA	NA	NA	NA	NA	NA	NA	NA	NA	NA	NA	NA	NA	Large (above 4 kg)	5.2	5	Yes	To prevent fleas (or other pests)	No	NA	Effipro Spot On	Effipro Spot On	Don't know	Online	Don't know
2020/06/22 7:26:03 PM GMT+1	Dog	Large (20-40kg)	22	2	Yes	To prevent fleas (or other pests)	Yes	No More Bites	No More Bites (herbal)	No More Bites (herbal)	12	Online	Yes	No	NA	No	No	No	NA	Yes	March;April;May;June	12	In a crate	In a crate	Every 2 weeks	Every day	Every 3 months	At the groomers	Every month	2 hours	3 hours	An equal mixture of the above	Yes, I will walk my dog in light drizzle	10	Bag and bin (specific dog poo bin);Bag and bin (home council bin)	Bag and bin (home council bin)	No	NA	NA	NA	NA	NA	NA	NA	NA	NA	NA	NA	NA
2020/06/22 7:28:28 PM GMT+1	Cat	NA	NA	NA	NA	NA	NA	NA	NA	NA	NA	NA	NA	NA	NA	NA	NA	NA	NA	NA	NA	NA	NA	NA	NA	NA	NA	NA	NA	NA	NA	NA	NA	NA	NA	NA	NA	Large (above 4 kg)	4.5	9	Yes	To prevent fleas (or other pests)	No	NA	Activyl	Activyl	4	From a veterinary practice	No
2020/06/22 7:28:38 PM GMT+1	Dog	Large (20-40kg)	29	3	Yes	To prevent fleas (or other pests)	No	NA	Bravecto tablet	Bravecto tablet	3	From a veterinary practice	NA	NA	NA	No	No	No	NA	No	NA	3	In their own bed;On the furniture;On a family member's bed;On the floor	In their own bed	Every 3 months	Every day	Every month	In a bath, sink or shower	Less than once a year	2 hours	3 hours	Mainly on unpaved surfaces like field margins, forest tracks or the beach	Yes, I walk my dog even if it is raining heavily and my dog gets completely wet	10	Bag and bin (home council bin)	Bag and bin (home council bin)	No	NA	NA	NA	NA	NA	NA	NA	NA	NA	NA	NA	NA
2020/06/22 7:30:24 PM GMT+1	Cat	NA	NA	NA	NA	NA	NA	NA	NA	NA	NA	NA	NA	NA	NA	NA	NA	NA	NA	NA	NA	NA	NA	NA	NA	NA	NA	NA	NA	NA	NA	NA	NA	NA	NA	NA	NA	Small (below 4kg)	3.5	5	Yes	To prevent fleas (or other pests)	No	NA	Advocate	Advocate	4	From a veterinary practice	Yes
2020/06/22 7:31:27 PM GMT+1	Dog	Medium (10-20 kg)	14	2	Yes	To prevent fleas (or other pests)	No	NA	Frontline or Frontline Combo spot on	Frontline or Frontline Combo spot on	12	Online	Yes	Yes	Yes	No	Yes	Yes	April;May	Don't know	NA	6	In their own bed;On the furniture;On a family member's bed;On the floor;In a crate	On a family member's bed	Every month	Every day	Every month	In a bath, sink or shower	Less than once a year	1 hour	6 hours	An equal mixture of the above	Yes, I will walk my dog in light drizzle	10	Bag and bin (specific dog poo bin);Bag and bin (home council bin)	Bag and bin (home council bin)	No	NA	NA	NA	NA	NA	NA	NA	NA	NA	NA	NA	NA
2020/06/22 7:32:49 PM GMT+1	Cat	NA	NA	NA	NA	NA	NA	NA	NA	NA	NA	NA	NA	NA	NA	NA	NA	NA	NA	NA	NA	NA	NA	NA	NA	NA	NA	NA	NA	NA	NA	NA	NA	NA	NA	NA	NA	Large (above 4 kg)	5	3	Yes	In response to a flea infestation	No	NA	Bravecto	Bravecto	4	From a veterinary practice	Yes
2020/06/22 7:35:17 PM GMT+1	Cat	NA	NA	NA	NA	NA	NA	NA	NA	NA	NA	NA	NA	NA	NA	NA	NA	NA	NA	NA	NA	NA	NA	NA	NA	NA	NA	NA	NA	NA	NA	NA	NA	NA	NA	NA	NA	Large (above 4 kg)	5	4	Yes	To prevent fleas (or other pests)	No	NA	Advantage;Frontline or Frontline Combo	Advantage	12	Online	Yes
2020/06/22 7:35:26 PM GMT+1	Cat	NA	NA	NA	NA	NA	NA	NA	NA	NA	NA	NA	NA	NA	NA	NA	NA	NA	NA	NA	NA	NA	NA	NA	NA	NA	NA	NA	NA	NA	NA	NA	NA	NA	NA	NA	NA	Large (above 4 kg)	5	14	Yes	In response to a flea infestation	No	NA	Advocate;Advantage	Advantage	9	Online	Yes
2020/06/22 7:35:44 PM GMT+1	Dog	Large (20-40kg)	37	8	Yes	To prevent fleas (or other pests)	Yes	NA	Bravecto tablet	Frontline or Frontline Combo spot on	2	From a veterinary practice	Yes	NA	NA	Yes	No	No	NA	No	NA	2	In their own bed;On the furniture;On a family member's bed;On the floor	On the furniture	Every month	Every day	Every 3 months	At the groomers	Never	30 minutes	1 hour	Mainly on paved surfaces	Yes, I will walk my dog in light drizzle	10	Bag and bin (specific dog poo bin);Bag and bin (home council bin);Straight in a bin (of any kind)	Bag and bin (specific dog poo bin)	No	NA	NA	NA	NA	NA	NA	NA	NA	NA	NA	NA	NA
2020/06/22 7:35:45 PM GMT+1	Dog	Large (20-40kg)	20	3	No	NA	NA	NA	NA	NA	NA	NA	NA	NA	NA	NA	No	No	NA	No	NA	None	In their own bed;On the furniture;On the floor	In their own bed	Every month	Don't know	Never	NA	Never	1 hour	3 hours	Mainly on unpaved surfaces like field margins, forest tracks or the beach	Yes, I will walk my dog in light drizzle	9	Bag and bin (home council bin);Flush down the toilet	Bag and bin (home council bin)	No	NA	NA	NA	NA	NA	NA	NA	NA	NA	NA	NA	NA
2020/06/22 7:36:05 PM GMT+1	Dog	Large (20-40kg)	25.3	6	Yes	In response to other pests (eg ticks)	No	NA	Bravecto tablet	Bravecto tablet	2	From a veterinary practice	NA	NA	NA	No	No	No	NA	Yes	May;June;July;August	2	In their own bed;On the furniture;On the floor	On the furniture	Every 2 weeks	Every day	Every 3 months	In a bath, sink or shower	Every week or more	2 hours	6 hours	Mainly on unpaved surfaces like field margins, forest tracks or the beach	Yes, I walk my dog even if it is raining heavily and my dog gets completely wet	8	Bag and bin (specific dog poo bin);Bag and bin (home council bin);Bury in the ground	Bag and bin (home council bin)	No	NA	NA	NA	NA	NA	NA	NA	NA	NA	NA	NA	NA
2020/06/22 7:36:38 PM GMT+1	Cat	NA	NA	NA	NA	NA	NA	NA	NA	NA	NA	NA	NA	NA	NA	NA	NA	NA	NA	NA	NA	NA	NA	NA	NA	NA	NA	NA	NA	NA	NA	NA	NA	NA	NA	NA	NA	Small (below 4kg)	3.6	3	Yes	To prevent fleas (or other pests)	No	NA	Credelio;Stronghold	Credelio	3	From a veterinary practice	Yes
2020/06/22 7:36:41 PM GMT+1	Cat	NA	NA	NA	NA	NA	NA	NA	NA	NA	NA	NA	NA	NA	NA	NA	NA	NA	NA	NA	NA	NA	NA	NA	NA	NA	NA	NA	NA	NA	NA	NA	NA	NA	NA	NA	NA	Small (below 4kg)	4	13	Yes	To prevent fleas (or other pests)	No	NA	Frontline or Frontline Combo	Frontline or Frontline Combo	10	From a petshop	No
2020/06/22 7:40:29 PM GMT+1	Cat	NA	NA	NA	NA	NA	NA	NA	NA	NA	NA	NA	NA	NA	NA	NA	NA	NA	NA	NA	NA	NA	NA	NA	NA	NA	NA	NA	NA	NA	NA	NA	NA	NA	NA	NA	NA	Large (above 4 kg)	4.5	9	Yes	To prevent fleas (or other pests)	No	NA	Bravecto	Bravecto	4	From a veterinary practice	Yes
2020/06/22 7:40:40 PM GMT+1	Cat	NA	NA	NA	NA	NA	NA	NA	NA	NA	NA	NA	NA	NA	NA	NA	NA	NA	NA	NA	NA	NA	NA	NA	NA	NA	NA	NA	NA	NA	NA	NA	NA	NA	NA	NA	NA	Large (above 4 kg)	4.2	9	Yes	To prevent fleas (or other pests)	No	NA	Credelio;Stronghold	Stronghold	12	From a veterinary practice	Yes
2020/06/22 7:40:49 PM GMT+1	Dog	Medium (10-20 kg)	NA	1	Yes	In response to a flea infestation	Yes	Apple cider vinegar and water.	Frontline or Frontline Combo spot on	Frontline or Frontline Combo spot on	3	Online	No	Yes	Yes	Yes	Yes	Yes	June	No	NA	3	In their own bed;In a crate	In their own bed	Every 2 weeks	Every day	Every month	In a bath, sink or shower	Every 6 months	1 hour	2 hours	Mainly on unpaved surfaces like field margins, forest tracks or the beach	Yes, I walk my dog even if it is raining heavily and my dog gets completely wet	10	Bag and bin (specific dog poo bin)	Bag and bin (home council bin)	No	NA	NA	NA	NA	NA	NA	NA	NA	NA	NA	NA	NA
2020/06/22 7:41:32 PM GMT+1	Dog	Medium (10-20 kg)	12.5	13	Yes	To prevent fleas (or other pests)	No	NA	Bravecto tablet	Bravecto tablet	4	From a veterinary practice	NA	NA	NA	No	No	No	NA	No	NA	4	In their own bed;On the furniture;On a family member's bed;On the floor	On a family member's bed	Every week or more	Every day	Every month	In a bath, sink or shower	Every month	2 hours	3 hours	Mainly on unpaved surfaces like field margins, forest tracks or the beach	Yes, I walk my dog even if it is raining heavily and my dog gets completely wet	10	Bag and bin (home council bin)	Bag and bin (home council bin)	No	NA	NA	NA	NA	NA	NA	NA	NA	NA	NA	NA	NA
2020/06/22 7:43:26 PM GMT+1	Dog	Large (20-40kg)	28	3	Yes	In response to other pests (eg ticks)	No	NA	NexGard Spectra	NexGard Spectra	2	From a veterinary practice	NA	NA	NA	No	No	No	NA	Yes	June	1	In their own bed;On the furniture;On the floor	In their own bed	Every month	Every day	Every 6 months	Outdoors	Every week or more	2 hours	3 hours	Mainly on unpaved surfaces like field margins, forest tracks or the beach	Yes, I walk my dog even if it is raining heavily and my dog gets completely wet	2	Bag and bin (specific dog poo bin);Bag and bin (home council bin);Bury in the ground	Bury in the ground	No	NA	NA	NA	NA	NA	NA	NA	NA	NA	NA	NA	NA
2020/06/22 7:43:55 PM GMT+1	Cat	NA	NA	NA	NA	NA	NA	NA	NA	NA	NA	NA	NA	NA	NA	NA	NA	NA	NA	NA	NA	NA	NA	NA	NA	NA	NA	NA	NA	NA	NA	NA	NA	NA	NA	NA	NA	Large (above 4 kg)	4.75	5	Yes	To prevent fleas (or other pests)	No	NA	Bravecto;Credelio;Stronghold	Bravecto	4	From a veterinary practice	No
2020/06/22 7:45:20 PM GMT+1	Cat	NA	NA	NA	NA	NA	NA	NA	NA	NA	NA	NA	NA	NA	NA	NA	NA	NA	NA	NA	NA	NA	NA	NA	NA	NA	NA	NA	NA	NA	NA	NA	NA	NA	NA	NA	NA	Small (below 4kg)	3.4	8	Yes	To prevent fleas (or other pests)	No	NA	Frontline or Frontline Combo;Stronghold	Frontline or Frontline Combo	12	Other type of shop - pharmacy/agricultural/equestrian/other	No
2020/06/22 7:45:43 PM GMT+1	Dog	Small (4-10kg)	9	7	Yes	To prevent fleas (or other pests)	No	NA	Advocate;Effipro Spot On;Frontline or Frontline Combo spot on	Frontline or Frontline Combo spot on	4	Online	No	Yes	Yes	No	No	No	NA	Yes	June;July;August	4	In their own bed;On the furniture;On a family member's bed;On the floor	In their own bed	Every 3 months	Every day	Every 3 months	In a bath, sink or shower	Every week or more	30 minutes	1 hour	Mainly on unpaved surfaces like field margins, forest tracks or the beach	Yes, I will walk my dog in light drizzle	10	Bag and bin (specific dog poo bin);Bag and bin (home council bin)	Bag and bin (specific dog poo bin)	No	NA	NA	NA	NA	NA	NA	NA	NA	NA	NA	NA	NA
2020/06/22 7:45:46 PM GMT+1	Dog	Medium (10-20 kg)	13.5	9	Yes	To prevent fleas (or other pests)	No	NA	Frontline or Frontline Combo spot on	Frontline or Frontline Combo spot on	6	From a veterinary practice	Yes	Yes	Yes	No	No	No	NA	Yes	May;June;September	4	In a crate	In a crate	Every week or more	Every day	Every 6 months	In a bath, sink or shower	Never	2 hours	6 hours	An equal mixture of the above	Yes, I walk my dog even if it is raining heavily and my dog gets completely wet	10	Bag and bin (specific dog poo bin);Bag and bin (home council bin)	Straight in a bin (of any kind)	No	NA	NA	NA	NA	NA	NA	NA	NA	NA	NA	NA	NA
2020/06/22 7:46:11 PM GMT+1	Cat	NA	NA	NA	NA	NA	NA	NA	NA	NA	NA	NA	NA	NA	NA	NA	NA	NA	NA	NA	NA	NA	NA	NA	NA	NA	NA	NA	NA	NA	NA	NA	NA	NA	NA	NA	NA	Large (above 4 kg)	NA	6	Yes	To prevent fleas (or other pests)	No	NA	Advocate;Frontline or Frontline Combo	Advocate	4	From a veterinary practice	No
2020/06/22 7:46:38 PM GMT+1	Dog	Small (4-10kg)	6	12	Yes	To prevent fleas (or other pests)	Yes	I only use homeopathic flea combination tablets from Ainsworths	Only homeopathy	Homeopathy	12	Online	NA	NA	NA	No	No	No	NA	No	NA	2	In their own bed;On the furniture;On a family member's bed;On the floor	On a family member's bed	Every 2 weeks	Every day	Every 3 months	In a bath, sink or shower	Never	2 hours	3 hours	An equal mixture of the above	Yes, I walk my dog even if it is raining heavily and my dog gets completely wet	10	Bag and bin (specific dog poo bin)	Bag and bin (specific dog poo bin)	No	NA	NA	NA	NA	NA	NA	NA	NA	NA	NA	NA	NA
2020/06/22 7:48:44 PM GMT+1	Cat	NA	NA	NA	NA	NA	NA	NA	NA	NA	NA	NA	NA	NA	NA	NA	NA	NA	NA	NA	NA	NA	NA	NA	NA	NA	NA	NA	NA	NA	NA	NA	NA	NA	NA	NA	NA	Large (above 4 kg)	6	7	No	NA	NA	NA	NA	NA	NA	NA	NA
2020/06/22 7:49:19 PM GMT+1	Dog	Small (4-10kg)	6.5	3	Yes	To prevent fleas (or other pests)	No	NA	NexGard Spectra	NexGard Spectra	10	From a veterinary practice	NA	NA	NA	No	No	No	NA	No	NA	12	In their own bed;In a crate	In their own bed	Every 2 weeks	Every day	Every 2 weeks	In a bath, sink or shower	Never	30 minutes	2 hours	An equal mixture of the above	Occasionally, but I try to avoid this	10	Bag and bin (specific dog poo bin);Bag and bin (home council bin);Straight in a bin (of any kind)	Bag and bin (home council bin)	No	NA	NA	NA	NA	NA	NA	NA	NA	NA	NA	NA	NA
2020/06/22 7:49:26 PM GMT+1	Cat	NA	NA	NA	NA	NA	NA	NA	NA	NA	NA	NA	NA	NA	NA	NA	NA	NA	NA	NA	NA	NA	NA	NA	NA	NA	NA	NA	NA	NA	NA	NA	NA	NA	NA	NA	NA	Small (below 4kg)	3.2	8	Yes	To prevent fleas (or other pests)	No	NA	Broadline	Broadline	6	From a veterinary practice	Yes
2020/06/22 7:50:34 PM GMT+1	Dog	Medium (10-20 kg)	13	5	Yes	To prevent fleas (or other pests)	No	NA	Simparica	Simparica	6	From a veterinary practice	NA	NA	NA	No	No	No	NA	No	NA	4	In a crate	In a crate	Every 3 months	Every day	Every 3 months	In a bath, sink or shower	Never	30 minutes	2 hours	Mainly on unpaved surfaces like field margins, forest tracks or the beach	Yes, I walk my dog even if it is raining heavily and my dog gets completely wet	9	Bag and bin (specific dog poo bin);Bag and bin (home council bin);Straight in a bin (of any kind)	Straight in a bin (of any kind)	No	NA	NA	NA	NA	NA	NA	NA	NA	NA	NA	NA	NA
2020/06/22 7:51:16 PM GMT+1	Dog	Large (20-40kg)	23	<1	Yes	To prevent fleas (or other pests)	No	NA	NexGard Spectra	NexGard Spectra	8	From a veterinary practice	NA	NA	NA	No	No	No	NA	No	NA	8	In their own bed;On the furniture;On the floor	In their own bed	Every 3 months	Every day	Every month	In a bath, sink or shower	Every month	1 hour	2 hours	An equal mixture of the above	Yes, I will walk my dog in light drizzle	9	Bag and bin (specific dog poo bin);Bag and bin (home council bin)	Bag and bin (specific dog poo bin)	No	NA	NA	NA	NA	NA	NA	NA	NA	NA	NA	NA	NA
2020/06/22 7:51:54 PM GMT+1	Cat	NA	NA	NA	NA	NA	NA	NA	NA	NA	NA	NA	NA	NA	NA	NA	NA	NA	NA	NA	NA	NA	NA	NA	NA	NA	NA	NA	NA	NA	NA	NA	NA	NA	NA	NA	NA	Small (below 4kg)	3.2	13	Yes	To prevent fleas (or other pests)	No	NA	Frontline or Frontline Combo	Frontline or Frontline Combo	4	From a veterinary practice	No
2020/06/22 7:53:01 PM GMT+1	Dog	Large (20-40kg)	38	9	No	NA	NA	NA	NA	NA	NA	NA	NA	NA	NA	NA	No	No	NA	No	NA	4	In their own bed;On the furniture;On a family member's bed;On the floor	On the floor	Every 3 months	Every day	Every 3 months	At the groomers	Every 6 months	30 minutes	6 hours	An equal mixture of the above	Yes, I walk my dog even if it is raining heavily and my dog gets completely wet	10	Bag and bin (specific dog poo bin);Bag and bin (home council bin)	Bag and bin (specific dog poo bin)	No	NA	NA	NA	NA	NA	NA	NA	NA	NA	NA	NA	NA
2020/06/22 7:54:26 PM GMT+1	Dog	Large (20-40kg)	22	14	Yes	To prevent fleas (or other pests)	No	NA	Advocate	Advocate	12	From a veterinary practice	Yes	Yes	Yes	Yes	No	No	NA	Yes	May;June	4	In their own bed;On the furniture;On a family member's bed;On the floor	On the furniture	Every month	Every day	Every month	In a bath, sink or shower	Every month	1 hour	2 hours	An equal mixture of the above	Yes, I walk my dog even if it is raining heavily and my dog gets completely wet	10	Bag and bin (specific dog poo bin);Bag and bin (home council bin)	Bag and bin (specific dog poo bin)	No	NA	NA	NA	NA	NA	NA	NA	NA	NA	NA	NA	NA
2020/06/22 7:54:53 PM GMT+1	Cat	NA	NA	NA	NA	NA	NA	NA	NA	NA	NA	NA	NA	NA	NA	NA	NA	NA	NA	NA	NA	NA	NA	NA	NA	NA	NA	NA	NA	NA	NA	NA	NA	NA	NA	NA	NA	Large (above 4 kg)	4	15	Yes	To prevent fleas (or other pests)	No	NA	Advantage	Advantage	4	Online	Yes
2020/06/22 7:55:05 PM GMT+1	Cat	NA	NA	NA	NA	NA	NA	NA	NA	NA	NA	NA	NA	NA	NA	NA	NA	NA	NA	NA	NA	NA	NA	NA	NA	NA	NA	NA	NA	NA	NA	NA	NA	NA	NA	NA	NA	Large (above 4 kg)	NA	7	Yes	To prevent fleas (or other pests)	No	NA	Bob Martin Clear / Clear Plus (Fipronil);Johnson?ÇÖs	Johnson?ÇÖs	2	From a petshop	Yes
2020/06/22 7:56:11 PM GMT+1	Dog	Large (20-40kg)	35	6	Yes	To prevent fleas (or other pests)	No	NA	Bravecto tablet	Bravecto tablet	4	From a veterinary practice	NA	NA	NA	No	No	No	NA	No	NA	12	On the furniture;On the floor	On the furniture	Every month	Every 2 days	Every month	In a bath, sink or shower	Every month	2 hours	2 hours	Mainly on unpaved surfaces like field margins, forest tracks or the beach	Yes, I walk my dog even if it is raining heavily and my dog gets completely wet	10	Bag and bin (specific dog poo bin);Bag and bin (home council bin);Straight in a bin (of any kind)	Bag and bin (home council bin)	No	NA	NA	NA	NA	NA	NA	NA	NA	NA	NA	NA	NA
2020/06/22 7:58:23 PM GMT+1	Dog	Medium (10-20 kg)	18	6	No	NA	NA	NA	NA	NA	NA	NA	NA	NA	NA	NA	No	No	NA	No	NA	1	In their own bed;On the furniture;On a family member's bed;On the floor;In a crate	On the furniture	Every 2 weeks	Every day	Less than once a year	In a bath, sink or shower	Every 2 weeks	1 hour	2 hours	Mainly on unpaved surfaces like field margins, forest tracks or the beach	Yes, I walk my dog even if it is raining heavily and my dog gets completely wet	9	Bag and bin (specific dog poo bin);Bag and bin (home council bin)	Bag and bin (home council bin)	No	NA	NA	NA	NA	NA	NA	NA	NA	NA	NA	NA	NA
2020/06/22 7:59:19 PM GMT+1	Dog	Large (20-40kg)	25	1	Yes	To prevent fleas (or other pests)	No	NA	Advocate	Advocate	12	Other type of shop - pharmacy/agricultural/equestrian/other	Yes	Yes	Yes	No	No	No	NA	No	NA	6	In a crate	In a crate	Every 3 months	Every day	Every month	At the groomers	Every week or more	1 hour	2 hours	Mainly on unpaved surfaces like field margins, forest tracks or the beach	Yes, I walk my dog even if it is raining heavily and my dog gets completely wet	10	Bag and bin (specific dog poo bin);Bag and bin (home council bin);Straight in a bin (of any kind)	Bag and bin (home council bin)	No	NA	NA	NA	NA	NA	NA	NA	NA	NA	NA	NA	NA
2020/06/22 7:59:41 PM GMT+1	Cat	NA	NA	NA	NA	NA	NA	NA	NA	NA	NA	NA	NA	NA	NA	NA	NA	NA	NA	NA	NA	NA	NA	NA	NA	NA	NA	NA	NA	NA	NA	NA	NA	NA	NA	NA	NA	Small (below 4kg)	4	2	Yes	To prevent fleas (or other pests)	No	NA	Bravecto	Bravecto	4	From a veterinary practice	Yes
2020/06/22 7:59:43 PM GMT+1	Dog	Large (20-40kg)	37	8	Yes	In response to other pests (eg ticks)	No	NA	Effipro Spot On;Fipnil/ Fipralone/ Fiprene/ Fiprex/ Fiproclear/ Fiprofile/ Fipronil/ Fiprotec/ Fiproxole/ Fleanil/ Fleascreen/ Flevox/ Flick/ Fyperix;Frontline or Frontline Combo spot on	Effipro Spot On	3	Other type of shop - pharmacy/agricultural/equestrian/other	Yes	NA	NA	Yes	No	No	NA	Yes	May	3	In their own bed	In their own bed	Every 2 weeks	Never	Every month	In a bath, sink or shower	Never	1 hour	1 hour	Mainly on unpaved surfaces like field margins, forest tracks or the beach	Yes, I walk my dog even if it is raining heavily and my dog gets completely wet	9	Bag and bin (specific dog poo bin)	Bag and bin (specific dog poo bin)	No	NA	NA	NA	NA	NA	NA	NA	NA	NA	NA	NA	NA
2020/06/22 7:59:49 PM GMT+1	Cat	NA	NA	NA	NA	NA	NA	NA	NA	NA	NA	NA	NA	NA	NA	NA	NA	NA	NA	NA	NA	NA	NA	NA	NA	NA	NA	NA	NA	NA	NA	NA	NA	NA	NA	NA	NA	Small (below 4kg)	NA	2	Yes	In response to a flea infestation	No	NA	Johnsons fleas tablets	Johnsons flea tablets	3	Online	NA
2020/06/22 8:00:19 PM GMT+1	Dog	Medium (10-20 kg)	15	2	Yes	To prevent fleas (or other pests)	No	NA	Advocate	Advocate	12	From a veterinary practice	Yes	Yes	Yes	Yes	No	No	NA	Yes	May;June	4	In their own bed;On the furniture;On a family member's bed;On the floor	In their own bed	Every month	Every day	Every month	In a bath, sink or shower	Every month	1 hour	2 hours	An equal mixture of the above	Yes, I walk my dog even if it is raining heavily and my dog gets completely wet	10	Bag and bin (specific dog poo bin);Bag and bin (home council bin)	Bag and bin (home council bin)	No	NA	NA	NA	NA	NA	NA	NA	NA	NA	NA	NA	NA
2020/06/22 8:02:17 PM GMT+1	Cat	NA	NA	NA	NA	NA	NA	NA	NA	NA	NA	NA	NA	NA	NA	NA	NA	NA	NA	NA	NA	NA	NA	NA	NA	NA	NA	NA	NA	NA	NA	NA	NA	NA	NA	NA	NA	Large (above 4 kg)	5	3	Yes	To prevent fleas (or other pests)	No	NA	Broadline	Broadline	10	From a veterinary practice	Yes
2020/06/22 8:02:28 PM GMT+1	Cat	NA	NA	NA	NA	NA	NA	NA	NA	NA	NA	NA	NA	NA	NA	NA	NA	NA	NA	NA	NA	NA	NA	NA	NA	NA	NA	NA	NA	NA	NA	NA	NA	NA	NA	NA	NA	Large (above 4 kg)	5	3	No	NA	NA	NA	NA	NA	NA	NA	NA
2020/06/22 8:02:30 PM GMT+1	Dog	Small (4-10kg)	9	4	Yes	To prevent fleas (or other pests)	No	NA	Bravecto tablet	Bravecto tablet	4	From a veterinary practice	Don't know	No	NA	No	No	No	NA	No	NA	12	On a family member's bed	On a family member's bed	Every week or more	Every day	Every week or more	In a bath, sink or shower	Every 3 months	1 hour	3 hours	An equal mixture of the above	Never	10	Bag and bin (specific dog poo bin)	Bag and bin (specific dog poo bin)	No	NA	NA	NA	NA	NA	NA	NA	NA	NA	NA	NA	NA
2020/06/22 8:02:56 PM GMT+1	Cat	NA	NA	NA	NA	NA	NA	NA	NA	NA	NA	NA	NA	NA	NA	NA	NA	NA	NA	NA	NA	NA	NA	NA	NA	NA	NA	NA	NA	NA	NA	NA	NA	NA	NA	NA	NA	Small (below 4kg)	3	5	Yes	To prevent fleas (or other pests)	No	NA	Frontline or Frontline Combo	Frontline or Frontline Combo	10	Online	No
2020/06/22 8:03:37 PM GMT+1	Dog	Large (20-40kg)	20.2	2	Yes	To prevent fleas (or other pests)	No	NA	Advocate;Frontline or Frontline Combo spot on	Frontline or Frontline Combo spot on	5	From a petshop	No	Yes	Yes	No	No	No	NA	No	NA	4	In their own bed	In their own bed	Every month	Every day	Less than once a year	In a bath, sink or shower	Every week or more	2 hours	3 hours	Mainly on unpaved surfaces like field margins, forest tracks or the beach	Yes, I walk my dog even if it is raining heavily and my dog gets completely wet	10	Bag and bin (specific dog poo bin);Straight in a bin (of any kind)	Bag and bin (specific dog poo bin)	No	NA	NA	NA	NA	NA	NA	NA	NA	NA	NA	NA	NA
2020/06/22 8:06:04 PM GMT+1	Dog	Large (20-40kg)	28	15	Yes	In response to other pests (eg ticks)	Yes	Diamophous earth	Bravecto spot on	Bravecto spot on	1	Other type of shop - pharmacy/agricultural/equestrian/other	Yes	Yes	Yes	Maybe	Don't know	Don't know	NA	Yes	July	1	In their own bed;On the furniture;On the floor	On the furniture	Every week or more	Every day	Never	NA	Every 2 weeks	1 hour	2 hours	An equal mixture of the above	Yes, I walk my dog even if it is raining heavily and my dog gets completely wet	5	Straight in a bin (of any kind);Bury in the ground	Bury in the ground	No	NA	NA	NA	NA	NA	NA	NA	NA	NA	NA	NA	NA
2020/06/22 8:08:44 PM GMT+1	Cat	NA	NA	NA	NA	NA	NA	NA	NA	NA	NA	NA	NA	NA	NA	NA	NA	NA	NA	NA	NA	NA	NA	NA	NA	NA	NA	NA	NA	NA	NA	NA	NA	NA	NA	NA	NA	Large (above 4 kg)	NA	10	No	NA	NA	NA	NA	NA	NA	NA	NA
2020/06/22 8:09:07 PM GMT+1	Dog	Large (20-40kg)	27	2	No	NA	NA	NA	NA	NA	NA	NA	NA	NA	NA	NA	No	No	NA	No	NA	1	In their own bed	In their own bed	Every month	Every day	Every month	Outdoors	Every week or more	1 hour	2 hours	An equal mixture of the above	Occasionally, but I try to avoid this	9	Bag and bin (specific dog poo bin);Bag and bin (home council bin)	Bag and bin (home council bin)	No	NA	NA	NA	NA	NA	NA	NA	NA	NA	NA	NA	NA
2020/06/22 8:11:38 PM GMT+1	Cat	NA	NA	NA	NA	NA	NA	NA	NA	NA	NA	NA	NA	NA	NA	NA	NA	NA	NA	NA	NA	NA	NA	NA	NA	NA	NA	NA	NA	NA	NA	NA	NA	NA	NA	NA	NA	Large (above 4 kg)	5	9	Yes	To prevent fleas (or other pests)	No	NA	Frontline or Frontline Combo	Frontline or Frontline Combo	3	Online	Yes
2020/06/22 8:11:46 PM GMT+1	Dog	Large (20-40kg)	20	8	Yes	To prevent fleas (or other pests)	No	NA	Advocate	Advocate	10	From a veterinary practice	No	Yes	Yes	No	No	No	NA	No	NA	3	In their own bed;On the furniture;On a family member's bed;On the floor	In their own bed	Every month	Every day	Every week or more	Outdoors	Never	1 hour	3 hours	An equal mixture of the above	Occasionally, but I try to avoid this	10	Bag and bin (home council bin)	Bag and bin (home council bin)	No	NA	NA	NA	NA	NA	NA	NA	NA	NA	NA	NA	NA
2020/06/22 8:13:42 PM GMT+1	Cat	NA	NA	NA	NA	NA	NA	NA	NA	NA	NA	NA	NA	NA	NA	NA	NA	NA	NA	NA	NA	NA	NA	NA	NA	NA	NA	NA	NA	NA	NA	NA	NA	NA	NA	NA	NA	Small (below 4kg)	NA	12	Yes	To prevent fleas (or other pests)	Yes	Diatomacious earth	Fipnil/Fipralone/Fiprene/ Fiprex/ Fiproclear/Fiprofile/Fipronil/Fiprotec/Fiproxole/Fleanil/Fleascreen/Flevox/Flick/Fyperix	Frontline generic	6	Online	No
2020/06/22 8:14:37 PM GMT+1	Cat	NA	NA	NA	NA	NA	NA	NA	NA	NA	NA	NA	NA	NA	NA	NA	NA	NA	NA	NA	NA	NA	NA	NA	NA	NA	NA	NA	NA	NA	NA	NA	NA	NA	NA	NA	NA	Small (below 4kg)	3.89	12	Yes	To prevent fleas (or other pests)	No	NA	Advocate	Advocate	1	From a veterinary practice	No
2020/06/22 8:15:11 PM GMT+1	Dog	Large (20-40kg)	NA	11	Yes	To prevent fleas (or other pests)	Don't know	NA	Frontline or Frontline Combo spot on	Frontline or Frontline Combo spot on	6	From a supermarket	Yes	Yes	Yes	No	No	No	NA	No	NA	None	On a family member's bed	On a family member's bed	Every week or more	Every day	Every 6 months	At the groomers	Never	2 hours	2 hours	An equal mixture of the above	Yes, I will walk my dog in light drizzle	10	Bag and bin (specific dog poo bin);Bag and bin (home council bin);Straight in a bin (of any kind)	Bag and bin (specific dog poo bin)	No	NA	NA	NA	NA	NA	NA	NA	NA	NA	NA	NA	NA
2020/06/22 8:16:00 PM GMT+1	Cat	NA	NA	NA	NA	NA	NA	NA	NA	NA	NA	NA	NA	NA	NA	NA	NA	NA	NA	NA	NA	NA	NA	NA	NA	NA	NA	NA	NA	NA	NA	NA	NA	NA	NA	NA	NA	Large (above 4 kg)	4.6	7	No	NA	NA	NA	NA	NA	NA	NA	NA
2020/06/22 8:16:51 PM GMT+1	Dog	Small (4-10kg)	9	8	Yes	To prevent fleas (or other pests)	No	NA	Frontline or Frontline Combo spot on	Frontline or Frontline Combo spot on	6	Online	Yes	Yes	Yes	No	Yes	Yes	June	Yes	Don't know	None	In their own bed;On the furniture;On a family member's bed;On the floor	In their own bed	Every month	Every day	Every 3 months	In a bath, sink or shower	Every month	1 hour	2 hours	An equal mixture of the above	Yes, I walk my dog even if it is raining heavily and my dog gets completely wet	10	Bag and bin (specific dog poo bin);Bag and bin (home council bin)	Bag and bin (specific dog poo bin)	No	NA	NA	NA	NA	NA	NA	NA	NA	NA	NA	NA	NA
2020/06/22 8:16:52 PM GMT+1	Dog	Medium (10-20 kg)	16	7	Yes	To prevent fleas (or other pests)	No	NA	Simparica	Simparica	12	From a veterinary practice	NA	NA	NA	No	No	No	NA	No	NA	4	On a family member's bed;In a crate	In a crate	Every 3 months	Every day	Once a year	In a bath, sink or shower	Never	1 hour	2 hours	Mainly on paved surfaces	Occasionally, but I try to avoid this	10	Bag and bin (specific dog poo bin);Bag and bin (home council bin);Straight in a bin (of any kind)	Bag and bin (home council bin)	No	NA	NA	NA	NA	NA	NA	NA	NA	NA	NA	NA	NA
2020/06/22 8:17:47 PM GMT+1	Dog	Medium (10-20 kg)	18	5	Yes	To prevent fleas (or other pests)	No	NA	Advocate	Advocate	4	Online	Yes	Yes	Yes	No	No	No	NA	Yes	May;June	4	In their own bed	In their own bed	Less than once a year	Every day	Every week or more	In a bath, sink or shower	Every week or more	1 hour	2 hours	Mainly on unpaved surfaces like field margins, forest tracks or the beach	Yes, I walk my dog even if it is raining heavily and my dog gets completely wet	3	Bag and bin (home council bin)	Bag and bin (home council bin)	Yes	NA	NA	NA	NA	NA	NA	NA	NA	NA	NA	NA	NA
2020/06/22 8:21:41 PM GMT+1	Dog	Large (20-40kg)	25	13	Yes	Other reason	No	NA	Bravecto tablet	Bravecto tablet	1	From a veterinary practice	NA	NA	NA	No	No	No	NA	No	NA	None	On the floor	On the furniture	Every week or more	Every day	Every 2 weeks	In a bath, sink or shower	Never	1 hour	6 hours	An equal mixture of the above	Occasionally, but I try to avoid this	8	Bag and bin (home council bin)	Bag and bin (home council bin)	No	NA	NA	NA	NA	NA	NA	NA	NA	NA	NA	NA	NA
2020/06/22 8:21:46 PM GMT+1	Cat	NA	NA	NA	NA	NA	NA	NA	NA	NA	NA	NA	NA	NA	NA	NA	NA	NA	NA	NA	NA	NA	NA	NA	NA	NA	NA	NA	NA	NA	NA	NA	NA	NA	NA	NA	NA	Large (above 4 kg)	NA	13	Yes	In response to a flea infestation	No	NA	Stronghold	Stronghold	3	From a veterinary practice	Yes
2020/06/22 8:27:15 PM GMT+1	Dog	Medium (10-20 kg)	18	5	Yes	To prevent fleas (or other pests)	No	NA	NexGard Spectra	NexGard Spectra	10	From a veterinary practice	NA	NA	NA	No	No	No	NA	No	NA	10	In their own bed;On the furniture	In their own bed	Every 2 weeks	Every day	Every month	In a bath, sink or shower	Every 3 months	2 hours	3 hours	Mainly on unpaved surfaces like field margins, forest tracks or the beach	Yes, I walk my dog even if it is raining heavily and my dog gets completely wet	8	Bag and bin (specific dog poo bin);Bag and bin (home council bin)	Bag and bin (home council bin)	No	NA	NA	NA	NA	NA	NA	NA	NA	NA	NA	NA	NA
2020/06/22 8:27:59 PM GMT+1	Dog	Medium (10-20 kg)	12	2	Yes	To prevent fleas (or other pests)	No	NA	Bravecto tablet	Bravecto tablet	1	From a veterinary practice	NA	NA	NA	Maybe	No	Yes	May	Yes	June	1	In their own bed;On the furniture;On a family member's bed;On the floor	On the floor	Every 2 weeks	Every day	Every week or more	In a bath, sink or shower	Never	1 hour	3 hours	Mainly on unpaved surfaces like field margins, forest tracks or the beach	Yes, I will walk my dog in light drizzle	10	Bag and bin (specific dog poo bin)	Bag and bin (specific dog poo bin)	No	NA	NA	NA	NA	NA	NA	NA	NA	NA	NA	NA	NA
2020/06/22 8:29:53 PM GMT+1	Cat	NA	NA	NA	NA	NA	NA	NA	NA	NA	NA	NA	NA	NA	NA	NA	NA	NA	NA	NA	NA	NA	NA	NA	NA	NA	NA	NA	NA	NA	NA	NA	NA	NA	NA	NA	NA	Large (above 4 kg)	5	14	Yes	In response to a flea infestation	No	NA	Frontline or Frontline Combo	Frontline or Frontline Combo	1	Online	Yes
2020/06/22 8:32:12 PM GMT+1	Dog	Large (20-40kg)	NA	11	Yes	To prevent fleas (or other pests)	No	NA	Prinovox	Prinovox	4	From a veterinary practice	Yes	Yes	Yes	No	No	No	NA	No	NA	None	In their own bed;On the furniture;On a family member's bed;On the floor	On a family member's bed	Every 2 weeks	Every day	Every 6 months	In a bath, sink or shower	Once a year	1 hour	3 hours	An equal mixture of the above	Yes, I walk my dog even if it is raining heavily and my dog gets completely wet	10	Bag and bin (specific dog poo bin);Bag and bin (home council bin)	Bag and bin (specific dog poo bin)	No	NA	NA	NA	NA	NA	NA	NA	NA	NA	NA	NA	NA
2020/06/22 8:32:41 PM GMT+1	Dog	Medium (10-20 kg)	17	6	Yes	To prevent fleas (or other pests)	No	NA	Advocate	Advocate	3	From a veterinary practice	Yes	No	NA	No	No	No	NA	No	NA	4	In their own bed	In their own bed	Every week or more	Every day	Never	NA	Never	2 hours	6 hours	An equal mixture of the above	Occasionally, but I try to avoid this	10	Bag and bin (specific dog poo bin)	Bag and bin (specific dog poo bin)	No	NA	NA	NA	NA	NA	NA	NA	NA	NA	NA	NA	NA
2020/06/22 8:33:11 PM GMT+1	Dog	Large (20-40kg)	25	3	Yes	To prevent fleas (or other pests)	No	NA	NexGard Spectra	NexGard Spectra	4	From a veterinary practice	NA	NA	NA	No	No	No	NA	No	NA	4	In their own bed;On the furniture;On a family member's bed;On the floor	On the floor	Every 3 months	Every day	Every month	In a bath, sink or shower	Every week or more	2 hours	6 hours	An equal mixture of the above	Yes, I walk my dog even if it is raining heavily and my dog gets completely wet	10	Bag and bin (specific dog poo bin);Bag and bin (home council bin)	Bag and bin (specific dog poo bin)	No	NA	NA	NA	NA	NA	NA	NA	NA	NA	NA	NA	NA
2020/06/22 8:34:01 PM GMT+1	Dog	Large (20-40kg)	31	3	Yes	To prevent fleas (or other pests)	No	NA	Advocate	Advocate	12	From a veterinary practice	Yes	Yes	Yes	No	No	No	NA	No	NA	4	On a family member's bed	On a family member's bed	Every month	Every day	Every week or more	Outdoors	Once a year	2 hours	3 hours	Mainly on unpaved surfaces like field margins, forest tracks or the beach	Yes, I walk my dog even if it is raining heavily and my dog gets completely wet	10	Bag and bin (home council bin)	Bag and bin (home council bin)	No	NA	NA	NA	NA	NA	NA	NA	NA	NA	NA	NA	NA
2020/06/22 8:34:52 PM GMT+1	Dog	Large (20-40kg)	32	6	Yes	To prevent fleas (or other pests)	No	NA	Advantage	Advantage	4	From a veterinary practice	Yes	No	NA	No	No	No	NA	Yes	June;July	2	In their own bed;On the furniture;On a family member's bed;On the floor	On a family member's bed	Every 2 weeks	Every day	Every month	At the groomers	Every 3 months	30 minutes	2 hours	An equal mixture of the above	Yes, I walk my dog even if it is raining heavily and my dog gets completely wet	10	Bag and bin (specific dog poo bin);Bag and bin (home council bin)	Bag and bin (home council bin)	No	NA	NA	NA	NA	NA	NA	NA	NA	NA	NA	NA	NA
2020/06/22 8:36:28 PM GMT+1	Dog	Small (4-10kg)	4	2	Yes	To prevent fleas (or other pests)	No	NA	Frontline generic	Frontline generic	10	Online	Yes	Yes	Yes	No	Yes	Yes	Don't know	No	NA	3	In their own bed;On the furniture;On a family member's bed;On the floor	On the furniture	Every 3 months	Every day	Every 2 weeks	In a bath, sink or shower	Every week or more	1 hour	3 hours	Mainly on unpaved surfaces like field margins, forest tracks or the beach	Yes, I walk my dog even if it is raining heavily and my dog gets completely wet	9	Bag and bin (specific dog poo bin);Bag and bin (home council bin)	Bag and bin (specific dog poo bin)	No	NA	NA	NA	NA	NA	NA	NA	NA	NA	NA	NA	NA
2020/06/22 8:38:23 PM GMT+1	Dog	Large (20-40kg)	23	9	Yes	To prevent fleas (or other pests)	No	NA	Bravecto tablet	Bravecto tablet	4	From a veterinary practice	NA	NA	NA	No	No	No	NA	No	NA	12	In their own bed;On the furniture	In their own bed	Every week or more	Every day	Less than once a year	Outdoors	Every 3 months	2 hours	3 hours	Mainly on unpaved surfaces like field margins, forest tracks or the beach	Yes, I walk my dog even if it is raining heavily and my dog gets completely wet	9	Bag and bin (specific dog poo bin)	Bag and bin (specific dog poo bin)	No	NA	NA	NA	NA	NA	NA	NA	NA	NA	NA	NA	NA
2020/06/22 8:38:39 PM GMT+1	Cat	NA	NA	NA	NA	NA	NA	NA	NA	NA	NA	NA	NA	NA	NA	NA	NA	NA	NA	NA	NA	NA	NA	NA	NA	NA	NA	NA	NA	NA	NA	NA	NA	NA	NA	NA	NA	Large (above 4 kg)	7	8	No	NA	NA	NA	NA	NA	NA	NA	NA
2020/06/22 8:39:50 PM GMT+1	Cat	NA	NA	NA	NA	NA	NA	NA	NA	NA	NA	NA	NA	NA	NA	NA	NA	NA	NA	NA	NA	NA	NA	NA	NA	NA	NA	NA	NA	NA	NA	NA	NA	NA	NA	NA	NA	Small (below 4kg)	2	7	Yes	To prevent fleas (or other pests)	No	NA	Fipnil/Fipralone/Fiprene/ Fiprex/ Fiproclear/Fiprofile/Fipronil/Fiprotec/Fiproxole/Fleanil/Fleascreen/Flevox/Flick/Fyperix	Frontline generic	10	Online	Yes
2020/06/22 8:40:14 PM GMT+1	Dog	Medium (10-20 kg)	NA	12	Yes	In response to a flea infestation	Yes	NA	Advantage;Bob Martin Clear /Clear Plus (Fipronil);Frontline or Frontline Combo spot on	Frontline or Frontline Combo spot on	4	From a petshop	No	Yes	NA	No	Yes	Yes	May	No	NA	4	In their own bed;In a crate	In their own bed	Every 2 weeks	Every day	Every 2 weeks	In a bath, sink or shower	Never	30 minutes	3 hours	An equal mixture of the above	Yes, I will walk my dog in light drizzle	10	Bag and bin (specific dog poo bin);Bag and bin (home council bin)	Bag and bin (home council bin)	No	NA	NA	NA	NA	NA	NA	NA	NA	NA	NA	NA	NA
2020/06/22 8:41:53 PM GMT+1	Dog	Medium (10-20 kg)	15	6	Yes	To prevent fleas (or other pests)	No	NA	Advocate;Advantix	Advantix	12	Online	No	Yes	Yes	No	No	No	NA	No	NA	4	In their own bed;On the furniture;On the floor	In their own bed	Every month	Every day	Every month	In a bath, sink or shower	Once a year	2 hours	3 hours	Mainly on paved surfaces	Yes, I will walk my dog in light drizzle	10	Bag and bin (specific dog poo bin);Bag and bin (home council bin)	Bag and bin (home council bin)	No	NA	NA	NA	NA	NA	NA	NA	NA	NA	NA	NA	NA
2020/06/22 8:42:14 PM GMT+1	Cat	NA	NA	NA	NA	NA	NA	NA	NA	NA	NA	NA	NA	NA	NA	NA	NA	NA	NA	NA	NA	NA	NA	NA	NA	NA	NA	NA	NA	NA	NA	NA	NA	NA	NA	NA	NA	Small (below 4kg)	3	16	Yes	To prevent fleas (or other pests)	Yes	Stronghold	Stronghold	Stronghold	6	From a veterinary practice	No
2020/06/22 8:43:35 PM GMT+1	Cat	NA	NA	NA	NA	NA	NA	NA	NA	NA	NA	NA	NA	NA	NA	NA	NA	NA	NA	NA	NA	NA	NA	NA	NA	NA	NA	NA	NA	NA	NA	NA	NA	NA	NA	NA	NA	Large (above 4 kg)	NA	17	Yes	To prevent fleas (or other pests)	No	NA	Bravecto	Bravecto	4	From a veterinary practice	Don't know
2020/06/22 8:44:22 PM GMT+1	Cat	NA	NA	NA	NA	NA	NA	NA	NA	NA	NA	NA	NA	NA	NA	NA	NA	NA	NA	NA	NA	NA	NA	NA	NA	NA	NA	NA	NA	NA	NA	NA	NA	NA	NA	NA	NA	Small (below 4kg)	NA	2	Yes	To prevent fleas (or other pests)	No	NA	Broadline	Broadline	3	Online	Yes
2020/06/22 8:45:48 PM GMT+1	Dog	Medium (10-20 kg)	12.5	2	Yes	To prevent fleas (or other pests)	No	NA	Advantix	Advantix	12	From a veterinary practice	Yes	NA	Yes	No	Yes	No	NA	No	NA	5	In their own bed	In their own bed	Every 3 months	Every day	Every 3 months	Outdoors	Every 3 months	1 hour	3 hours	Mainly on unpaved surfaces like field margins, forest tracks or the beach	Yes, I walk my dog even if it is raining heavily and my dog gets completely wet	8	Bag and bin (specific dog poo bin);Straight in a bin (of any kind)	Bag and bin (specific dog poo bin)	No	NA	NA	NA	NA	NA	NA	NA	NA	NA	NA	NA	NA
2020/06/22 8:45:55 PM GMT+1	Cat	NA	NA	NA	NA	NA	NA	NA	NA	NA	NA	NA	NA	NA	NA	NA	NA	NA	NA	NA	NA	NA	NA	NA	NA	NA	NA	NA	NA	NA	NA	NA	NA	NA	NA	NA	NA	Large (above 4 kg)	5	3	Yes	To prevent fleas (or other pests)	No	NA	Advantage;Frontline or Frontline Combo	Advantage	12	Online	Yes
2020/06/22 8:46:09 PM GMT+1	Dog	Medium (10-20 kg)	13	6	Yes	To prevent fleas (or other pests)	No	NA	Advocate	Advocate	12	From a veterinary practice	Yes	Yes	Yes	No	No	No	NA	No	NA	4	On the furniture	On the furniture	Every month	Every day	Every month	At the groomers	Every month	30 minutes	2 hours	An equal mixture of the above	Yes, I will walk my dog in light drizzle	10	Bag and bin (specific dog poo bin)	Bag and bin (specific dog poo bin)	No	NA	NA	NA	NA	NA	NA	NA	NA	NA	NA	NA	NA
2020/06/22 8:50:05 PM GMT+1	Dog	Medium (10-20 kg)	16.5	15	Yes	To prevent fleas (or other pests)	No	NA	Advantix;Bravecto tablet	Bravecto tablet	4	From a veterinary practice	NA	NA	NA	No	No	No	NA	No	NA	4	In their own bed;On the floor	On the floor	Every 3 months	Every day	Every 3 months	In a bath, sink or shower	Every month	1 hour	1 hour	An equal mixture of the above	Yes, I walk my dog even if it is raining heavily and my dog gets completely wet	10	Bag and bin (specific dog poo bin);Bag and bin (home council bin);Straight in a bin (of any kind);Flush down the toilet	Bag and bin (home council bin)	No	NA	NA	NA	NA	NA	NA	NA	NA	NA	NA	NA	NA
2020/06/22 8:50:26 PM GMT+1	Dog	Medium (10-20 kg)	17.5	9	Yes	To prevent fleas (or other pests)	No	NA	Advocate	Advocate	2	From a veterinary practice	Yes	Yes	Yes	No	No	No	NA	No	NA	2	In their own bed;On the furniture;On the floor	In their own bed	Every 6 months	Every 2 days	Every 6 months	In a bath, sink or shower	Every 6 months	30 minutes	2 hours	Mainly on paved surfaces	Occasionally, but I try to avoid this	10	Bag and bin (specific dog poo bin)	Bag and bin (specific dog poo bin)	No	NA	NA	NA	NA	NA	NA	NA	NA	NA	NA	NA	NA
2020/06/22 8:52:03 PM GMT+1	Cat	NA	NA	NA	NA	NA	NA	NA	NA	NA	NA	NA	NA	NA	NA	NA	NA	NA	NA	NA	NA	NA	NA	NA	NA	NA	NA	NA	NA	NA	NA	NA	NA	NA	NA	NA	NA	Small (below 4kg)	3.8	2	Yes	To prevent fleas (or other pests)	No	NA	Bravecto	Bravecto	4	From a veterinary practice	Yes
2020/06/22 8:54:23 PM GMT+1	Cat	NA	NA	NA	NA	NA	NA	NA	NA	NA	NA	NA	NA	NA	NA	NA	NA	NA	NA	NA	NA	NA	NA	NA	NA	NA	NA	NA	NA	NA	NA	NA	NA	NA	NA	NA	NA	Small (below 4kg)	3	14	Yes	To prevent fleas (or other pests)	No	NA	Broadline	Broadline	4	From a veterinary practice	No
2020/06/22 8:56:07 PM GMT+1	Cat	NA	NA	NA	NA	NA	NA	NA	NA	NA	NA	NA	NA	NA	NA	NA	NA	NA	NA	NA	NA	NA	NA	NA	NA	NA	NA	NA	NA	NA	NA	NA	NA	NA	NA	NA	NA	Small (below 4kg)	4.2	3	Yes	To prevent fleas (or other pests)	No	NA	Frontline or Frontline Combo	Frontline or Frontline Combo	12	From a petshop	NA
2020/06/22 8:56:16 PM GMT+1	Cat	NA	NA	NA	NA	NA	NA	NA	NA	NA	NA	NA	NA	NA	NA	NA	NA	NA	NA	NA	NA	NA	NA	NA	NA	NA	NA	NA	NA	NA	NA	NA	NA	NA	NA	NA	NA	Large (above 4 kg)	5	14	Yes	To prevent fleas (or other pests)	No	NA	Advocate	Advocate	6	From a veterinary practice	No
2020/06/22 8:57:40 PM GMT+1	Cat	NA	NA	NA	NA	NA	NA	NA	NA	NA	NA	NA	NA	NA	NA	NA	NA	NA	NA	NA	NA	NA	NA	NA	NA	NA	NA	NA	NA	NA	NA	NA	NA	NA	NA	NA	NA	Large (above 4 kg)	5.6	6	Yes	To prevent fleas (or other pests)	No	NA	Bravecto	Bravecto	4	From a veterinary practice	No
2020/06/22 9:02:31 PM GMT+1	Cat	NA	NA	NA	NA	NA	NA	NA	NA	NA	NA	NA	NA	NA	NA	NA	NA	NA	NA	NA	NA	NA	NA	NA	NA	NA	NA	NA	NA	NA	NA	NA	NA	NA	NA	NA	NA	Large (above 4 kg)	4.5	4	Yes	To prevent fleas (or other pests)	No	NA	Advocate;Frontline or Frontline Combo	Frontline or Frontline Combo	9	Online	Yes
2020/06/22 9:03:30 PM GMT+1	Dog	Small (4-10kg)	5	1	Yes	To prevent fleas (or other pests)	No	NA	Don't know	Don't know	1	From a veterinary practice	Yes	No	NA	No	No	No	NA	No	NA	1	In their own bed;On the furniture;On a family member's bed;On the floor	On the furniture	Every month	Every day	Every month	At the groomers	Less than once a year	1 hour	2 hours	Mainly on unpaved surfaces like field margins, forest tracks or the beach	Occasionally, but I try to avoid this	4	Bag and bin (home council bin)	Bag and bin (home council bin)	No	NA	NA	NA	NA	NA	NA	NA	NA	NA	NA	NA	NA
2020/06/22 9:03:32 PM GMT+1	Dog	Large (20-40kg)	21	6	Yes	In response to other pests (eg ticks)	No	NA	NexGard Spectra	NexGard Spectra	12	From a veterinary practice	NA	NA	NA	No	No	No	NA	No	NA	2	In their own bed;On the furniture;In a crate	On the furniture	Every 3 months	Every day	Every 6 months	Outdoors	Every 3 months	1 hour	2 hours	Mainly on unpaved surfaces like field margins, forest tracks or the beach	Yes, I will walk my dog in light drizzle	5	None of the above/don't know	None of the above/don't know	No	NA	NA	NA	NA	NA	NA	NA	NA	NA	NA	NA	NA
2020/06/22 9:05:30 PM GMT+1	Cat	NA	NA	NA	NA	NA	NA	NA	NA	NA	NA	NA	NA	NA	NA	NA	NA	NA	NA	NA	NA	NA	NA	NA	NA	NA	NA	NA	NA	NA	NA	NA	NA	NA	NA	NA	NA	Large (above 4 kg)	4.3	1	Yes	To prevent fleas (or other pests)	No	NA	Bob Martin Clear / Clear Plus (Fipronil)	Bob Martin Clear / Clear Plus (Fipronil)	2	From a petshop	Yes
2020/06/22 9:05:41 PM GMT+1	Dog	Large (20-40kg)	NA	2	Yes	To prevent fleas (or other pests)	Yes	Seresto collar	Seresto collar	Seresto collar	2	From a petshop	NA	NA	NA	NA	No	No	NA	Yes	January;February;March;April;May;June	1	In their own bed;On the furniture;On the floor	On the furniture	Every month	Every day	Every week or more	Outdoors	Every week or more	3 hours	3 hours	Mainly on unpaved surfaces like field margins, forest tracks or the beach	Yes, I walk my dog even if it is raining heavily and my dog gets completely wet	10	Bag and bin (specific dog poo bin);Bag and bin (home council bin)	Bag and bin (specific dog poo bin)	No	NA	NA	NA	NA	NA	NA	NA	NA	NA	NA	NA	NA
2020/06/22 9:08:02 PM GMT+1	Cat	NA	NA	NA	NA	NA	NA	NA	NA	NA	NA	NA	NA	NA	NA	NA	NA	NA	NA	NA	NA	NA	NA	NA	NA	NA	NA	NA	NA	NA	NA	NA	NA	NA	NA	NA	NA	Small (below 4kg)	3.5	12	Yes	To prevent fleas (or other pests)	No	NA	Stronghold	Stronghold	11	From a veterinary practice	Yes
2020/06/22 9:11:52 PM GMT+1	Dog	Medium (10-20 kg)	15	14	Yes	To prevent fleas (or other pests)	No	NA	Bravecto tablet	Bravecto tablet	1	From a veterinary practice	NA	NA	NA	No	No	No	NA	No	NA	1	In their own bed;On the furniture;On a family member's bed;On the floor	On the furniture	Every month	Every day	Every week or more	Outdoors	Every week or more	30 minutes	1 hour	Mainly on unpaved surfaces like field margins, forest tracks or the beach	Yes, I will walk my dog in light drizzle	5	Bag and bin (specific dog poo bin)	None of the above/don't know	No	NA	NA	NA	NA	NA	NA	NA	NA	NA	NA	NA	NA
2020/06/22 9:12:06 PM GMT+1	Dog	Medium (10-20 kg)	19.5	1	No	NA	NA	NA	NA	NA	NA	NA	NA	NA	NA	NA	No	No	NA	No	NA	3	In their own bed;On the furniture;On a family member's bed;On the floor	On a family member's bed	Every week or more	Every day	Once a year	In a bath, sink or shower	Never	30 minutes	3 hours	Mainly on paved surfaces	Yes, I walk my dog even if it is raining heavily and my dog gets completely wet	10	Bag and bin (home council bin)	Bag and bin (home council bin)	No	NA	NA	NA	NA	NA	NA	NA	NA	NA	NA	NA	NA
2020/06/22 9:14:11 PM GMT+1	Cat	NA	NA	NA	NA	NA	NA	NA	NA	NA	NA	NA	NA	NA	NA	NA	NA	NA	NA	NA	NA	NA	NA	NA	NA	NA	NA	NA	NA	NA	NA	NA	NA	NA	NA	NA	NA	Large (above 4 kg)	5	12	No	NA	NA	NA	NA	NA	NA	NA	NA
2020/06/22 9:15:42 PM GMT+1	Cat	NA	NA	NA	NA	NA	NA	NA	NA	NA	NA	NA	NA	NA	NA	NA	NA	NA	NA	NA	NA	NA	NA	NA	NA	NA	NA	NA	NA	NA	NA	NA	NA	NA	NA	NA	NA	Large (above 4 kg)	4.68	11	Yes	To prevent fleas (or other pests)	No	NA	Advocate	Advocate	12	Online	Yes
2020/06/22 9:17:52 PM GMT+1	Dog	Medium (10-20 kg)	17	5	Yes	To prevent fleas (or other pests)	No	NA	Advantix;Bravecto tablet;Stronghold	Stronghold	11	From a veterinary practice	Yes	Yes	Yes	No	No	No	NA	No	NA	3	On a family member's bed	On the furniture	Every month	Every day	Every month	At the groomers	Every 2 weeks	3 hours	3 hours	Mainly on unpaved surfaces like field margins, forest tracks or the beach	Yes, I walk my dog even if it is raining heavily and my dog gets completely wet	8	Bag and bin (specific dog poo bin);Bag and bin (home council bin)	Bag and bin (home council bin)	No	NA	NA	NA	NA	NA	NA	NA	NA	NA	NA	NA	NA
2020/06/22 9:18:20 PM GMT+1	Dog	Large (20-40kg)	21	3	Yes	To prevent fleas (or other pests)	No	NA	Bravecto tablet;Comfortis;NexGard Spectra	Bravecto tablet	6	From a veterinary practice	NA	NA	NA	No	No	No	NA	No	NA	5	In their own bed;On the furniture;On a family member's bed;On the floor	On the furniture	Every 2 weeks	Every day	Every 3 months	In a bath, sink or shower	Every 2 weeks	1 hour	2 hours	An equal mixture of the above	Yes, I will walk my dog in light drizzle	5	Bag and bin (specific dog poo bin);Bag and bin (home council bin);Straight in a bin (of any kind)	Bag and bin (home council bin)	No	NA	NA	NA	NA	NA	NA	NA	NA	NA	NA	NA	NA
2020/06/22 9:18:59 PM GMT+1	Dog	Medium (10-20 kg)	10.2	5	Yes	To prevent fleas (or other pests)	No	NA	Advocate	Advocate	7	From a veterinary practice	Yes	Yes	Yes	No	Yes	No	NA	Yes	April;May;June;July;August;September;October	2	In their own bed;On the furniture;On a family member's bed;On the floor;In a crate	On the furniture	Every 6 months	Every day	Every week or more	Outdoors	Every week or more	1 hour	2 hours	Mainly on unpaved surfaces like field margins, forest tracks or the beach	Yes, I will walk my dog in light drizzle	0	Bag and bin (specific dog poo bin);None of the above/don't know	None of the above/don't know	Yes	NA	NA	NA	NA	NA	NA	NA	NA	NA	NA	NA	NA
2020/06/22 9:19:48 PM GMT+1	Dog	Medium (10-20 kg)	10.5	7	Yes	To prevent fleas (or other pests)	No	NA	Advocate	Advocate	12	From a veterinary practice	Yes	Yes	Yes	No	No	No	NA	No	NA	2	On a family member's bed	On a family member's bed	Every week or more	Every day	Every month	In a bath, sink or shower	Every month	30 minutes	3 hours	An equal mixture of the above	Yes, I will walk my dog in light drizzle	10	Bag and bin (specific dog poo bin);Bag and bin (home council bin)	Bag and bin (home council bin)	No	NA	NA	NA	NA	NA	NA	NA	NA	NA	NA	NA	NA
2020/06/22 9:20:35 PM GMT+1	Dog	Medium (10-20 kg)	12	5	Yes	To prevent fleas (or other pests)	No	NA	Easecto	Easecto	12	From a veterinary practice	NA	NA	NA	Maybe	No	No	NA	Yes	January;February;March;April;May;June;July;August;September;October;November;December	12	In their own bed;On the furniture;On the floor;In a crate	In a crate	Every week or more	Every day	Every week or more	In a bath, sink or shower	Every 6 months	1 hour	2 hours	Mainly on unpaved surfaces like field margins, forest tracks or the beach	Occasionally, but I try to avoid this	10	Bag and bin (specific dog poo bin);Bag and bin (home council bin)	Bag and bin (home council bin)	No	NA	NA	NA	NA	NA	NA	NA	NA	NA	NA	NA	NA
2020/06/22 9:21:00 PM GMT+1	Cat	NA	NA	NA	NA	NA	NA	NA	NA	NA	NA	NA	NA	NA	NA	NA	NA	NA	NA	NA	NA	NA	NA	NA	NA	NA	NA	NA	NA	NA	NA	NA	NA	NA	NA	NA	NA	Small (below 4kg)	NA	17	Yes	To prevent fleas (or other pests)	No	NA	Advocate	Advocate	2	From a veterinary practice	Yes
2020/06/22 9:23:09 PM GMT+1	Dog	Medium (10-20 kg)	18	9	Yes	In response to other pests (eg ticks)	No	NA	Seresto collar	Seresto collar	2	From a veterinary practice	NA	Yes	Yes	No	No	No	NA	No	NA	4	In their own bed;On the floor	In their own bed	Every 3 months	Every 2 days	Less than once a year	In a bath, sink or shower	Every week or more	1 hour	3 hours	Mainly on unpaved surfaces like field margins, forest tracks or the beach	Yes, I will walk my dog in light drizzle	8	Bag and bin (specific dog poo bin);Bag and bin (home council bin);Straight in a bin (of any kind);Bury in the ground;None of the above/don't know	Bag and bin (specific dog poo bin)	No	NA	NA	NA	NA	NA	NA	NA	NA	NA	NA	NA	NA
2020/06/22 9:23:12 PM GMT+1	Cat	NA	NA	NA	NA	NA	NA	NA	NA	NA	NA	NA	NA	NA	NA	NA	NA	NA	NA	NA	NA	NA	NA	NA	NA	NA	NA	NA	NA	NA	NA	NA	NA	NA	NA	NA	NA	Large (above 4 kg)	4.2	6	Yes	To prevent fleas (or other pests)	No	NA	Bravecto;Stronghold	Bravecto	8	From a veterinary practice	Yes
2020/06/22 9:23:57 PM GMT+1	Cat	NA	NA	NA	NA	NA	NA	NA	NA	NA	NA	NA	NA	NA	NA	NA	NA	NA	NA	NA	NA	NA	NA	NA	NA	NA	NA	NA	NA	NA	NA	NA	NA	NA	NA	NA	NA	Large (above 4 kg)	6	13	Yes	To prevent fleas (or other pests)	No	NA	Advocate;Program injection	Program injection	4	From a veterinary practice	No
2020/06/22 9:24:00 PM GMT+1	Cat	NA	NA	NA	NA	NA	NA	NA	NA	NA	NA	NA	NA	NA	NA	NA	NA	NA	NA	NA	NA	NA	NA	NA	NA	NA	NA	NA	NA	NA	NA	NA	NA	NA	NA	NA	NA	Small (below 4kg)	4	10	Yes	To prevent fleas (or other pests)	No	NA	Don't know	Don't know	2	From a veterinary practice	Yes
2020/06/22 9:24:41 PM GMT+1	Cat	NA	NA	NA	NA	NA	NA	NA	NA	NA	NA	NA	NA	NA	NA	NA	NA	NA	NA	NA	NA	NA	NA	NA	NA	NA	NA	NA	NA	NA	NA	NA	NA	NA	NA	NA	NA	Small (below 4kg)	NA	20	Yes	To prevent fleas (or other pests)	No	NA	Fipnil/Fipralone/Fiprene/ Fiprex/ Fiproclear/Fiprofile/Fipronil/Fiprotec/Fiproxole/Fleanil/Fleascreen/Flevox/Flick/Fyperix	Frontline generic	1	From a petshop	No
2020/06/22 9:24:42 PM GMT+1	Cat	NA	NA	NA	NA	NA	NA	NA	NA	NA	NA	NA	NA	NA	NA	NA	NA	NA	NA	NA	NA	NA	NA	NA	NA	NA	NA	NA	NA	NA	NA	NA	NA	NA	NA	NA	NA	Large (above 4 kg)	NA	12	Yes	To prevent fleas (or other pests)	Don't know	NA	Don't know	Don't know	2	From a veterinary practice	NA
2020/06/22 9:24:42 PM GMT+1	Cat	NA	NA	NA	NA	NA	NA	NA	NA	NA	NA	NA	NA	NA	NA	NA	NA	NA	NA	NA	NA	NA	NA	NA	NA	NA	NA	NA	NA	NA	NA	NA	NA	NA	NA	NA	NA	Small (below 4kg)	4	2	Yes	To prevent fleas (or other pests)	No	NA	Advantage;Fipnil/Fipralone/Fiprene/ Fiprex/ Fiproclear/Fiprofile/Fipronil/Fiprotec/Fiproxole/Fleanil/Fleascreen/Flevox/Flick/Fyperix;Johnsons 4Fleas tablets	Advantage	6	Online	Yes
2020/06/22 9:24:51 PM GMT+1	Dog	Large (20-40kg)	27	2	Yes	To prevent fleas (or other pests)	No	NA	NexGard Spectra;Prinovox	NexGard Spectra	12	From a veterinary practice	NA	NA	NA	No	No	No	NA	No	NA	12	In their own bed;On a family member's bed	On a family member's bed	Don't know	Every day	Every week or more	In a bath, sink or shower	Every 2 weeks	2 hours	3 hours	An equal mixture of the above	Yes, I walk my dog even if it is raining heavily and my dog gets completely wet	8	Bag and bin (specific dog poo bin);Bag and bin (home council bin)	Bag and bin (specific dog poo bin)	Yes	NA	NA	NA	NA	NA	NA	NA	NA	NA	NA	NA	NA
2020/06/22 9:25:46 PM GMT+1	Dog	Medium (10-20 kg)	20	6	No	NA	NA	NA	NA	NA	NA	NA	NA	NA	NA	NA	No	No	NA	No	NA	3	On the furniture;On the floor	In their own bed	Every month	Every day	Every month	In a bath, sink or shower	Every 3 months	30 minutes	2 hours	An equal mixture of the above	Occasionally, but I try to avoid this	10	Bag and bin (specific dog poo bin)	Bag and bin (specific dog poo bin)	Yes	NA	NA	NA	NA	NA	NA	NA	NA	NA	NA	NA	NA
2020/06/22 9:27:56 PM GMT+1	Cat	NA	NA	NA	NA	NA	NA	NA	NA	NA	NA	NA	NA	NA	NA	NA	NA	NA	NA	NA	NA	NA	NA	NA	NA	NA	NA	NA	NA	NA	NA	NA	NA	NA	NA	NA	NA	Large (above 4 kg)	5.1	5	Yes	To prevent fleas (or other pests)	No	NA	Stronghold Plus	Stronghold Plus	12	From a veterinary practice	Yes
2020/06/22 9:30:31 PM GMT+1	Cat	NA	NA	NA	NA	NA	NA	NA	NA	NA	NA	NA	NA	NA	NA	NA	NA	NA	NA	NA	NA	NA	NA	NA	NA	NA	NA	NA	NA	NA	NA	NA	NA	NA	NA	NA	NA	Large (above 4 kg)	5	1	Yes	To prevent fleas (or other pests)	No	NA	Bravecto;Credelio;Stronghold	Bravecto	4	From a veterinary practice	Yes
2020/06/22 9:30:36 PM GMT+1	Cat	NA	NA	NA	NA	NA	NA	NA	NA	NA	NA	NA	NA	NA	NA	NA	NA	NA	NA	NA	NA	NA	NA	NA	NA	NA	NA	NA	NA	NA	NA	NA	NA	NA	NA	NA	NA	Large (above 4 kg)	6	5	Yes	To prevent fleas (or other pests)	No	NA	Bravecto	Bravecto	3	From a veterinary practice	Yes
2020/06/22 9:31:07 PM GMT+1	Dog	Medium (10-20 kg)	NA	6	Yes	In response to other pests (eg ticks)	No	NA	Bravecto tablet	Bravecto tablet	3	From a veterinary practice	NA	NA	NA	No	No	No	NA	Yes	May;June;September;October	4	In their own bed	On the furniture	Every week or more	Every day	Every 6 months	At the groomers	Every 6 months	2 hours	3 hours	Mainly on unpaved surfaces like field margins, forest tracks or the beach	Yes, I walk my dog even if it is raining heavily and my dog gets completely wet	6	Bag and bin (specific dog poo bin);Bag and bin (home council bin)	Bag and bin (home council bin)	Yes	NA	NA	NA	NA	NA	NA	NA	NA	NA	NA	NA	NA
2020/06/22 9:31:54 PM GMT+1	Dog	Extra large (over 40 kg)	45	12	No	NA	NA	NA	NA	NA	NA	NA	NA	NA	NA	NA	No	No	NA	Yes	Don't know	None	In their own bed;On the furniture;On a family member's bed;On the floor	On a family member's bed	Less than once a year	Every day	Never	NA	Never	My dog doesn't go for walks	3 hours	NA	NA	10	Bag and bin (specific dog poo bin);Bag and bin (home council bin)	Bag and bin (home council bin)	No	NA	NA	NA	NA	NA	NA	NA	NA	NA	NA	NA	NA
2020/06/22 9:33:31 PM GMT+1	Dog	Large (20-40kg)	21.6	2	Yes	To prevent fleas (or other pests)	No	NA	Bravecto tablet	Bravecto tablet	4	From a veterinary practice	NA	NA	NA	No	No	No	NA	Yes	June	12	In their own bed;On a family member's bed;On the floor	In their own bed	Every 2 weeks	Every day	Every 6 months	In a bath, sink or shower	Never	3 hours	6 hours	Mainly on unpaved surfaces like field margins, forest tracks or the beach	Yes, I walk my dog even if it is raining heavily and my dog gets completely wet	5	Bag and bin (specific dog poo bin);Bag and bin (home council bin);Straight in a bin (of any kind)	Bag and bin (specific dog poo bin)	No	NA	NA	NA	NA	NA	NA	NA	NA	NA	NA	NA	NA
2020/06/22 9:38:16 PM GMT+1	Dog	Medium (10-20 kg)	14	9	No	NA	NA	NA	NA	NA	NA	NA	NA	NA	NA	NA	No	No	NA	No	NA	None	On the floor	On the floor	Every week or more	Every day	Every month	In a bath, sink or shower	Every week or more	1 hour	2 hours	Mainly on unpaved surfaces like field margins, forest tracks or the beach	Occasionally, but I try to avoid this	10	Bag and bin (home council bin)	Bag and bin (home council bin)	No	NA	NA	NA	NA	NA	NA	NA	NA	NA	NA	NA	NA
2020/06/22 9:38:35 PM GMT+1	Cat	NA	NA	NA	NA	NA	NA	NA	NA	NA	NA	NA	NA	NA	NA	NA	NA	NA	NA	NA	NA	NA	NA	NA	NA	NA	NA	NA	NA	NA	NA	NA	NA	NA	NA	NA	NA	Large (above 4 kg)	4	12	Yes	To prevent fleas (or other pests)	No	NA	Advantage;Bravecto;Frontline or Frontline Combo	Advantage	6	From a veterinary practice	Yes
2020/06/22 9:39:02 PM GMT+1	Dog	Small (4-10kg)	4.6	10	Yes	To prevent fleas (or other pests)	No	NA	Prinovox	Prinovox	12	From a veterinary practice	Yes	Yes	Yes	No	Yes	Yes	April	No	NA	None	On a family member's bed	On a family member's bed	Every 2 weeks	Every day	Every month	In a bath, sink or shower	Never	2 hours	3 hours	Mainly on unpaved surfaces like field margins, forest tracks or the beach	Occasionally, but I try to avoid this	10	Bag and bin (specific dog poo bin);Bag and bin (home council bin)	Bag and bin (home council bin)	No	NA	NA	NA	NA	NA	NA	NA	NA	NA	NA	NA	NA
2020/06/22 9:39:20 PM GMT+1	Dog	Medium (10-20 kg)	14	6	No	NA	NA	NA	NA	NA	NA	NA	NA	NA	NA	NA	No	No	NA	No	NA	1	In their own bed;On the furniture;On a family member's bed	On the furniture	Every week or more	Every day	Every 3 months	In a bath, sink or shower	Never	1 hour	2 hours	An equal mixture of the above	Yes, I walk my dog even if it is raining heavily and my dog gets completely wet	9	Bag and bin (specific dog poo bin);Bag and bin (home council bin)	Bag and bin (home council bin)	No	NA	NA	NA	NA	NA	NA	NA	NA	NA	NA	NA	NA
2020/06/22 9:40:37 PM GMT+1	Dog	Medium (10-20 kg)	11	7	Yes	To prevent fleas (or other pests)	No	NA	Bravecto tablet	Bravecto tablet	2	From a veterinary practice	NA	NA	NA	No	No	No	NA	No	NA	3	In their own bed	In their own bed	Every month	Every day	Every week or more	At the groomers	Every week or more	2 hours	6 hours	Mainly on unpaved surfaces like field margins, forest tracks or the beach	Yes, I walk my dog even if it is raining heavily and my dog gets completely wet	10	Bag and bin (specific dog poo bin);Bag and bin (home council bin);Straight in a bin (of any kind)	Straight in a bin (of any kind)	No	NA	NA	NA	NA	NA	NA	NA	NA	NA	NA	NA	NA
2020/06/22 9:40:39 PM GMT+1	Dog	Miniature (< 4 kg)	4	7	Yes	To prevent fleas (or other pests)	Yes	Botanic oil	Advantage	Advantage	11	Online	Yes	Yes	Yes	No	Yes	Yes	May	No	NA	9	On a family member's bed	On a family member's bed	Every 2 weeks	Every day	Every month	In a bath, sink or shower	Once a year	2 hours	3 hours	An equal mixture of the above	Yes, I will walk my dog in light drizzle	10	Bag and bin (specific dog poo bin)	Bag and bin (specific dog poo bin)	No	NA	NA	NA	NA	NA	NA	NA	NA	NA	NA	NA	NA
2020/06/22 9:42:40 PM GMT+1	Dog	Large (20-40kg)	36	4	No	NA	NA	NA	NA	NA	NA	NA	NA	NA	NA	NA	No	No	NA	No	NA	3	On a family member's bed	On a family member's bed	Every week or more	Every day	Every month	In a bath, sink or shower	Never	2 hours	3 hours	Mainly on unpaved surfaces like field margins, forest tracks or the beach	Yes, I walk my dog even if it is raining heavily and my dog gets completely wet	8	Bag and bin (specific dog poo bin);Bag and bin (home council bin)	Bag and bin (home council bin)	No	NA	NA	NA	NA	NA	NA	NA	NA	NA	NA	NA	NA
2020/06/22 9:43:05 PM GMT+1	Dog	Medium (10-20 kg)	18	12	Yes	In response to other pests (eg ticks)	No	NA	Advantage	Advantage	2	Online	No	No	NA	No	Yes	No	NA	No	NA	3	In their own bed;On the furniture;On the floor	In their own bed	Every week or more	Every day	Less than once a year	Outdoors	Never	1 hour	3 hours	Mainly on unpaved surfaces like field margins, forest tracks or the beach	Occasionally, but I try to avoid this	9	Bag and bin (specific dog poo bin);Bag and bin (home council bin);Straight in a bin (of any kind)	Straight in a bin (of any kind)	No	NA	NA	NA	NA	NA	NA	NA	NA	NA	NA	NA	NA
2020/06/22 9:43:12 PM GMT+1	Dog	Small (4-10kg)	7.5	2	Yes	To prevent fleas (or other pests)	No	NA	Seresto collar	Seresto collar	2	From a veterinary practice	NA	Yes	Yes	No	No	No	NA	No	NA	4	On a family member's bed	On a family member's bed	Every week or more	Every day	Less than once a year	NA	Less than once a year	1 hour	2 hours	Mainly on unpaved surfaces like field margins, forest tracks or the beach	Yes, I walk my dog even if it is raining heavily and my dog gets completely wet	8	Bag and bin (specific dog poo bin);Bag and bin (home council bin);Straight in a bin (of any kind)	Bag and bin (home council bin)	No	NA	NA	NA	NA	NA	NA	NA	NA	NA	NA	NA	NA
2020/06/22 9:43:22 PM GMT+1	Cat	NA	NA	NA	NA	NA	NA	NA	NA	NA	NA	NA	NA	NA	NA	NA	NA	NA	NA	NA	NA	NA	NA	NA	NA	NA	NA	NA	NA	NA	NA	NA	NA	NA	NA	NA	NA	Large (above 4 kg)	NA	7	Yes	To prevent fleas (or other pests)	No	NA	Advocate;Frontline or Frontline Combo	Frontline or Frontline Combo	7	Online	No
2020/06/22 9:43:41 PM GMT+1	Dog	Large (20-40kg)	26	2	Yes	In response to a flea infestation	Yes	Citronella	Advocate	Advocate	9	From a veterinary practice	Don't know	NA	NA	No	Yes	Yes	September	Yes	April	4	On the furniture	On the furniture	Every month	Every day	Every month	In a bath, sink or shower	Every 2 weeks	2 hours	2 hours	Mainly on unpaved surfaces like field margins, forest tracks or the beach	Yes, I walk my dog even if it is raining heavily and my dog gets completely wet	10	Bag and bin (specific dog poo bin)	Bag and bin (specific dog poo bin)	No	NA	NA	NA	NA	NA	NA	NA	NA	NA	NA	NA	NA
2020/06/22 9:43:41 PM GMT+1	Dog	Medium (10-20 kg)	NA	4	Yes	To prevent fleas (or other pests)	No	NA	Advocate	Advocate	3	From a veterinary practice	NA	NA	NA	Maybe	Yes	No	NA	No	NA	3	In their own bed;On the furniture;On the floor	On the furniture	Every month	Every day	Every month	In a bath, sink or shower	Every 6 months	2 hours	3 hours	An equal mixture of the above	Yes, I walk my dog even if it is raining heavily and my dog gets completely wet	10	Bag and bin (specific dog poo bin)	Bag and bin (specific dog poo bin)	No	NA	NA	NA	NA	NA	NA	NA	NA	NA	NA	NA	NA
2020/06/22 9:45:10 PM GMT+1	Dog	Small (4-10kg)	6.6	8	Yes	To prevent fleas (or other pests)	No	NA	Stronghold	Stronghold	12	From a veterinary practice	Yes	Yes	Yes	No	No	No	NA	No	NA	12	On a family member's bed	On a family member's bed	Every week or more	Every day	Every 3 months	In a bath, sink or shower	Less than once a year	30 minutes	2 hours	An equal mixture of the above	Occasionally, but I try to avoid this	10	Bag and bin (specific dog poo bin);Bag and bin (home council bin)	Bag and bin (home council bin)	No	NA	NA	NA	NA	NA	NA	NA	NA	NA	NA	NA	NA
2020/06/22 9:45:36 PM GMT+1	Cat	NA	NA	NA	NA	NA	NA	NA	NA	NA	NA	NA	NA	NA	NA	NA	NA	NA	NA	NA	NA	NA	NA	NA	NA	NA	NA	NA	NA	NA	NA	NA	NA	NA	NA	NA	NA	Large (above 4 kg)	NA	4	Yes	To prevent fleas (or other pests)	No	NA	Advocate;Frontline or Frontline Combo	Advocate	9	Online	Yes
2020/06/22 9:45:59 PM GMT+1	Dog	Medium (10-20 kg)	11	5	Yes	To prevent fleas (or other pests)	Yes	Garlic drops	Bravecto tablet	Bravecto tablet	4	From a veterinary practice	NA	NA	NA	No	Yes	No	NA	Yes	June	4	On the furniture;In a crate	On the furniture	Every 2 weeks	Every day	Every 3 months	At the groomers	Never	1 hour	2 hours	An equal mixture of the above	Yes, I will walk my dog in light drizzle	10	Bag and bin (home council bin)	Bag and bin (home council bin)	No	NA	NA	NA	NA	NA	NA	NA	NA	NA	NA	NA	NA
2020/06/22 9:48:53 PM GMT+1	Cat	NA	NA	NA	NA	NA	NA	NA	NA	NA	NA	NA	NA	NA	NA	NA	NA	NA	NA	NA	NA	NA	NA	NA	NA	NA	NA	NA	NA	NA	NA	NA	NA	NA	NA	NA	NA	Large (above 4 kg)	NA	2	Yes	To prevent fleas (or other pests)	No	NA	Advocate;Prinovox	Advocate	10	From a veterinary practice	Yes
2020/06/22 9:49:06 PM GMT+1	Dog	Large (20-40kg)	22	12	Yes	To prevent fleas (or other pests)	No	NA	Advocate;Bravecto tablet;NexGard Spectra;Seresto collar	NexGard Spectra	4	From a veterinary practice	Yes	Yes	Yes	No	Yes	Yes	April;May;June	Yes	May	3	In their own bed;On the furniture;On a family member's bed;On the floor	On a family member's bed	Every month	Every day	Every 3 months	In a bath, sink or shower	Every week or more	1 hour	3 hours	Mainly on unpaved surfaces like field margins, forest tracks or the beach	Yes, I walk my dog even if it is raining heavily and my dog gets completely wet	8	Bag and bin (specific dog poo bin)	Bury in the ground	No	NA	NA	NA	NA	NA	NA	NA	NA	NA	NA	NA	NA
2020/06/22 9:49:17 PM GMT+1	Dog	Medium (10-20 kg)	10.5	6	No	NA	NA	NA	NA	NA	NA	NA	NA	NA	NA	NA	No	No	NA	No	NA	1	On the furniture	On the furniture	Never	Every day	Every 3 months	In a bath, sink or shower	Every week or more	2 hours	3 hours	Mainly on unpaved surfaces like field margins, forest tracks or the beach	Yes, I walk my dog even if it is raining heavily and my dog gets completely wet	10	Bag and bin (specific dog poo bin);Bury in the ground	Bury in the ground	No	NA	NA	NA	NA	NA	NA	NA	NA	NA	NA	NA	NA
2020/06/22 9:50:53 PM GMT+1	Dog	Large (20-40kg)	22	4	Yes	To prevent fleas (or other pests)	Yes	Billy No Mates	Billy No Mates	Billy No Mates	12	Online	NA	NA	NA	No	No	No	NA	No	NA	12	On a family member's bed	On a family member's bed	Every 6 months	Every day	Every week or more	Outdoors	Every week or more	2 hours	6 hours	Mainly on unpaved surfaces like field margins, forest tracks or the beach	Yes, I walk my dog even if it is raining heavily and my dog gets completely wet	9	Bag and bin (specific dog poo bin);Bag and bin (home council bin)	Bag and bin (specific dog poo bin)	No	NA	NA	NA	NA	NA	NA	NA	NA	NA	NA	NA	NA
2020/06/22 9:51:34 PM GMT+1	Dog	Medium (10-20 kg)	14	2	Yes	To prevent fleas (or other pests)	No	NA	Don't know	Don't know	1	From a veterinary practice	NA	NA	NA	No	No	No	NA	No	NA	1	In their own bed;In a crate	In a crate	Every month	Every day	Every 3 months	In a bath, sink or shower	Every 3 months	30 minutes	1 hour	An equal mixture of the above	Occasionally, but I try to avoid this	9	Bag and bin (specific dog poo bin);Bag and bin (home council bin)	Bag and bin (home council bin)	No	NA	NA	NA	NA	NA	NA	NA	NA	NA	NA	NA	NA
2020/06/22 9:52:40 PM GMT+1	Dog	Small (4-10kg)	9.6	10	Yes	In response to a flea infestation	Yes	Vets best spot on flea treatment	Credelio;Frontline or Frontline Combo spot on	Credelio	12	From a veterinary practice	Yes	No	NA	No	Yes	Yes	January;February;March;April;May;December	No	NA	4	On the furniture;On a family member's bed	On the furniture	Every 2 weeks	Every day	Every 3 months	In a bath, sink or shower	Every month	1 hour	2 hours	An equal mixture of the above	Never	9	Bag and bin (specific dog poo bin);Straight in a bin (of any kind)	Straight in a bin (of any kind)	No	NA	NA	NA	NA	NA	NA	NA	NA	NA	NA	NA	NA
2020/06/22 9:54:47 PM GMT+1	Cat	NA	NA	NA	NA	NA	NA	NA	NA	NA	NA	NA	NA	NA	NA	NA	NA	NA	NA	NA	NA	NA	NA	NA	NA	NA	NA	NA	NA	NA	NA	NA	NA	NA	NA	NA	NA	Large (above 4 kg)	5	7	Yes	To prevent fleas (or other pests)	No	NA	Broadline	Broadline	12	Online	No
2020/06/22 9:54:55 PM GMT+1	Cat	NA	NA	NA	NA	NA	NA	NA	NA	NA	NA	NA	NA	NA	NA	NA	NA	NA	NA	NA	NA	NA	NA	NA	NA	NA	NA	NA	NA	NA	NA	NA	NA	NA	NA	NA	NA	Large (above 4 kg)	6	5	Yes	To prevent fleas (or other pests)	No	NA	Stronghold	Stronghold	10	From a veterinary practice	Yes
2020/06/22 9:54:57 PM GMT+1	Cat	NA	NA	NA	NA	NA	NA	NA	NA	NA	NA	NA	NA	NA	NA	NA	NA	NA	NA	NA	NA	NA	NA	NA	NA	NA	NA	NA	NA	NA	NA	NA	NA	NA	NA	NA	NA	Large (above 4 kg)	5	4	Yes	To prevent fleas (or other pests)	No	NA	Bravecto;Credelio	Credelio	9	From a veterinary practice	NA
2020/06/22 9:55:12 PM GMT+1	Cat	NA	NA	NA	NA	NA	NA	NA	NA	NA	NA	NA	NA	NA	NA	NA	NA	NA	NA	NA	NA	NA	NA	NA	NA	NA	NA	NA	NA	NA	NA	NA	NA	NA	NA	NA	NA	Small (below 4kg)	3.2	9	Yes	To prevent fleas (or other pests)	No	NA	Fipnil/Fipralone/Fiprene/ Fiprex/ Fiproclear/Fiprofile/Fipronil/Fiprotec/Fiproxole/Fleanil/Fleascreen/Flevox/Flick/Fyperix;Frontline or Frontline Combo	Frontline or Frontline Combo	6	Online	Yes
2020/06/22 9:55:20 PM GMT+1	Dog	Medium (10-20 kg)	14	2	Yes	To prevent fleas (or other pests)	No	NA	Advocate	Advocate	12	From a veterinary practice	Don't know	NA	NA	No	No	No	NA	No	NA	2	In their own bed	In their own bed	Every 2 weeks	Every day	Every month	At the groomers	Never	1 hour	3 hours	Mainly on unpaved surfaces like field margins, forest tracks or the beach	Yes, I will walk my dog in light drizzle	10	Bag and bin (specific dog poo bin);Bag and bin (home council bin)	Bag and bin (specific dog poo bin)	No	NA	NA	NA	NA	NA	NA	NA	NA	NA	NA	NA	NA
2020/06/22 9:56:48 PM GMT+1	Dog	Large (20-40kg)	28	2	Yes	To prevent fleas (or other pests)	No	NA	Advocate;Seresto collar	Advocate	12	From a veterinary practice	Yes	No	No	No	No	No	NA	No	NA	4	In a crate	In a crate	Every 3 months	Every day	Every 3 months	In a bath, sink or shower	Every month	2 hours	2 hours	An equal mixture of the above	Yes, I walk my dog even if it is raining heavily and my dog gets completely wet	10	Bag and bin (specific dog poo bin);Bag and bin (home council bin)	Bag and bin (home council bin)	No	NA	NA	NA	NA	NA	NA	NA	NA	NA	NA	NA	NA
2020/06/22 9:57:43 PM GMT+1	Dog	Large (20-40kg)	37	8	Yes	To prevent fleas (or other pests)	Yes	Dorset?ÇÖs Herbal	Bravecto tablet	Bravecto tablet	4	From a veterinary practice	NA	NA	NA	Maybe	Yes	Yes	May	No	NA	3	In their own bed;On the furniture;On a family member's bed;On the floor	In their own bed	Every month	Every day	Every month	In a bath, sink or shower	Every week or more	30 minutes	1 hour	Mainly on unpaved surfaces like field margins, forest tracks or the beach	Yes, I walk my dog even if it is raining heavily and my dog gets completely wet	10	Bag and bin (specific dog poo bin)	Bag and bin (specific dog poo bin)	No	NA	NA	NA	NA	NA	NA	NA	NA	NA	NA	NA	NA
2020/06/22 9:58:19 PM GMT+1	Dog	Large (20-40kg)	40	7	Yes	To prevent fleas (or other pests)	Yes	Herbal pet supplies - no more bites	Advocate	Advocate	12	From a veterinary practice	Yes	NA	NA	No	No	No	NA	Yes	May	12	In their own bed;On the floor	In their own bed	Every week or more	Every day	Every month	At the groomers	Every week or more	2 hours	6 hours	Mainly on unpaved surfaces like field margins, forest tracks or the beach	Yes, I walk my dog even if it is raining heavily and my dog gets completely wet	10	Bag and bin (specific dog poo bin);Bag and bin (home council bin)	Bag and bin (specific dog poo bin)	No	NA	NA	NA	NA	NA	NA	NA	NA	NA	NA	NA	NA
2020/06/22 10:02:02 PM GMT+1	Dog	Large (20-40kg)	33	2	Yes	To prevent fleas (or other pests)	No	NA	Bravecto tablet	Bravecto tablet	4	From a veterinary practice	NA	NA	NA	Yes	No	No	NA	No	NA	4	In their own bed;On the furniture;On the floor;In a crate	In a crate	Every month	Every day	Never	In a bath, sink or shower	Every month	2 hours	2 hours	Mainly on unpaved surfaces like field margins, forest tracks or the beach	Yes, I walk my dog even if it is raining heavily and my dog gets completely wet	10	Bag and bin (specific dog poo bin)	Bag and bin (specific dog poo bin)	No	NA	NA	NA	NA	NA	NA	NA	NA	NA	NA	NA	NA
2020/06/22 10:02:31 PM GMT+1	Dog	Medium (10-20 kg)	19	4	Yes	To prevent fleas (or other pests)	No	NA	Advocate	Advocate	12	From a veterinary practice	Yes	Yes	Yes	No	Yes	Yes	August;September	No	NA	4	In their own bed;On the furniture;On the floor	In their own bed	Less than once a year	Every day	Less than once a year	Outdoors	Never	1 hour	2 hours	An equal mixture of the above	Yes, I walk my dog even if it is raining heavily and my dog gets completely wet	9	Bag and bin (specific dog poo bin);Bag and bin (home council bin);Straight in a bin (of any kind)	Bag and bin (specific dog poo bin)	No	NA	NA	NA	NA	NA	NA	NA	NA	NA	NA	NA	NA
2020/06/22 10:03:40 PM GMT+1	Dog	Medium (10-20 kg)	NA	2	Yes	To prevent fleas (or other pests)	Yes	NA	Frontline or Frontline Combo spot on	Frontline or Frontline Combo spot on	3	Online	Yes	No	NA	No	No	No	NA	Yes	May	3	On a family member's bed	On the furniture	Once a year	Every day	Every 2 weeks	In a bath, sink or shower	Never	2 hours	3 hours	An equal mixture of the above	Yes, I will walk my dog in light drizzle	10	Bag and bin (specific dog poo bin);Bag and bin (home council bin);Flush down the toilet	Bag and bin (specific dog poo bin)	No	NA	NA	NA	NA	NA	NA	NA	NA	NA	NA	NA	NA
2020/06/22 10:05:40 PM GMT+1	Cat	NA	NA	NA	NA	NA	NA	NA	NA	NA	NA	NA	NA	NA	NA	NA	NA	NA	NA	NA	NA	NA	NA	NA	NA	NA	NA	NA	NA	NA	NA	NA	NA	NA	NA	NA	NA	Small (below 4kg)	NA	<1	Yes	To prevent fleas (or other pests)	No	NA	Itch - flea	Itch - flea	8	Online	No
2020/06/22 10:10:48 PM GMT+1	Cat	NA	NA	NA	NA	NA	NA	NA	NA	NA	NA	NA	NA	NA	NA	NA	NA	NA	NA	NA	NA	NA	NA	NA	NA	NA	NA	NA	NA	NA	NA	NA	NA	NA	NA	NA	NA	Large (above 4 kg)	5	3	Yes	To prevent fleas (or other pests)	No	NA	Stronghold	Stronghold	12	From a veterinary practice	No
2020/06/22 10:11:52 PM GMT+1	Dog	Medium (10-20 kg)	14	11	Yes	To prevent fleas (or other pests)	No	NA	Bravecto tablet	Bravecto tablet	3	From a veterinary practice	NA	NA	NA	No	No	No	NA	No	NA	3	In their own bed;On the furniture;On the floor	On the floor	Every 3 months	Every day	Every 6 months	At the groomers	Less than once a year	1 hour	3 hours	Mainly on unpaved surfaces like field margins, forest tracks or the beach	Yes, I walk my dog even if it is raining heavily and my dog gets completely wet	0	None of the above/don't know	None of the above/don't know	No	NA	NA	NA	NA	NA	NA	NA	NA	NA	NA	NA	NA
2020/06/22 10:13:18 PM GMT+1	Dog	Large (20-40kg)	35	5	Yes	To prevent fleas (or other pests)	No	NA	Bravecto tablet	Bravecto tablet	3	From a veterinary practice	Don't know	Yes	Yes	No	No	No	NA	Yes	April;September	4	In their own bed;On the furniture;On the floor	On the floor	Every 2 weeks	Every day	Every month	In a bath, sink or shower	Every 3 months	1 hour	2 hours	An equal mixture of the above	Yes, I walk my dog even if it is raining heavily and my dog gets completely wet	10	Bag and bin (specific dog poo bin);Bag and bin (home council bin)	Bag and bin (specific dog poo bin)	No	NA	NA	NA	NA	NA	NA	NA	NA	NA	NA	NA	NA
2020/06/22 10:14:43 PM GMT+1	Cat	NA	NA	NA	NA	NA	NA	NA	NA	NA	NA	NA	NA	NA	NA	NA	NA	NA	NA	NA	NA	NA	NA	NA	NA	NA	NA	NA	NA	NA	NA	NA	NA	NA	NA	NA	NA	Large (above 4 kg)	4.2	12	Yes	To prevent fleas (or other pests)	No	NA	Advocate;Bravecto	Bravecto	3	From a veterinary practice	No
2020/06/22 10:15:57 PM GMT+1	Dog	Medium (10-20 kg)	16	5	Yes	In response to a flea infestation	No	NA	Advantage	Advantage	3	From a supermarket	Yes	Yes	Yes	No	Yes	Yes	May;August	No	NA	3	On a family member's bed	On a family member's bed	Every month	Every day	Every 6 months	In a bath, sink or shower	Every 6 months	2 hours	2 hours	Mainly on unpaved surfaces like field margins, forest tracks or the beach	Yes, I walk my dog even if it is raining heavily and my dog gets completely wet	9	Bag and bin (home council bin);Straight in a bin (of any kind)	Bag and bin (home council bin)	No	NA	NA	NA	NA	NA	NA	NA	NA	NA	NA	NA	NA
2020/06/22 10:16:33 PM GMT+1	Dog	Large (20-40kg)	37	14	Yes	In response to other pests (eg ticks)	No	NA	Bravecto tablet	Bravecto tablet	3	From a veterinary practice	NA	NA	NA	No	No	No	NA	No	NA	2	In their own bed;On the floor	In their own bed	Less than once a year	Every day	Once a year	Outdoors	Once a year	10 minutes	1 hour	Mainly on unpaved surfaces like field margins, forest tracks or the beach	Yes, I will walk my dog in light drizzle	10	Bag and bin (specific dog poo bin);Bag and bin (home council bin)	Bag and bin (home council bin)	No	NA	NA	NA	NA	NA	NA	NA	NA	NA	NA	NA	NA
2020/06/22 10:18:05 PM GMT+1	Cat	NA	NA	NA	NA	NA	NA	NA	NA	NA	NA	NA	NA	NA	NA	NA	NA	NA	NA	NA	NA	NA	NA	NA	NA	NA	NA	NA	NA	NA	NA	NA	NA	NA	NA	NA	NA	Large (above 4 kg)	5	3	Yes	To prevent fleas (or other pests)	No	NA	Frontline or Frontline Combo	Frontline or Frontline Combo	7	From a petshop	Yes
2020/06/22 10:19:14 PM GMT+1	Dog	Large (20-40kg)	36	12	Yes	In response to a flea infestation	Yes	Diatomaceous earth, rubbed in.	Diatomaceous earth.	Diatomaceous earth	1	Online	NA	NA	NA	No	Yes	Yes	October	Yes	March;June	Don't know	In their own bed;On the floor	In their own bed	Every month	Every day	Never	NA	Less than once a year	10 minutes	6 hours	Mainly on unpaved surfaces like field margins, forest tracks or the beach	Occasionally, but I try to avoid this	9	Bag and bin (specific dog poo bin);Bag and bin (home council bin)	Bag and bin (specific dog poo bin)	No	NA	NA	NA	NA	NA	NA	NA	NA	NA	NA	NA	NA
2020/06/22 10:20:25 PM GMT+1	Dog	Medium (10-20 kg)	12.5	<1	Yes	To prevent fleas (or other pests)	No	NA	Stronghold	Stronghold	Don't know	From a veterinary practice	Yes	Yes	Yes	No	No	No	NA	No	NA	6	In their own bed;On the furniture;On the floor;In a crate	In a crate	Every month	Every day	Every 6 months	In a bath, sink or shower	Never	10 minutes	6 hours	Mainly on paved surfaces	Yes, I walk my dog even if it is raining heavily and my dog gets completely wet	0	Bag and bin (specific dog poo bin)	Bag and bin (specific dog poo bin)	No	NA	NA	NA	NA	NA	NA	NA	NA	NA	NA	NA	NA
2020/06/22 10:20:37 PM GMT+1	Dog	Large (20-40kg)	25	2	Yes	To prevent fleas (or other pests)	No	NA	NexGard	NexGard	Don't know	From a veterinary practice	NA	NA	NA	No	No	No	NA	No	NA	12	In their own bed;On the furniture	On the furniture	Once a year	Every day	Every week or more	In a bath, sink or shower	Every week or more	1 hour	3 hours	An equal mixture of the above	Yes, I will walk my dog in light drizzle	10	Bag and bin (specific dog poo bin);Bag and bin (home council bin);Straight in a bin (of any kind)	Bag and bin (home council bin)	No	NA	NA	NA	NA	NA	NA	NA	NA	NA	NA	NA	NA
2020/06/22 10:21:47 PM GMT+1	Dog	Medium (10-20 kg)	11	3	Yes	To prevent fleas (or other pests)	No	NA	Frontline or Frontline Combo spot on	Frontline or Frontline Combo spot on	2	From a supermarket	Yes	Yes	Yes	No	No	No	NA	No	NA	2	In their own bed	In their own bed	Every 3 months	Every day	Every month	In a bath, sink or shower	Never	1 hour	6 hours	Mainly on paved surfaces	Yes, I will walk my dog in light drizzle	10	Bag and bin (specific dog poo bin);Straight in a bin (of any kind)	Straight in a bin (of any kind)	No	NA	NA	NA	NA	NA	NA	NA	NA	NA	NA	NA	NA
2020/06/22 10:24:48 PM GMT+1	Cat	NA	NA	NA	NA	NA	NA	NA	NA	NA	NA	NA	NA	NA	NA	NA	NA	NA	NA	NA	NA	NA	NA	NA	NA	NA	NA	NA	NA	NA	NA	NA	NA	NA	NA	NA	NA	Small (below 4kg)	3.5	10	Yes	To prevent fleas (or other pests)	No	NA	Bravecto	Bravecto	4	From a veterinary practice	Yes
2020/06/22 10:25:10 PM GMT+1	Cat	NA	NA	NA	NA	NA	NA	NA	NA	NA	NA	NA	NA	NA	NA	NA	NA	NA	NA	NA	NA	NA	NA	NA	NA	NA	NA	NA	NA	NA	NA	NA	NA	NA	NA	NA	NA	Small (below 4kg)	3.6	17	Yes	To prevent fleas (or other pests)	No	NA	Advocate	Advocate	8	From a veterinary practice	No
2020/06/22 10:25:46 PM GMT+1	Cat	NA	NA	NA	NA	NA	NA	NA	NA	NA	NA	NA	NA	NA	NA	NA	NA	NA	NA	NA	NA	NA	NA	NA	NA	NA	NA	NA	NA	NA	NA	NA	NA	NA	NA	NA	NA	Large (above 4 kg)	5	6	Yes	Other reason	No	NA	Advantage	Advantage	2	From a veterinary practice	No
2020/06/22 10:25:58 PM GMT+1	Cat	NA	NA	NA	NA	NA	NA	NA	NA	NA	NA	NA	NA	NA	NA	NA	NA	NA	NA	NA	NA	NA	NA	NA	NA	NA	NA	NA	NA	NA	NA	NA	NA	NA	NA	NA	NA	Large (above 4 kg)	5	9	Yes	To prevent fleas (or other pests)	No	NA	Advantage	Advantage	10	From a veterinary practice	Yes
2020/06/22 10:26:15 PM GMT+1	Dog	Large (20-40kg)	28	5	Yes	Other reason	Yes	Easecto from vets	Easecto	Easecto from vets	1	None of the above	NA	NA	NA	No	No	No	NA	No	NA	1	In their own bed	In their own bed	Every month	Every day	Less than once a year	In a bath, sink or shower	Never	2 hours	3 hours	An equal mixture of the above	Occasionally, but I try to avoid this	8	Bag and bin (specific dog poo bin);Bag and bin (home council bin);Straight in a bin (of any kind);Flush down the toilet	Bag and bin (specific dog poo bin)	No	NA	NA	NA	NA	NA	NA	NA	NA	NA	NA	NA	NA
2020/06/22 10:26:30 PM GMT+1	Dog	Large (20-40kg)	22	3	Yes	To prevent fleas (or other pests)	No	NA	Bravecto tablet	Bravecto tablet	3	From a veterinary practice	NA	NA	NA	No	No	No	NA	Yes	April;May	12	In their own bed;On the furniture;On a family member's bed	On a family member's bed	Less than once a year	Every day	Every month	In a bath, sink or shower	Every 2 weeks	2 hours	2 hours	Mainly on unpaved surfaces like field margins, forest tracks or the beach	Yes, I walk my dog even if it is raining heavily and my dog gets completely wet	9	Bag and bin (specific dog poo bin);Bag and bin (home council bin)	Bag and bin (specific dog poo bin)	No	NA	NA	NA	NA	NA	NA	NA	NA	NA	NA	NA	NA
2020/06/22 10:27:39 PM GMT+1	Cat	NA	NA	NA	NA	NA	NA	NA	NA	NA	NA	NA	NA	NA	NA	NA	NA	NA	NA	NA	NA	NA	NA	NA	NA	NA	NA	NA	NA	NA	NA	NA	NA	NA	NA	NA	NA	Large (above 4 kg)	5.5	7	Yes	To prevent fleas (or other pests)	No	NA	Bravecto	Bravecto	5	From a veterinary practice	Yes
2020/06/22 10:30:15 PM GMT+1	Dog	Large (20-40kg)	38	5	Yes	To prevent fleas (or other pests)	No	NA	Advocate;NexGard Spectra	NexGard Spectra	12	Online	Yes	Yes	Yes	No	No	No	NA	No	NA	4	In their own bed;On the furniture	On the furniture	Every 3 months	Every day	Every 3 months	In a bath, sink or shower	Never	2 hours	3 hours	An equal mixture of the above	Yes, I will walk my dog in light drizzle	10	Bag and bin (specific dog poo bin);Bag and bin (home council bin);Straight in a bin (of any kind)	Straight in a bin (of any kind)	No	NA	NA	NA	NA	NA	NA	NA	NA	NA	NA	NA	NA
2020/06/22 10:30:39 PM GMT+1	Dog	Medium (10-20 kg)	NA	7	Yes	In response to other pests (eg ticks)	Yes	vinegar	Frontline or Frontline Combo spot on	Frontline or Frontline Combo spot on	2	Online	No	Yes	Yes	No	Yes	No	NA	Yes	September	1	In their own bed;On the furniture;On a family member's bed;On the floor	In their own bed	Every week or more	Every day	Every 3 months	At the groomers	Every 6 months	Don't know	6 hours	Mainly on unpaved surfaces like field margins, forest tracks or the beach	Yes, I walk my dog even if it is raining heavily and my dog gets completely wet	10	Bag and bin (specific dog poo bin)	Bag and bin (home council bin)	No	NA	NA	NA	NA	NA	NA	NA	NA	NA	NA	NA	NA
2020/06/22 10:30:54 PM GMT+1	Dog	Large (20-40kg)	25	7	Yes	To prevent fleas (or other pests)	No	NA	Endectrid	Endectrid	12	From a veterinary practice	NA	NA	NA	No	No	No	NA	Yes	June;July	11	In their own bed;On the furniture;On the floor;In a crate	On the furniture	Every 3 months	Every day	Every 6 months	Outdoors	Never	1 hour	3 hours	An equal mixture of the above	Yes, I will walk my dog in light drizzle	9	Bag and bin (specific dog poo bin);Bag and bin (home council bin)	Bag and bin (home council bin)	No	NA	NA	NA	NA	NA	NA	NA	NA	NA	NA	NA	NA
2020/06/22 10:31:19 PM GMT+1	Cat	NA	NA	NA	NA	NA	NA	NA	NA	NA	NA	NA	NA	NA	NA	NA	NA	NA	NA	NA	NA	NA	NA	NA	NA	NA	NA	NA	NA	NA	NA	NA	NA	NA	NA	NA	NA	Large (above 4 kg)	5.4	11	Yes	To prevent fleas (or other pests)	No	NA	Stronghold	Stronghold	12	From a veterinary practice	Yes
2020/06/22 10:31:34 PM GMT+1	Dog	Medium (10-20 kg)	15	11	Yes	In response to other pests (eg ticks)	Yes	Spotix	Seresto collar	Seresto collar	1	From a veterinary practice	NA	Yes	Yes	No	Yes	Yes	June	Yes	March;May	1	In their own bed;On the furniture;On a family member's bed	In their own bed	Every week or more	Every day	Every month	At the groomers	Every week or more	3 hours	3 hours	An equal mixture of the above	Yes, I walk my dog even if it is raining heavily and my dog gets completely wet	10	Bag and bin (specific dog poo bin);Bag and bin (home council bin)	Bag and bin (specific dog poo bin)	No	NA	NA	NA	NA	NA	NA	NA	NA	NA	NA	NA	NA
2020/06/22 10:31:53 PM GMT+1	Dog	Large (20-40kg)	NA	7	Yes	To prevent fleas (or other pests)	No	NA	NexGard;Seresto collar	Seresto collar	3	From a veterinary practice	NA	Yes	Yes	No	No	No	NA	No	NA	2	In their own bed	On the floor	Every month	Every day	Every month	In a bath, sink or shower	Never	1 hour	6 hours	An equal mixture of the above	Yes, I will walk my dog in light drizzle	5	Bag and bin (specific dog poo bin);Bag and bin (home council bin)	Bag and bin (home council bin)	No	NA	NA	NA	NA	NA	NA	NA	NA	NA	NA	NA	NA
2020/06/22 10:32:52 PM GMT+1	Cat	NA	NA	NA	NA	NA	NA	NA	NA	NA	NA	NA	NA	NA	NA	NA	NA	NA	NA	NA	NA	NA	NA	NA	NA	NA	NA	NA	NA	NA	NA	NA	NA	NA	NA	NA	NA	Large (above 4 kg)	4.6	7	Yes	To prevent fleas (or other pests)	No	NA	Endectrid;Felisecto Plus	Felisecto Plus	12	From a veterinary practice	Yes
2020/06/22 10:32:55 PM GMT+1	Cat	NA	NA	NA	NA	NA	NA	NA	NA	NA	NA	NA	NA	NA	NA	NA	NA	NA	NA	NA	NA	NA	NA	NA	NA	NA	NA	NA	NA	NA	NA	NA	NA	NA	NA	NA	NA	Large (above 4 kg)	4	1	Yes	To prevent fleas (or other pests)	No	NA	Broadline	Broadline	12	Online	Yes
2020/06/22 10:32:56 PM GMT+1	Dog	Large (20-40kg)	30	5	Yes	To prevent fleas (or other pests)	No	NA	NexGard Spectra	NexGard Spectra	2	Online	NA	Yes	NA	No	Yes	Yes	May	Yes	July	2	In their own bed	In their own bed	Every 3 months	Every day	Every 3 months	Outdoors	Every month	2 hours	2 hours	Mainly on unpaved surfaces like field margins, forest tracks or the beach	Yes, I walk my dog even if it is raining heavily and my dog gets completely wet	10	Bag and bin (specific dog poo bin)	Bag and bin (specific dog poo bin)	No	NA	NA	NA	NA	NA	NA	NA	NA	NA	NA	NA	NA
2020/06/22 10:39:04 PM GMT+1	Dog	Medium (10-20 kg)	13	3	Yes	To prevent fleas (or other pests)	No	NA	Bravecto tablet	Bravecto tablet	4	From a veterinary practice	NA	NA	NA	No	No	No	NA	Yes	May	4	In their own bed;On the furniture;On the floor;In a crate	In their own bed	Every 2 weeks	Every day	Every 3 months	In a bath, sink or shower	Every week or more	30 minutes	1 hour	Mainly on unpaved surfaces like field margins, forest tracks or the beach	Yes, I walk my dog even if it is raining heavily and my dog gets completely wet	8	Bag and bin (specific dog poo bin);Bag and bin (home council bin)	Bag and bin (specific dog poo bin)	No	NA	NA	NA	NA	NA	NA	NA	NA	NA	NA	NA	NA
2020/06/22 10:39:16 PM GMT+1	Cat	NA	NA	NA	NA	NA	NA	NA	NA	NA	NA	NA	NA	NA	NA	NA	NA	NA	NA	NA	NA	NA	NA	NA	NA	NA	NA	NA	NA	NA	NA	NA	NA	NA	NA	NA	NA	Large (above 4 kg)	NA	12	Yes	To prevent fleas (or other pests)	No	NA	Frontline or Frontline Combo	Frontline or Frontline Combo	12	Online	Yes
2020/06/22 10:40:17 PM GMT+1	Cat	NA	NA	NA	NA	NA	NA	NA	NA	NA	NA	NA	NA	NA	NA	NA	NA	NA	NA	NA	NA	NA	NA	NA	NA	NA	NA	NA	NA	NA	NA	NA	NA	NA	NA	NA	NA	Small (below 4kg)	NA	6	Yes	To prevent fleas (or other pests)	No	NA	Frontline or Frontline Combo	Frontline or Frontline Combo	1	From a veterinary practice	No
2020/06/22 10:40:54 PM GMT+1	Cat	NA	NA	NA	NA	NA	NA	NA	NA	NA	NA	NA	NA	NA	NA	NA	NA	NA	NA	NA	NA	NA	NA	NA	NA	NA	NA	NA	NA	NA	NA	NA	NA	NA	NA	NA	NA	Small (below 4kg)	NA	2	Yes	In response to a flea infestation	No	NA	Frontline or Frontline Combo	Frontline or Frontline Combo	6	From a supermarket	Yes
2020/06/22 10:41:58 PM GMT+1	Cat	NA	NA	NA	NA	NA	NA	NA	NA	NA	NA	NA	NA	NA	NA	NA	NA	NA	NA	NA	NA	NA	NA	NA	NA	NA	NA	NA	NA	NA	NA	NA	NA	NA	NA	NA	NA	Large (above 4 kg)	6	9	Yes	To prevent fleas (or other pests)	No	NA	Advocate;Frontline or Frontline Combo	Advocate	3	From a petshop	No
2020/06/22 10:42:05 PM GMT+1	Dog	Medium (10-20 kg)	17	6	No	NA	NA	NA	NA	NA	NA	NA	NA	NA	NA	NA	No	No	NA	Yes	June	1	In their own bed;On the furniture;On the floor	On the furniture	Every month	Every day	Every 6 months	In a bath, sink or shower	Every 3 months	1 hour	3 hours	Mainly on unpaved surfaces like field margins, forest tracks or the beach	Yes, I walk my dog even if it is raining heavily and my dog gets completely wet	5	Bag and bin (specific dog poo bin);Bag and bin (home council bin);Straight in a bin (of any kind)	Straight in a bin (of any kind)	No	NA	NA	NA	NA	NA	NA	NA	NA	NA	NA	NA	NA
2020/06/22 10:42:07 PM GMT+1	Dog	Medium (10-20 kg)	10.4	3	Yes	To prevent fleas (or other pests)	No	NA	NexGard;NexGard Spectra	NexGard Spectra	12	From a veterinary practice	No	Yes	Yes	No	No	No	NA	Yes	January	4	In their own bed;On the furniture;On a family member's bed;On the floor;In a crate	On the furniture	Every 3 months	Every day	Every week or more	Outdoors	Every week or more	1 hour	3 hours	An equal mixture of the above	Yes, I walk my dog even if it is raining heavily and my dog gets completely wet	10	Bag and bin (specific dog poo bin);Bag and bin (home council bin)	Bag and bin (specific dog poo bin)	No	NA	NA	NA	NA	NA	NA	NA	NA	NA	NA	NA	NA
2020/06/22 10:42:11 PM GMT+1	Cat	NA	NA	NA	NA	NA	NA	NA	NA	NA	NA	NA	NA	NA	NA	NA	NA	NA	NA	NA	NA	NA	NA	NA	NA	NA	NA	NA	NA	NA	NA	NA	NA	NA	NA	NA	NA	Large (above 4 kg)	6	10	Yes	To prevent fleas (or other pests)	No	NA	Advantage	Advantage	4	Online	Yes
2020/06/22 10:51:12 PM GMT+1	Dog	Medium (10-20 kg)	12	10	No	NA	NA	NA	NA	NA	NA	NA	NA	NA	NA	NA	No	No	NA	No	NA	1	In their own bed	In their own bed	Every month	Every day	Every 3 months	In a bath, sink or shower	Every week or more	1 hour	2 hours	Mainly on unpaved surfaces like field margins, forest tracks or the beach	Yes, I will walk my dog in light drizzle	8	Bag and bin (specific dog poo bin);Bag and bin (home council bin)	Bag and bin (home council bin)	No	NA	NA	NA	NA	NA	NA	NA	NA	NA	NA	NA	NA
2020/06/22 10:52:57 PM GMT+1	Dog	Large (20-40kg)	33	7	Yes	To prevent fleas (or other pests)	No	NA	Bravecto tablet	Bravecto tablet	3	From a veterinary practice	NA	NA	NA	No	No	No	NA	No	NA	3	In their own bed;On the furniture;Outdoors kennel/building	In their own bed	Every 2 weeks	Every day	Every month	Outdoors	Every 2 weeks	1 hour	2 hours	An equal mixture of the above	Yes, I walk my dog even if it is raining heavily and my dog gets completely wet	9	Bag and bin (specific dog poo bin);Bag and bin (home council bin)	Bag and bin (specific dog poo bin)	No	NA	NA	NA	NA	NA	NA	NA	NA	NA	NA	NA	NA
2020/06/22 10:53:19 PM GMT+1	Cat	NA	NA	NA	NA	NA	NA	NA	NA	NA	NA	NA	NA	NA	NA	NA	NA	NA	NA	NA	NA	NA	NA	NA	NA	NA	NA	NA	NA	NA	NA	NA	NA	NA	NA	NA	NA	Small (below 4kg)	5	6	Yes	To prevent fleas (or other pests)	No	NA	Bravecto	Bravecto	4	From a veterinary practice	Yes
2020/06/22 10:55:23 PM GMT+1	Cat	NA	NA	NA	NA	NA	NA	NA	NA	NA	NA	NA	NA	NA	NA	NA	NA	NA	NA	NA	NA	NA	NA	NA	NA	NA	NA	NA	NA	NA	NA	NA	NA	NA	NA	NA	NA	Large (above 4 kg)	5.3	6	Yes	To prevent fleas (or other pests)	No	NA	Bravecto	Bravecto	2	From a veterinary practice	No
2020/06/22 10:55:27 PM GMT+1	Dog	Medium (10-20 kg)	17	3	Yes	To prevent fleas (or other pests)	No	NA	Bravecto tablet	Bravecto tablet	4	From a veterinary practice	NA	NA	NA	No	No	No	NA	Yes	May;June;July	4	In their own bed;On the furniture;On a family member's bed;On the floor	In their own bed	Once a year	Every day	Every 2 weeks	In a bath, sink or shower	Every month	1 hour	2 hours	An equal mixture of the above	Yes, I walk my dog even if it is raining heavily and my dog gets completely wet	9	Bag and bin (specific dog poo bin);Bag and bin (home council bin)	Bag and bin (home council bin)	No	NA	NA	NA	NA	NA	NA	NA	NA	NA	NA	NA	NA
2020/06/22 10:55:57 PM GMT+1	Dog	Large (20-40kg)	30	1	Yes	To prevent fleas (or other pests)	No	NA	NexGard	NexGard	12	From a veterinary practice	No	NA	NA	No	No	No	NA	No	NA	12	In a crate	In a crate	Every 2 weeks	Every day	Every 2 weeks	Outdoors	Never	1 hour	2 hours	An equal mixture of the above	Occasionally, but I try to avoid this	10	Bag and bin (home council bin)	Bag and bin (home council bin)	No	NA	NA	NA	NA	NA	NA	NA	NA	NA	NA	NA	NA
2020/06/22 11:02:00 PM GMT+1	Cat	NA	NA	NA	NA	NA	NA	NA	NA	NA	NA	NA	NA	NA	NA	NA	NA	NA	NA	NA	NA	NA	NA	NA	NA	NA	NA	NA	NA	NA	NA	NA	NA	NA	NA	NA	NA	Large (above 4 kg)	5.5	6	Yes	In response to a flea infestation	No	NA	Advantage	Advantage	3	Online	No
2020/06/22 11:03:38 PM GMT+1	Dog	Small (4-10kg)	7	3	Yes	To prevent fleas (or other pests)	No	NA	Advocate;Bravecto tablet	Advocate	4	Online	Yes	Yes	Yes	No	No	No	NA	No	NA	5	On the furniture;On a family member's bed;On the floor	On a family member's bed	Every month	Every day	Less than once a year	Outdoors	Less than once a year	Don't know	2 hours	Mainly on unpaved surfaces like field margins, forest tracks or the beach	Yes, I will walk my dog in light drizzle	9	Bag and bin (specific dog poo bin);Bag and bin (home council bin)	Bag and bin (home council bin)	No	NA	NA	NA	NA	NA	NA	NA	NA	NA	NA	NA	NA
2020/06/22 11:06:44 PM GMT+1	Dog	Extra large (over 40 kg)	48	2	Yes	To prevent fleas (or other pests)	No	NA	Advantage	Advantage	4	Online	Yes	NA	NA	No	Yes	Yes	May;June	No	NA	2	In their own bed;On the furniture;On a family member's bed;On the floor	On the furniture	Every week or more	Every day	Every 3 months	In a bath, sink or shower	Less than once a year	30 minutes	3 hours	An equal mixture of the above	Yes, I will walk my dog in light drizzle	10	Bag and bin (specific dog poo bin);Bag and bin (home council bin)	Bag and bin (home council bin)	No	NA	NA	NA	NA	NA	NA	NA	NA	NA	NA	NA	NA
2020/06/22 11:08:33 PM GMT+1	Dog	Large (20-40kg)	32	4	Yes	In response to other pests (eg ticks)	No	NA	Bravecto tablet	Bravecto tablet	4	From a veterinary practice	NA	NA	NA	No	No	Yes	May	Yes	April;May;June	4	In their own bed	In their own bed	Every month	Every day	Once a year	Outdoors	Every week or more	1 hour	6 hours	Mainly on unpaved surfaces like field margins, forest tracks or the beach	Yes, I walk my dog even if it is raining heavily and my dog gets completely wet	8	Bag and bin (home council bin)	Bag and bin (home council bin)	No	NA	NA	NA	NA	NA	NA	NA	NA	NA	NA	NA	NA
2020/06/22 11:10:01 PM GMT+1	Cat	NA	NA	NA	NA	NA	NA	NA	NA	NA	NA	NA	NA	NA	NA	NA	NA	NA	NA	NA	NA	NA	NA	NA	NA	NA	NA	NA	NA	NA	NA	NA	NA	NA	NA	NA	NA	Large (above 4 kg)	5	16	Yes	To prevent fleas (or other pests)	No	NA	Bob Martin Clear / Clear Plus (Fipronil);Frontline or Frontline Combo	Frontline or Frontline Combo	10	From a veterinary practice	Yes
2020/06/22 11:10:03 PM GMT+1	Dog	Large (20-40kg)	27	6	Yes	In response to a flea infestation	No	NA	Capstar	Capstar	5	Online	Don't know	NA	NA	NA	Yes	Yes	June;July	No	NA	2	In their own bed;On the furniture;On the floor;In a crate	In their own bed	Every month	Every day	Once a year	In a bath, sink or shower	Every month	30 minutes	3 hours	Mainly on unpaved surfaces like field margins, forest tracks or the beach	Yes, I will walk my dog in light drizzle	10	Bag and bin (home council bin)	Bag and bin (home council bin)	No	NA	NA	NA	NA	NA	NA	NA	NA	NA	NA	NA	NA
2020/06/22 11:13:28 PM GMT+1	Dog	Large (20-40kg)	25	11	Yes	To prevent fleas (or other pests)	No	NA	NexGard Spectra	NexGard Spectra	12	From a veterinary practice	NA	NA	NA	No	No	No	NA	No	NA	12	In their own bed;On the furniture;On a family member's bed;On the floor	In their own bed	Every 3 months	Every day	Less than once a year	Outdoors	Less than once a year	30 minutes	1 hour	Mainly on paved surfaces	Yes, I will walk my dog in light drizzle	9	Bag and bin (specific dog poo bin)	Bag and bin (specific dog poo bin)	No	NA	NA	NA	NA	NA	NA	NA	NA	NA	NA	NA	NA
2020/06/22 11:14:12 PM GMT+1	Dog	Small (4-10kg)	9.6	8	Yes	To prevent fleas (or other pests)	No	NA	Advocate;NexGard;NexGard Spectra	NexGard Spectra	12	From a veterinary practice	Yes	Yes	Yes	No	No	No	NA	No	NA	12	In their own bed;On a family member's bed	In their own bed	Every month	Every day	Every 3 months	In a bath, sink or shower	Every 6 months	1 hour	6 hours	Mainly on unpaved surfaces like field margins, forest tracks or the beach	Yes, I walk my dog even if it is raining heavily and my dog gets completely wet	7	Bag and bin (specific dog poo bin);Bury in the ground	Bury in the ground	No	NA	NA	NA	NA	NA	NA	NA	NA	NA	NA	NA	NA
2020/06/22 11:14:46 PM GMT+1	Dog	Medium (10-20 kg)	13	7	Yes	To prevent fleas (or other pests)	No	NA	Bravecto tablet	Bravecto tablet	3	Online	NA	NA	NA	No	No	No	NA	No	NA	6	In their own bed;On a family member's bed;On the floor;In a crate	In their own bed	Every 6 months	Every week	Every 3 months	In a bath, sink or shower	Never	2 hours	2 hours	Mainly on unpaved surfaces like field margins, forest tracks or the beach	Yes, I will walk my dog in light drizzle	9	Bag and bin (specific dog poo bin);Bag and bin (home council bin);Straight in a bin (of any kind)	Bag and bin (specific dog poo bin)	No	NA	NA	NA	NA	NA	NA	NA	NA	NA	NA	NA	NA
2020/06/22 11:16:15 PM GMT+1	Dog	Large (20-40kg)	34	9	Yes	In response to a flea infestation	Yes	NA	Capstar	Capstar	6	Online	No	NA	NA	No	Yes	Yes	June;July	No	NA	3	In their own bed;On the furniture;In a crate	On the furniture	Every month	Every day	Once a year	In a bath, sink or shower	Every month	2 hours	3 hours	Mainly on unpaved surfaces like field margins, forest tracks or the beach	Yes, I walk my dog even if it is raining heavily and my dog gets completely wet	8	Bag and bin (specific dog poo bin);Bag and bin (home council bin)	Bag and bin (home council bin)	No	NA	NA	NA	NA	NA	NA	NA	NA	NA	NA	NA	NA
2020/06/22 11:16:23 PM GMT+1	Cat	NA	NA	NA	NA	NA	NA	NA	NA	NA	NA	NA	NA	NA	NA	NA	NA	NA	NA	NA	NA	NA	NA	NA	NA	NA	NA	NA	NA	NA	NA	NA	NA	NA	NA	NA	NA	Large (above 4 kg)	4.3	13	Yes	To prevent fleas (or other pests)	No	NA	Advocate	Advocate	3	From a veterinary practice	Yes
2020/06/22 11:16:31 PM GMT+1	Cat	NA	NA	NA	NA	NA	NA	NA	NA	NA	NA	NA	NA	NA	NA	NA	NA	NA	NA	NA	NA	NA	NA	NA	NA	NA	NA	NA	NA	NA	NA	NA	NA	NA	NA	NA	NA	Large (above 4 kg)	6.5	4	No	NA	NA	NA	NA	NA	NA	NA	NA
2020/06/22 11:16:31 PM GMT+1	Dog	Medium (10-20 kg)	15	13	Yes	To prevent fleas (or other pests)	No	NA	Advocate;Frontline or Frontline Combo spot on	Advocate	6	None of the above	Yes	Yes	Yes	No	Yes	No	NA	No	NA	6	In their own bed;On the furniture;On the floor	In their own bed	Every month	Every day	Every 6 months	Outdoors	Never	3 hours	3 hours	Mainly on unpaved surfaces like field margins, forest tracks or the beach	Yes, I will walk my dog in light drizzle	10	Bag and bin (specific dog poo bin);Bag and bin (home council bin);None of the above/don't know	None of the above/don't know	No	NA	NA	NA	NA	NA	NA	NA	NA	NA	NA	NA	NA
2020/06/22 11:17:14 PM GMT+1	Cat	NA	NA	NA	NA	NA	NA	NA	NA	NA	NA	NA	NA	NA	NA	NA	NA	NA	NA	NA	NA	NA	NA	NA	NA	NA	NA	NA	NA	NA	NA	NA	NA	NA	NA	NA	NA	Small (below 4kg)	NA	5	Yes	To prevent fleas (or other pests)	No	NA	Advantage	Advantage	9	Online	No
2020/06/22 11:19:50 PM GMT+1	Dog	Medium (10-20 kg)	13	11	Yes	In response to other pests (eg ticks)	No	NA	Bravecto tablet	Bravecto tablet	5	From a veterinary practice	NA	NA	NA	No	No	No	NA	Yes	April;May;June;July;August;September	3	In a crate	In a crate	Every 6 months	Every day	Once a year	In a bath, sink or shower	Every 6 months	1 hour	3 hours	Mainly on unpaved surfaces like field margins, forest tracks or the beach	Yes, I will walk my dog in light drizzle	8	Bag and bin (specific dog poo bin)	Bag and bin (specific dog poo bin)	No	NA	NA	NA	NA	NA	NA	NA	NA	NA	NA	NA	NA
2020/06/22 11:20:53 PM GMT+1	Dog	Large (20-40kg)	25	1	No	NA	NA	NA	NA	NA	NA	NA	NA	NA	NA	NA	No	Yes	June;July	Yes	May;June	3	In their own bed;On the furniture;On the floor;In a crate	On the floor	Every month	Every day	Once a year	NA	Less than once a year	2 hours	6 hours	Mainly on unpaved surfaces like field margins, forest tracks or the beach	Yes, I walk my dog even if it is raining heavily and my dog gets completely wet	9	Bag and bin (specific dog poo bin);Bag and bin (home council bin);Bury in the ground	Bag and bin (home council bin)	No	NA	NA	NA	NA	NA	NA	NA	NA	NA	NA	NA	NA
2020/06/22 11:21:40 PM GMT+1	Cat	NA	NA	NA	NA	NA	NA	NA	NA	NA	NA	NA	NA	NA	NA	NA	NA	NA	NA	NA	NA	NA	NA	NA	NA	NA	NA	NA	NA	NA	NA	NA	NA	NA	NA	NA	NA	Large (above 4 kg)	6	1	Yes	To prevent fleas (or other pests)	No	NA	Frontline or Frontline Combo	Frontline or Frontline Combo	5	From a petshop	No
2020/06/22 11:31:39 PM GMT+1	Cat	NA	NA	NA	NA	NA	NA	NA	NA	NA	NA	NA	NA	NA	NA	NA	NA	NA	NA	NA	NA	NA	NA	NA	NA	NA	NA	NA	NA	NA	NA	NA	NA	NA	NA	NA	NA	Small (below 4kg)	4	1	Yes	To prevent fleas (or other pests)	No	NA	Bravecto	Bravecto	3	From a veterinary practice	Yes
2020/06/22 11:39:17 PM GMT+1	Dog	Small (4-10kg)	8	11	Yes	To prevent fleas (or other pests)	No	NA	Advocate	Advocate	12	From a veterinary practice	No	No	NA	No	No	No	NA	No	NA	4	In their own bed	In their own bed	Every 3 months	Every day	Every 3 months	In a bath, sink or shower	Never	2 hours	3 hours	Mainly on unpaved surfaces like field margins, forest tracks or the beach	Yes, I will walk my dog in light drizzle	10	Straight in a bin (of any kind)	Bag and bin (home council bin)	No	NA	NA	NA	NA	NA	NA	NA	NA	NA	NA	NA	NA
2020/06/22 11:41:31 PM GMT+1	Cat	NA	NA	NA	NA	NA	NA	NA	NA	NA	NA	NA	NA	NA	NA	NA	NA	NA	NA	NA	NA	NA	NA	NA	NA	NA	NA	NA	NA	NA	NA	NA	NA	NA	NA	NA	NA	Large (above 4 kg)	4.3	6	Yes	To prevent fleas (or other pests)	No	NA	Advocate	Advocate	6	From a petshop	No
2020/06/22 11:43:25 PM GMT+1	Cat	NA	NA	NA	NA	NA	NA	NA	NA	NA	NA	NA	NA	NA	NA	NA	NA	NA	NA	NA	NA	NA	NA	NA	NA	NA	NA	NA	NA	NA	NA	NA	NA	NA	NA	NA	NA	Large (above 4 kg)	NA	<1	Yes	To prevent fleas (or other pests)	No	NA	Itch - flea	Itch - flea	4	Online	No
2020/06/22 11:45:19 PM GMT+1	Cat	NA	NA	NA	NA	NA	NA	NA	NA	NA	NA	NA	NA	NA	NA	NA	NA	NA	NA	NA	NA	NA	NA	NA	NA	NA	NA	NA	NA	NA	NA	NA	NA	NA	NA	NA	NA	Large (above 4 kg)	5	3	Yes	In response to a flea infestation	No	NA	Stronghold	Stronghold	3	From a veterinary practice	Yes
2020/06/22 11:47:51 PM GMT+1	Cat	NA	NA	NA	NA	NA	NA	NA	NA	NA	NA	NA	NA	NA	NA	NA	NA	NA	NA	NA	NA	NA	NA	NA	NA	NA	NA	NA	NA	NA	NA	NA	NA	NA	NA	NA	NA	Large (above 4 kg)	4	1	No	NA	NA	NA	NA	NA	NA	NA	NA
2020/06/23 12:01:50 AM GMT+1	Dog	Large (20-40kg)	22	1	Yes	To prevent fleas (or other pests)	No	NA	Advocate	Advocate	10	Online	No	No	NA	No	No	No	NA	No	NA	2	In their own bed	In their own bed	Every month	Every day	Every month	In a bath, sink or shower	Never	30 minutes	1 hour	Mainly on unpaved surfaces like field margins, forest tracks or the beach	Occasionally, but I try to avoid this	10	Bag and bin (specific dog poo bin);Bag and bin (home council bin);Straight in a bin (of any kind)	Bag and bin (specific dog poo bin)	No	NA	NA	NA	NA	NA	NA	NA	NA	NA	NA	NA	NA
2020/06/23 12:21:53 AM GMT+1	Dog	Large (20-40kg)	34	5	Yes	To prevent fleas (or other pests)	No	NA	Advocate	Advocate	6	Online	Yes	Yes	Yes	No	No	No	NA	No	NA	2	In their own bed;On the furniture	On the furniture	Every month	Every day	Every 3 months	In a bath, sink or shower	Never	1 hour	1 hour	Mainly on unpaved surfaces like field margins, forest tracks or the beach	Yes, I walk my dog even if it is raining heavily and my dog gets completely wet	10	Bag and bin (specific dog poo bin);Straight in a bin (of any kind)	Straight in a bin (of any kind)	No	NA	NA	NA	NA	NA	NA	NA	NA	NA	NA	NA	NA
2020/06/23 12:26:14 AM GMT+1	Cat	NA	NA	NA	NA	NA	NA	NA	NA	NA	NA	NA	NA	NA	NA	NA	NA	NA	NA	NA	NA	NA	NA	NA	NA	NA	NA	NA	NA	NA	NA	NA	NA	NA	NA	NA	NA	Large (above 4 kg)	4.6	3	Yes	To prevent fleas (or other pests)	No	NA	Broadline	Broadline	11	From a veterinary practice	Yes
2020/06/23 12:44:40 AM GMT+1	Cat	NA	NA	NA	NA	NA	NA	NA	NA	NA	NA	NA	NA	NA	NA	NA	NA	NA	NA	NA	NA	NA	NA	NA	NA	NA	NA	NA	NA	NA	NA	NA	NA	NA	NA	NA	NA	Large (above 4 kg)	4.2	2	Yes	To prevent fleas (or other pests)	No	NA	Bravecto	Bravecto	4	From a veterinary practice	Yes
2020/06/23 12:46:30 AM GMT+1	Cat	NA	NA	NA	NA	NA	NA	NA	NA	NA	NA	NA	NA	NA	NA	NA	NA	NA	NA	NA	NA	NA	NA	NA	NA	NA	NA	NA	NA	NA	NA	NA	NA	NA	NA	NA	NA	Large (above 4 kg)	5	13	Yes	To prevent fleas (or other pests)	No	NA	Advantage	Advantage	8	Online	Yes
2020/06/23 12:46:40 AM GMT+1	Cat	NA	NA	NA	NA	NA	NA	NA	NA	NA	NA	NA	NA	NA	NA	NA	NA	NA	NA	NA	NA	NA	NA	NA	NA	NA	NA	NA	NA	NA	NA	NA	NA	NA	NA	NA	NA	Large (above 4 kg)	NA	8	Yes	To prevent fleas (or other pests)	Don't know	NA	Frontline or Frontline Combo	Frontline or Frontline Combo	3	From a petshop	Yes
2020/06/23 12:47:03 AM GMT+1	Dog	Large (20-40kg)	47	3	Yes	To prevent fleas (or other pests)	No	NA	Prinovox	Prinovox	3	From a veterinary practice	Yes	Yes	Yes	No	No	No	NA	No	NA	2	On a family member's bed	On a family member's bed	Every week or more	Every day	Once a year	Outdoors	Every month	1 hour	3 hours	Mainly on unpaved surfaces like field margins, forest tracks or the beach	Yes, I walk my dog even if it is raining heavily and my dog gets completely wet	10	Bag and bin (specific dog poo bin);Bag and bin (home council bin);Straight in a bin (of any kind)	Bag and bin (home council bin)	No	NA	NA	NA	NA	NA	NA	NA	NA	NA	NA	NA	NA
2020/06/23 12:56:48 AM GMT+1	Dog	Large (20-40kg)	25	10	Yes	To prevent fleas (or other pests)	No	NA	Frontline or Frontline Combo spot on;Stronghold	Stronghold	3	From a veterinary practice	Yes	No	NA	No	Yes	No	NA	No	NA	4	In their own bed;On the furniture;On the floor	On the furniture	Every 2 weeks	Every day	Every month	Outdoors	Every 3 months	1 hour	2 hours	Mainly on unpaved surfaces like field margins, forest tracks or the beach	Yes, I will walk my dog in light drizzle	9	Bag and bin (specific dog poo bin);Bury in the ground	Bag and bin (specific dog poo bin)	No	NA	NA	NA	NA	NA	NA	NA	NA	NA	NA	NA	NA
2020/06/23 1:18:46 AM GMT+1	Dog	Medium (10-20 kg)	11	8	Yes	To prevent fleas (or other pests)	No	NA	Itch - flea	Itch - flea	6	Online	Yes	Yes	Yes	No	Yes	Yes	Don't know	Yes	May	2	On a family member's bed	On a family member's bed	Don't know	Every day	Every 3 months	In a bath, sink or shower	Never	30 minutes	3 hours	Mainly on paved surfaces	Occasionally, but I try to avoid this	10	Bag and bin (home council bin)	Bag and bin (home council bin)	No	NA	NA	NA	NA	NA	NA	NA	NA	NA	NA	NA	NA
2020/06/23 2:05:42 AM GMT+1	Cat	NA	NA	NA	NA	NA	NA	NA	NA	NA	NA	NA	NA	NA	NA	NA	NA	NA	NA	NA	NA	NA	NA	NA	NA	NA	NA	NA	NA	NA	NA	NA	NA	NA	NA	NA	NA	Small (below 4kg)	4	4	Yes	To prevent fleas (or other pests)	No	NA	Advocate	Advocate	12	From a veterinary practice	No
2020/06/23 4:04:50 AM GMT+1	Cat	NA	NA	NA	NA	NA	NA	NA	NA	NA	NA	NA	NA	NA	NA	NA	NA	NA	NA	NA	NA	NA	NA	NA	NA	NA	NA	NA	NA	NA	NA	NA	NA	NA	NA	NA	NA	Large (above 4 kg)	5	13	Yes	In response to a flea infestation	No	NA	Johnson?ÇÖs	Johnson?ÇÖs	4	Online	NA
2020/06/23 5:25:38 AM GMT+1	Dog	Extra large (over 40 kg)	45	10	Yes	To prevent fleas (or other pests)	Yes	Sorry can't remember the name	Fipnil/ Fipralone/ Fiprene/ Fiprex/ Fiproclear/ Fiprofile/ Fipronil/ Fiprotec/ Fiproxole/ Fleanil/ Fleascreen/ Flevox/ Flick/ Fyperix;Kiltix collar	Kiltix collar	2	Online	Yes	Yes	Yes	No	No	No	NA	Yes	May	10	On the furniture	On the furniture	Every 2 weeks	Every day	Every 6 months	In a bath, sink or shower	Every 6 months	30 minutes	6 hours	An equal mixture of the above	Occasionally, but I try to avoid this	10	Bag and bin (specific dog poo bin);Bag and bin (home council bin)	Bag and bin (specific dog poo bin)	No	NA	NA	NA	NA	NA	NA	NA	NA	NA	NA	NA	NA
2020/06/23 5:29:54 AM GMT+1	Cat	NA	NA	NA	NA	NA	NA	NA	NA	NA	NA	NA	NA	NA	NA	NA	NA	NA	NA	NA	NA	NA	NA	NA	NA	NA	NA	NA	NA	NA	NA	NA	NA	NA	NA	NA	NA	Small (below 4kg)	3.9	2	Yes	To prevent fleas (or other pests)	No	NA	Credelio;Moxiclear	Credelio	10	From a veterinary practice	Yes
2020/06/23 5:50:34 AM GMT+1	Dog	Medium (10-20 kg)	NA	13	No	NA	NA	NA	NA	NA	NA	NA	NA	NA	NA	NA	No	No	NA	Yes	April;May;June	None	In their own bed;On the furniture	In their own bed	Once a year	Every day	Once a year	NA	Don't know	2 hours	3 hours	Mainly on unpaved surfaces like field margins, forest tracks or the beach	Yes, I will walk my dog in light drizzle	2	None of the above/don't know	None of the above/don't know	No	NA	NA	NA	NA	NA	NA	NA	NA	NA	NA	NA	NA
2020/06/23 6:06:45 AM GMT+1	Dog	Medium (10-20 kg)	13.9	11	Yes	To prevent fleas (or other pests)	No	NA	Simparica	Simparica	5	From a veterinary practice	NA	NA	NA	No	No	No	NA	No	NA	4	In their own bed;On the floor	In their own bed	Every 3 months	Every day	Every 3 months	In a bath, sink or shower	Every month	1 hour	1 hour	Mainly on unpaved surfaces like field margins, forest tracks or the beach	Yes, I walk my dog even if it is raining heavily and my dog gets completely wet	10	Bag and bin (specific dog poo bin);Bag and bin (home council bin)	Bag and bin (specific dog poo bin)	No	NA	NA	NA	NA	NA	NA	NA	NA	NA	NA	NA	NA
2020/06/23 6:09:35 AM GMT+1	Cat	NA	NA	NA	NA	NA	NA	NA	NA	NA	NA	NA	NA	NA	NA	NA	NA	NA	NA	NA	NA	NA	NA	NA	NA	NA	NA	NA	NA	NA	NA	NA	NA	NA	NA	NA	NA	Large (above 4 kg)	NA	9	Yes	To prevent fleas (or other pests)	No	NA	Advocate;Bravecto	Bravecto	6	From a veterinary practice	No
2020/06/23 6:13:37 AM GMT+1	Cat	NA	NA	NA	NA	NA	NA	NA	NA	NA	NA	NA	NA	NA	NA	NA	NA	NA	NA	NA	NA	NA	NA	NA	NA	NA	NA	NA	NA	NA	NA	NA	NA	NA	NA	NA	NA	Small (below 4kg)	NA	3	Yes	Other reason	No	NA	Broadline	Broadline	1	Online	No
2020/06/23 6:18:02 AM GMT+1	Cat	NA	NA	NA	NA	NA	NA	NA	NA	NA	NA	NA	NA	NA	NA	NA	NA	NA	NA	NA	NA	NA	NA	NA	NA	NA	NA	NA	NA	NA	NA	NA	NA	NA	NA	NA	NA	Small (below 4kg)	3	7	No	NA	NA	NA	NA	NA	NA	NA	NA
2020/06/23 6:40:22 AM GMT+1	Dog	Large (20-40kg)	26	3	Yes	To prevent fleas (or other pests)	No	NA	Bravecto tablet;Simparica	Simparica	4	From a veterinary practice	NA	NA	NA	No	No	No	NA	No	NA	4	In their own bed	In their own bed	Every 2 weeks	Every day	Every month	In a bath, sink or shower	Every week or more	2 hours	3 hours	Mainly on unpaved surfaces like field margins, forest tracks or the beach	Yes, I will walk my dog in light drizzle	10	Bag and bin (specific dog poo bin);Bag and bin (home council bin)	Bag and bin (home council bin)	No	NA	NA	NA	NA	NA	NA	NA	NA	NA	NA	NA	NA
2020/06/23 6:47:13 AM GMT+1	Cat	NA	NA	NA	NA	NA	NA	NA	NA	NA	NA	NA	NA	NA	NA	NA	NA	NA	NA	NA	NA	NA	NA	NA	NA	NA	NA	NA	NA	NA	NA	NA	NA	NA	NA	NA	NA	Large (above 4 kg)	5	5	Yes	To prevent fleas (or other pests)	No	NA	Bravecto;Frontline or Frontline Combo	Bravecto	3	From a veterinary practice	No
2020/06/23 6:56:43 AM GMT+1	Cat	NA	NA	NA	NA	NA	NA	NA	NA	NA	NA	NA	NA	NA	NA	NA	NA	NA	NA	NA	NA	NA	NA	NA	NA	NA	NA	NA	NA	NA	NA	NA	NA	NA	NA	NA	NA	Large (above 4 kg)	5	8	Yes	In response to a flea infestation	No	NA	Frontline or Frontline Combo	Frontline or Frontline Combo	1	Online	Yes
2020/06/23 7:04:36 AM GMT+1	Dog	Large (20-40kg)	31	2	Yes	In response to other pests (eg ticks)	No	NA	Bravecto tablet	Bravecto tablet	4	From a veterinary practice	NA	NA	NA	No	No	No	NA	Yes	June;July	5	In their own bed;On the furniture;On the floor	On the floor	Every 6 months	Every week	Every 6 months	Outdoors	Every week or more	2 hours	3 hours	Mainly on unpaved surfaces like field margins, forest tracks or the beach	Yes, I walk my dog even if it is raining heavily and my dog gets completely wet	2	Bag and bin (specific dog poo bin);Bag and bin (home council bin);Straight in a bin (of any kind)	Bag and bin (home council bin)	No	NA	NA	NA	NA	NA	NA	NA	NA	NA	NA	NA	NA
2020/06/23 7:06:40 AM GMT+1	Cat	NA	NA	NA	NA	NA	NA	NA	NA	NA	NA	NA	NA	NA	NA	NA	NA	NA	NA	NA	NA	NA	NA	NA	NA	NA	NA	NA	NA	NA	NA	NA	NA	NA	NA	NA	NA	Large (above 4 kg)	4	10	Yes	To prevent fleas (or other pests)	No	NA	Advocate	Advocate	12	From a veterinary practice	Yes
2020/06/23 7:07:54 AM GMT+1	Dog	Small (4-10kg)	6.5	3	No	NA	NA	NA	NA	NA	NA	NA	NA	NA	NA	NA	No	No	NA	No	NA	None	In their own bed;On the furniture;On a family member's bed	On a family member's bed	Every 2 weeks	Every day	Every month	Outdoors	Every 6 months	1 hour	3 hours	Mainly on unpaved surfaces like field margins, forest tracks or the beach	Occasionally, but I try to avoid this	9	Bag and bin (specific dog poo bin);Bag and bin (home council bin)	Bag and bin (home council bin)	No	NA	NA	NA	NA	NA	NA	NA	NA	NA	NA	NA	NA
2020/06/23 7:08:11 AM GMT+1	Cat	NA	NA	NA	NA	NA	NA	NA	NA	NA	NA	NA	NA	NA	NA	NA	NA	NA	NA	NA	NA	NA	NA	NA	NA	NA	NA	NA	NA	NA	NA	NA	NA	NA	NA	NA	NA	Large (above 4 kg)	5	8	Yes	In response other pests (eg ticks)	No	NA	Bravecto;Broadline;Fipnil/Fipralone/Fiprene/ Fiprex/ Fiproclear/Fiprofile/Fipronil/Fiprotec/Fiproxole/Fleanil/Fleascreen/Flevox/Flick/Fyperix	Bravecto	6	From a veterinary practice	Yes
2020/06/23 7:11:29 AM GMT+1	Dog	Large (20-40kg)	40	2	Yes	Other reason	No	NA	Advocate	Advocate	12	From a veterinary practice	Yes	Yes	Yes	Maybe	No	No	NA	Yes	June	4	In their own bed;On the floor;Outdoors kennel/building	In their own bed	Every 2 weeks	Every day	Every 3 months	Outdoors	Every 6 months	2 hours	3 hours	Mainly on unpaved surfaces like field margins, forest tracks or the beach	Yes, I walk my dog even if it is raining heavily and my dog gets completely wet	7	Bag and bin (specific dog poo bin);Bag and bin (home council bin)	Bag and bin (home council bin)	No	NA	NA	NA	NA	NA	NA	NA	NA	NA	NA	NA	NA
2020/06/23 7:11:54 AM GMT+1	Dog	Large (20-40kg)	30	1	Yes	To prevent fleas (or other pests)	No	NA	Simparica	Simparica	12	From a veterinary practice	NA	NA	NA	No	No	No	NA	No	NA	3	In their own bed;On a family member's bed;On the floor	On the floor	Every 6 months	Every day	Every week or more	Outdoors	Every week or more	2 hours	6 hours	Mainly on unpaved surfaces like field margins, forest tracks or the beach	Yes, I walk my dog even if it is raining heavily and my dog gets completely wet	9	Bag and bin (specific dog poo bin);Bag and bin (home council bin)	Bag and bin (specific dog poo bin)	No	NA	NA	NA	NA	NA	NA	NA	NA	NA	NA	NA	NA
2020/06/23 7:13:06 AM GMT+1	Cat	NA	NA	NA	NA	NA	NA	NA	NA	NA	NA	NA	NA	NA	NA	NA	NA	NA	NA	NA	NA	NA	NA	NA	NA	NA	NA	NA	NA	NA	NA	NA	NA	NA	NA	NA	NA	Small (below 4kg)	NA	14	Yes	In response to a flea infestation	No	NA	Bravecto	Bravecto	2	From a veterinary practice	No
2020/06/23 7:14:20 AM GMT+1	Dog	Small (4-10kg)	7.4	4	Yes	In response to a flea infestation	No	NA	Simparica	Simparica	2	From a veterinary practice	Don't know	No	NA	No	Yes	No	NA	No	NA	None	On a family member's bed	On a family member's bed	Every 3 months	Every day	Every week or more	In a bath, sink or shower	Every week or more	1 hour	2 hours	An equal mixture of the above	Yes, I walk my dog even if it is raining heavily and my dog gets completely wet	9	Bag and bin (specific dog poo bin);Bag and bin (home council bin);Straight in a bin (of any kind)	Straight in a bin (of any kind)	No	NA	NA	NA	NA	NA	NA	NA	NA	NA	NA	NA	NA
2020/06/23 7:14:47 AM GMT+1	Dog	Large (20-40kg)	32	6	No	NA	NA	NA	NA	NA	NA	NA	NA	NA	NA	NA	No	No	NA	No	NA	2	In their own bed;On the furniture;On a family member's bed;On the floor	In their own bed	Every month	Every day	Every month	In a bath, sink or shower	Every 2 weeks	2 hours	6 hours	Mainly on unpaved surfaces like field margins, forest tracks or the beach	Occasionally, but I try to avoid this	10	Bag and bin (specific dog poo bin);Bag and bin (home council bin)	Bag and bin (specific dog poo bin)	No	NA	NA	NA	NA	NA	NA	NA	NA	NA	NA	NA	NA
2020/06/23 7:16:11 AM GMT+1	Dog	Small (4-10kg)	11	10	No	NA	NA	NA	NA	NA	NA	NA	NA	NA	NA	NA	No	No	NA	No	NA	None	In their own bed;On the furniture;On the floor	In their own bed	Every month	Every day	Every 2 weeks	In a bath, sink or shower	Never	1 hour	2 hours	Mainly on unpaved surfaces like field margins, forest tracks or the beach	Yes, I walk my dog even if it is raining heavily and my dog gets completely wet	10	Bag and bin (specific dog poo bin);Flush down the toilet	Flush down the toilet	No	NA	NA	NA	NA	NA	NA	NA	NA	NA	NA	NA	NA
2020/06/23 7:18:01 AM GMT+1	Dog	Medium (10-20 kg)	20	1	Yes	To prevent fleas (or other pests)	No	NA	Advantage	Advantage	12	Online	No	Yes	Yes	No	No	No	NA	No	NA	4	In a crate	In a crate	Every week or more	Every day	Every month	In a bath, sink or shower	Never	30 minutes	1 hour	Mainly on paved surfaces	Yes, I will walk my dog in light drizzle	10	Bag and bin (specific dog poo bin)	Bag and bin (specific dog poo bin)	No	NA	NA	NA	NA	NA	NA	NA	NA	NA	NA	NA	NA
2020/06/23 7:20:42 AM GMT+1	Dog	Medium (10-20 kg)	12	8	Yes	In response to other pests (eg ticks)	No	NA	Effipro Spot On	Effipro Spot On	3	From a veterinary practice	Yes	Yes	Yes	No	No	No	NA	No	NA	3	In their own bed;On the furniture;On the floor	On the furniture	Every 6 months	Every day	Every 3 months	At the groomers	Never	1 hour	2 hours	Mainly on unpaved surfaces like field margins, forest tracks or the beach	Yes, I walk my dog even if it is raining heavily and my dog gets completely wet	8	Bag and bin (specific dog poo bin);Bag and bin (home council bin)	Bag and bin (specific dog poo bin)	No	NA	NA	NA	NA	NA	NA	NA	NA	NA	NA	NA	NA
2020/06/23 7:28:39 AM GMT+1	Dog	Medium (10-20 kg)	18	5	Yes	To prevent fleas (or other pests)	No	NA	Advocate	Advocate	8	From a veterinary practice	No	Yes	Yes	No	No	No	NA	No	NA	6	On a family member's bed	On a family member's bed	Every month	Every day	Every 2 weeks	At the groomers	Never	30 minutes	2 hours	An equal mixture of the above	Yes, I walk my dog even if it is raining heavily and my dog gets completely wet	10	Bag and bin (specific dog poo bin);Bag and bin (home council bin)	Bag and bin (home council bin)	No	NA	NA	NA	NA	NA	NA	NA	NA	NA	NA	NA	NA
2020/06/23 7:30:41 AM GMT+1	Dog	Medium (10-20 kg)	10	7	Yes	To prevent fleas (or other pests)	No	NA	Bravecto tablet	Bravecto tablet	4	From a veterinary practice	NA	NA	NA	No	No	No	NA	No	NA	4	In their own bed	In their own bed	Every month	Every day	Every 2 weeks	In a bath, sink or shower	Never	2 hours	3 hours	Mainly on unpaved surfaces like field margins, forest tracks or the beach	Yes, I walk my dog even if it is raining heavily and my dog gets completely wet	10	Bag and bin (specific dog poo bin);Bag and bin (home council bin)	Bag and bin (specific dog poo bin)	No	NA	NA	NA	NA	NA	NA	NA	NA	NA	NA	NA	NA
2020/06/23 7:30:56 AM GMT+1	Dog	Medium (10-20 kg)	21	8	Yes	To prevent fleas (or other pests)	No	NA	Simparica	Simparica	12	From a veterinary practice	NA	NA	NA	No	No	No	NA	Yes	April;May;June;July;August	12	In their own bed;On the floor	In their own bed	Every 3 months	Every month	Every 3 months	In a bath, sink or shower	Every month	30 minutes	1 hour	An equal mixture of the above	Yes, I walk my dog even if it is raining heavily and my dog gets completely wet	9	Bag and bin (specific dog poo bin);Bag and bin (home council bin)	Bag and bin (specific dog poo bin)	No	NA	NA	NA	NA	NA	NA	NA	NA	NA	NA	NA	NA
2020/06/23 7:31:39 AM GMT+1	Cat	NA	NA	NA	NA	NA	NA	NA	NA	NA	NA	NA	NA	NA	NA	NA	NA	NA	NA	NA	NA	NA	NA	NA	NA	NA	NA	NA	NA	NA	NA	NA	NA	NA	NA	NA	NA	Small (below 4kg)	3	3	Yes	To prevent fleas (or other pests)	No	NA	Advocate;Seresto collar	Seresto collar	4	From a veterinary practice	No
2020/06/23 7:35:04 AM GMT+1	Dog	Medium (10-20 kg)	15	2	Yes	To prevent fleas (or other pests)	No	NA	Advocate	Advocate	12	From a veterinary practice	No	Yes	Yes	No	No	No	NA	No	NA	4	On a family member's bed	On a family member's bed	Every month	Every day	Every month	In a bath, sink or shower	Less than once a year	3 hours	6 hours	An equal mixture of the above	Yes, I walk my dog even if it is raining heavily and my dog gets completely wet	10	Bag and bin (specific dog poo bin);Bag and bin (home council bin)	Bag and bin (home council bin)	No	NA	NA	NA	NA	NA	NA	NA	NA	NA	NA	NA	NA
2020/06/23 7:35:20 AM GMT+1	Dog	Medium (10-20 kg)	14	4	Yes	To prevent fleas (or other pests)	No	NA	Bravecto tablet;Seresto collar	Stronghold	3	From a veterinary practice	NA	NA	NA	No	No	No	NA	Yes	April;May;June	4	In their own bed	In their own bed	Don't know	Every week	Every 2 weeks	In a bath, sink or shower	Every 3 months	30 minutes	6 hours	Mainly on unpaved surfaces like field margins, forest tracks or the beach	Yes, I walk my dog even if it is raining heavily and my dog gets completely wet	8	Bag and bin (specific dog poo bin);Bag and bin (home council bin)	Bag and bin (home council bin)	No	NA	NA	NA	NA	NA	NA	NA	NA	NA	NA	NA	NA
2020/06/23 7:38:53 AM GMT+1	Dog	Small (4-10kg)	4.5	1	Yes	To prevent fleas (or other pests)	No	NA	NexGard Spectra	NexGard Spectra	12	From a veterinary practice	NA	NA	NA	No	No	No	NA	No	NA	12	In their own bed;On the furniture;On a family member's bed;On the floor	On a family member's bed	Every 2 weeks	Every day	Every 2 weeks	In a bath, sink or shower	Never	1 hour	2 hours	An equal mixture of the above	Occasionally, but I try to avoid this	10	Bag and bin (specific dog poo bin);Bag and bin (home council bin)	Bag and bin (home council bin)	No	NA	NA	NA	NA	NA	NA	NA	NA	NA	NA	NA	NA
2020/06/23 7:40:31 AM GMT+1	Dog	Small (4-10kg)	6	3	Yes	To prevent fleas (or other pests)	No	NA	Bob Martin Clear /Clear Plus (Fipronil)	Bob Martin Clear /Clear Plus (Fipronil)	4	From a petshop	Yes	Yes	Yes	Yes	No	No	NA	No	NA	2	On the furniture;On a family member's bed	On a family member's bed	Every 2 weeks	Every day	Every month	In a bath, sink or shower	Once a year	1 hour	3 hours	An equal mixture of the above	Yes, I will walk my dog in light drizzle	10	Bag and bin (specific dog poo bin);Bag and bin (home council bin)	Bag and bin (home council bin)	No	NA	NA	NA	NA	NA	NA	NA	NA	NA	NA	NA	NA
2020/06/23 7:42:11 AM GMT+1	Cat	NA	NA	NA	NA	NA	NA	NA	NA	NA	NA	NA	NA	NA	NA	NA	NA	NA	NA	NA	NA	NA	NA	NA	NA	NA	NA	NA	NA	NA	NA	NA	NA	NA	NA	NA	NA	Large (above 4 kg)	5.5	3	Yes	To prevent fleas (or other pests)	No	NA	Advantage	Advantage	5	Online	No
2020/06/23 7:42:19 AM GMT+1	Dog	Large (20-40kg)	31	2	No	NA	NA	NA	NA	NA	NA	NA	NA	NA	NA	NA	No	No	NA	No	NA	3	On a family member's bed	On a family member's bed	Every week or more	Every day	Less than once a year	In a bath, sink or shower	Less than once a year	30 minutes	3 hours	Mainly on unpaved surfaces like field margins, forest tracks or the beach	Yes, I walk my dog even if it is raining heavily and my dog gets completely wet	5	Bag and bin (specific dog poo bin)	Bag and bin (specific dog poo bin)	No	NA	NA	NA	NA	NA	NA	NA	NA	NA	NA	NA	NA
2020/06/23 7:43:46 AM GMT+1	Dog	Small (4-10kg)	4.8	1	Yes	In response to a flea infestation	No	NA	Bob Martin Clear /Clear Plus (Fipronil);Frontline or Frontline Combo spot on	Frontline or Frontline Combo spot on	6	From a petshop	No	Yes	Yes	No	Yes	Yes	February;October;November	No	NA	2	In their own bed;In a crate	In a crate	Every month	Every day	Every month	In a bath, sink or shower	Never	30 minutes	2 hours	An equal mixture of the above	Yes, I will walk my dog in light drizzle	10	Bag and bin (specific dog poo bin);Bag and bin (home council bin);Straight in a bin (of any kind)	Bag and bin (specific dog poo bin)	No	NA	NA	NA	NA	NA	NA	NA	NA	NA	NA	NA	NA
2020/06/23 7:43:57 AM GMT+1	Dog	Large (20-40kg)	30	9	Yes	To prevent fleas (or other pests)	No	NA	NexGard Spectra	NexGard Spectra	12	From a veterinary practice	No	Yes	Yes	No	No	No	NA	No	NA	12	In their own bed	In their own bed	Every 3 months	Every day	Every 3 months	In a bath, sink or shower	Every 2 weeks	2 hours	2 hours	Mainly on unpaved surfaces like field margins, forest tracks or the beach	Yes, I will walk my dog in light drizzle	9	Bag and bin (specific dog poo bin)	Bag and bin (specific dog poo bin)	No	NA	NA	NA	NA	NA	NA	NA	NA	NA	NA	NA	NA
2020/06/23 7:45:05 AM GMT+1	Cat	NA	NA	NA	NA	NA	NA	NA	NA	NA	NA	NA	NA	NA	NA	NA	NA	NA	NA	NA	NA	NA	NA	NA	NA	NA	NA	NA	NA	NA	NA	NA	NA	NA	NA	NA	NA	Large (above 4 kg)	5.5	10	Yes	To prevent fleas (or other pests)	No	NA	Bravecto	Bravecto	3	From a veterinary practice	Yes
2020/06/23 7:46:34 AM GMT+1	Cat	NA	NA	NA	NA	NA	NA	NA	NA	NA	NA	NA	NA	NA	NA	NA	NA	NA	NA	NA	NA	NA	NA	NA	NA	NA	NA	NA	NA	NA	NA	NA	NA	NA	NA	NA	NA	Small (below 4kg)	NA	6	Yes	To prevent fleas (or other pests)	No	NA	Advocate;Advantage	Advocate	12	From a veterinary practice	Yes
2020/06/23 7:48:08 AM GMT+1	Dog	Medium (10-20 kg)	17	4	Yes	To prevent fleas (or other pests)	No	NA	Bravecto tablet	Bravecto tablet	4	From a veterinary practice	NA	NA	NA	No	No	No	NA	Yes	Don't know	4	Outdoors kennel/building	Outdoors kennel/building	Every 3 months	Every week	Never	NA	Every week or more	2 hours	6 hours	Mainly on unpaved surfaces like field margins, forest tracks or the beach	Yes, I walk my dog even if it is raining heavily and my dog gets completely wet	1	Bag and bin (specific dog poo bin)	Bag and bin (specific dog poo bin)	Yes	NA	NA	NA	NA	NA	NA	NA	NA	NA	NA	NA	NA
2020/06/23 7:48:21 AM GMT+1	Cat	NA	NA	NA	NA	NA	NA	NA	NA	NA	NA	NA	NA	NA	NA	NA	NA	NA	NA	NA	NA	NA	NA	NA	NA	NA	NA	NA	NA	NA	NA	NA	NA	NA	NA	NA	NA	Small (below 4kg)	NA	11	Yes	In response to a flea infestation	No	NA	Fipnil/Fipralone/Fiprene/ Fiprex/ Fiproclear/Fiprofile/Fipronil/Fiprotec/Fiproxole/Fleanil/Fleascreen/Flevox/Flick/Fyperix	Frontline generic	1	From a veterinary practice	No
2020/06/23 7:48:48 AM GMT+1	Cat	NA	NA	NA	NA	NA	NA	NA	NA	NA	NA	NA	NA	NA	NA	NA	NA	NA	NA	NA	NA	NA	NA	NA	NA	NA	NA	NA	NA	NA	NA	NA	NA	NA	NA	NA	NA	Small (below 4kg)	3.5	10	Yes	In response to a flea infestation	No	NA	Credelio	Credelio	2	From a veterinary practice	No
2020/06/23 7:48:52 AM GMT+1	Dog	Medium (10-20 kg)	18	6	Yes	To prevent fleas (or other pests)	No	NA	Advocate;Advantage;Frontline or Frontline Combo spot on	Frontline or Frontline Combo spot on	10	Online	Yes	Yes	Yes	No	No	No	NA	Yes	June	10	In their own bed;On the furniture;On a family member's bed;On the floor	On a family member's bed	Every month	Every day	Every 2 weeks	In a bath, sink or shower	Every 2 weeks	30 minutes	1 hour	Mainly on paved surfaces	Yes, I walk my dog even if it is raining heavily and my dog gets completely wet	10	Bag and bin (specific dog poo bin);Bag and bin (home council bin)	Bag and bin (home council bin)	No	NA	NA	NA	NA	NA	NA	NA	NA	NA	NA	NA	NA
2020/06/23 7:48:55 AM GMT+1	Cat	NA	NA	NA	NA	NA	NA	NA	NA	NA	NA	NA	NA	NA	NA	NA	NA	NA	NA	NA	NA	NA	NA	NA	NA	NA	NA	NA	NA	NA	NA	NA	NA	NA	NA	NA	NA	Large (above 4 kg)	4.1	13	Yes	To prevent fleas (or other pests)	No	NA	Seresto collar	Seresto collar	2	From a veterinary practice	NA
2020/06/23 7:52:01 AM GMT+1	Dog	Medium (10-20 kg)	20	13	Yes	To prevent fleas (or other pests)	No	NA	Advocate;Advantix;Seresto collar	Advocate	2	From a veterinary practice	Yes	Yes	Yes	No	No	No	NA	Yes	May;June;July	5	In their own bed;On a family member's bed	On a family member's bed	Every month	Every day	Every 3 months	In a bath, sink or shower	Every month	2 hours	6 hours	Mainly on unpaved surfaces like field margins, forest tracks or the beach	Yes, I walk my dog even if it is raining heavily and my dog gets completely wet	6	Bag and bin (home council bin)	Bag and bin (home council bin)	No	NA	NA	NA	NA	NA	NA	NA	NA	NA	NA	NA	NA
2020/06/23 7:54:12 AM GMT+1	Dog	Small (4-10kg)	8	5	Yes	In response to a flea infestation	No	NA	Comfortis	Advocate	8	From a veterinary practice	Yes	Yes	Yes	No	Yes	Yes	March	No	NA	3	On a family member's bed	On a family member's bed	Every 2 weeks	Every day	Every month	In a bath, sink or shower	Less than once a year	1 hour	3 hours	An equal mixture of the above	Yes, I will walk my dog in light drizzle	10	Bag and bin (specific dog poo bin);Straight in a bin (of any kind)	Bag and bin (specific dog poo bin)	No	NA	NA	NA	NA	NA	NA	NA	NA	NA	NA	NA	NA
2020/06/23 8:01:54 AM GMT+1	Dog	Medium (10-20 kg)	NA	11	Yes	To prevent fleas (or other pests)	No	NA	Don't know	Don't know	4	From a veterinary practice	Yes	No	NA	No	No	No	NA	No	NA	None	In their own bed	In their own bed	Every 3 months	Every day	Every month	In a bath, sink or shower	Never	1 hour	2 hours	An equal mixture of the above	Yes, I walk my dog even if it is raining heavily and my dog gets completely wet	9	Bag and bin (specific dog poo bin);Bag and bin (home council bin);Flush down the toilet	Bag and bin (specific dog poo bin)	No	NA	NA	NA	NA	NA	NA	NA	NA	NA	NA	NA	NA
2020/06/23 8:03:09 AM GMT+1	Cat	NA	NA	NA	NA	NA	NA	NA	NA	NA	NA	NA	NA	NA	NA	NA	NA	NA	NA	NA	NA	NA	NA	NA	NA	NA	NA	NA	NA	NA	NA	NA	NA	NA	NA	NA	NA	Small (below 4kg)	4	15	Yes	To prevent fleas (or other pests)	No	NA	Credelio	Credelio	3	From a veterinary practice	NA
2020/06/23 8:05:25 AM GMT+1	Cat	NA	NA	NA	NA	NA	NA	NA	NA	NA	NA	NA	NA	NA	NA	NA	NA	NA	NA	NA	NA	NA	NA	NA	NA	NA	NA	NA	NA	NA	NA	NA	NA	NA	NA	NA	NA	Large (above 4 kg)	4	6	Yes	To prevent fleas (or other pests)	No	NA	Credelio	Credelio	12	From a veterinary practice	NA
2020/06/23 8:05:29 AM GMT+1	Cat	NA	NA	NA	NA	NA	NA	NA	NA	NA	NA	NA	NA	NA	NA	NA	NA	NA	NA	NA	NA	NA	NA	NA	NA	NA	NA	NA	NA	NA	NA	NA	NA	NA	NA	NA	NA	Large (above 4 kg)	NA	14	Yes	To prevent fleas (or other pests)	No	NA	Stronghold	Stronghold	12	From a veterinary practice	No
2020/06/23 8:05:41 AM GMT+1	Cat	NA	NA	NA	NA	NA	NA	NA	NA	NA	NA	NA	NA	NA	NA	NA	NA	NA	NA	NA	NA	NA	NA	NA	NA	NA	NA	NA	NA	NA	NA	NA	NA	NA	NA	NA	NA	Small (below 4kg)	NA	4	Yes	Other reason	No	NA	Seresto collar	Seresto collar	1	From a veterinary practice	NA
2020/06/23 8:06:59 AM GMT+1	Cat	NA	NA	NA	NA	NA	NA	NA	NA	NA	NA	NA	NA	NA	NA	NA	NA	NA	NA	NA	NA	NA	NA	NA	NA	NA	NA	NA	NA	NA	NA	NA	NA	NA	NA	NA	NA	Small (below 4kg)	3.8	3	Yes	To prevent fleas (or other pests)	No	NA	Advantage	Advantage	5	From a petshop	Yes
2020/06/23 8:07:41 AM GMT+1	Dog	Medium (10-20 kg)	NA	4	Yes	To prevent fleas (or other pests)	No	NA	Bravecto tablet	Bravecto tablet	4	From a veterinary practice	NA	NA	NA	No	No	No	NA	No	NA	4	In their own bed	In their own bed	Every month	Every day	Every month	Outdoors	Never	2 hours	3 hours	Mainly on unpaved surfaces like field margins, forest tracks or the beach	Yes, I walk my dog even if it is raining heavily and my dog gets completely wet	10	Bag and bin (specific dog poo bin)	Bag and bin (specific dog poo bin)	No	NA	NA	NA	NA	NA	NA	NA	NA	NA	NA	NA	NA
2020/06/23 8:10:06 AM GMT+1	Dog	Large (20-40kg)	30	5	Yes	To prevent fleas (or other pests)	No	NA	Credelio;Simparica	Simparica	12	From a veterinary practice	NA	NA	NA	No	No	No	NA	No	NA	12	In their own bed;On the furniture;On the floor;Outdoors kennel/building	In their own bed	Every month	Every day	Once a year	Outdoors	Every month	2 hours	6 hours	An equal mixture of the above	Yes, I walk my dog even if it is raining heavily and my dog gets completely wet	10	Bag and bin (specific dog poo bin);Bag and bin (home council bin)	Bag and bin (home council bin)	No	NA	NA	NA	NA	NA	NA	NA	NA	NA	NA	NA	NA
2020/06/23 8:10:32 AM GMT+1	Cat	NA	NA	NA	NA	NA	NA	NA	NA	NA	NA	NA	NA	NA	NA	NA	NA	NA	NA	NA	NA	NA	NA	NA	NA	NA	NA	NA	NA	NA	NA	NA	NA	NA	NA	NA	NA	Large (above 4 kg)	4.6	9	Yes	To prevent fleas (or other pests)	No	NA	Bravecto	Bravecto	4	From a veterinary practice	Yes
2020/06/23 8:13:15 AM GMT+1	Cat	NA	NA	NA	NA	NA	NA	NA	NA	NA	NA	NA	NA	NA	NA	NA	NA	NA	NA	NA	NA	NA	NA	NA	NA	NA	NA	NA	NA	NA	NA	NA	NA	NA	NA	NA	NA	Large (above 4 kg)	7.8	1	Yes	In response to a flea infestation	Yes	NA	Johnson's flea tablets	Johnson's	5	From a petshop	Don't know
2020/06/23 8:13:42 AM GMT+1	Cat	NA	NA	NA	NA	NA	NA	NA	NA	NA	NA	NA	NA	NA	NA	NA	NA	NA	NA	NA	NA	NA	NA	NA	NA	NA	NA	NA	NA	NA	NA	NA	NA	NA	NA	NA	NA	Large (above 4 kg)	4.5	12	Yes	In response to a flea infestation	No	NA	Advocate	Advocate	3	From a veterinary practice	Yes
2020/06/23 8:20:08 AM GMT+1	Cat	NA	NA	NA	NA	NA	NA	NA	NA	NA	NA	NA	NA	NA	NA	NA	NA	NA	NA	NA	NA	NA	NA	NA	NA	NA	NA	NA	NA	NA	NA	NA	NA	NA	NA	NA	NA	Small (below 4kg)	2.9	<1	Yes	To prevent fleas (or other pests)	No	NA	Stronghold	Stronghold	12	From a veterinary practice	No
2020/06/23 8:20:09 AM GMT+1	Dog	Extra large (over 40 kg)	42	8	No	NA	NA	NA	NA	NA	NA	NA	NA	NA	NA	NA	No	No	NA	No	NA	None	On the furniture	On the furniture	Every month	Every day	Every month	In a bath, sink or shower	Every month	2 hours	3 hours	Mainly on unpaved surfaces like field margins, forest tracks or the beach	Yes, I will walk my dog in light drizzle	10	Bag and bin (specific dog poo bin);Bag and bin (home council bin);Straight in a bin (of any kind)	Bag and bin (home council bin)	No	NA	NA	NA	NA	NA	NA	NA	NA	NA	NA	NA	NA
2020/06/23 8:26:17 AM GMT+1	Cat	NA	NA	NA	NA	NA	NA	NA	NA	NA	NA	NA	NA	NA	NA	NA	NA	NA	NA	NA	NA	NA	NA	NA	NA	NA	NA	NA	NA	NA	NA	NA	NA	NA	NA	NA	NA	Large (above 4 kg)	5.5	17	Yes	To prevent fleas (or other pests)	No	NA	Advantage	Advantage	12	From a veterinary practice	Don't know
2020/06/23 8:30:12 AM GMT+1	Dog	Large (20-40kg)	22	4	Yes	To prevent fleas (or other pests)	No	NA	NexGard Spectra	NexGard Spectra	6	From a veterinary practice	NA	NA	NA	No	No	No	NA	Yes	June	2	In their own bed;On the furniture	In their own bed	Every 3 months	Every day	Every 3 months	In a bath, sink or shower	Never	1 hour	2 hours	Mainly on unpaved surfaces like field margins, forest tracks or the beach	Yes, I will walk my dog in light drizzle	9	Bag and bin (specific dog poo bin);Bag and bin (home council bin)	Bag and bin (home council bin)	No	NA	NA	NA	NA	NA	NA	NA	NA	NA	NA	NA	NA
2020/06/23 8:31:33 AM GMT+1	Dog	Medium (10-20 kg)	16	2	Yes	In response to a flea infestation	No	NA	Bravecto tablet	Bravecto tablet	4	From a veterinary practice	NA	NA	NA	No	No	No	NA	No	NA	4	In their own bed;On the furniture;On a family member's bed	On the furniture	Every month	Every day	Every week or more	At the groomers	Less than once a year	2 hours	3 hours	An equal mixture of the above	Occasionally, but I try to avoid this	10	Bag and bin (specific dog poo bin);Bag and bin (home council bin);Straight in a bin (of any kind)	Bag and bin (home council bin)	No	NA	NA	NA	NA	NA	NA	NA	NA	NA	NA	NA	NA
2020/06/23 8:32:44 AM GMT+1	Dog	Large (20-40kg)	35	5	No	NA	NA	NA	NA	NA	NA	NA	NA	NA	NA	NA	No	No	NA	No	NA	2	In a crate	In a crate	Every month	Every day	Every 3 months	At the groomers	Never	1 hour	2 hours	Mainly on unpaved surfaces like field margins, forest tracks or the beach	Yes, I will walk my dog in light drizzle	7	Bag and bin (home council bin)	Bag and bin (home council bin)	No	NA	NA	NA	NA	NA	NA	NA	NA	NA	NA	NA	NA
2020/06/23 8:33:25 AM GMT+1	Cat	NA	NA	NA	NA	NA	NA	NA	NA	NA	NA	NA	NA	NA	NA	NA	NA	NA	NA	NA	NA	NA	NA	NA	NA	NA	NA	NA	NA	NA	NA	NA	NA	NA	NA	NA	NA	Large (above 4 kg)	5	16	Yes	In response to a flea infestation	No	NA	Don't know	Don't know	2	From a veterinary practice	No
2020/06/23 8:33:33 AM GMT+1	Cat	NA	NA	NA	NA	NA	NA	NA	NA	NA	NA	NA	NA	NA	NA	NA	NA	NA	NA	NA	NA	NA	NA	NA	NA	NA	NA	NA	NA	NA	NA	NA	NA	NA	NA	NA	NA	Large (above 4 kg)	5.1	12	Yes	To prevent fleas (or other pests)	No	NA	Stronghold	Stronghold	6	From a veterinary practice	Yes
2020/06/23 8:35:57 AM GMT+1	Cat	NA	NA	NA	NA	NA	NA	NA	NA	NA	NA	NA	NA	NA	NA	NA	NA	NA	NA	NA	NA	NA	NA	NA	NA	NA	NA	NA	NA	NA	NA	NA	NA	NA	NA	NA	NA	Large (above 4 kg)	4.4	4	Yes	To prevent fleas (or other pests)	No	NA	Broadline	Broadline	3	Online	Yes
2020/06/23 8:36:45 AM GMT+1	Dog	Large (20-40kg)	25	4	Yes	To prevent fleas (or other pests)	No	NA	Advocate	Advocate	12	From a veterinary practice	Yes	No	NA	No	No	No	NA	No	NA	4	On the furniture;In a crate	In a crate	Every week or more	Every day	Every 3 months	In a bath, sink or shower	Once a year	1 hour	2 hours	Mainly on unpaved surfaces like field margins, forest tracks or the beach	Yes, I walk my dog even if it is raining heavily and my dog gets completely wet	10	Bag and bin (home council bin)	Bag and bin (home council bin)	No	NA	NA	NA	NA	NA	NA	NA	NA	NA	NA	NA	NA
2020/06/23 8:43:39 AM GMT+1	Dog	Large (20-40kg)	22	7	Yes	In response to other pests (eg ticks)	No	NA	Seresto collar	Seresto collar	2	From a veterinary practice	NA	NA	NA	No	No	No	NA	Yes	May;June	1	On the furniture;On the floor	On the furniture	Every 2 weeks	Every 2 days	Every 6 months	Outdoors	Less than once a year	1 hour	12 hours	Mainly on unpaved surfaces like field margins, forest tracks or the beach	Yes, I walk my dog even if it is raining heavily and my dog gets completely wet	10	Bury in the ground	Bury in the ground	No	NA	NA	NA	NA	NA	NA	NA	NA	NA	NA	NA	NA
2020/06/23 8:48:55 AM GMT+1	Cat	NA	NA	NA	NA	NA	NA	NA	NA	NA	NA	NA	NA	NA	NA	NA	NA	NA	NA	NA	NA	NA	NA	NA	NA	NA	NA	NA	NA	NA	NA	NA	NA	NA	NA	NA	NA	Large (above 4 kg)	NA	8	Yes	In response to a flea infestation	No	NA	Fipnil/Fipralone/Fiprene/ Fiprex/ Fiproclear/Fiprofile/Fipronil/Fiprotec/Fiproxole/Fleanil/Fleascreen/Flevox/Flick/Fyperix	Frontline generic	4	From a petshop	Yes
2020/06/23 8:50:33 AM GMT+1	Dog	Large (20-40kg)	26	7	No	NA	NA	NA	NA	NA	NA	NA	NA	NA	NA	NA	No	No	NA	No	NA	4	In their own bed;On the furniture;On the floor	In their own bed	Every 6 months	Every day	Never	NA	Never	1 hour	1 hour	An equal mixture of the above	Yes, I walk my dog even if it is raining heavily and my dog gets completely wet	10	Bag and bin (specific dog poo bin);Flush down the toilet	Bag and bin (specific dog poo bin)	No	NA	NA	NA	NA	NA	NA	NA	NA	NA	NA	NA	NA
2020/06/23 8:56:40 AM GMT+1	Dog	Medium (10-20 kg)	NA	<1	Yes	In response to other pests (eg ticks)	No	NA	Frontline or Frontline Combo spot on;NexGard	Frontline or Frontline Combo spot on	9	Online	Don't know	NA	NA	No	No	No	NA	No	NA	9	In their own bed;On the furniture;In a crate	In their own bed	Every week or more	Every day	Every 2 weeks	Outdoors	Less than once a year	1 hour	6 hours	Mainly on unpaved surfaces like field margins, forest tracks or the beach	Yes, I will walk my dog in light drizzle	10	Bag and bin (specific dog poo bin);Bag and bin (home council bin);Straight in a bin (of any kind)	Bag and bin (home council bin)	No	NA	NA	NA	NA	NA	NA	NA	NA	NA	NA	NA	NA
2020/06/23 8:59:10 AM GMT+1	Dog	Medium (10-20 kg)	12.5	<1	Yes	To prevent fleas (or other pests)	No	NA	Stronghold	Stronghold	12	From a veterinary practice	No	Yes	Yes	No	No	Yes	April	No	NA	12	In a crate	In a crate	Every month	Every day	Every week or more	In a bath, sink or shower	Never	30 minutes	2 hours	An equal mixture of the above	Yes, I walk my dog even if it is raining heavily and my dog gets completely wet	10	Bag and bin (home council bin);Straight in a bin (of any kind)	Bag and bin (home council bin)	No	NA	NA	NA	NA	NA	NA	NA	NA	NA	NA	NA	NA
2020/06/23 9:02:48 AM GMT+1	Dog	Small (4-10kg)	6.5	10	Yes	To prevent fleas (or other pests)	No	NA	NexGard Spectra	NexGard Spectra	12	From a veterinary practice	NA	NA	NA	No	Don't know	No	NA	No	NA	3	In their own bed;On the furniture;On a family member's bed;On the floor	In their own bed	Once a year	Every day	Every 3 months	At the groomers	Never	2 hours	3 hours	Mainly on unpaved surfaces like field margins, forest tracks or the beach	Yes, I walk my dog even if it is raining heavily and my dog gets completely wet	10	Bag and bin (specific dog poo bin);Bag and bin (home council bin);Straight in a bin (of any kind)	Bag and bin (specific dog poo bin)	No	NA	NA	NA	NA	NA	NA	NA	NA	NA	NA	NA	NA
2020/06/23 9:06:04 AM GMT+1	Cat	NA	NA	NA	NA	NA	NA	NA	NA	NA	NA	NA	NA	NA	NA	NA	NA	NA	NA	NA	NA	NA	NA	NA	NA	NA	NA	NA	NA	NA	NA	NA	NA	NA	NA	NA	NA	Large (above 4 kg)	8	12	Yes	In response to a flea infestation	No	NA	Frontline or Frontline Combo	Frontline or Frontline Combo	1	From a veterinary practice	Yes
2020/06/23 9:08:54 AM GMT+1	Cat	NA	NA	NA	NA	NA	NA	NA	NA	NA	NA	NA	NA	NA	NA	NA	NA	NA	NA	NA	NA	NA	NA	NA	NA	NA	NA	NA	NA	NA	NA	NA	NA	NA	NA	NA	NA	Large (above 4 kg)	7.3	8	Yes	To prevent fleas (or other pests)	No	NA	Stronghold	Stronghold	10	From a veterinary practice	Yes
2020/06/23 9:09:58 AM GMT+1	Cat	NA	NA	NA	NA	NA	NA	NA	NA	NA	NA	NA	NA	NA	NA	NA	NA	NA	NA	NA	NA	NA	NA	NA	NA	NA	NA	NA	NA	NA	NA	NA	NA	NA	NA	NA	NA	Small (below 4kg)	NA	10	Yes	To prevent fleas (or other pests)	No	NA	Frontline or Frontline Combo;Stronghold	Stronghold	4	From a veterinary practice	Yes
2020/06/23 9:12:39 AM GMT+1	Dog	Medium (10-20 kg)	19.5	5	No	NA	NA	NA	NA	NA	NA	NA	NA	NA	NA	NA	No	No	NA	No	NA	None	In their own bed;On the furniture;On a family member's bed;In a crate	On a family member's bed	Every 3 months	Every day	Every 6 months	In a bath, sink or shower	Every month	1 hour	3 hours	Mainly on unpaved surfaces like field margins, forest tracks or the beach	Yes, I walk my dog even if it is raining heavily and my dog gets completely wet	9	Bag and bin (specific dog poo bin);Bag and bin (home council bin)	Bag and bin (home council bin)	No	NA	NA	NA	NA	NA	NA	NA	NA	NA	NA	NA	NA
2020/06/23 9:14:23 AM GMT+1	Dog	Large (20-40kg)	30	12	No	NA	NA	NA	NA	NA	NA	NA	NA	NA	NA	NA	No	No	NA	Yes	February;March	1	On the floor;Outdoors kennel/building	On the floor	Every 2 weeks	Every day	Every 6 months	Outdoors	Every week or more	2 hours	6 hours	An equal mixture of the above	Yes, I will walk my dog in light drizzle	9	Bag and bin (specific dog poo bin);Bag and bin (home council bin)	Bag and bin (specific dog poo bin)	No	NA	NA	NA	NA	NA	NA	NA	NA	NA	NA	NA	NA
2020/06/23 9:20:08 AM GMT+1	Dog	Small (4-10kg)	11	9	Yes	To prevent fleas (or other pests)	No	NA	Advocate	Advocate	12	From a veterinary practice	NA	NA	NA	No	No	No	NA	No	NA	4	In their own bed;On the floor;In a crate	In a crate	Every month	Every day	Every month	At the groomers	Once a year	1 hour	3 hours	Mainly on unpaved surfaces like field margins, forest tracks or the beach	Yes, I walk my dog even if it is raining heavily and my dog gets completely wet	10	Bag and bin (specific dog poo bin);Bag and bin (home council bin)	Bag and bin (home council bin)	No	NA	NA	NA	NA	NA	NA	NA	NA	NA	NA	NA	NA
2020/06/23 9:27:12 AM GMT+1	Cat	NA	NA	NA	NA	NA	NA	NA	NA	NA	NA	NA	NA	NA	NA	NA	NA	NA	NA	NA	NA	NA	NA	NA	NA	NA	NA	NA	NA	NA	NA	NA	NA	NA	NA	NA	NA	Large (above 4 kg)	4.5	13	Yes	To prevent fleas (or other pests)	No	NA	Advocate	Advocate	12	From a veterinary practice	Yes
2020/06/23 9:34:53 AM GMT+1	Dog	Small (4-10kg)	8	9	No	NA	NA	NA	NA	NA	NA	NA	NA	NA	NA	NA	No	No	NA	No	NA	None	In their own bed	In their own bed	Every 2 weeks	Every day	Less than once a year	In a bath, sink or shower	Never	1 hour	2 hours	Mainly on unpaved surfaces like field margins, forest tracks or the beach	Occasionally, but I try to avoid this	5	Bag and bin (home council bin)	Bag and bin (home council bin)	No	NA	NA	NA	NA	NA	NA	NA	NA	NA	NA	NA	NA
2020/06/23 9:35:13 AM GMT+1	Dog	Small (4-10kg)	6.5	1	Yes	To prevent fleas (or other pests)	No	NA	Advocate;Flea collar	Advocate	12	From a veterinary practice	No	Yes	Yes	No	No	No	NA	No	NA	2	In their own bed;In a crate	In a crate	Every 2 weeks	Every day	Every month	In a bath, sink or shower	Every month	2 hours	6 hours	Mainly on unpaved surfaces like field margins, forest tracks or the beach	Yes, I will walk my dog in light drizzle	10	Bag and bin (specific dog poo bin);Bag and bin (home council bin);Straight in a bin (of any kind)	Straight in a bin (of any kind)	No	NA	NA	NA	NA	NA	NA	NA	NA	NA	NA	NA	NA
2020/06/23 9:36:35 AM GMT+1	Cat	NA	NA	NA	NA	NA	NA	NA	NA	NA	NA	NA	NA	NA	NA	NA	NA	NA	NA	NA	NA	NA	NA	NA	NA	NA	NA	NA	NA	NA	NA	NA	NA	NA	NA	NA	NA	Large (above 4 kg)	4	7	Yes	To prevent fleas (or other pests)	Don't know	NA	It?ÇÖs a Bob Martin flea collar	Bob Martin flea collar	2	From a supermarket	No
2020/06/23 9:40:11 AM GMT+1	Dog	Medium (10-20 kg)	18	6	Yes	To prevent fleas (or other pests)	No	NA	Bravecto tablet	Bravecto tablet	4	Online	NA	NA	NA	No	No	No	NA	Yes	May	4	In their own bed;On the furniture;On a family member's bed;On the floor	In their own bed	Never	Every day	Every month	In a bath, sink or shower	Every month	1 hour	3 hours	An equal mixture of the above	Yes, I will walk my dog in light drizzle	10	Bag and bin (specific dog poo bin);Bag and bin (home council bin)	Bag and bin (home council bin)	No	NA	NA	NA	NA	NA	NA	NA	NA	NA	NA	NA	NA
2020/06/23 9:40:59 AM GMT+1	Dog	Medium (10-20 kg)	14	4	Yes	To prevent fleas (or other pests)	Yes	Billy no mates	Advocate	Advocate	2	From a veterinary practice	Yes	Yes	Yes	No	Yes	Yes	April;May	Yes	May;June;July;August	1	In their own bed;On the furniture;On a family member's bed;On the floor	In their own bed	Every month	Every day	Every month	At the groomers	Every 2 weeks	2 hours	3 hours	Mainly on unpaved surfaces like field margins, forest tracks or the beach	Yes, I will walk my dog in light drizzle	10	Bag and bin (specific dog poo bin)	Bag and bin (specific dog poo bin)	No	NA	NA	NA	NA	NA	NA	NA	NA	NA	NA	NA	NA
2020/06/23 9:43:44 AM GMT+1	Dog	Large (20-40kg)	25	9	Yes	To prevent fleas (or other pests)	No	NA	Bravecto tablet	Bravecto tablet	4	From a veterinary practice	NA	NA	NA	No	No	No	NA	No	NA	4	In their own bed;On a family member's bed	In their own bed	Every month	Every day	Every month	In a bath, sink or shower	Once a year	1 hour	2 hours	Mainly on paved surfaces	Occasionally, but I try to avoid this	10	Bag and bin (specific dog poo bin);Bag and bin (home council bin)	Bag and bin (home council bin)	No	NA	NA	NA	NA	NA	NA	NA	NA	NA	NA	NA	NA
2020/06/23 9:46:00 AM GMT+1	Cat	NA	NA	NA	NA	NA	NA	NA	NA	NA	NA	NA	NA	NA	NA	NA	NA	NA	NA	NA	NA	NA	NA	NA	NA	NA	NA	NA	NA	NA	NA	NA	NA	NA	NA	NA	NA	Large (above 4 kg)	5.2	9	Yes	To prevent fleas (or other pests)	No	NA	Advantage	Advantage	8	Online	Yes
2020/06/23 9:51:24 AM GMT+1	Dog	Small (4-10kg)	8	8	Yes	To prevent fleas (or other pests)	Yes	Healthy Dog Co All Natural Flea Fighter for Dogs & Cats	Seresto collar	Seresto collar	1	Online	NA	Yes	Yes	No	No	No	NA	No	NA	None	In their own bed;On the furniture;On the floor	In their own bed	Every month	Every day	Every 3 months	At the groomers	Never	2 hours	3 hours	Mainly on paved surfaces	Yes, I will walk my dog in light drizzle	10	Bag and bin (home council bin)	Bag and bin (home council bin)	No	NA	NA	NA	NA	NA	NA	NA	NA	NA	NA	NA	NA
2020/06/23 9:57:01 AM GMT+1	Dog	Small (4-10kg)	10	1	Yes	To prevent fleas (or other pests)	No	NA	NexGard Spectra	NexGard Spectra	12	From a veterinary practice	NA	NA	NA	No	Yes	Yes	May	No	NA	12	In a crate	In a crate	Every 2 weeks	Every day	Every month	At the groomers	Every 6 months	1 hour	1 hour	An equal mixture of the above	Occasionally, but I try to avoid this	10	Bag and bin (specific dog poo bin)	Bag and bin (specific dog poo bin)	No	NA	NA	NA	NA	NA	NA	NA	NA	NA	NA	NA	NA
2020/06/23 9:59:29 AM GMT+1	Cat	NA	NA	NA	NA	NA	NA	NA	NA	NA	NA	NA	NA	NA	NA	NA	NA	NA	NA	NA	NA	NA	NA	NA	NA	NA	NA	NA	NA	NA	NA	NA	NA	NA	NA	NA	NA	Large (above 4 kg)	5.5	8	Yes	To prevent fleas (or other pests)	Don't know	NA	Broadline	Broadline	12	From a veterinary practice	Yes
2020/06/23 10:00:31 AM GMT+1	Cat	NA	NA	NA	NA	NA	NA	NA	NA	NA	NA	NA	NA	NA	NA	NA	NA	NA	NA	NA	NA	NA	NA	NA	NA	NA	NA	NA	NA	NA	NA	NA	NA	NA	NA	NA	NA	Large (above 4 kg)	4.5	13	Yes	To prevent fleas (or other pests)	No	NA	Frontline or Frontline Combo	Frontline or Frontline Combo	12	Online	Yes
2020/06/23 10:01:40 AM GMT+1	Cat	NA	NA	NA	NA	NA	NA	NA	NA	NA	NA	NA	NA	NA	NA	NA	NA	NA	NA	NA	NA	NA	NA	NA	NA	NA	NA	NA	NA	NA	NA	NA	NA	NA	NA	NA	NA	Small (below 4kg)	3.4	3	Yes	To prevent fleas (or other pests)	No	NA	Advocate	Advocate	12	From a veterinary practice	No
2020/06/23 10:11:06 AM GMT+1	Dog	Medium (10-20 kg)	12	14	Yes	To prevent fleas (or other pests)	No	NA	Bravecto tablet	Bravecto tablet	4	From a veterinary practice	Don't know	NA	NA	No	No	No	NA	No	NA	4	In their own bed;On the furniture;On the floor	In their own bed	Every 2 weeks	Every day	Every 3 months	In a bath, sink or shower	Never	30 minutes	2 hours	An equal mixture of the above	Occasionally, but I try to avoid this	9	Bag and bin (specific dog poo bin);Bag and bin (home council bin)	Bag and bin (specific dog poo bin)	No	NA	NA	NA	NA	NA	NA	NA	NA	NA	NA	NA	NA
2020/06/23 10:18:50 AM GMT+1	Dog	Small (4-10kg)	7.5	5	Yes	To prevent fleas (or other pests)	Don't know	NA	NexGard Spectra;Prinovox;Seresto collar	NexGard Spectra	12	From a veterinary practice	No	Yes	Yes	No	No	No	NA	No	NA	4	In their own bed;On the furniture;On a family member's bed;On the floor	In their own bed	Every 2 weeks	Every day	Every 2 weeks	In a bath, sink or shower	Once a year	30 minutes	3 hours	An equal mixture of the above	Yes, I will walk my dog in light drizzle	10	Bag and bin (specific dog poo bin);Bag and bin (home council bin)	Bag and bin (home council bin)	No	NA	NA	NA	NA	NA	NA	NA	NA	NA	NA	NA	NA
2020/06/23 10:19:36 AM GMT+1	Dog	Medium (10-20 kg)	20	4	Yes	To prevent fleas (or other pests)	No	NA	Bravecto tablet	Bravecto tablet	4	From a veterinary practice	NA	NA	NA	No	No	No	NA	Yes	June;July;August;September	4	In their own bed	In their own bed	Once a year	Every day	Less than once a year	NA	Never	1 hour	3 hours	Mainly on unpaved surfaces like field margins, forest tracks or the beach	Yes, I walk my dog even if it is raining heavily and my dog gets completely wet	10	Bag and bin (specific dog poo bin);Bag and bin (home council bin)	Bag and bin (home council bin)	No	NA	NA	NA	NA	NA	NA	NA	NA	NA	NA	NA	NA
2020/06/23 10:20:33 AM GMT+1	Cat	NA	NA	NA	NA	NA	NA	NA	NA	NA	NA	NA	NA	NA	NA	NA	NA	NA	NA	NA	NA	NA	NA	NA	NA	NA	NA	NA	NA	NA	NA	NA	NA	NA	NA	NA	NA	Small (below 4kg)	NA	5	Yes	In response to a flea infestation	No	NA	Advantage	Advantage	2	Online	Yes
2020/06/23 10:29:25 AM GMT+1	Cat	NA	NA	NA	NA	NA	NA	NA	NA	NA	NA	NA	NA	NA	NA	NA	NA	NA	NA	NA	NA	NA	NA	NA	NA	NA	NA	NA	NA	NA	NA	NA	NA	NA	NA	NA	NA	Small (below 4kg)	4	14	Yes	To prevent fleas (or other pests)	No	NA	Advocate	Advocate	12	From a veterinary practice	Yes
2020/06/23 10:30:25 AM GMT+1	Dog	Large (20-40kg)	36	8	Yes	To prevent fleas (or other pests)	No	NA	Advocate	Advocate	8	From a veterinary practice	Yes	Yes	NA	No	No	No	NA	No	NA	8	In their own bed	In their own bed	Every month	Every 2 days	Once a year	Outdoors	Never	1 hour	2 hours	An equal mixture of the above	Occasionally, but I try to avoid this	10	Bag and bin (specific dog poo bin)	Bag and bin (specific dog poo bin)	No	NA	NA	NA	NA	NA	NA	NA	NA	NA	NA	NA	NA
2020/06/23 10:45:13 AM GMT+1	Dog	Medium (10-20 kg)	18	6	Yes	In response to other pests (eg ticks)	No	NA	NexGard	NexGard	8	From a veterinary practice	NA	NA	NA	No	No	No	NA	Yes	May;June;July;August;September	3	In their own bed;On the furniture	In their own bed	Every month	Every day	Every week or more	Outdoors	Every week or more	1 hour	2 hours	Mainly on unpaved surfaces like field margins, forest tracks or the beach	Yes, I walk my dog even if it is raining heavily and my dog gets completely wet	8	Bag and bin (specific dog poo bin);Bag and bin (home council bin);Straight in a bin (of any kind)	Bag and bin (home council bin)	No	NA	NA	NA	NA	NA	NA	NA	NA	NA	NA	NA	NA
2020/06/23 10:49:52 AM GMT+1	Dog	Large (20-40kg)	30	4	Yes	To prevent fleas (or other pests)	No	NA	Advocate;Bravecto tablet	Advocate	12	From a veterinary practice	No	Yes	Yes	No	No	Yes	June	No	NA	12	In their own bed;On a family member's bed;On the floor	On the floor	Every 2 weeks	Every day	Every week or more	Outdoors	Less than once a year	1 hour	3 hours	An equal mixture of the above	Yes, I walk my dog even if it is raining heavily and my dog gets completely wet	10	Bag and bin (specific dog poo bin)	Bag and bin (specific dog poo bin)	No	NA	NA	NA	NA	NA	NA	NA	NA	NA	NA	NA	NA
2020/06/23 10:51:09 AM GMT+1	Dog	Large (20-40kg)	35	4	Yes	To prevent fleas (or other pests)	No	NA	Bravecto tablet	Bravecto tablet	4	From a veterinary practice	NA	NA	NA	No	No	No	NA	Yes	April;May;June;July;August;September;October	12	In their own bed	In their own bed	Every 2 weeks	Every week	Every 6 months	Outdoors	Every week or more	2 hours	6 hours	Mainly on unpaved surfaces like field margins, forest tracks or the beach	Yes, I walk my dog even if it is raining heavily and my dog gets completely wet	10	Bag and bin (specific dog poo bin);Bag and bin (home council bin)	Bag and bin (specific dog poo bin)	No	NA	NA	NA	NA	NA	NA	NA	NA	NA	NA	NA	NA
2020/06/23 10:52:34 AM GMT+1	Dog	Small (4-10kg)	8	5	Yes	To prevent fleas (or other pests)	No	NA	NexGard Spectra	NexGard Spectra	12	From a veterinary practice	NA	NA	NA	No	No	No	NA	No	NA	12	In their own bed	In their own bed	Every 2 weeks	Every day	Every month	In a bath, sink or shower	Every 2 weeks	1 hour	2 hours	Mainly on unpaved surfaces like field margins, forest tracks or the beach	Yes, I will walk my dog in light drizzle	10	Bag and bin (specific dog poo bin)	Bag and bin (specific dog poo bin)	No	NA	NA	NA	NA	NA	NA	NA	NA	NA	NA	NA	NA
2020/06/23 11:01:30 AM GMT+1	Cat	NA	NA	NA	NA	NA	NA	NA	NA	NA	NA	NA	NA	NA	NA	NA	NA	NA	NA	NA	NA	NA	NA	NA	NA	NA	NA	NA	NA	NA	NA	NA	NA	NA	NA	NA	NA	Large (above 4 kg)	5.3	11	Yes	To prevent fleas (or other pests)	No	NA	Comfortis	Comfortis	4	From a veterinary practice	NA
2020/06/23 11:03:18 AM GMT+1	Cat	NA	NA	NA	NA	NA	NA	NA	NA	NA	NA	NA	NA	NA	NA	NA	NA	NA	NA	NA	NA	NA	NA	NA	NA	NA	NA	NA	NA	NA	NA	NA	NA	NA	NA	NA	NA	Large (above 4 kg)	6	11	Yes	In response to a flea infestation	No	NA	Bravecto;Stronghold	Stronghold	3	From a veterinary practice	No
2020/06/23 11:17:07 AM GMT+1	Dog	Large (20-40kg)	29	7	Yes	To prevent fleas (or other pests)	No	NA	Advocate	Advocate	12	From a veterinary practice	No	Yes	NA	No	No	No	NA	No	NA	4	In their own bed	On the floor	Every month	Every day	Don't know	Outdoors	Never	2 hours	3 hours	An equal mixture of the above	Yes, I walk my dog even if it is raining heavily and my dog gets completely wet	9	Bag and bin (home council bin)	Bag and bin (home council bin)	No	NA	NA	NA	NA	NA	NA	NA	NA	NA	NA	NA	NA
2020/06/23 11:19:19 AM GMT+1	Cat	NA	NA	NA	NA	NA	NA	NA	NA	NA	NA	NA	NA	NA	NA	NA	NA	NA	NA	NA	NA	NA	NA	NA	NA	NA	NA	NA	NA	NA	NA	NA	NA	NA	NA	NA	NA	Large (above 4 kg)	13	8	Yes	To prevent fleas (or other pests)	No	NA	Advocate	Advocate	2	From a veterinary practice	No
2020/06/23 11:20:32 AM GMT+1	Cat	NA	NA	NA	NA	NA	NA	NA	NA	NA	NA	NA	NA	NA	NA	NA	NA	NA	NA	NA	NA	NA	NA	NA	NA	NA	NA	NA	NA	NA	NA	NA	NA	NA	NA	NA	NA	Large (above 4 kg)	4	15	Yes	To prevent fleas (or other pests)	No	NA	Bravecto	Bravecto	3	From a veterinary practice	Yes
2020/06/23 11:29:54 AM GMT+1	Dog	Small (4-10kg)	8	7	Yes	To prevent fleas (or other pests)	No	NA	Advocate	Advocate	12	From a veterinary practice	Yes	Yes	Yes	Maybe	No	No	NA	No	NA	3	In their own bed	In their own bed	Every 6 months	Every day	Every 3 months	At the groomers	Never	30 minutes	2 hours	Mainly on paved surfaces	Yes, I will walk my dog in light drizzle	10	Bag and bin (specific dog poo bin);Bag and bin (home council bin)	Bag and bin (home council bin)	No	NA	NA	NA	NA	NA	NA	NA	NA	NA	NA	NA	NA
2020/06/23 11:36:00 AM GMT+1	Cat	NA	NA	NA	NA	NA	NA	NA	NA	NA	NA	NA	NA	NA	NA	NA	NA	NA	NA	NA	NA	NA	NA	NA	NA	NA	NA	NA	NA	NA	NA	NA	NA	NA	NA	NA	NA	Large (above 4 kg)	NA	9	No	NA	NA	NA	NA	NA	NA	NA	NA
2020/06/23 11:38:32 AM GMT+1	Dog	Large (20-40kg)	28	11	Yes	To prevent fleas (or other pests)	No	NA	Bravecto tablet;Seresto collar	Bravecto tablet	3	From a veterinary practice	NA	Yes	Yes	No	No	No	NA	Yes	March	3	On the furniture;On a family member's bed;On the floor	On a family member's bed	Every week or more	Every day	Every 6 months	Outdoors	Every 3 months	2 hours	6 hours	Mainly on unpaved surfaces like field margins, forest tracks or the beach	Yes, I will walk my dog in light drizzle	4	Bag and bin (home council bin)	Bag and bin (home council bin)	No	NA	NA	NA	NA	NA	NA	NA	NA	NA	NA	NA	NA
2020/06/23 11:43:12 AM GMT+1	Dog	Small (4-10kg)	6	7	Yes	To prevent fleas (or other pests)	No	NA	Bravecto tablet	Bravecto tablet	3	From a petshop	NA	NA	NA	No	No	No	NA	No	NA	2	In their own bed	In their own bed	Every week or more	Every day	Every 3 months	At the groomers	Never	1 hour	3 hours	Mainly on unpaved surfaces like field margins, forest tracks or the beach	Yes, I walk my dog even if it is raining heavily and my dog gets completely wet	10	Bag and bin (specific dog poo bin)	Bag and bin (specific dog poo bin)	No	NA	NA	NA	NA	NA	NA	NA	NA	NA	NA	NA	NA
2020/06/23 11:51:10 AM GMT+1	Cat	NA	NA	NA	NA	NA	NA	NA	NA	NA	NA	NA	NA	NA	NA	NA	NA	NA	NA	NA	NA	NA	NA	NA	NA	NA	NA	NA	NA	NA	NA	NA	NA	NA	NA	NA	NA	Large (above 4 kg)	NA	10	Yes	In response to a flea infestation	No	NA	Bob Martin Clear / Clear Plus (Fipronil);Imidacloprid/ Imidaflea/ Imidaspot	Bob Martin Clear / Clear Plus (Fipronil)	3	From a supermarket	Don't know
2020/06/23 11:52:33 AM GMT+1	Cat	NA	NA	NA	NA	NA	NA	NA	NA	NA	NA	NA	NA	NA	NA	NA	NA	NA	NA	NA	NA	NA	NA	NA	NA	NA	NA	NA	NA	NA	NA	NA	NA	NA	NA	NA	NA	Small (below 4kg)	3.2	15	Yes	To prevent fleas (or other pests)	No	NA	Vectra	Vectra	2	From a veterinary practice	Yes
2020/06/23 11:52:50 AM GMT+1	Dog	Medium (10-20 kg)	NA	7	No	NA	NA	NA	NA	NA	NA	NA	NA	NA	NA	NA	No	No	NA	No	NA	None	In their own bed	In their own bed	Every 6 months	Every week	Every 6 months	Outdoors	Every week or more	30 minutes	6 hours	Mainly on unpaved surfaces like field margins, forest tracks or the beach	Yes, I will walk my dog in light drizzle	0	None of the above/don't know	None of the above/don't know	No	NA	NA	NA	NA	NA	NA	NA	NA	NA	NA	NA	NA
2020/06/23 11:57:04 AM GMT+1	Dog	Large (20-40kg)	34	1	Yes	To prevent fleas (or other pests)	No	NA	Advocate;Bravecto tablet;Seresto collar	Bravecto tablet	3	From a veterinary practice	Don't know	Yes	No	No	No	No	NA	No	NA	2	In their own bed;In a crate	In a crate	Every month	Every day	Once a year	At the groomers	Every week or more	30 minutes	3 hours	Mainly on unpaved surfaces like field margins, forest tracks or the beach	Yes, I will walk my dog in light drizzle	10	Bag and bin (specific dog poo bin);Bag and bin (home council bin);Straight in a bin (of any kind)	Bag and bin (specific dog poo bin)	No	NA	NA	NA	NA	NA	NA	NA	NA	NA	NA	NA	NA
2020/06/23 12:11:55 PM GMT+1	Dog	Medium (10-20 kg)	17	10	Yes	To prevent fleas (or other pests)	No	NA	Frontline or Frontline Combo spot on	Frontline or Frontline Combo spot on	1	Online	Yes	No	NA	No	No	No	NA	No	NA	1	In their own bed;On the floor	In their own bed	Every 3 months	Every day	Every 6 months	In a bath, sink or shower	Never	1 hour	2 hours	An equal mixture of the above	Yes, I walk my dog even if it is raining heavily and my dog gets completely wet	10	Bag and bin (specific dog poo bin);Straight in a bin (of any kind)	Bag and bin (home council bin)	Yes	NA	NA	NA	NA	NA	NA	NA	NA	NA	NA	NA	NA
2020/06/23 12:13:45 PM GMT+1	Dog	Small (4-10kg)	9.2	1	Yes	To prevent fleas (or other pests)	No	NA	Advocate	Advocate	12	From a veterinary practice	Yes	Yes	Yes	No	No	No	NA	No	NA	4	On a family member's bed	On a family member's bed	Every week or more	Every day	Every month	In a bath, sink or shower	Never	1 hour	2 hours	An equal mixture of the above	Occasionally, but I try to avoid this	10	Bag and bin (specific dog poo bin);Bag and bin (home council bin)	Bag and bin (specific dog poo bin)	No	NA	NA	NA	NA	NA	NA	NA	NA	NA	NA	NA	NA
2020/06/23 12:17:29 PM GMT+1	Cat	NA	NA	NA	NA	NA	NA	NA	NA	NA	NA	NA	NA	NA	NA	NA	NA	NA	NA	NA	NA	NA	NA	NA	NA	NA	NA	NA	NA	NA	NA	NA	NA	NA	NA	NA	NA	Small (below 4kg)	3	3	Yes	To prevent fleas (or other pests)	No	NA	Frontline or Frontline Combo	Frontline or Frontline Combo	4	Online	Yes
2020/06/23 12:22:43 PM GMT+1	Cat	NA	NA	NA	NA	NA	NA	NA	NA	NA	NA	NA	NA	NA	NA	NA	NA	NA	NA	NA	NA	NA	NA	NA	NA	NA	NA	NA	NA	NA	NA	NA	NA	NA	NA	NA	NA	Large (above 4 kg)	4.5	8	No	NA	NA	NA	NA	NA	NA	NA	NA
2020/06/23 12:26:05 PM GMT+1	Dog	Large (20-40kg)	30	13	No	NA	NA	NA	NA	NA	NA	NA	NA	NA	NA	NA	No	No	NA	No	NA	None	On the floor	On the floor	Every 6 months	Every day	Every month	Outdoors	Every month	30 minutes	3 hours	An equal mixture of the above	Yes, I will walk my dog in light drizzle	10	Bag and bin (specific dog poo bin);Bag and bin (home council bin)	Bag and bin (home council bin)	No	NA	NA	NA	NA	NA	NA	NA	NA	NA	NA	NA	NA
2020/06/23 12:28:04 PM GMT+1	Cat	NA	NA	NA	NA	NA	NA	NA	NA	NA	NA	NA	NA	NA	NA	NA	NA	NA	NA	NA	NA	NA	NA	NA	NA	NA	NA	NA	NA	NA	NA	NA	NA	NA	NA	NA	NA	Small (below 4kg)	2.9	15	Yes	To prevent fleas (or other pests)	No	NA	Frontline or Frontline Combo	Frontline or Frontline Combo	8	From a veterinary practice	Yes
2020/06/23 12:28:52 PM GMT+1	Cat	NA	NA	NA	NA	NA	NA	NA	NA	NA	NA	NA	NA	NA	NA	NA	NA	NA	NA	NA	NA	NA	NA	NA	NA	NA	NA	NA	NA	NA	NA	NA	NA	NA	NA	NA	NA	Small (below 4kg)	2.3	12	Yes	To prevent fleas (or other pests)	No	NA	Program injection	Program injection	2	From a veterinary practice	NA
2020/06/23 12:45:18 PM GMT+1	Dog	Large (20-40kg)	37	6	Yes	To prevent fleas (or other pests)	No	NA	Stronghold	Stronghold	12	From a veterinary practice	No	Yes	Yes	No	No	No	NA	No	NA	4	In their own bed;On the furniture;On a family member's bed;On the floor	In their own bed	Every month	Every day	Every month	In a bath, sink or shower	Don't know	30 minutes	1 hour	Mainly on unpaved surfaces like field margins, forest tracks or the beach	Yes, I walk my dog even if it is raining heavily and my dog gets completely wet	10	Bag and bin (specific dog poo bin)	Bag and bin (specific dog poo bin)	Yes	NA	NA	NA	NA	NA	NA	NA	NA	NA	NA	NA	NA
2020/06/23 1:00:24 PM GMT+1	Cat	NA	NA	NA	NA	NA	NA	NA	NA	NA	NA	NA	NA	NA	NA	NA	NA	NA	NA	NA	NA	NA	NA	NA	NA	NA	NA	NA	NA	NA	NA	NA	NA	NA	NA	NA	NA	Large (above 4 kg)	4.2	2	Yes	To prevent fleas (or other pests)	No	NA	Frontline or Frontline Combo	Frontline or Frontline Combo	4	From a veterinary practice	No
2020/06/23 1:22:09 PM GMT+1	Dog	Large (20-40kg)	30	12	Yes	To prevent fleas (or other pests)	No	NA	Frontline or Frontline Combo spot on	Frontline or Frontline Combo spot on	6	Online	Yes	Yes	Yes	No	No	No	NA	No	NA	1	In their own bed;On the furniture;On the floor	In their own bed	Every week or more	Every day	Every 6 months	In a bath, sink or shower	Every 3 months	1 hour	3 hours	Mainly on unpaved surfaces like field margins, forest tracks or the beach	Yes, I walk my dog even if it is raining heavily and my dog gets completely wet	10	Bag and bin (specific dog poo bin)	Bag and bin (specific dog poo bin)	No	NA	NA	NA	NA	NA	NA	NA	NA	NA	NA	NA	NA
2020/06/23 1:25:38 PM GMT+1	Cat	NA	NA	NA	NA	NA	NA	NA	NA	NA	NA	NA	NA	NA	NA	NA	NA	NA	NA	NA	NA	NA	NA	NA	NA	NA	NA	NA	NA	NA	NA	NA	NA	NA	NA	NA	NA	Large (above 4 kg)	4.5	12	Yes	To prevent fleas (or other pests)	No	NA	Stronghold	Stronghold	12	From a veterinary practice	Yes
2020/06/23 1:34:44 PM GMT+1	Dog	Medium (10-20 kg)	18	2	Yes	To prevent fleas (or other pests)	No	NA	Bravecto tablet;Bravecto spot on	Bravecto spot on	4	From a veterinary practice	Yes	No	NA	Yes	No	Yes	NA	No	NA	4	On a family member's bed	On a family member's bed	Every 2 weeks	Every day	Every week or more	Outdoors	Less than once a year	2 hours	3 hours	Mainly on unpaved surfaces like field margins, forest tracks or the beach	Yes, I walk my dog even if it is raining heavily and my dog gets completely wet	10	Bag and bin (specific dog poo bin)	Bag and bin (specific dog poo bin)	No	NA	NA	NA	NA	NA	NA	NA	NA	NA	NA	NA	NA
2020/06/23 1:36:16 PM GMT+1	Dog	Small (4-10kg)	NA	8	Yes	To prevent fleas (or other pests)	No	NA	Bravecto tablet	Bravecto tablet	3	From a veterinary practice	NA	NA	NA	No	Yes	No	NA	No	NA	None	In their own bed;On the furniture;On a family member's bed;On the floor	On a family member's bed	Once a year	Every day	Less than once a year	In a bath, sink or shower	Every 2 weeks	1 hour	3 hours	An equal mixture of the above	Yes, I will walk my dog in light drizzle	10	Bag and bin (specific dog poo bin);Bag and bin (home council bin);Straight in a bin (of any kind)	Straight in a bin (of any kind)	No	NA	NA	NA	NA	NA	NA	NA	NA	NA	NA	NA	NA
2020/06/23 1:38:38 PM GMT+1	Dog	Large (20-40kg)	40	11	Yes	To prevent fleas (or other pests)	Yes	Billy No Mates	Billy No Mates	Billy No Mates	12	Online	NA	NA	NA	No	No	No	NA	No	NA	2	In their own bed	In their own bed	Every month	Every day	Once a year	In a bath, sink or shower	Every week or more	30 minutes	2 hours	An equal mixture of the above	Yes, I walk my dog even if it is raining heavily and my dog gets completely wet	10	Bag and bin (specific dog poo bin)	Bag and bin (specific dog poo bin)	No	NA	NA	NA	NA	NA	NA	NA	NA	NA	NA	NA	NA
2020/06/23 1:40:45 PM GMT+1	Dog	Extra large (over 40 kg)	45	1	No	NA	NA	NA	NA	NA	NA	NA	NA	NA	NA	NA	No	No	NA	No	NA	None	On the floor	On the floor	Every month	Every day	Every 3 months	In a bath, sink or shower	Never	1 hour	6 hours	An equal mixture of the above	Yes, I walk my dog even if it is raining heavily and my dog gets completely wet	10	Bag and bin (specific dog poo bin);Bag and bin (home council bin)	Bag and bin (home council bin)	No	NA	NA	NA	NA	NA	NA	NA	NA	NA	NA	NA	NA
2020/06/23 1:40:55 PM GMT+1	Dog	Large (20-40kg)	32	1	Yes	To prevent fleas (or other pests)	Don't know	NA	Advocate	Advocate	12	From a veterinary practice	Yes	Yes	Yes	No	Yes	No	NA	No	NA	2	On a family member's bed	On the floor	Every 6 months	Every day	Every 3 months	NA	Once a year	10 minutes	3 hours	Mainly on unpaved surfaces like field margins, forest tracks or the beach	Occasionally, but I try to avoid this	9	Bag and bin (specific dog poo bin);Bag and bin (home council bin)	Bag and bin (home council bin)	No	NA	NA	NA	NA	NA	NA	NA	NA	NA	NA	NA	NA
2020/06/23 2:34:00 PM GMT+1	Cat	NA	NA	NA	NA	NA	NA	NA	NA	NA	NA	NA	NA	NA	NA	NA	NA	NA	NA	NA	NA	NA	NA	NA	NA	NA	NA	NA	NA	NA	NA	NA	NA	NA	NA	NA	NA	Large (above 4 kg)	6	10	Yes	To prevent fleas (or other pests)	No	NA	Program injection	Program injection	2	From a veterinary practice	NA
2020/06/23 2:34:10 PM GMT+1	Dog	Miniature (< 4 kg)	3	<1	Yes	To prevent fleas (or other pests)	No	NA	Don't know	Don't know	1	From a veterinary practice	Yes	NA	NA	No	No	No	NA	No	NA	1	On a family member's bed	On a family member's bed	Don't know	Every day	Don't know	In a bath, sink or shower	Never	30 minutes	30 minutes	Mainly on paved surfaces	Yes, I will walk my dog in light drizzle	10	Bag and bin (specific dog poo bin);Flush down the toilet	Flush down the toilet	No	NA	NA	NA	NA	NA	NA	NA	NA	NA	NA	NA	NA
2020/06/23 3:06:32 PM GMT+1	Dog	Medium (10-20 kg)	12	5	Yes	To prevent fleas (or other pests)	No	NA	Advocate	Advocate	6	From a veterinary practice	No	No	NA	No	No	No	NA	No	NA	2	On the floor	In their own bed	Every 6 months	Every day	Every month	In a bath, sink or shower	Every month	2 hours	2 hours	Mainly on unpaved surfaces like field margins, forest tracks or the beach	Yes, I walk my dog even if it is raining heavily and my dog gets completely wet	10	Bag and bin (specific dog poo bin)	Bag and bin (specific dog poo bin)	No	NA	NA	NA	NA	NA	NA	NA	NA	NA	NA	NA	NA
2020/06/23 3:20:55 PM GMT+1	Cat	NA	NA	NA	NA	NA	NA	NA	NA	NA	NA	NA	NA	NA	NA	NA	NA	NA	NA	NA	NA	NA	NA	NA	NA	NA	NA	NA	NA	NA	NA	NA	NA	NA	NA	NA	NA	Small (below 4kg)	NA	12	Yes	To prevent fleas (or other pests)	No	NA	Frontline or Frontline Combo	Frontline or Frontline Combo	3	From a veterinary practice	No
2020/06/23 3:30:04 PM GMT+1	Dog	Medium (10-20 kg)	17	8	Yes	To prevent fleas (or other pests)	No	NA	Seresto collar	Seresto collar	2	Online	NA	NA	NA	No	No	No	NA	No	NA	6	In their own bed;On the furniture;On a family member's bed	On the furniture	Every month	Every day	Every 2 weeks	In a bath, sink or shower	Never	1 hour	2 hours	An equal mixture of the above	Yes, I will walk my dog in light drizzle	10	Bag and bin (specific dog poo bin)	Bag and bin (specific dog poo bin)	No	NA	NA	NA	NA	NA	NA	NA	NA	NA	NA	NA	NA
2020/06/23 3:40:57 PM GMT+1	Cat	NA	NA	NA	NA	NA	NA	NA	NA	NA	NA	NA	NA	NA	NA	NA	NA	NA	NA	NA	NA	NA	NA	NA	NA	NA	NA	NA	NA	NA	NA	NA	NA	NA	NA	NA	NA	Large (above 4 kg)	4.5	9	Yes	To prevent fleas (or other pests)	No	NA	Advocate	Advocate	3	From a veterinary practice	No
2020/06/23 3:50:12 PM GMT+1	Cat	NA	NA	NA	NA	NA	NA	NA	NA	NA	NA	NA	NA	NA	NA	NA	NA	NA	NA	NA	NA	NA	NA	NA	NA	NA	NA	NA	NA	NA	NA	NA	NA	NA	NA	NA	NA	Small (below 4kg)	3	1	Yes	To prevent fleas (or other pests)	No	NA	Bob Martin Clear / Clear Plus (Fipronil);Frontline or Frontline Combo	Bob Martin Clear / Clear Plus (Fipronil)	3	From a petshop	Yes
2020/06/23 4:24:52 PM GMT+1	Dog	Medium (10-20 kg)	11	2	Yes	To prevent fleas (or other pests)	No	NA	Bravecto tablet	Bravecto tablet	4	Online	NA	NA	NA	No	No	No	NA	No	NA	12	In their own bed;On the furniture;On the floor;In a crate	On the furniture	Every 2 weeks	Every day	Every month	In a bath, sink or shower	Less than once a year	1 hour	2 hours	An equal mixture of the above	Yes, I will walk my dog in light drizzle	10	Bag and bin (specific dog poo bin);Bag and bin (home council bin)	Bag and bin (specific dog poo bin)	No	NA	NA	NA	NA	NA	NA	NA	NA	NA	NA	NA	NA
2020/06/23 4:29:58 PM GMT+1	Cat	NA	NA	NA	NA	NA	NA	NA	NA	NA	NA	NA	NA	NA	NA	NA	NA	NA	NA	NA	NA	NA	NA	NA	NA	NA	NA	NA	NA	NA	NA	NA	NA	NA	NA	NA	NA	Large (above 4 kg)	4.68	10	Yes	To prevent fleas (or other pests)	No	NA	Frontline or Frontline Combo	Frontline or Frontline Combo	8	From a veterinary practice	No
2020/06/23 4:33:51 PM GMT+1	Dog	Large (20-40kg)	35	6	Yes	To prevent fleas (or other pests)	No	NA	Seresto collar	Seresto collar	1	From a veterinary practice	Don't know	NA	NA	No	No	No	NA	No	NA	3	In their own bed;On the furniture;On the floor	In their own bed	Every 2 weeks	Every day	Once a year	In a bath, sink or shower	Every month	1 hour	1 hour	Mainly on unpaved surfaces like field margins, forest tracks or the beach	Yes, I walk my dog even if it is raining heavily and my dog gets completely wet	3	Bag and bin (specific dog poo bin);Bag and bin (home council bin)	Bag and bin (home council bin)	No	NA	NA	NA	NA	NA	NA	NA	NA	NA	NA	NA	NA
2020/06/23 4:37:58 PM GMT+1	Dog	Small (4-10kg)	7	10	Yes	To prevent fleas (or other pests)	Yes	NA	Frontline or Frontline Combo spot on	Frontline or Frontline Combo spot on	5	Online	Yes	No	NA	No	Yes	Yes	February;June	No	NA	6	In their own bed;On the furniture;On the floor	In their own bed	Every 3 months	Every day	Every month	In a bath, sink or shower	Never	30 minutes	2 hours	Mainly on unpaved surfaces like field margins, forest tracks or the beach	Yes, I walk my dog even if it is raining heavily and my dog gets completely wet	9	Bag and bin (specific dog poo bin);Bag and bin (home council bin);Straight in a bin (of any kind)	Bag and bin (home council bin)	No	NA	NA	NA	NA	NA	NA	NA	NA	NA	NA	NA	NA
2020/06/23 4:38:12 PM GMT+1	Dog	Large (20-40kg)	39	6	No	NA	NA	NA	NA	NA	NA	NA	NA	NA	NA	NA	No	No	NA	No	NA	1	On the furniture	On the furniture	Every 2 weeks	Every day	Less than once a year	Outdoors	Never	1 hour	3 hours	Mainly on unpaved surfaces like field margins, forest tracks or the beach	Yes, I walk my dog even if it is raining heavily and my dog gets completely wet	10	Bag and bin (specific dog poo bin);Bag and bin (home council bin)	Bag and bin (specific dog poo bin)	No	NA	NA	NA	NA	NA	NA	NA	NA	NA	NA	NA	NA
2020/06/23 4:41:16 PM GMT+1	Dog	Medium (10-20 kg)	14	2	Yes	To prevent fleas (or other pests)	No	NA	Easecto	Easecto	12	From a veterinary practice	Don't know	NA	NA	No	No	No	NA	Yes	June	12	In their own bed;On the furniture;On a family member's bed	On a family member's bed	Every 2 weeks	Every day	Every month	At the groomers	Never	1 hour	6 hours	An equal mixture of the above	Yes, I will walk my dog in light drizzle	10	Straight in a bin (of any kind)	Straight in a bin (of any kind)	No	NA	NA	NA	NA	NA	NA	NA	NA	NA	NA	NA	NA
2020/06/23 4:54:50 PM GMT+1	Cat	NA	NA	NA	NA	NA	NA	NA	NA	NA	NA	NA	NA	NA	NA	NA	NA	NA	NA	NA	NA	NA	NA	NA	NA	NA	NA	NA	NA	NA	NA	NA	NA	NA	NA	NA	NA	Small (below 4kg)	4	3	Yes	To prevent fleas (or other pests)	No	NA	Fipnil/Fipralone/Fiprene/ Fiprex/ Fiproclear/Fiprofile/Fipronil/Fiprotec/Fiproxole/Fleanil/Fleascreen/Flevox/Flick/Fyperix	Frontline generic	12	Online	Yes
2020/06/23 5:05:00 PM GMT+1	Cat	NA	NA	NA	NA	NA	NA	NA	NA	NA	NA	NA	NA	NA	NA	NA	NA	NA	NA	NA	NA	NA	NA	NA	NA	NA	NA	NA	NA	NA	NA	NA	NA	NA	NA	NA	NA	Large (above 4 kg)	NA	12	Yes	To prevent fleas (or other pests)	No	NA	Stronghold	Stronghold	9	From a veterinary practice	Yes
2020/06/23 5:06:20 PM GMT+1	Dog	Large (20-40kg)	15	<1	Yes	To prevent fleas (or other pests)	No	NA	Advocate	Advocate	1	From a veterinary practice	Yes	No	NA	No	No	No	NA	No	NA	1	In a crate	In a crate	Don't know	Every day	Don't know	Outdoors	Don't know	10 minutes	Don't know	An equal mixture of the above	Yes, I walk my dog even if it is raining heavily and my dog gets completely wet	10	Bag and bin (specific dog poo bin);Bag and bin (home council bin)	Bag and bin (home council bin)	No	NA	NA	NA	NA	NA	NA	NA	NA	NA	NA	NA	NA
2020/06/23 5:15:50 PM GMT+1	Cat	NA	NA	NA	NA	NA	NA	NA	NA	NA	NA	NA	NA	NA	NA	NA	NA	NA	NA	NA	NA	NA	NA	NA	NA	NA	NA	NA	NA	NA	NA	NA	NA	NA	NA	NA	NA	Large (above 4 kg)	6	13	Yes	To prevent fleas (or other pests)	No	NA	Bravecto	Bravecto	4	From a veterinary practice	Yes
2020/06/23 5:18:17 PM GMT+1	Dog	Large (20-40kg)	NA	6	Yes	To prevent fleas (or other pests)	No	NA	Advocate;Frontline or Frontline Combo spot on	Advocate	11	From a veterinary practice	Yes	Yes	Yes	No	Yes	Yes	May;June	No	NA	6	In their own bed;On the floor	On the floor	Every week or more	Every day	Every 2 weeks	In a bath, sink or shower	Every month	1 hour	2 hours	An equal mixture of the above	Yes, I walk my dog even if it is raining heavily and my dog gets completely wet	10	Bag and bin (specific dog poo bin)	Bag and bin (specific dog poo bin)	No	NA	NA	NA	NA	NA	NA	NA	NA	NA	NA	NA	NA
2020/06/23 5:24:30 PM GMT+1	Cat	NA	NA	NA	NA	NA	NA	NA	NA	NA	NA	NA	NA	NA	NA	NA	NA	NA	NA	NA	NA	NA	NA	NA	NA	NA	NA	NA	NA	NA	NA	NA	NA	NA	NA	NA	NA	Large (above 4 kg)	NA	3	Yes	To prevent fleas (or other pests)	No	NA	Frontline or Frontline Combo	Frontline or Frontline Combo	12	Online	No
2020/06/23 5:29:50 PM GMT+1	Cat	NA	NA	NA	NA	NA	NA	NA	NA	NA	NA	NA	NA	NA	NA	NA	NA	NA	NA	NA	NA	NA	NA	NA	NA	NA	NA	NA	NA	NA	NA	NA	NA	NA	NA	NA	NA	Large (above 4 kg)	6.8	11	Yes	To prevent fleas (or other pests)	No	NA	Broadline	Broadline	9	From a veterinary practice	No
2020/06/23 5:33:19 PM GMT+1	Cat	NA	NA	NA	NA	NA	NA	NA	NA	NA	NA	NA	NA	NA	NA	NA	NA	NA	NA	NA	NA	NA	NA	NA	NA	NA	NA	NA	NA	NA	NA	NA	NA	NA	NA	NA	NA	Large (above 4 kg)	4.5	13	Yes	To prevent fleas (or other pests)	No	NA	Seresto collar	Seresto collar	1	Online	NA
2020/06/23 6:08:06 PM GMT+1	Dog	Medium (10-20 kg)	10	<1	Yes	To prevent fleas (or other pests)	No	NA	Advocate	Advocate	2	From a veterinary practice	Yes	Yes	Yes	No	No	No	NA	No	NA	2	In their own bed;On the furniture;On the floor	On the floor	Every 2 weeks	Every day	Every month	In a bath, sink or shower	Never	1 hour	3 hours	An equal mixture of the above	Yes, I will walk my dog in light drizzle	10	Bag and bin (home council bin)	Bag and bin (home council bin)	No	NA	NA	NA	NA	NA	NA	NA	NA	NA	NA	NA	NA
2020/06/23 6:10:53 PM GMT+1	Dog	Small (4-10kg)	7	1	Yes	To prevent fleas (or other pests)	No	NA	Credelio	Credelio	12	From a veterinary practice	No	Yes	Yes	No	No	No	NA	No	NA	12	In their own bed;On the furniture;On the floor;In a crate	In a crate	Every 2 weeks	Every day	Every 2 weeks	In a bath, sink or shower	Never	1 hour	3 hours	Mainly on paved surfaces	Yes, I will walk my dog in light drizzle	10	Bag and bin (specific dog poo bin);Bag and bin (home council bin)	Bag and bin (specific dog poo bin)	No	NA	NA	NA	NA	NA	NA	NA	NA	NA	NA	NA	NA
2020/06/23 6:17:34 PM GMT+1	Dog	Large (20-40kg)	21	7	No	NA	NA	NA	NA	NA	NA	NA	NA	NA	NA	NA	No	No	NA	No	NA	None	In their own bed;On the furniture;On the floor	On the furniture	Every month	Every day	Once a year	In a bath, sink or shower	Every 3 months	2 hours	6 hours	An equal mixture of the above	Yes, I walk my dog even if it is raining heavily and my dog gets completely wet	10	Bag and bin (specific dog poo bin);Bag and bin (home council bin)	Bag and bin (specific dog poo bin)	No	NA	NA	NA	NA	NA	NA	NA	NA	NA	NA	NA	NA
2020/06/23 6:26:17 PM GMT+1	Dog	Extra large (over 40 kg)	63.3	2	Yes	To prevent fleas (or other pests)	No	NA	Simparica	Simparica	12	From a veterinary practice	NA	NA	NA	No	No	No	NA	No	NA	4	On a family member's bed	On a family member's bed	Every week or more	Every day	Every week or more	In a bath, sink or shower	Never	3 hours	6 hours	An equal mixture of the above	Yes, I will walk my dog in light drizzle	10	Bag and bin (home council bin)	Bag and bin (home council bin)	No	NA	NA	NA	NA	NA	NA	NA	NA	NA	NA	NA	NA
2020/06/23 6:33:08 PM GMT+1	Dog	Small (4-10kg)	7	4	No	NA	NA	NA	NA	NA	NA	NA	NA	NA	NA	NA	No	No	NA	Yes	July	1	In their own bed	In their own bed	Every week or more	Every day	Every month	In a bath, sink or shower	Never	30 minutes	2 hours	Mainly on unpaved surfaces like field margins, forest tracks or the beach	Yes, I will walk my dog in light drizzle	10	Bag and bin (specific dog poo bin);Bag and bin (home council bin)	Bag and bin (specific dog poo bin)	No	NA	NA	NA	NA	NA	NA	NA	NA	NA	NA	NA	NA
2020/06/23 7:05:53 PM GMT+1	Cat	NA	NA	NA	NA	NA	NA	NA	NA	NA	NA	NA	NA	NA	NA	NA	NA	NA	NA	NA	NA	NA	NA	NA	NA	NA	NA	NA	NA	NA	NA	NA	NA	NA	NA	NA	NA	Large (above 4 kg)	5	8	Yes	To prevent fleas (or other pests)	No	NA	Broadline;Comfortis	Broadline	12	From a veterinary practice	Yes
2020/06/23 7:13:12 PM GMT+1	Cat	NA	NA	NA	NA	NA	NA	NA	NA	NA	NA	NA	NA	NA	NA	NA	NA	NA	NA	NA	NA	NA	NA	NA	NA	NA	NA	NA	NA	NA	NA	NA	NA	NA	NA	NA	NA	Large (above 4 kg)	NA	10	Yes	In response to a flea infestation	No	NA	Fipro	Frontline generic	1	From a petshop	Yes
2020/06/23 7:16:07 PM GMT+1	Cat	NA	NA	NA	NA	NA	NA	NA	NA	NA	NA	NA	NA	NA	NA	NA	NA	NA	NA	NA	NA	NA	NA	NA	NA	NA	NA	NA	NA	NA	NA	NA	NA	NA	NA	NA	NA	Large (above 4 kg)	4	12	Yes	To prevent fleas (or other pests)	No	NA	Advantage;Stronghold	Advantage	6	Online	Yes
2020/06/23 7:18:39 PM GMT+1	Dog	Large (20-40kg)	NA	>20	No	NA	NA	NA	NA	NA	NA	NA	NA	NA	NA	NA	No	No	NA	No	NA	2	In their own bed;On the furniture;On the floor	On the furniture	Every 3 months	Every day	Every month	Outdoors	Once a year	3 hours	3 hours	Mainly on unpaved surfaces like field margins, forest tracks or the beach	Yes, I walk my dog even if it is raining heavily and my dog gets completely wet	9	Bag and bin (specific dog poo bin)	Bag and bin (specific dog poo bin)	No	NA	NA	NA	NA	NA	NA	NA	NA	NA	NA	NA	NA
2020/06/23 7:27:26 PM GMT+1	Dog	Large (20-40kg)	22	1	Yes	To prevent fleas (or other pests)	No	NA	Frontline or Frontline Combo spot on	Frontline or Frontline Combo spot on	7	From a petshop	Yes	Yes	Yes	Maybe	No	No	NA	No	NA	4	In their own bed	On the floor	Every month	Every day	Every month	In a bath, sink or shower	Every month	1 hour	3 hours	An equal mixture of the above	Yes, I walk my dog even if it is raining heavily and my dog gets completely wet	10	Bag and bin (specific dog poo bin);Bag and bin (home council bin)	Bag and bin (home council bin)	No	NA	NA	NA	NA	NA	NA	NA	NA	NA	NA	NA	NA
2020/06/23 7:28:22 PM GMT+1	Dog	Large (20-40kg)	23	2	No	NA	NA	NA	NA	NA	NA	NA	NA	NA	NA	NA	No	No	NA	No	NA	4	In their own bed;On the furniture;On the floor	On the furniture	Every 3 months	Every day	Every 3 months	In a bath, sink or shower	Every 2 weeks	2 hours	3 hours	Mainly on unpaved surfaces like field margins, forest tracks or the beach	Yes, I walk my dog even if it is raining heavily and my dog gets completely wet	10	Bag and bin (home council bin);Straight in a bin (of any kind)	Straight in a bin (of any kind)	No	NA	NA	NA	NA	NA	NA	NA	NA	NA	NA	NA	NA
2020/06/23 7:30:08 PM GMT+1	Dog	Medium (10-20 kg)	16	9	Yes	To prevent fleas (or other pests)	No	NA	Simparica	Simparica	6	From a veterinary practice	Yes	Yes	Yes	No	No	No	NA	Yes	May;June;July;August	4	In their own bed	In their own bed	Less than once a year	Every day	Every month	In a bath, sink or shower	Every 2 weeks	1 hour	1 hour	An equal mixture of the above	Yes, I walk my dog even if it is raining heavily and my dog gets completely wet	10	Bag and bin (specific dog poo bin);Bag and bin (home council bin)	Bag and bin (home council bin)	No	NA	NA	NA	NA	NA	NA	NA	NA	NA	NA	NA	NA
2020/06/23 7:33:49 PM GMT+1	Dog	Large (20-40kg)	26	14	No	NA	NA	NA	NA	NA	NA	NA	NA	NA	NA	NA	No	No	NA	No	NA	None	In their own bed	In their own bed	Every month	Every day	Never	NA	Never	30 minutes	3 hours	An equal mixture of the above	Yes, I walk my dog even if it is raining heavily and my dog gets completely wet	10	Straight in a bin (of any kind)	Straight in a bin (of any kind)	No	NA	NA	NA	NA	NA	NA	NA	NA	NA	NA	NA	NA
2020/06/23 7:34:11 PM GMT+1	Dog	Medium (10-20 kg)	19.5	6	Yes	In response to other pests (eg ticks)	No	NA	Bravecto tablet;Credelio;Simparica	Bravecto tablet	4	From a veterinary practice	No	NA	NA	No	No	No	NA	Yes	May	3	On the furniture;On a family member's bed;On the floor;In a crate	On a family member's bed	Every month	Every week	Every 6 months	In a bath, sink or shower	Every week or more	1 hour	3 hours	Mainly on unpaved surfaces like field margins, forest tracks or the beach	Yes, I walk my dog even if it is raining heavily and my dog gets completely wet	8	Bag and bin (home council bin)	Bag and bin (home council bin)	No	NA	NA	NA	NA	NA	NA	NA	NA	NA	NA	NA	NA
2020/06/23 7:44:58 PM GMT+1	Dog	Medium (10-20 kg)	18	2	Yes	To prevent fleas (or other pests)	No	NA	Bravecto tablet;Simparica	Bravecto tablet	4	From a veterinary practice	NA	NA	NA	No	No	No	NA	Yes	June	4	In their own bed;On the floor;In a crate	In a crate	Every month	Every day	Every month	In a bath, sink or shower	Once a year	30 minutes	30 minutes	Mainly on paved surfaces	Yes, I walk my dog even if it is raining heavily and my dog gets completely wet	10	Bag and bin (specific dog poo bin);Bag and bin (home council bin);Straight in a bin (of any kind)	Straight in a bin (of any kind)	No	NA	NA	NA	NA	NA	NA	NA	NA	NA	NA	NA	NA
2020/06/23 7:58:19 PM GMT+1	Cat	NA	NA	NA	NA	NA	NA	NA	NA	NA	NA	NA	NA	NA	NA	NA	NA	NA	NA	NA	NA	NA	NA	NA	NA	NA	NA	NA	NA	NA	NA	NA	NA	NA	NA	NA	NA	Small (below 4kg)	2.9	<1	Yes	In response to a flea infestation	No	NA	Bravecto	Bravecto	2	From a veterinary practice	Yes
2020/06/23 8:03:43 PM GMT+1	Dog	Large (20-40kg)	30	1	Yes	To prevent fleas (or other pests)	No	NA	Advocate;Bravecto tablet	Bravecto tablet	6	From a veterinary practice	Yes	Yes	Yes	No	No	No	NA	Yes	May;June	6	In their own bed;In a crate	In a crate	Every 3 months	Every day	Every month	Outdoors	Every 2 weeks	2 hours	3 hours	Mainly on unpaved surfaces like field margins, forest tracks or the beach	Yes, I walk my dog even if it is raining heavily and my dog gets completely wet	7	Bag and bin (specific dog poo bin);Bag and bin (home council bin)	Bag and bin (specific dog poo bin)	No	NA	NA	NA	NA	NA	NA	NA	NA	NA	NA	NA	NA
2020/06/23 8:11:13 PM GMT+1	Dog	Medium (10-20 kg)	17	9	Yes	In response to a flea infestation	No	NA	Seresto collar	Seresto collar	1	Online	Yes	Yes	No	No	Yes	Yes	October	No	NA	None	On a family member's bed	On a family member's bed	Every week or more	Every day	Every 3 months	At the groomers	Every week or more	1 hour	2 hours	Mainly on unpaved surfaces like field margins, forest tracks or the beach	Yes, I walk my dog even if it is raining heavily and my dog gets completely wet	3	Bag and bin (specific dog poo bin)	Bag and bin (specific dog poo bin)	No	NA	NA	NA	NA	NA	NA	NA	NA	NA	NA	NA	NA
2020/06/23 8:18:39 PM GMT+1	Cat	NA	NA	NA	NA	NA	NA	NA	NA	NA	NA	NA	NA	NA	NA	NA	NA	NA	NA	NA	NA	NA	NA	NA	NA	NA	NA	NA	NA	NA	NA	NA	NA	NA	NA	NA	NA	Small (below 4kg)	3	7	Yes	To prevent fleas (or other pests)	No	NA	Broadline;Stronghold	Broadline	4	From a veterinary practice	Yes
2020/06/23 8:59:33 PM GMT+1	Cat	NA	NA	NA	NA	NA	NA	NA	NA	NA	NA	NA	NA	NA	NA	NA	NA	NA	NA	NA	NA	NA	NA	NA	NA	NA	NA	NA	NA	NA	NA	NA	NA	NA	NA	NA	NA	Small (below 4kg)	NA	5	Yes	In response to a flea infestation	No	NA	Stronghold	Stronghold	3	From a petshop	Don't know
2020/06/23 9:05:16 PM GMT+1	Dog	Large (20-40kg)	29	11	No	NA	NA	NA	NA	NA	NA	NA	NA	NA	NA	NA	No	No	NA	Yes	April;May;June;July;August;September;October	2	In their own bed	In their own bed	Every month	Every day	Every 2 weeks	In a bath, sink or shower	Once a year	2 hours	3 hours	Mainly on unpaved surfaces like field margins, forest tracks or the beach	Yes, I walk my dog even if it is raining heavily and my dog gets completely wet	5	Bag and bin (specific dog poo bin)	Bag and bin (specific dog poo bin)	Yes	NA	NA	NA	NA	NA	NA	NA	NA	NA	NA	NA	NA
2020/06/23 9:11:04 PM GMT+1	Dog	Small (4-10kg)	7	12	Yes	To prevent fleas (or other pests)	No	NA	Advantix;Frontline or Frontline Combo spot on;NexGard	NexGard	12	From a veterinary practice	No	Yes	NA	Yes	No	No	NA	Yes	July	4	In their own bed	In their own bed	Every 3 months	Every day	Every month	In a bath, sink or shower	Never	30 minutes	2 hours	Mainly on unpaved surfaces like field margins, forest tracks or the beach	Never	10	Bag and bin (specific dog poo bin);Flush down the toilet	Flush down the toilet	No	NA	NA	NA	NA	NA	NA	NA	NA	NA	NA	NA	NA
2020/06/23 9:12:18 PM GMT+1	Cat	NA	NA	NA	NA	NA	NA	NA	NA	NA	NA	NA	NA	NA	NA	NA	NA	NA	NA	NA	NA	NA	NA	NA	NA	NA	NA	NA	NA	NA	NA	NA	NA	NA	NA	NA	NA	Small (below 4kg)	NA	16	Yes	To prevent fleas (or other pests)	No	NA	Frontline or Frontline Combo	Frontline or Frontline Combo	1	From a veterinary practice	No
2020/06/23 9:14:36 PM GMT+1	Dog	Medium (10-20 kg)	11	2	Yes	To prevent fleas (or other pests)	No	NA	Bravecto tablet	Bravecto tablet	4	From a veterinary practice	Don't know	NA	NA	No	No	No	NA	No	NA	12	In their own bed	In their own bed	Every month	Every day	Every 3 months	In a bath, sink or shower	Every month	1 hour	3 hours	Mainly on unpaved surfaces like field margins, forest tracks or the beach	Yes, I walk my dog even if it is raining heavily and my dog gets completely wet	10	Bag and bin (specific dog poo bin)	Bag and bin (specific dog poo bin)	No	NA	NA	NA	NA	NA	NA	NA	NA	NA	NA	NA	NA
2020/06/23 9:14:54 PM GMT+1	Cat	NA	NA	NA	NA	NA	NA	NA	NA	NA	NA	NA	NA	NA	NA	NA	NA	NA	NA	NA	NA	NA	NA	NA	NA	NA	NA	NA	NA	NA	NA	NA	NA	NA	NA	NA	NA	Small (below 4kg)	NA	16	Yes	In response to a flea infestation	No	NA	Frontline or Frontline Combo	Frontline or Frontline Combo	6	Online	No
2020/06/23 9:18:23 PM GMT+1	Dog	Large (20-40kg)	23	9	Yes	To prevent fleas (or other pests)	No	NA	Effipro Spot On	Effipro Spot On	5	Online	Yes	Yes	Yes	No	No	No	NA	No	NA	4	In their own bed;On the floor	In their own bed	Every month	Every day	Every month	At the groomers	Every 6 months	2 hours	2 hours	Mainly on unpaved surfaces like field margins, forest tracks or the beach	Yes, I will walk my dog in light drizzle	10	Bag and bin (specific dog poo bin)	Bag and bin (specific dog poo bin)	No	NA	NA	NA	NA	NA	NA	NA	NA	NA	NA	NA	NA
2020/06/23 9:38:57 PM GMT+1	Cat	NA	NA	NA	NA	NA	NA	NA	NA	NA	NA	NA	NA	NA	NA	NA	NA	NA	NA	NA	NA	NA	NA	NA	NA	NA	NA	NA	NA	NA	NA	NA	NA	NA	NA	NA	NA	Large (above 4 kg)	4.9	9	Yes	To prevent fleas (or other pests)	No	NA	Stronghold	Stronghold	5	From a veterinary practice	Yes
2020/06/23 9:40:23 PM GMT+1	Cat	NA	NA	NA	NA	NA	NA	NA	NA	NA	NA	NA	NA	NA	NA	NA	NA	NA	NA	NA	NA	NA	NA	NA	NA	NA	NA	NA	NA	NA	NA	NA	NA	NA	NA	NA	NA	Large (above 4 kg)	5	7	Yes	To prevent fleas (or other pests)	No	NA	Advocate	Advocate	2	From a veterinary practice	No
[truncated: 153 more rows]
[truncated: 31 more columns]
